# Supplementary material
Source: HighWire-hosted journal article supplement (https://jmg.bmj.com/content/59/7/652)
Supplement: inline-supplementary-material-4 [file inline-supplementary-material-4.xlsx]

## Sheet: MLH1
Table S3A. Non-coding variants of MLH1 in general Chinese population
No.	Chr	Position	Mutation Type	Ref. (NM_000249.3)	Alt	dbSNP150	Case Number	Carrier Number	Carrier Rate (%)
1	3	37034815	UTR5	G	C	-	10588	1	0.00944465
2	3	37034819	UTR5	A	G	rs909378684	10588	9.5	0.0897242
3	3	37035162	Intron 1-2	G	A	rs904872305	10588	1	0.00944465
4	3	37035162	Intron 1-2	G	T	-	10588	1	0.00944465
5	3	37035173	Intron 1-2	C	A	-	10588	1.5	0.014167
6	3	37035190	Intron 1-2	T	A	rs774113621	17547	34	0.193765
7	3	37035200	Intron 1-2	C	T	-	10588	1	0.00944465
8	3	37035208	Intron 1-2	G	A	rs764613538	10588	1	0.00944465
9	3	37035220	Intron 1-2	C	G	-	10588	1	0.00944465
10	3	37035225	Intron 1-2	A	G	-	10588	1	0.00944465
11	3	37035233	Intron 1-2	TT	-	-	10588	1	0.00944465
12	3	37035241	Intron 1-2	G	C	-	13245	2	0.0151
13	3	37035264	Intron 1-2	G	T	-	13245	3	0.0226501
14	3	37035306	Intron 1-2	C	A	-	2657	1	0.0376364
15	3	37035321	Intron 1-2	T	A	rs543749635	13335	3	0.0224972
16	3	37035322	Intron 1-2	C	A	rs561909643	13335	3	0.0224972
17	3	37035327	Intron 1-2	G	C	-	10588	1	0.00944465
18	3	37035338	Intron 1-2	T	G	-	10588	1	0.00944465
19	3	37035349	Intron 1-2	C	G	-	10588	1	0.00944465
20	3	37035353	Intron 1-2	C	T	rs561267247	10588	1	0.00944465
21	3	37035353	Intron 1-2	C	A	-	10588	1	0.00944465
22	3	37035354	Intron 1-2	C	A	-	2657	1	0.0376364
23	3	37035358	Intron 1-2	G	T	-	10588	1	0.00944465
24	3	37035368	Intron 1-2	G	A	-	10588	1	0.00944465
25	3	37035374	Intron 1-2	T	G	rs4647205	14890	5.5	0.0369375
26	3	37035380	Intron 1-2	GT	-	-	4302	2	0.04649
27	3	37035380	Intron 1-2	-	CT	-	10588	1	0.00944465
28	3	37035412	Intron 1-2	T	C	-	2657	1	0.0376364
29	3	37035415	Intron 1-2	T	C	-	4302	2	0.04649
30	3	37035427	Intron 1-2	TAAG	-	-	10588	1	0.00944465
31	3	37035431	Intron 1-2	G	A	-	10588	1	0.00944465
32	3	37035449	Intron 1-2	T	G	-	10588	1	0.00944465
33	3	37035466	Intron 1-2	G	A	-	10588	1	0.00944465
34	3	37035468	Intron 1-2	A	T	-	10588	1	0.00944465
35	3	37035485	Intron 1-2	A	T	-	10588	1	0.00944465
36	3	37035487	Intron 1-2	G	A	-	13245	2.5	0.018875
37	3	37035489	Intron 1-2	A	G	-	10588	1	0.00944465
38	3	37035545	Intron 1-2	T	C	-	10588	1	0.00944465
39	3	37035551	Intron 1-2	C	G	-	10588	1	0.00944465
40	3	37035571	Intron 1-2	CA	-	-	10588	1	0.00944465
41	3	37035617	Intron 1-2	A	G	-	10588	4	0.0377786
42	3	37035629	Intron 1-2	T	C	rs956093209	13245	3.5	0.0264251
43	3	37035636	Intron 1-2	T	C	rs1046189108	2657	1	0.0376364
44	3	37035646	Intron 1-2	-	TGAT	-	13245	9.5	0.0717252
45	3	37035652	Intron 1-2	C	G	-	10588	1	0.00944465
46	3	37035653	Intron 1-2	-	C	-	10588	1	0.00944465
47	3	37035664	Intron 1-2	G	C	-	10588	1.5	0.014167
48	3	37035671	Intron 1-2	G	T	rs928946655	10588	1	0.00944465
49	3	37035678	Intron 1-2	C	T	-	13245	4	0.0302001
50	3	37035686	Intron 1-2	A	C	-	10588	1	0.00944465
51	3	37035697	Intron 1-2	C	T	-	10588	1	0.00944465
52	3	37035765	Intron 1-2	T	C	rs928999717	10588	1	0.00944465
53	3	37035788	Intron 1-2	TG	-	-	10588	1	0.00944465
54	3	37035794	Intron 1-2	-	A	-	10588	2	0.0188893
55	3	37035805	Intron 1-2	A	G	rs73826932	10588	3.5	0.0330563
56	3	37035823	Intron 1-2	AT	-	-	10588	1	0.00944465
57	3	37035834	Intron 1-2	A	G	rs3774343	13335	885.5	6.64042
58	3	37035842	Intron 1-2	G	A	-	10588	1	0.00944465
59	3	37035846	Intron 1-2	A	G	-	10588	1	0.00944465
60	3	37035874	Intron 1-2	C	G	-	10588	1	0.00944465
61	3	37035956	Intron 1-2	G	C	-	2657	1	0.0376364
62	3	37035970	Intron 1-2	T	A	-	13245	2	0.0151
63	3	37035981	Intron 1-2	T	-	-	610	1	0.163934
64	3	37036004	Intron 1-2	T	G	-	10588	1	0.00944465
65	3	37036053	Intron 1-2	A	G	rs890731467	10588	2	0.0188893
66	3	37036058	Intron 1-2	A	T	-	10588	1	0.00944465
67	3	37036099	Intron 1-2	-	G	rs3836491	13245	888	6.70442
68	3	37036129	Intron 1-2	T	C	rs1039260640	10588	1	0.00944465
69	3	37036132	Intron 1-2	A	C	-	10588	1	0.00944465
70	3	37036144	Intron 1-2	A	G	-	10588	1	0.00944465
71	3	37036149	Intron 1-2	C	T	-	10588	1	0.00944465
72	3	37036174	Intron 1-2	A	G	-	10588	1	0.00944465
73	3	37036197	Intron 1-2	G	C	-	10588	1	0.00944465
74	3	37036202	Intron 1-2	C	A	-	2657	1	0.0376364
75	3	37036214	Intron 1-2	T	C	rs140562275	10588	1	0.00944465
76	3	37036229	Intron 1-2	A	G	-	10588	1	0.00944465
77	3	37036232	Intron 1-2	C	G	-	13245	3.5	0.0264251
78	3	37036245	Intron 1-2	C	T	-	2657	1	0.0376364
79	3	37036251	Intron 1-2	A	C	-	10588	8	0.0755572
80	3	37036268	Intron 1-2	T	C	-	10588	1	0.00944465
81	3	37036276	Intron 1-2	TTAC	-	-	13245	26	0.1963
82	3	37036291	Intron 1-2	TTTTTATTTTT	-	-	2657	22	0.828002
83	3	37036301	Intron 1-2	T	A	rs76307598	2747	94	3.42191
84	3	37036313	Intron 1-2	T	G	-	2657	2	0.0752729
85	3	37036338	Intron 1-2	C	T	-	10588	1.5	0.014167
86	3	37036359	Intron 1-2	G	T	-	10588	1	0.00944465
87	3	37036362	Intron 1-2	C	T	-	10588	1	0.00944465
88	3	37036387	Intron 1-2	C	T	-	10588	1	0.00944465
89	3	37036396	Intron 1-2	T	C	-	10588	1	0.00944465
90	3	37036400	Intron 1-2	A	G	-	10588	1	0.00944465
91	3	37036405	Intron 1-2	ATTCTCCT	-	-	10588	1	0.00944465
92	3	37036416	Intron 1-2	C	T	-	10588	1	0.00944465
93	3	37036466	Intron 1-2	T	C	-	10588	1	0.00944465
94	3	37036490	Intron 1-2	G	A	-	10588	1	0.00944465
95	3	37036492	Intron 1-2	G	A	-	10588	1	0.00944465
96	3	37036524	Intron 1-2	CT	-	-	10588	1	0.00944465
97	3	37036529	Intron 1-2	C	T	rs374640735	13245	39.5	0.298226
98	3	37036530	Intron 1-2	G	T	-	10588	1	0.00944465
99	3	37036533	Intron 1-2	C	T	-	13245	2	0.0151
100	3	37036544	Intron 1-2	C	T	-	10588	1	0.00944465
101	3	37036545	Intron 1-2	G	A	rs757782182	10588	2.5	0.0236116
102	3	37036565	Intron 1-2	G	A	-	10588	1	0.00944465
103	3	37036575	Intron 1-2	T	C	-	10588	1	0.00944465
104	3	37036582	Intron 1-2	G	A	-	2657	1	0.0376364
105	3	37036591	Intron 1-2	C	T	-	13245	4	0.0302001
106	3	37036593	Intron 1-2	C	T	-	2657	1	0.0376364
107	3	37036594	Intron 1-2	G	A	rs376178230	13245	5	0.0377501
108	3	37036601	Intron 1-2	G	-	-	10588	1	0.00944465
109	3	37036611	Intron 1-2	A	G	rs994150251	13245	19	0.14345
110	3	37036649	Intron 1-2	A	G	-	10588	1	0.00944465
111	3	37036652	Intron 1-2	G	A	-	10588	1	0.00944465
112	3	37036684	Intron 1-2	G	A	rs13096329	13945	3486	24.9982
113	3	37036692	Intron 1-2	C	T	-	10588	1	0.00944465
114	3	37036697	Intron 1-2	A	G	-	10588	1	0.00944465
115	3	37036705	Intron 1-2	G	A	-	10588	1	0.00944465
116	3	37036727	Intron 1-2	G	A	rs556643531	13245	2	0.0151
117	3	37036728	Intron 1-2	C	T	-	10588	4	0.0377786
118	3	37036729	Intron 1-2	G	A	rs113916162	10588	3.5	0.0330563
119	3	37036739	Intron 1-2	A	G	rs535861849	13335	3.5	0.0262467
120	3	37036781	Intron 1-2	A	T	-	10588	1	0.00944465
121	3	37036800	Intron 1-2	A	G	-	2657	3	0.112909
122	3	37036811	Intron 1-2	A	G	rs188585500	13335	41.5	0.311211
123	3	37036832	Intron 1-2	G	A	rs181040714	13245	5.5	0.0415251
124	3	37036866	Intron 1-2	-	T	rs576719628	2657	1	0.0376364
125	3	37036884	Intron 1-2	A	T	rs553523250	13245	9.5	0.0717252
126	3	37036891	Intron 1-2	C	G	rs578223465	90	1	1.11111
127	3	37036891	Intron 1-2	C	T	-	10588	1	0.00944465
128	3	37036900	Intron 1-2	C	T	-	10588	1.5	0.014167
129	3	37036905	Intron 1-2	C	T	rs974432920	10588	1	0.00944465
130	3	37036906	Intron 1-2	G	A	rs921587665	10588	1	0.00944465
131	3	37036919	Intron 1-2	C	T	rs113307218	2657	1	0.0376364
132	3	37036961	Intron 1-2	C	T	rs563793393	10588	1	0.00944465
133	3	37036979	Intron 1-2	C	T	-	10588	1	0.00944465
134	3	37036983	Intron 1-2	C	G	-	10588	1	0.00944465
135	3	37036984	Intron 1-2	G	A	rs112368501	10588	3.5	0.0330563
136	3	37037004	Intron 1-2	G	A	rs1055761961	13245	47.5	0.358626
137	3	37037011	Intron 1-2	C	-	-	10588	3.5	0.0330563
138	3	37037019	Intron 1-2	G	-	-	2657	2	0.0752729
139	3	37037026	Intron 1-2	T	C	-	10588	1	0.00944465
140	3	37037047	Intron 1-2	-	G	-	2657	27	1.01618
141	3	37037059	Intron 1-2	A	C	-	10588	1	0.00944465
142	3	37037068	Intron 1-2	G	A	rs113075716	10588	3.5	0.0330563
143	3	37037079	Intron 1-2	G	A	-	10588	1	0.00944465
144	3	37037090	Intron 1-2	C	A	-	10588	1.5	0.014167
145	3	37037112	Intron 1-2	G	A	-	10588	1	0.00944465
146	3	37037114	Intron 1-2	C	T	-	10588	1	0.00944465
147	3	37037121	Intron 1-2	A	G	rs955206698	10588	1	0.00944465
148	3	37037128	Intron 1-2	G	A	-	13245	5.5	0.0415251
149	3	37037147	Intron 1-2	C	T	-	10588	1	0.00944465
150	3	37037148	Intron 1-2	C	T	-	10588	1	0.00944465
151	3	37037152	Intron 1-2	-	CCAGCCTA	-	13245	7	0.0528501
152	3	37037160	Intron 1-2	A	G	rs973870933	2657	8	0.301091
153	3	37037180	Intron 1-2	A	C	-	10588	1	0.00944465
154	3	37037193	Intron 1-2	-	G	-	10588	1	0.00944465
155	3	37037217	Intron 1-2	T	C	-	10588	1	0.00944465
156	3	37037223	Intron 1-2	C	T	-	10588	1	0.00944465
157	3	37037223	Intron 1-2	C	A	-	10588	1	0.00944465
158	3	37037228	Intron 1-2	TAGAAAATT	-	-	10588	1	0.00944465
159	3	37037237	Intron 1-2	T	G	-	10588	1	0.00944465
160	3	37037253	Intron 1-2	T	C	-	13245	2	0.0151
161	3	37037268	Intron 1-2	A	G	-	13245	2	0.0151
162	3	37037279	Intron 1-2	T	C	rs568598001	10678	2	0.0187301
163	3	37037286	Intron 1-2	A	C	rs572499444	10588	1	0.00944465
164	3	37037287	Intron 1-2	-	A	-	10588	1	0.00944465
165	3	37037305	Intron 1-2	-	T	-	2657	1	0.0376364
166	3	37037318	Intron 1-2	T	G	rs151281247	2657	2	0.0752729
167	3	37037336	Intron 1-2	-	A	-	2657	2	0.0752729
168	3	37037345	Intron 1-2	G	T	-	2657	71	2.67219
169	3	37037347	Intron 1-2	C	A	-	10588	1	0.00944465
170	3	37037354	Intron 1-2	G	T	-	10588	1	0.00944465
171	3	37037360	Intron 1-2	G	A	-	10588	1	0.00944465
172	3	37037366	Intron 1-2	G	A	-	10588	1	0.00944465
173	3	37037375	Intron 1-2	C	T	rs146879127	2657	1	0.0376364
174	3	37037376	Intron 1-2	G	A	rs553393916	10588	1	0.00944465
175	3	37037377	Intron 1-2	C	T	rs578196413	10588	1	0.00944465
176	3	37037395	Intron 1-2	A	G	-	10588	1	0.00944465
177	3	37037402	Intron 1-2	C	T	-	10588	2	0.0188893
178	3	37037406	Intron 1-2	C	A	rs557621918	13335	4	0.0299963
179	3	37037435	Intron 1-2	C	T	rs1020364131	10588	1	0.00944465
180	3	37037457	Intron 1-2	G	A	-	10588	1	0.00944465
181	3	37037461	Intron 1-2	T	G	-	13245	2.5	0.018875
182	3	37037464	Intron 1-2	G	A	-	13245	2.5	0.018875
183	3	37037466	Intron 1-2	C	T	-	10588	1	0.00944465
184	3	37037486	Intron 1-2	G	T	-	10588	1.5	0.014167
185	3	37037518	Intron 1-2	T	C	-	10588	1	0.00944465
186	3	37037537	Intron 1-2	C	G	-	10588	1	0.00944465
187	3	37037560	Intron 1-2	C	T	rs561328553	10588	1	0.00944465
188	3	37037561	Intron 1-2	G	A	rs187662725	2657	1	0.0376364
189	3	37037563	Intron 1-2	C	T	-	10588	1	0.00944465
190	3	37037583	Intron 1-2	G	A	-	10588	1	0.00944465
191	3	37037601	Intron 1-2	A	G	-	10588	1	0.00944465
192	3	37037606	Intron 1-2	G	A	rs745813461	13245	7.5	0.0566251
193	3	37037625	Intron 1-2	T	C	-	10588	1	0.00944465
194	3	37037634	Intron 1-2	A	G	-	10588	1	0.00944465
195	3	37037680	Intron 1-2	G	A	rs183711573	10588	1	0.00944465
196	3	37037686	Intron 1-2	A	G	rs983272236	13245	14.5	0.109475
197	3	37037716	Intron 1-2	G	A	rs4647206	10588	2	0.0188893
198	3	37037739	Intron 1-2	A	G	rs116529760	2657	2	0.0752729
199	3	37037742	Intron 1-2	T	C	rs1050318479	10588	1	0.00944465
200	3	37037791	Intron 1-2	C	G	-	10588	1	0.00944465
201	3	37037811	Intron 1-2	GAGAA	-	-	10588	1	0.00944465
202	3	37037820	Intron 1-2	A	T	-	10588	1	0.00944465
203	3	37037824	Intron 1-2	C	T	-	2657	2	0.0752729
204	3	37037830	Intron 1-2	A	G	rs572197188	2657	1	0.0376364
205	3	37037840	Intron 1-2	A	G	-	13245	18.5	0.139675
206	3	37037856	Intron 1-2	G	T	rs533575249	10588	1	0.00944465
207	3	37037856	Intron 1-2	G	A	-	10588	1	0.00944465
208	3	37037861	Intron 1-2	C	T	rs1056713793	10588	1	0.00944465
209	3	37037862	Intron 1-2	T	C	-	10588	1	0.00944465
210	3	37037865	Intron 1-2	C	G	rs2289038	10588	5	0.0472233
211	3	37037900	Intron 1-2	A	C	-	10588	1	0.00944465
212	3	37037939	Intron 1-2	C	T	rs536707803	10588	1	0.00944465
213	3	37037970	Intron 1-2	G	A	-	11198	2.5	0.0223254
214	3	37037973	Intron 1-2	T	C	rs943546235	10588	1	0.00944465
215	3	37037980	Intron 1-2	-	A	-	10588	1.5	0.014167
216	3	37037987	Intron 1-2	A	G	-	10588	1	0.00944465
217	3	37037997	Intron 1-2	A	G	-	10588	1	0.00944465
218	3	37038007	Intron 1-2	T	G	-	10588	1	0.00944465
219	3	37038008	Intron 1-2	A	G	rs749832952	2657	1	0.0376364
220	3	37038011	Intron 1-2	TTTGTA	-	-	10588	1	0.00944465
221	3	37038016	Intron 1-2	T	G	-	10588	1	0.00944465
222	3	37038057	Intron 1-2	T	A	-	10588	1	0.00944465
223	3	37038057	Intron 1-2	T	C	rs1004320156	10588	1	0.00944465
224	3	37038063	Intron 1-2	TAGAG	-	-	2657	2	0.0752729
225	3	37038064	Intron 1-2	TAGAG	-	rs587778895	4302	2	0.04649
226	3	37038077	Intron 1-2	G	C	-	14890	2	0.0134318
227	3	37038084	Intron 1-2	A	G	-	10588	2	0.0188893
228	3	37038100	Intron 1-2	G	A	rs576724240	18157	18.5	0.101889
229	3	37038206	Intron 2-3	T	A	-	10588	1	0.00944465
230	3	37038235	Intron 2-3	C	T	rs376593743	2657	1	0.0376364
231	3	37038236	Intron 2-3	G	T	-	10588	1	0.00944465
232	3	37038236	Intron 2-3	G	A	rs989527204	10588	1	0.00944465
233	3	37038251	Intron 2-3	C	T	rs562301875	10588	3	0.028334
234	3	37038251	Intron 2-3	C	G	-	10588	1	0.00944465
235	3	37038256	Intron 2-3	C	G	rs548238760	11198	3.5	0.0312556
236	3	37038289	Intron 2-3	A	G	-	10588	1	0.00944465
237	3	37038292	Intron 2-3	G	T	-	10588	1	0.00944465
238	3	37038333	Intron 2-3	A	-	-	13245	12	0.0906002
239	3	37038334	Intron 2-3	A	-	-	610	1	0.163934
240	3	37038345	Intron 2-3	A	G	rs752954919	10588	1.5	0.014167
241	3	37038347	Intron 2-3	T	C	-	10588	3	0.028334
242	3	37038349	Intron 2-3	T	C	-	10588	1	0.00944465
243	3	37038360	Intron 2-3	C	T	rs200296736	10588	1	0.00944465
244	3	37038410	Intron 2-3	C	T	-	13245	2.5	0.018875
245	3	37038454	Intron 2-3	ATATT	-	-	10588	1	0.00944465
246	3	37038458	Intron 2-3	TA	-	-	10588	1	0.00944465
247	3	37038473	Intron 2-3	T	G	rs551302173	2657	1	0.0376364
248	3	37038543	Intron 2-3	A	G	-	2657	1	0.0376364
249	3	37038544	Intron 2-3	T	C	-	10588	1.5	0.014167
250	3	37038566	Intron 2-3	A	G	-	2657	1	0.0376364
251	3	37038567	Intron 2-3	A	G	-	10588	1	0.00944465
252	3	37038591	Intron 2-3	C	A	-	10588	1	0.00944465
253	3	37038592	Intron 2-3	G	A	rs952191157	10588	1	0.00944465
254	3	37038601	Intron 2-3	C	G	-	13245	6	0.0453001
255	3	37038614	Intron 2-3	G	T	-	90	1	1.11111
256	3	37038639	Intron 2-3	G	C	-	10588	1.5	0.014167
257	3	37038656	Intron 2-3	C	G	-	2657	1	0.0376364
258	3	37038657	Intron 2-3	G	T	-	17547	13	0.0740867
259	3	37038657	Intron 2-3	G	A	-	10588	2	0.0188893
260	3	37038658	Intron 2-3	AA	-	-	10588	1	0.00944465
261	3	37038663	Intron 2-3	A	T	-	10588	1	0.00944465
262	3	37038692	Intron 2-3	-	A	-	10588	1	0.00944465
263	3	37038701	Intron 2-3	A	G	rs772798600	17547	11	0.0626888
264	3	37038735	Intron 2-3	G	A	-	10588	1	0.00944465
265	3	37038741	Intron 2-3	G	A	-	17547	17	0.0968827
266	3	37038771	Intron 2-3	C	T	rs9852378	17637	1287	7.29716
267	3	37038771	Intron 2-3	C	A	-	14890	4.5	0.0302216
268	3	37038805	Intron 2-3	-	T	-	4302	2	0.04649
269	3	37038829	Intron 2-3	A	G	-	10588	1	0.00944465
270	3	37038832	Intron 2-3	G	A	-	10588	1	0.00944465
271	3	37038858	Intron 2-3	G	A	rs373717163	13245	34	0.256701
272	3	37038866	Intron 2-3	G	T	-	2657	1	0.0376364
273	3	37038870	Intron 2-3	T	-	-	2657	10	0.376364
274	3	37038887	Intron 2-3	TT	-	-	13245	2	0.0151
275	3	37038893	Intron 2-3	C	G	-	10588	1	0.00944465
276	3	37038904	Intron 2-3	-	A	-	10588	2	0.0188893
277	3	37038913	Intron 2-3	A	T	-	10588	1	0.00944465
278	3	37038956	Intron 2-3	A	C	-	10588	2	0.0188893
279	3	37038958	Intron 2-3	T	A	-	610	1	0.163934
280	3	37038964	Intron 2-3	T	C	-	2657	1	0.0376364
281	3	37038967	Intron 2-3	A	G	-	10588	1	0.00944465
282	3	37039024	Intron 2-3	A	G	-	10588	2.5	0.0236116
283	3	37039032	Intron 2-3	T	C	-	10588	1	0.00944465
284	3	37039039	Intron 2-3	AG	-	-	10588	6.5	0.0613903
285	3	37039074	Intron 2-3	G	A	-	10588	1	0.00944465
286	3	37039078	Intron 2-3	A	G	-	10588	1	0.00944465
287	3	37039104	Intron 2-3	A	T	-	10588	2.5	0.0236116
288	3	37039112	Intron 2-3	G	T	-	10588	1.5	0.014167
289	3	37039151	Intron 2-3	C	A	rs551263292	10588	8	0.0755572
290	3	37039152	Intron 2-3	A	T	-	13245	8.5	0.0641752
291	3	37039162	Intron 2-3	A	G	-	10588	1	0.00944465
292	3	37039186	Intron 2-3	G	A	-	2657	1	0.0376364
293	3	37039192	Intron 2-3	T	C	-	2657	1	0.0376364
294	3	37039198	Intron 2-3	T	G	-	10588	1	0.00944465
295	3	37039207	Intron 2-3	G	A	rs569435999	90	1	1.11111
296	3	37039229	Intron 2-3	G	A	-	10588	1	0.00944465
297	3	37039275	Intron 2-3	A	G	-	10588	1	0.00944465
298	3	37039294	Intron 2-3	T	C	-	10588	1	0.00944465
299	3	37039330	Intron 2-3	A	T	-	10588	1.5	0.014167
300	3	37039334	Intron 2-3	C	T	rs983889832	13245	4.5	0.0339751
301	3	37039335	Intron 2-3	G	A	rs909594443	13245	2	0.0151
302	3	37039343	Intron 2-3	C	G	rs143297608	13245	21	0.15855
303	3	37039352	Intron 2-3	T	C	rs148314286	10588	1	0.00944465
304	3	37039354	Intron 2-3	G	A	-	13245	2	0.0151
305	3	37039355	Intron 2-3	G	A	-	10588	1	0.00944465
306	3	37039358	Intron 2-3	G	A	-	10588	1	0.00944465
307	3	37039362	Intron 2-3	G	A	-	10588	1	0.00944465
308	3	37039390	Intron 2-3	C	T	rs377282270	10588	1	0.00944465
309	3	37039419	Intron 2-3	C	T	rs946842742	10588	1	0.00944465
310	3	37039424	Intron 2-3	G	A	-	10588	1	0.00944465
311	3	37039430	Intron 2-3	G	A	-	10588	1	0.00944465
312	3	37039440	Intron 2-3	G	A	-	13245	2	0.0151
313	3	37039464	Intron 2-3	G	A	rs141416340	10588	2	0.0188893
314	3	37039477	Intron 2-3	C	T	rs900560103	10588	1.5	0.014167
315	3	37039478	Intron 2-3	G	A	rs1056375888	10588	1.5	0.014167
316	3	37039496	Intron 2-3	G	A	-	10588	1.5	0.014167
317	3	37039504	Intron 2-3	G	A	rs188833187	13245	3.5	0.0264251
318	3	37039517	Intron 2-3	C	T	-	10588	1	0.00944465
319	3	37039518	Intron 2-3	G	A	rs542153867	2657	3	0.112909
320	3	37039523	Intron 2-3	G	A	rs905703266	10588	1	0.00944465
321	3	37039538	Intron 2-3	G	A	rs541113381	10588	1.5	0.014167
322	3	37039561	Intron 2-3	C	A	-	2657	3	0.112909
323	3	37039561	Intron 2-3	AAAAAAAAAAAAAAAA	-	-	2657	4	0.150546
324	3	37039603	Intron 2-3	T	C	-	10678	2	0.0187301
325	3	37039616	Intron 2-3	A	G	-	10588	1	0.00944465
326	3	37039621	Intron 2-3	T	G	-	10588	1	0.00944465
327	3	37039624	Intron 2-3	T	C	-	10588	1	0.00944465
328	3	37039631	Intron 2-3	T	C	-	10588	1	0.00944465
329	3	37039654	Intron 2-3	A	G	-	10588	1	0.00944465
330	3	37039672	Intron 2-3	C	G	-	10588	1	0.00944465
331	3	37039685	Intron 2-3	C	T	-	10588	1	0.00944465
332	3	37039687	Intron 2-3	A	G	rs181254165	10588	1	0.00944465
333	3	37039697	Intron 2-3	A	C	-	10588	1	0.00944465
334	3	37039703	Intron 2-3	A	G	-	10588	1	0.00944465
335	3	37039730	Intron 2-3	G	T	-	610	1	0.163934
336	3	37039733	Intron 2-3	A	G	-	10588	1.5	0.014167
337	3	37039733	Intron 2-3	A	C	-	10588	1	0.00944465
338	3	37039748	Intron 2-3	T	A	-	13245	12.5	0.0943752
339	3	37039767	Intron 2-3	T	C	rs548873260	13245	3	0.0226501
340	3	37039788	Intron 2-3	C	T	-	2657	1	0.0376364
341	3	37039814	Intron 2-3	ATAATT	-	-	2657	1	0.0376364
342	3	37039856	Intron 2-3	A	-	-	610	1	0.163934
343	3	37039882	Intron 2-3	G	A	-	2657	1	0.0376364
344	3	37039887	Intron 2-3	C	G	-	10588	1	0.00944465
345	3	37039901	Intron 2-3	A	G	rs1005414785	10588	1	0.00944465
346	3	37039921	Intron 2-3	A	G	rs566905321	10678	3	0.0280951
347	3	37039927	Intron 2-3	G	A	-	10588	1	0.00944465
348	3	37039931	Intron 2-3	G	T	-	10588	1	0.00944465
349	3	37039932	Intron 2-3	C	T	rs1017173086	2657	1	0.0376364
350	3	37039945	Intron 2-3	C	T	rs955040388	10588	1	0.00944465
351	3	37039946	Intron 2-3	G	A	-	13245	3.5	0.0264251
352	3	37039962	Intron 2-3	A	C	-	10588	1	0.00944465
353	3	37040008	Intron 2-3	G	A	-	10588	1	0.00944465
354	3	37040021	Intron 2-3	A	G	-	10588	1	0.00944465
355	3	37040057	Intron 2-3	A	G	rs79870930	10588	1	0.00944465
356	3	37040095	Intron 2-3	C	T	rs79028303	10588	3.5	0.0330563
357	3	37040097	Intron 2-3	T	C	-	10588	1	0.00944465
358	3	37040112	Intron 2-3	A	G	rs535345093	13245	4.5	0.0339751
359	3	37040157	Intron 2-3	C	T	rs780224118	10588	1	0.00944465
360	3	37040158	Intron 2-3	G	A	-	10588	1	0.00944465
361	3	37040198	Intron 2-3	C	A	-	2657	1	0.0376364
362	3	37040221	Intron 2-3	G	T	-	10588	1	0.00944465
363	3	37040222	Intron 2-3	A	G	-	10588	1	0.00944465
364	3	37040226	Intron 2-3	A	T	rs546007476	10588	1	0.00944465
365	3	37040238	Intron 2-3	G	A	-	10588	1	0.00944465
366	3	37040292	Intron 2-3	G	C	-	10588	1	0.00944465
367	3	37040328	Intron 2-3	T	G	rs4647208	10588	3.5	0.0330563
368	3	37040343	Intron 2-3	T	C	-	10588	1	0.00944465
369	3	37040347	Intron 2-3	A	G	rs993974907	10588	1	0.00944465
370	3	37040353	Intron 2-3	T	G	-	10588	1	0.00944465
371	3	37040354	Intron 2-3	T	A	rs4647209	13245	19.5	0.147225
372	3	37040359	Intron 2-3	TTA	-	-	13245	2.5	0.018875
373	3	37040381	Intron 2-3	T	C	-	10588	1	0.00944465
374	3	37040389	Intron 2-3	A	C	-	10588	1	0.00944465
375	3	37040405	Intron 2-3	G	A	-	13245	2	0.0151
376	3	37040433	Intron 2-3	T	C	-	13245	4	0.0302001
377	3	37040456	Intron 2-3	G	C	-	10588	1	0.00944465
378	3	37040476	Intron 2-3	A	G	rs369525565	10588	1	0.00944465
379	3	37040479	Intron 2-3	T	C	-	10588	1	0.00944465
380	3	37040480	Intron 2-3	C	G	-	10588	1	0.00944465
381	3	37040488	Intron 2-3	G	C	-	13245	2	0.0151
382	3	37040501	Intron 2-3	C	A	rs200312917	10588	1	0.00944465
383	3	37040502	Intron 2-3	C	A	-	10588	1	0.00944465
384	3	37040508	Intron 2-3	C	T	-	10588	1	0.00944465
385	3	37040522	Intron 2-3	C	T	-	10588	1	0.00944465
386	3	37040582	Intron 2-3	T	-	-	10588	1	0.00944465
387	3	37040601	Intron 2-3	G	A	-	10588	1	0.00944465
388	3	37040616	Intron 2-3	C	T	-	10588	1	0.00944465
389	3	37040686	Intron 2-3	A	G	-	10588	1	0.00944465
390	3	37040692	Intron 2-3	T	C	-	10588	1	0.00944465
391	3	37040711	Intron 2-3	A	G	-	10588	1	0.00944465
392	3	37040740	Intron 2-3	C	A	-	610	1	0.163934
393	3	37040743	Intron 2-3	G	A	-	10588	1	0.00944465
394	3	37040747	Intron 2-3	A	G	rs185790933	13245	3	0.0226501
395	3	37040748	Intron 2-3	T	C	rs4647211	13245	885	6.68177
396	3	37040786	Intron 2-3	G	A	rs4511838	597	2	0.335008
397	3	37040814	Intron 2-3	G	A	-	2657	2	0.0752729
398	3	37040881	Intron 2-3	GGGTCAAATGGTA	-	-	2657	1	0.0376364
399	3	37040955	Intron 2-3	T	G	rs1023038177	2657	1	0.0376364
400	3	37040968	Intron 2-3	A	G	-	13245	10.5	0.0792752
401	3	37040995	Intron 2-3	A	C	-	2657	1	0.0376364
402	3	37041032	Intron 2-3	-	T	rs4647214	13245	875.5	6.61004
403	3	37041045	Intron 2-3	A	C	rs895646801	10588	1.5	0.014167
404	3	37041100	Intron 2-3	A	G	-	2657	1	0.0376364
405	3	37041107	Intron 2-3	A	G	-	10588	1	0.00944465
406	3	37041109	Intron 2-3	G	A	-	10588	1	0.00944465
407	3	37041114	Intron 2-3	T	C	-	10588	1	0.00944465
408	3	37041193	Intron 2-3	G	C	-	10588	1	0.00944465
409	3	37041195	Intron 2-3	TTGT	-	-	10588	2	0.0188893
410	3	37041219	Intron 2-3	T	A	-	10588	3.5	0.0330563
411	3	37041230	Intron 2-3	-	A	-	10588	1	0.00944465
412	3	37041241	Intron 2-3	T	-	-	2657	19	0.715092
413	3	37041242	Intron 2-3	T	-	-	610	1	0.163934
414	3	37041252	Intron 2-3	T	C	-	2657	1	0.0376364
415	3	37041278	Intron 2-3	A	G	-	10588	1	0.00944465
416	3	37041286	Intron 2-3	G	A	rs956939484	13245	3	0.0226501
417	3	37041320	Intron 2-3	C	A	rs4647215	13945	889	6.37504
418	3	37041328	Intron 2-3	C	A	-	10588	1	0.00944465
419	3	37041366	Intron 2-3	C	A	-	10588	1	0.00944465
420	3	37041397	Intron 2-3	A	G	-	10588	1	0.00944465
421	3	37041415	Intron 2-3	T	G	-	2657	1	0.0376364
422	3	37041433	Intron 2-3	T	A	-	10588	1	0.00944465
423	3	37041447	Intron 2-3	G	A	-	10588	1	0.00944465
424	3	37041455	Intron 2-3	T	C	-	10588	1	0.00944465
425	3	37041457	Intron 2-3	G	C	-	10588	1	0.00944465
426	3	37041472	Intron 2-3	A	G	-	10588	1	0.00944465
427	3	37041522	Intron 2-3	C	T	-	10588	1	0.00944465
428	3	37041530	Intron 2-3	C	T	-	10588	1	0.00944465
429	3	37041535	Intron 2-3	C	T	-	10588	8	0.0755572
430	3	37041543	Intron 2-3	-	T	-	2657	1	0.0376364
431	3	37041576	Intron 2-3	C	T	-	2657	2	0.0752729
432	3	37041588	Intron 2-3	C	G	-	10588	1	0.00944465
433	3	37041618	Intron 2-3	T	C	-	10588	1	0.00944465
434	3	37041629	Intron 2-3	A	G	-	10588	1	0.00944465
435	3	37041635	Intron 2-3	G	A	rs776021096	2657	1	0.0376364
436	3	37041702	Intron 2-3	T	C	-	10588	1	0.00944465
437	3	37041772	Intron 2-3	A	T	-	10588	1	0.00944465
438	3	37041837	Intron 2-3	C	A	rs972091502	10588	1.5	0.014167
439	3	37041852	Intron 2-3	G	T	-	10588	1	0.00944465
440	3	37041858	Intron 2-3	A	G	-	10588	1	0.00944465
441	3	37041882	Intron 2-3	A	C	rs536701257	13855	9.5	0.0685673
442	3	37041959	Intron 2-3	G	A	-	10588	1	0.00944465
443	3	37041963	Intron 2-3	G	A	-	13245	2	0.0151
444	3	37042052	Intron 2-3	C	T	-	10588	1	0.00944465
445	3	37042068	Intron 2-3	A	C	-	13245	4.5	0.0339751
446	3	37042077	Intron 2-3	A	-	-	10588	1	0.00944465
447	3	37042079	Intron 2-3	A	T	-	10588	1	0.00944465
448	3	37042082	Intron 2-3	A	G	rs4647218	13335	890	6.67417
449	3	37042109	Intron 2-3	C	T	-	10588	1	0.00944465
450	3	37042116	Intron 2-3	T	C	-	10588	2	0.0188893
451	3	37042147	Intron 2-3	C	A	rs913285164	10588	1	0.00944465
452	3	37042149	Intron 2-3	C	T	rs987466298	10588	1.5	0.014167
453	3	37042152	Intron 2-3	G	C	-	10588	1	0.00944465
454	3	37042166	Intron 2-3	A	G	-	13245	2	0.0151
455	3	37042171	Intron 2-3	G	A	-	2657	1	0.0376364
456	3	37042177	Intron 2-3	A	G	-	10588	1	0.00944465
457	3	37042182	Intron 2-3	G	A	-	10588	1	0.00944465
458	3	37042213	Intron 2-3	A	G	-	13245	3.5	0.0264251
459	3	37042238	Intron 2-3	G	A	-	10588	1	0.00944465
460	3	37042248	Intron 2-3	A	C	-	10588	1	0.00944465
461	3	37042252	Intron 2-3	C	T	-	10588	1	0.00944465
462	3	37042310	Intron 2-3	C	A	-	2657	15	0.564546
463	3	37042348	Intron 2-3	-	T	rs201728718	13851	48	0.346545
464	3	37042357	Intron 2-3	T	C	rs987865775	10588	1	0.00944465
465	3	37042404	Intron 2-3	T	C	-	10588	1	0.00944465
466	3	37042423	Intron 2-3	C	G	-	2657	1	0.0376364
467	3	37042429	Intron 2-3	T	A	-	10588	1	0.00944465
468	3	37042566	Intron 3-4	T	C	rs765210251	15500	5.5	0.0354839
469	3	37042581	Intron 3-4	C	G	-	10588	1	0.00944465
470	3	37042606	Intron 3-4	G	C	-	10588	1	0.00944465
471	3	37042620	Intron 3-4	C	G	-	10588	1	0.00944465
472	3	37042650	Intron 3-4	T	G	-	10588	1	0.00944465
473	3	37042671	Intron 3-4	A	G	-	10588	1	0.00944465
474	3	37042692	Intron 3-4	-	T	-	10588	1	0.00944465
475	3	37042720	Intron 3-4	ATAA	-	-	10588	1	0.00944465
476	3	37042727	Intron 3-4	A	C	-	10588	1.5	0.014167
477	3	37042736	Intron 3-4	T	C	-	10588	1.5	0.014167
478	3	37042757	Intron 3-4	T	C	rs4647221	13245	3.5	0.0264251
479	3	37042764	Intron 3-4	C	T	-	10588	1	0.00944465
480	3	37042782	Intron 3-4	T	A	-	10588	1	0.00944465
481	3	37042811	Intron 3-4	A	G	-	13245	5.5	0.0415251
482	3	37042815	Intron 3-4	A	G	rs562193861	13245	29.5	0.222726
483	3	37042865	Intron 3-4	T	C	-	10588	1	0.00944465
484	3	37042872	Intron 3-4	AAGG	-	-	10588	1.5	0.014167
485	3	37042904	Intron 3-4	G	A	-	10588	1	0.00944465
486	3	37042931	Intron 3-4	C	T	-	10588	1	0.00944465
487	3	37042940	Intron 3-4	A	G	-	10588	1	0.00944465
488	3	37042942	Intron 3-4	A	G	-	13245	12	0.0906002
489	3	37042945	Intron 3-4	C	A	-	10588	1	0.00944465
490	3	37042956	Intron 3-4	A	G	-	13245	2	0.0151
491	3	37042960	Intron 3-4	A	C	rs4647222	13945	887	6.3607
492	3	37042976	Intron 3-4	A	C	-	10588	1	0.00944465
493	3	37043009	Intron 3-4	A	C	rs114689988	13245	3.5	0.0264251
494	3	37043011	Intron 3-4	A	G	-	10588	1	0.00944465
495	3	37043019	Intron 3-4	G	A	-	2657	1	0.0376364
496	3	37043020	Intron 3-4	G	T	-	10588	1	0.00944465
497	3	37043062	Intron 3-4	A	C	-	10588	1	0.00944465
498	3	37043076	Intron 3-4	T	C	rs866951777	10588	1	0.00944465
499	3	37043115	Intron 3-4	C	T	-	10588	1	0.00944465
500	3	37043175	Intron 3-4	G	A	rs567388698	2657	1	0.0376364
501	3	37043182	Intron 3-4	T	C	-	10588	1	0.00944465
502	3	37043218	Intron 3-4	A	T	rs4647223	10588	2	0.0188893
503	3	37043230	Intron 3-4	G	A	rs4647224	13335	890.5	6.67792
504	3	37043256	Intron 3-4	G	A	rs4647225	13245	9.5	0.0717252
505	3	37043267	Intron 3-4	T	C	rs765211196	10588	2	0.0188893
506	3	37043269	Intron 3-4	A	G	rs111823385	13245	2.5	0.018875
507	3	37043279	Intron 3-4	A	C	-	10588	1	0.00944465
508	3	37043282	Intron 3-4	G	A	rs777434981	10588	8	0.0755572
509	3	37043300	Intron 3-4	C	T	-	10588	1	0.00944465
510	3	37043314	Intron 3-4	G	A	-	13245	4.5	0.0339751
511	3	37043398	Intron 3-4	A	G	rs187442017	10588	1	0.00944465
512	3	37043405	Intron 3-4	A	G	-	10588	1	0.00944465
513	3	37043433	Intron 3-4	T	G	-	10588	1	0.00944465
514	3	37043441	Intron 3-4	C	T	-	10588	1	0.00944465
515	3	37043443	Intron 3-4	-	T	-	13245	766.5	5.78709
516	3	37043443	Intron 3-4	T	-	-	13245	923	6.96867
517	3	37043443	Intron 3-4	TT	-	-	13245	4.5	0.0339751
518	3	37043443	Intron 3-4	-	TT	-	10588	3.5	0.0330563
519	3	37043444	Intron 3-4	T	G	rs555890903	2657	1	0.0376364
520	3	37043444	Intron 3-4	T	-	rs59335282	597	1	0.167504
521	3	37043451	Intron 3-4	T	G	rs9823173	2657	2	0.0752729
522	3	37043454	Intron 3-4	T	G	rs867503094	2657	1	0.0376364
523	3	37043459	Intron 3-4	T	G	rs28393182	2657	245	9.22093
524	3	37043460	Intron 3-4	T	G	-	2657	6	0.225819
525	3	37043491	Intron 3-4	T	C	-	13245	14.5	0.109475
526	3	37043495	Intron 3-4	G	C	-	10588	1	0.00944465
527	3	37043506	Intron 3-4	A	G	rs533501586	13245	10.5	0.0792752
528	3	37043528	Intron 3-4	-	CAACCTA	-	10588	1	0.00944465
529	3	37043541	Intron 3-4	T	C	-	10588	1	0.00944465
530	3	37043544	Intron 3-4	G	C	-	10588	1	0.00944465
531	3	37043560	Intron 3-4	C	T	-	10588	1	0.00944465
532	3	37043563	Intron 3-4	G	T	rs973099184	13245	4	0.0302001
533	3	37043564	Intron 3-4	C	T	-	13245	2	0.0151
534	3	37043585	Intron 3-4	T	C	-	10588	1	0.00944465
535	3	37043594	Intron 3-4	G	A	rs1019978067	2657	1	0.0376364
536	3	37043595	Intron 3-4	C	T	-	10588	1	0.00944465
537	3	37043596	Intron 3-4	G	A	-	10588	1	0.00944465
538	3	37043629	Intron 3-4	T	G	-	10588	1	0.00944465
539	3	37043642	Intron 3-4	G	C	-	2657	1	0.0376364
540	3	37043643	Intron 3-4	G	T	rs780973037	13245	5.5	0.0415251
541	3	37043652	Intron 3-4	T	C	-	10588	1	0.00944465
542	3	37043670	Intron 3-4	-	G	-	10588	1	0.00944465
543	3	37043679	Intron 3-4	-	A	-	10588	1	0.00944465
544	3	37043700	Intron 3-4	C	T	-	10588	1	0.00944465
545	3	37043722	Intron 3-4	G	T	-	10588	1	0.00944465
546	3	37043732	Intron 3-4	T	G	-	10588	1	0.00944465
547	3	37043739	Intron 3-4	C	T	rs545400444	10588	1	0.00944465
548	3	37043742	Intron 3-4	C	A	rs193275572	13245	4.5	0.0339751
549	3	37043742	Intron 3-4	C	T	rs193275572	10588	1	0.00944465
550	3	37043748	Intron 3-4	G	A	rs145810014	13335	72.5	0.543682
551	3	37043774	Intron 3-4	CTTATA	-	-	2657	2	0.0752729
552	3	37043790	Intron 3-4	T	G	-	10588	1	0.00944465
553	3	37043796	Intron 3-4	G	A	rs4647226	13335	273	2.04724
554	3	37043825	Intron 3-4	A	G	-	13245	2	0.0151
555	3	37043839	Intron 3-4	T	A	-	10588	1	0.00944465
556	3	37043841	Intron 3-4	G	C	-	10588	1	0.00944465
557	3	37043845	Intron 3-4	A	C	-	10588	1	0.00944465
558	3	37043874	Intron 3-4	G	A	-	10588	1	0.00944465
559	3	37043889	Intron 3-4	C	T	-	10588	1	0.00944465
560	3	37043897	Intron 3-4	T	G	-	10588	1	0.00944465
561	3	37043898	Intron 3-4	T	C	-	10588	1	0.00944465
562	3	37043943	Intron 3-4	A	G	rs899775674	13245	2	0.0151
563	3	37043951	Intron 3-4	A	C	-	10588	1	0.00944465
564	3	37043965	Intron 3-4	G	A	rs4647227	10588	1	0.00944465
565	3	37044009	Intron 3-4	G	T	-	10588	2	0.0188893
566	3	37044018	Intron 3-4	C	G	-	10588	1	0.00944465
567	3	37044035	Intron 3-4	A	G	rs4647228	10588	3.5	0.0330563
568	3	37044052	Intron 3-4	C	T	-	10588	1	0.00944465
569	3	37044058	Intron 3-4	A	T	-	10588	1	0.00944465
570	3	37044072	Intron 3-4	G	T	-	10588	1	0.00944465
571	3	37044104	Intron 3-4	A	G	-	2657	1	0.0376364
572	3	37044111	Intron 3-4	C	G	-	10588	1	0.00944465
573	3	37044197	Intron 3-4	A	G	-	10588	1	0.00944465
574	3	37044221	Intron 3-4	T	C	-	10588	1	0.00944465
575	3	37044225	Intron 3-4	T	C	rs766443309	13245	2	0.0151
576	3	37044252	Intron 3-4	C	T	-	10588	1	0.00944465
577	3	37044278	Intron 3-4	A	G	-	10588	1	0.00944465
578	3	37044307	Intron 3-4	C	T	-	10588	1	0.00944465
579	3	37044311	Intron 3-4	A	G	rs4647229	10588	3.5	0.0330563
580	3	37044323	Intron 3-4	C	T	-	10588	1	0.00944465
581	3	37044327	Intron 3-4	G	A	-	10588	1	0.00944465
582	3	37044349	Intron 3-4	A	C	-	10588	1	0.00944465
583	3	37044393	Intron 3-4	A	T	-	10588	1	0.00944465
584	3	37044424	Intron 3-4	C	G	-	13245	9	0.0679502
585	3	37044430	Intron 3-4	G	A	-	10588	1	0.00944465
586	3	37044432	Intron 3-4	G	A	-	13245	2	0.0151
587	3	37044438	Intron 3-4	G	A	rs575551678	2657	1	0.0376364
588	3	37044446	Intron 3-4	G	A	-	10588	1	0.00944465
589	3	37044489	Intron 3-4	A	T	rs1540354	13945	4748	34.048
590	3	37044520	Intron 3-4	C	T	-	10588	1	0.00944465
591	3	37044521	Intron 3-4	G	T	rs564780265	10588	4	0.0377786
592	3	37044529	Intron 3-4	C	T	-	2657	1	0.0376364
593	3	37044542	Intron 3-4	A	G	-	10588	1	0.00944465
594	3	37044554	Intron 3-4	C	A	-	10588	1	0.00944465
595	3	37044569	Intron 3-4	G	T	-	10588	1	0.00944465
596	3	37044573	Intron 3-4	C	T	-	10588	1.5	0.014167
597	3	37044577	Intron 3-4	A	G	-	13245	9.5	0.0717252
598	3	37044619	Intron 3-4	-	AGCGGACGCCGTTA	-	2657	2	0.0752729
599	3	37044623	Intron 3-4	G	A	rs930542952	10588	1	0.00944465
600	3	37044627	Intron 3-4	G	A	-	2657	1	0.0376364
601	3	37044640	Intron 3-4	G	A	-	10588	1	0.00944465
602	3	37044643	Intron 3-4	A	G	-	10588	1	0.00944465
603	3	37044659	Intron 3-4	A	G	rs907716090	10588	1	0.00944465
604	3	37044689	Intron 3-4	C	T	-	10588	1	0.00944465
605	3	37044724	Intron 3-4	T	A	-	10588	1	0.00944465
606	3	37044730	Intron 3-4	G	A	-	10588	1	0.00944465
607	3	37044762	Intron 3-4	G	A	rs148049955	10588	1	0.00944465
608	3	37044765	Intron 3-4	A	G	rs141736772	13945	156	1.11868
609	3	37044807	Intron 3-4	T	C	-	2657	1	0.0376364
610	3	37044816	Intron 3-4	T	C	rs1020459947	10588	1	0.00944465
611	3	37044818	Intron 3-4	C	G	rs370480399	2657	3	0.112909
612	3	37044825	Intron 3-4	A	T	-	2657	4	0.150546
613	3	37044827	Intron 3-4	G	A	-	10588	1	0.00944465
614	3	37044842	Intron 3-4	A	C	-	10588	1	0.00944465
615	3	37044866	Intron 3-4	C	T	-	10678	2	0.0187301
616	3	37044890	Intron 3-4	-	TAGA	-	2657	1	0.0376364
617	3	37044928	Intron 3-4	C	T	rs575556851	10588	1	0.00944465
618	3	37044934	Intron 3-4	C	T	rs542638423	13245	4.5	0.0339751
619	3	37044934	Intron 3-4	C	G	-	10588	1	0.00944465
620	3	37044968	Intron 3-4	A	G	-	10588	1	0.00944465
621	3	37044969	Intron 3-4	A	G	-	10588	1	0.00944465
622	3	37045033	Intron 3-4	G	C	-	10588	3	0.028334
623	3	37045035	Intron 3-4	T	C	rs572795918	13245	46.5	0.351076
624	3	37045059	Intron 3-4	T	C	-	10588	1	0.00944465
625	3	37045061	Intron 3-4	C	T	-	10588	1	0.00944465
626	3	37045064	Intron 3-4	G	T	-	10588	1	0.00944465
627	3	37045070	Intron 3-4	C	T	-	10588	1	0.00944465
628	3	37045101	Intron 3-4	C	T	-	10588	1	0.00944465
629	3	37045108	Intron 3-4	T	G	-	10588	1	0.00944465
630	3	37045119	Intron 3-4	C	T	-	2657	1	0.0376364
631	3	37045123	Intron 3-4	C	A	-	2657	1	0.0376364
632	3	37045124	Intron 3-4	G	T	-	10588	1	0.00944465
633	3	37045124	Intron 3-4	G	A	-	10588	1	0.00944465
634	3	37045130	Intron 3-4	C	T	-	10588	1	0.00944465
635	3	37045139	Intron 3-4	C	A	-	10588	1	0.00944465
636	3	37045148	Intron 3-4	A	G	-	10588	1	0.00944465
637	3	37045156	Intron 3-4	A	G	-	10588	1	0.00944465
638	3	37045183	Intron 3-4	A	T	-	10588	1	0.00944465
639	3	37045233	Intron 3-4	A	C	rs3774341	13335	889.5	6.67042
640	3	37045238	Intron 3-4	C	T	-	10588	1	0.00944465
641	3	37045254	Intron 3-4	C	T	rs562428469	13245	20	0.151
642	3	37045280	Intron 3-4	G	T	-	10588	1	0.00944465
643	3	37045300	Intron 3-4	G	A	rs189027032	13335	30.5	0.228721
644	3	37045306	Intron 3-4	-	CACA	-	10588	1	0.00944465
645	3	37045344	Intron 3-4	C	T	-	10588	1	0.00944465
646	3	37045344	Intron 3-4	C	A	rs1004199860	610	1	0.163934
647	3	37045394	Intron 3-4	G	A	-	10588	1	0.00944465
648	3	37045413	Intron 3-4	G	T	-	10588	1	0.00944465
649	3	37045430	Intron 3-4	TTTGT	-	-	10588	1	0.00944465
650	3	37045442	Intron 3-4	T	G	-	10588	1	0.00944465
651	3	37045545	Intron 3-4	-	AT	-	10588	4.5	0.0425009
652	3	37045573	Intron 3-4	C	T	-	10588	1	0.00944465
653	3	37045594	Intron 3-4	A	G	-	10588	1	0.00944465
654	3	37045618	Intron 3-4	C	G	-	2657	1	0.0376364
655	3	37045670	Intron 3-4	G	A	-	10588	2.5	0.0236116
656	3	37045699	Intron 3-4	T	C	-	10588	1	0.00944465
657	3	37045704	Intron 3-4	-	A	-	10588	1	0.00944465
658	3	37045739	Intron 3-4	A	G	rs557564204	13855	65.5	0.472754
659	3	37045749	Intron 3-4	A	G	-	10588	1	0.00944465
660	3	37045754	Intron 3-4	G	A	-	13245	4.5	0.0339751
661	3	37045772	Intron 3-4	G	C	-	10588	1	0.00944465
662	3	37045821	Intron 3-4	C	G	-	10588	1	0.00944465
663	3	37045832	Intron 3-4	G	A	-	2657	1	0.0376364
664	3	37045863	Intron 3-4	C	A	rs139620056	14890	8.5	0.0570853
665	3	37045868	Intron 3-4	A	G	rs186521240	10588	1	0.00944465
666	3	37045871	Intron 3-4	C	A	-	10588	1	0.00944465
667	3	37045873	Intron 3-4	A	G	rs121909451	2657	1	0.0376364
668	3	37045975	Intron 4-5	T	C	-	10588	1	0.00944465
669	3	37045984	Intron 4-5	T	C	-	4302	1	0.023245
670	3	37046012	Intron 4-5	-	T	-	10588	1	0.00944465
671	3	37046021	Intron 4-5	C	T	-	10588	1	0.00944465
672	3	37046023	Intron 4-5	A	G	-	2657	2	0.0752729
673	3	37046032	Intron 4-5	A	C	-	10588	1	0.00944465
674	3	37046043	Intron 4-5	C	A	-	610	1	0.163934
675	3	37046069	Intron 4-5	C	T	rs576761595	10678	2	0.0187301
676	3	37046080	Intron 4-5	A	C	-	10588	1	0.00944465
677	3	37046084	Intron 4-5	C	T	rs754486965	2657	1	0.0376364
678	3	37046085	Intron 4-5	G	A	rs4647234	10588	3.5	0.0330563
679	3	37046112	Intron 4-5	G	T	-	10588	1	0.00944465
680	3	37046118	Intron 4-5	C	A	-	10588	1	0.00944465
681	3	37046136	Intron 4-5	G	C	-	10588	1.5	0.014167
682	3	37046140	Intron 4-5	A	G	-	10588	1	0.00944465
683	3	37046155	Intron 4-5	G	A	-	2657	1	0.0376364
684	3	37046156	Intron 4-5	G	T	-	2657	1	0.0376364
685	3	37046171	Intron 4-5	T	C	-	11198	2	0.0178603
686	3	37046214	Intron 4-5	G	A	-	10588	1	0.00944465
687	3	37046238	Intron 4-5	C	A	rs541916935	13245	50	0.377501
688	3	37046246	Intron 4-5	G	A	-	10588	1	0.00944465
689	3	37046266	Intron 4-5	C	T	rs1007386627	10588	1	0.00944465
690	3	37046271	Intron 4-5	G	A	-	2657	1	0.0376364
691	3	37046292	Intron 4-5	G	T	-	10588	1	0.00944465
692	3	37046295	Intron 4-5	T	C	-	10588	1	0.00944465
693	3	37046298	Intron 4-5	A	G	-	10588	1	0.00944465
694	3	37046298	Intron 4-5	A	T	-	10588	1	0.00944465
695	3	37046322	Intron 4-5	G	A	-	10588	1	0.00944465
696	3	37046333	Intron 4-5	C	T	rs968487327	13245	2	0.0151
697	3	37046353	Intron 4-5	C	T	-	2657	1	0.0376364
698	3	37046355	Intron 4-5	A	T	-	10588	3	0.028334
699	3	37046358	Intron 4-5	T	A	-	10588	1	0.00944465
700	3	37046369	Intron 4-5	G	A	-	10588	1	0.00944465
701	3	37046374	Intron 4-5	T	A	rs139109084	13945	207.5	1.48799
702	3	37046389	Intron 4-5	G	A	rs73055322	10588	1	0.00944465
703	3	37046400	Intron 4-5	A	G	rs1036456262	10588	1	0.00944465
704	3	37046407	Intron 4-5	G	T	-	10588	1	0.00944465
705	3	37046453	Intron 4-5	G	A	-	13245	7	0.0528501
706	3	37046488	Intron 4-5	C	T	-	2657	1	0.0376364
707	3	37046497	Intron 4-5	C	-	-	13245	27.5	0.207626
708	3	37046580	Intron 4-5	T	A	-	10588	1	0.00944465
709	3	37046604	Intron 4-5	G	A	-	10588	1	0.00944465
710	3	37046606	Intron 4-5	T	C	-	10588	1	0.00944465
711	3	37046607	Intron 4-5	T	C	-	10588	1	0.00944465
712	3	37046663	Intron 4-5	G	A	rs201023101	10588	3	0.028334
713	3	37046722	Intron 4-5	C	T	-	10588	1	0.00944465
714	3	37046738	Intron 4-5	T	G	-	2657	2	0.0752729
715	3	37046741	Intron 4-5	T	A	rs1021466079	10588	1.5	0.014167
716	3	37046755	Intron 4-5	G	A	rs576726153	2657	1	0.0376364
717	3	37046775	Intron 4-5	T	C	-	10588	1	0.00944465
718	3	37046782	Intron 4-5	A	G	-	10588	1	0.00944465
719	3	37046791	Intron 4-5	G	A	rs368729166	2657	2	0.0752729
720	3	37046797	Intron 4-5	G	T	-	610	1	0.163934
721	3	37046812	Intron 4-5	G	A	-	10588	1.5	0.014167
722	3	37046816	Intron 4-5	A	C	-	2657	1	0.0376364
723	3	37046822	Intron 4-5	T	C	-	10588	1	0.00944465
724	3	37046860	Intron 4-5	C	T	-	10588	1	0.00944465
725	3	37046865	Intron 4-5	TAAAA	-	-	10588	1	0.00944465
726	3	37046867	Intron 4-5	-	AAAT	rs1043515058	10588	5	0.0472233
727	3	37046867	Intron 4-5	AAAT	-	-	10588	1	0.00944465
728	3	37046895	Intron 4-5	T	C	-	10588	1	0.00944465
729	3	37046914	Intron 4-5	C	T	-	10588	1.5	0.014167
730	3	37046942	Intron 4-5	A	T	-	2657	1	0.0376364
731	3	37046985	Intron 4-5	A	C	-	10588	4	0.0377786
732	3	37047002	Intron 4-5	C	T	rs1022642764	10588	1	0.00944465
733	3	37047003	Intron 4-5	G	C	-	2657	1	0.0376364
734	3	37047003	Intron 4-5	G	A	rs969678896	10588	1.5	0.014167
735	3	37047026	Intron 4-5	T	C	-	10588	1	0.00944465
736	3	37047029	Intron 4-5	C	A	-	10588	1	0.00944465
737	3	37047043	Intron 4-5	G	A	-	10588	1	0.00944465
738	3	37047054	Intron 4-5	A	G	-	10588	1.5	0.014167
739	3	37047082	Intron 4-5	C	G	-	10588	1	0.00944465
740	3	37047099	Intron 4-5	G	A	rs143959756	10588	1	0.00944465
741	3	37047165	Intron 4-5	G	T	-	10588	1	0.00944465
742	3	37047198	Intron 4-5	C	G	-	10588	1.5	0.014167
743	3	37047201	Intron 4-5	G	C	-	10588	1	0.00944465
744	3	37047205	Intron 4-5	A	G	-	13245	3	0.0226501
745	3	37047209	Intron 4-5	G	C	-	10588	2	0.0188893
746	3	37047216	Intron 4-5	TC	-	-	13245	2.5	0.018875
747	3	37047232	Intron 4-5	C	A	-	13245	2.5	0.018875
748	3	37047246	Intron 4-5	A	G	-	10588	1	0.00944465
749	3	37047251	Intron 4-5	C	T	-	10588	1	0.00944465
750	3	37047252	Intron 4-5	A	G	-	10588	1	0.00944465
751	3	37047271	Intron 4-5	G	T	-	13245	7	0.0528501
752	3	37047276	Intron 4-5	T	C	-	10588	1	0.00944465
753	3	37047276	Intron 4-5	T	-	-	610	1	0.163934
754	3	37047277	Intron 4-5	A	G	rs538371861	10588	1	0.00944465
755	3	37047298	Intron 4-5	C	G	-	10588	1	0.00944465
756	3	37047303	Intron 4-5	TGGA	-	-	13245	28.5	0.215176
757	3	37047315	Intron 4-5	T	C	rs745532828	10588	1	0.00944465
758	3	37047336	Intron 4-5	C	T	-	13245	7.5	0.0566251
759	3	37047368	Intron 4-5	T	C	-	2657	1	0.0376364
760	3	37047397	Intron 4-5	C	T	-	10588	1	0.00944465
761	3	37047406	Intron 4-5	C	T	-	10588	1	0.00944465
762	3	37047416	Intron 4-5	-	GA	-	13245	3	0.0226501
763	3	37047433	Intron 4-5	G	A	rs9871903	11885	10598	89.1712
764	3	37047480	Intron 4-5	G	A	-	10588	1	0.00944465
765	3	37047481	Intron 4-5	A	C	-	10588	1	0.00944465
766	3	37047483	Intron 4-5	C	T	-	10588	1	0.00944465
767	3	37047494	Intron 4-5	T	G	rs551260355	13333	24	0.180005
768	3	37047530	Intron 4-5	-	T	-	2657	2	0.0752729
769	3	37047547	Intron 4-5	G	C	-	10588	1	0.00944465
770	3	37047554	Intron 4-5	G	A	-	10588	2.5	0.0236116
771	3	37047561	Intron 4-5	C	T	rs112622280	13245	2	0.0151
772	3	37047562	Intron 4-5	G	A	rs987774180	10588	1	0.00944465
773	3	37047579	Intron 4-5	G	T	-	10588	1	0.00944465
774	3	37047583	Intron 4-5	A	G	rs12171282	13335	888.5	6.66292
775	3	37047588	Intron 4-5	C	G	rs191434410	10588	1	0.00944465
776	3	37047592	Intron 4-5	G	A	-	10588	1	0.00944465
777	3	37047595	Intron 4-5	C	T	-	10588	1	0.00944465
778	3	37047599	Intron 4-5	C	-	-	10588	1	0.00944465
779	3	37047607	Intron 4-5	C	T	rs1016611407	10588	2	0.0188893
780	3	37047608	Intron 4-5	G	A	rs552145386	13245	5	0.0377501
781	3	37047626	Intron 4-5	A	G	-	10588	1	0.00944465
782	3	37047636	Intron 4-5	C	T	-	10588	2.5	0.0236116
783	3	37047646	Intron 4-5	C	T	rs985579427	10588	1	0.00944465
784	3	37047655	Intron 4-5	G	A	-	10588	1	0.00944465
785	3	37047665	Intron 4-5	C	-	-	10588	1	0.00944465
786	3	37047667	Intron 4-5	G	A	rs371455333	10587	1	0.00944555
787	3	37047678	Intron 4-5	C	T	-	10588	1	0.00944465
788	3	37047711	Intron 4-5	C	T	rs151309005	610	1	0.163934
789	3	37047712	Intron 4-5	G	A	rs1044247689	13245	2	0.0151
790	3	37047733	Intron 4-5	G	A	-	10588	1	0.00944465
791	3	37047747	Intron 4-5	G	T	-	10588	1	0.00944465
792	3	37047777	Intron 4-5	G	A	rs113479434	13335	889.5	6.67042
793	3	37047790	Intron 4-5	A	G	-	10588	4	0.0377786
794	3	37047799	Intron 4-5	A	G	-	10588	1	0.00944465
795	3	37047814	Intron 4-5	C	T	rs145469315	10588	1	0.00944465
796	3	37047815	Intron 4-5	G	A	rs554036624	10588	1	0.00944465
797	3	37047820	Intron 4-5	G	A	rs545960466	10588	1	0.00944465
798	3	37047825	Intron 4-5	C	T	-	10588	1	0.00944465
799	3	37047868	Intron 4-5	A	G	rs910421384	13245	3	0.0226501
800	3	37047876	Intron 4-5	C	-	-	10588	1	0.00944465
801	3	37047895	Intron 4-5	G	A	-	13245	5.5	0.0415251
802	3	37047906	Intron 4-5	A	G	-	10588	1	0.00944465
803	3	37047926	Intron 4-5	G	A	-	13245	11.5	0.0868252
804	3	37047948	Intron 4-5	G	A	-	610	1	0.163934
805	3	37047965	Intron 4-5	A	G	-	10588	1	0.00944465
806	3	37047975	Intron 4-5	C	G	rs1038549141	13245	7	0.0528501
807	3	37047985	Intron 4-5	T	G	-	10588	1	0.00944465
808	3	37047999	Intron 4-5	G	C	-	10588	1	0.00944465
809	3	37048016	Intron 4-5	C	T	-	10588	1	0.00944465
810	3	37048043	Intron 4-5	T	C	-	10588	1	0.00944465
811	3	37048044	Intron 4-5	G	C	-	10588	1	0.00944465
812	3	37048067	Intron 4-5	C	T	rs4647241	10588	3.5	0.0330563
813	3	37048076	Intron 4-5	C	T	-	10588	4	0.0377786
814	3	37048091	Intron 4-5	G	A	-	2657	1	0.0376364
815	3	37048114	Intron 4-5	G	A	-	13245	25.5	0.192525
816	3	37048121	Intron 4-5	C	T	rs530354676	13245	2	0.0151
817	3	37048145	Intron 4-5	A	G	-	10588	1	0.00944465
818	3	37048200	Intron 4-5	G	A	-	10588	1	0.00944465
819	3	37048206	Intron 4-5	C	T	-	10588	1	0.00944465
820	3	37048208	Intron 4-5	C	T	rs553432341	10588	1	0.00944465
821	3	37048218	Intron 4-5	G	T	-	10588	1	0.00944465
822	3	37048273	Intron 4-5	C	T	rs4647242	10588	3.5	0.0330563
823	3	37048275	Intron 4-5	A	G	rs552257745	13245	79	0.596451
824	3	37048293	Intron 4-5	A	-	-	610	1	0.163934
825	3	37048312	Intron 4-5	T	C	-	10588	9.5	0.0897242
826	3	37048333	Intron 4-5	G	-	-	13245	5.5	0.0415251
827	3	37048335	Intron 4-5	G	T	-	10584	1	0.00944822
828	3	37048349	Intron 4-5	A	G	rs538252034	10588	1.5	0.014167
829	3	37048362	Intron 4-5	A	G	-	10588	1	0.00944465
830	3	37048363	Intron 4-5	TAAGA	-	-	10588	1	0.00944465
831	3	37048396	Intron 4-5	TA	-	-	10588	1	0.00944465
832	3	37048397	Intron 4-5	TA	-	-	4302	2	0.04649
833	3	37048401	Intron 4-5	G	A	rs1039956851	10588	1	0.00944465
834	3	37048410	Intron 4-5	-	T	-	18157	7	0.0385526
835	3	37048439	Intron 4-5	C	G	rs368847278	10588	1	0.00944465
836	3	37048441	Intron 4-5	A	G	rs4647245	14890	3	0.0201478
837	3	37048447	Intron 4-5	C	T	-	10588	1.5	0.014167
838	3	37048461	Intron 4-5	T	C	-	10588	1	0.00944465
839	3	37048468	Intron 4-5	T	C	rs1057522526	10588	2.5	0.0236116
840	3	37048574	Intron 5-6	G	T	rs759417195	4302	2	0.04649
841	3	37048579	Intron 5-6	A	G	rs4647246	14890	8.5	0.0570853
842	3	37048591	Intron 5-6	T	A	-	2657	1	0.0376364
843	3	37048633	Intron 5-6	A	G	rs4234259	18247	1621.5	8.88639
844	3	37048659	Intron 5-6	A	G	-	10588	1	0.00944465
845	3	37048669	Intron 5-6	G	C	-	10588	1	0.00944465
846	3	37048692	Intron 5-6	C	T	-	10588	1	0.00944465
847	3	37048702	Intron 5-6	G	C	-	10588	1	0.00944465
848	3	37048704	Intron 5-6	T	A	-	10588	1	0.00944465
849	3	37048709	Intron 5-6	G	T	-	2657	1	0.0376364
850	3	37048721	Intron 5-6	T	C	-	10588	1	0.00944465
851	3	37048733	Intron 5-6	A	G	-	10588	1	0.00944465
852	3	37048742	Intron 5-6	C	T	rs4647247	10588	3.5	0.0330563
853	3	37048796	Intron 5-6	A	G	-	13245	2.5	0.018875
854	3	37048814	Intron 5-6	T	C	rs552216680	13335	3	0.0224972
855	3	37048859	Intron 5-6	C	T	-	10588	1	0.00944465
856	3	37048866	Intron 5-6	G	C	rs55783879	10588	4	0.0377786
857	3	37048869	Intron 5-6	A	T	-	10588	1	0.00944465
858	3	37048871	Intron 5-6	T	C	-	10588	2	0.0188893
859	3	37048872	Intron 5-6	C	A	-	10588	1.5	0.014167
860	3	37048918	Intron 5-6	C	G	-	10588	1	0.00944465
861	3	37048931	Intron 5-6	T	A	-	10588	1	0.00944465
862	3	37048936	Intron 5-6	A	G	-	10588	1	0.00944465
863	3	37048948	Intron 5-6	-	C	-	10588	1	0.00944465
864	3	37048949	Intron 5-6	TACTTG	-	-	10588	1	0.00944465
865	3	37048969	Intron 5-6	A	C	-	10588	2	0.0188893
866	3	37049031	Intron 5-6	A	G	-	10588	1	0.00944465
867	3	37049040	Intron 5-6	G	A	-	10588	1.5	0.014167
868	3	37049040	Intron 5-6	G	T	-	10588	2.5	0.0236116
869	3	37049053	Intron 5-6	C	G	-	10588	1	0.00944465
870	3	37049093	Intron 5-6	T	G	rs988433743	10588	1	0.00944465
871	3	37049093	Intron 5-6	T	C	-	10588	1	0.00944465
872	3	37049098	Intron 5-6	T	C	rs4647250	13335	886	6.64417
873	3	37049105	Intron 5-6	C	T	-	13245	5	0.0377501
874	3	37049137	Intron 5-6	TCT	-	-	10588	1	0.00944465
875	3	37049164	Intron 5-6	-	TAAT	-	10588	1	0.00944465
876	3	37049166	Intron 5-6	A	C	-	10588	1	0.00944465
877	3	37049180	Intron 5-6	C	T	-	10588	1.5	0.014167
878	3	37049184	Intron 5-6	C	A	-	610	1	0.163934
879	3	37049192	Intron 5-6	G	C	rs189854985	10678	2	0.0187301
880	3	37049218	Intron 5-6	A	C	-	2657	1	0.0376364
881	3	37049219	Intron 5-6	A	G	rs573307277	10588	1.5	0.014167
882	3	37049223	Intron 5-6	A	C	-	10588	1	0.00944465
883	3	37049229	Intron 5-6	A	G	-	13245	6.5	0.0490751
884	3	37049230	Intron 5-6	G	T	-	610	1	0.163934
885	3	37049240	Intron 5-6	G	A	-	10588	1	0.00944465
886	3	37049250	Intron 5-6	C	T	rs554057450	13245	3	0.0226501
887	3	37049251	Intron 5-6	G	A	rs1019410269	10588	2	0.0188893
888	3	37049272	Intron 5-6	C	T	rs572437097	10588	4.5	0.0425009
889	3	37049284	Intron 5-6	A	G	-	610	1	0.163934
890	3	37049286	Intron 5-6	G	A	-	10588	1	0.00944465
891	3	37049291	Intron 5-6	G	A	-	10588	2.5	0.0236116
892	3	37049297	Intron 5-6	C	A	-	610	1	0.163934
893	3	37049298	Intron 5-6	G	A	rs776507899	10588	1	0.00944465
894	3	37049321	Intron 5-6	G	A	-	10588	1.5	0.014167
895	3	37049339	Intron 5-6	A	C	rs4647251	13335	111.5	0.836145
896	3	37049339	Intron 5-6	A	G	-	10588	2	0.0188893
897	3	37049365	Intron 5-6	A	C	-	10588	1	0.00944465
898	3	37049379	Intron 5-6	A	C	rs1038625691	10588	1	0.00944465
899	3	37049382	Intron 5-6	C	T	rs4647252	10588	1	0.00944465
900	3	37049383	Intron 5-6	G	A	rs539552609	10588	1.5	0.014167
901	3	37049387	Intron 5-6	T	C	-	2657	1	0.0376364
902	3	37049391	Intron 5-6	G	T	-	2657	1	0.0376364
903	3	37049447	Intron 5-6	C	T	rs4647253	10588	1	0.00944465
904	3	37049448	Intron 5-6	G	A	rs4647254	13245	11	0.0830502
905	3	37049519	Intron 5-6	G	T	-	10588	1	0.00944465
906	3	37049543	Intron 5-6	C	A	-	2657	1	0.0376364
907	3	37049557	Intron 5-6	T	C	-	10588	1	0.00944465
908	3	37049559	Intron 5-6	C	T	rs540501389	13245	2	0.0151
909	3	37049564	Intron 5-6	G	A	-	10588	1	0.00944465
910	3	37049564	Intron 5-6	G	T	-	10588	1	0.00944465
911	3	37049573	Intron 5-6	A	G	-	13245	4.5	0.0339751
912	3	37049575	Intron 5-6	G	A	rs150455495	10588	3.5	0.0330563
913	3	37049610	Intron 5-6	T	C	-	10588	1	0.00944465
914	3	37049655	Intron 5-6	C	T	-	10588	1	0.00944465
915	3	37049678	Intron 5-6	G	A	-	10588	1	0.00944465
916	3	37049681	Intron 5-6	G	A	-	10588	1	0.00944465
917	3	37049689	Intron 5-6	G	A	-	10588	1	0.00944465
918	3	37049713	Intron 5-6	A	G	rs973560358	10588	1	0.00944465
919	3	37049794	Intron 5-6	G	A	-	10588	1	0.00944465
920	3	37049823	Intron 5-6	G	C	-	10588	1	0.00944465
921	3	37049825	Intron 5-6	G	A	-	10588	1	0.00944465
922	3	37049848	Intron 5-6	G	A	rs1009743034	10588	2	0.0188893
923	3	37049864	Intron 5-6	C	G	-	10588	1	0.00944465
924	3	37049873	Intron 5-6	C	T	-	10588	1	0.00944465
925	3	37049880	Intron 5-6	A	C	-	2657	1	0.0376364
926	3	37049882	Intron 5-6	C	T	-	10588	1	0.00944465
927	3	37049888	Intron 5-6	C	T	rs182895018	13945	48	0.344209
928	3	37049890	Intron 5-6	C	A	-	610	1	0.163934
929	3	37049895	Intron 5-6	G	-	-	2657	4	0.150546
930	3	37049913	Intron 5-6	G	A	rs149859127	13245	2	0.0151
931	3	37049920	Intron 5-6	A	C	-	10588	1	0.00944465
932	3	37049964	Intron 5-6	A	G	-	2657	1	0.0376364
933	3	37049980	Intron 5-6	A	G	-	2657	1	0.0376364
934	3	37049999	Intron 5-6	A	G	-	10588	1	0.00944465
935	3	37050004	Intron 5-6	C	T	-	2657	1	0.0376364
936	3	37050004	Intron 5-6	TCTCCTG	-	-	10588	1	0.00944465
937	3	37050011	Intron 5-6	-	AA	-	10588	1	0.00944465
938	3	37050017	Intron 5-6	G	A	-	13245	23	0.17365
939	3	37050027	Intron 5-6	T	C	-	10588	1	0.00944465
940	3	37050038	Intron 5-6	T	C	-	10588	1	0.00944465
941	3	37050110	Intron 5-6	-	G	-	10588	1	0.00944465
942	3	37050133	Intron 5-6	T	C	-	10588	1	0.00944465
943	3	37050142	Intron 5-6	T	C	-	10588	1	0.00944465
944	3	37050152	Intron 5-6	G	C	-	13245	2	0.0151
945	3	37050155	Intron 5-6	T	G	-	10588	1	0.00944465
946	3	37050186	Intron 5-6	G	A	-	610	1	0.163934
947	3	37050199	Intron 5-6	A	G	rs1003250335	10588	1	0.00944465
948	3	37050210	Intron 5-6	T	A	-	10588	1	0.00944465
949	3	37050216	Intron 5-6	A	G	-	10588	1	0.00944465
950	3	37050229	Intron 5-6	G	A	-	10588	1	0.00944465
951	3	37050244	Intron 5-6	T	G	rs551392496	10588	2	0.0188893
952	3	37050248	Intron 5-6	G	A	-	4302	1	0.023245
953	3	37050249	Intron 5-6	G	A	rs563471879	14890	3	0.0201478
954	3	37050254	Intron 5-6	T	C	rs4647255	14890	13	0.0873069
955	3	37050263	Intron 5-6	G	C	-	10588	1	0.00944465
956	3	37050265	Intron 5-6	A	G	-	4302	1	0.023245
957	3	37050302	Intron 5-6	A	-	-	10588	1	0.00944465
958	3	37050410	Intron 6-7	T	C	-	10588	1	0.00944465
959	3	37050429	Intron 6-7	G	A	-	10588	1	0.00944465
960	3	37050437	Intron 6-7	A	G	rs761705807	10588	1	0.00944465
961	3	37050441	Intron 6-7	A	C	-	10588	1	0.00944465
962	3	37050445	Intron 6-7	A	C	-	610	1	0.163934
963	3	37050446	Intron 6-7	A	G	-	10588	1	0.00944465
964	3	37050452	Intron 6-7	T	A	-	10588	1	0.00944465
965	3	37050480	Intron 6-7	G	C	-	10588	1	0.00944465
966	3	37050521	Intron 6-7	C	G	-	2657	1	0.0376364
967	3	37050530	Intron 6-7	G	T	rs945756925	13245	7.5	0.0566251
968	3	37050547	Intron 6-7	G	A	-	2657	1	0.0376364
969	3	37050577	Intron 6-7	A	T	-	10588	1.5	0.014167
970	3	37050579	Intron 6-7	T	A	-	10588	1	0.00944465
971	3	37050584	Intron 6-7	C	G	-	2657	1	0.0376364
972	3	37050587	Intron 6-7	T	C	-	10588	1	0.00944465
973	3	37050592	Intron 6-7	C	T	rs541549265	13245	2	0.0151
974	3	37050642	Intron 6-7	G	A	rs145512141	13245	14	0.1057
975	3	37050647	Intron 6-7	A	G	-	10588	1	0.00944465
976	3	37050658	Intron 6-7	T	C	-	10588	1	0.00944465
977	3	37050707	Intron 6-7	G	C	-	2657	1	0.0376364
978	3	37050720	Intron 6-7	C	T	-	10588	1	0.00944465
979	3	37050724	Intron 6-7	G	A	-	610	1	0.163934
980	3	37050733	Intron 6-7	G	T	-	610	1	0.163934
981	3	37050734	Intron 6-7	G	C	-	10588	1	0.00944465
982	3	37050737	Intron 6-7	C	T	-	2657	1	0.0376364
983	3	37050742	Intron 6-7	C	T	-	10588	1	0.00944465
984	3	37050769	Intron 6-7	A	G	-	10588	1	0.00944465
985	3	37050782	Intron 6-7	TT	-	-	10588	1	0.00944465
986	3	37050794	Intron 6-7	G	T	-	2657	4	0.150546
987	3	37050801	Intron 6-7	T	A	-	10588	1	0.00944465
988	3	37050813	Intron 6-7	A	G	-	10588	1	0.00944465
989	3	37050818	Intron 6-7	C	T	-	10588	1	0.00944465
990	3	37050843	Intron 6-7	G	C	-	10588	5	0.0472233
991	3	37050864	Intron 6-7	C	T	-	10588	1	0.00944465
992	3	37050877	Intron 6-7	G	C	-	10588	1	0.00944465
993	3	37050882	Intron 6-7	A	C	rs528134649	10588	1	0.00944465
994	3	37050895	Intron 6-7	T	C	-	10588	1	0.00944465
995	3	37050949	Intron 6-7	G	A	-	10588	1	0.00944465
996	3	37050976	Intron 6-7	C	T	rs546292228	10678	3	0.0280951
997	3	37050977	Intron 6-7	G	T	-	10588	1	0.00944465
998	3	37050998	Intron 6-7	C	T	rs550579201	10588	1	0.00944465
999	3	37050998	Intron 6-7	C	G	-	10588	1	0.00944465
1000	3	37051042	Intron 6-7	C	T	rs1048434063	10588	1	0.00944465
1001	3	37051043	Intron 6-7	G	A	-	10588	4	0.0377786
1002	3	37051083	Intron 6-7	A	G	rs930343969	10588	1	0.00944465
1003	3	37051085	Intron 6-7	T	A	-	10588	1.5	0.014167
1004	3	37051105	Intron 6-7	TG	-	-	2657	6	0.225819
1005	3	37051123	Intron 6-7	A	T	-	2657	1	0.0376364
1006	3	37051125	Intron 6-7	G	A	-	2657	1	0.0376364
1007	3	37051131	Intron 6-7	-	TA	rs145136677	2657	254	9.55965
1008	3	37051131	Intron 6-7	TA	-	-	2657	2	0.0752729
1009	3	37051135	Intron 6-7	A	G	rs958181805	2657	1	0.0376364
1010	3	37051137	Intron 6-7	A	G	-	2657	1	0.0376364
1011	3	37051147	Intron 6-7	G	A	-	2657	1	0.0376364
1012	3	37051149	Intron 6-7	G	T	-	2657	1	0.0376364
1013	3	37051149	Intron 6-7	TATATA	-	-	2657	2	0.0752729
1014	3	37051173	Intron 6-7	A	G	rs75217945	2657	23	0.865638
1015	3	37051174	Intron 6-7	T	C	-	2657	1	0.0376364
1016	3	37051179	Intron 6-7	TATATGTATATATTTA	-	-	2657	1	0.0376364
1017	3	37051193	Intron 6-7	TATA	-	-	2657	10	0.376364
1018	3	37051195	Intron 6-7	TATATG	-	-	2657	1	0.0376364
1019	3	37051203	Intron 6-7	TATG	-	-	2657	38	1.43018
1020	3	37051207	Intron 6-7	-	TA	-	2657	1	0.0376364
1021	3	37051217	Intron 6-7	TATATG	-	-	2657	71	2.67219
1022	3	37051227	Intron 6-7	A	G	rs535095883	2657	3	0.112909
1023	3	37051229	Intron 6-7	TA	-	-	2657	23	0.865638
1024	3	37051259	Intron 6-7	A	G	rs113528544	2657	1	0.0376364
1025	3	37051289	Intron 6-7	-	TA	-	2657	2	0.0752729
1026	3	37051291	Intron 6-7	A	G	rs563746936	2657	1	0.0376364
1027	3	37051301	Intron 6-7	-	T	rs940109760	2657	8	0.301091
1028	3	37051301	Intron 6-7	A	T	rs549379211	2657	3	0.112909
1029	3	37051303	Intron 6-7	T	A	rs189512089	2657	8	0.301091
1030	3	37051316	Intron 6-7	G	A	rs560701925	10588	1	0.00944465
1031	3	37051324	Intron 6-7	G	A	rs140341411	10588	1.5	0.014167
1032	3	37051357	Intron 6-7	G	A	rs181781959	10588	2.5	0.0236116
1033	3	37051397	Intron 6-7	G	A	-	13245	8.5	0.0641752
1034	3	37051398	Intron 6-7	A	G	-	13245	6.5	0.0490751
1035	3	37051406	Intron 6-7	G	A	rs932244106	13245	17.5	0.132125
1036	3	37051419	Intron 6-7	G	A	-	10588	1	0.00944465
1037	3	37051421	Intron 6-7	G	T	-	10588	1	0.00944465
1038	3	37051440	Intron 6-7	C	T	-	10588	1	0.00944465
1039	3	37051454	Intron 6-7	C	T	rs952638399	2657	1	0.0376364
1040	3	37051459	Intron 6-7	T	-	-	2657	1	0.0376364
1041	3	37051470	Intron 6-7	-	T	-	2657	2	0.0752729
1042	3	37051484	Intron 6-7	G	A	-	10588	1.5	0.014167
1043	3	37051488	Intron 6-7	G	A	rs894028652	10588	1	0.00944465
1044	3	37051522	Intron 6-7	A	T	-	10588	1.5	0.014167
1045	3	37051542	Intron 6-7	T	C	rs9837574	10588	3.5	0.0330563
1046	3	37051546	Intron 6-7	T	C	rs9837578	10588	3.5	0.0330563
1047	3	37051548	Intron 6-7	C	T	-	10588	1	0.00944465
1048	3	37051570	Intron 6-7	G	C	rs376738086	10588	1	0.00944465
1049	3	37051582	Intron 6-7	G	T	-	13245	2	0.0151
1050	3	37051614	Intron 6-7	TTTTTTTTTTTTTTTT	-	-	2657	2	0.0752729
1051	3	37051666	Intron 6-7	C	A	-	13330	99	0.742686
1052	3	37051667	Intron 6-7	A	C	rs9855475	13939	1161	8.32915
1053	3	37051695	Intron 6-7	G	A	rs553629531	2657	1	0.0376364
1054	3	37051697	Intron 6-7	C	G	-	10588	1	0.00944465
1055	3	37051702	Intron 6-7	C	T	-	10588	1	0.00944465
1056	3	37051703	Intron 6-7	G	A	rs563597150	10588	1	0.00944465
1057	3	37051706	Intron 6-7	A	G	-	10588	1	0.00944465
1058	3	37051712	Intron 6-7	A	G	-	10588	3	0.028334
1059	3	37051717	Intron 6-7	C	G	-	10588	1	0.00944465
1060	3	37051724	Intron 6-7	C	G	-	10588	1	0.00944465
1061	3	37051734	Intron 6-7	G	T	-	10588	1	0.00944465
1062	3	37051745	Intron 6-7	C	T	-	10588	1	0.00944465
1063	3	37051755	Intron 6-7	T	C	-	10588	1	0.00944465
1064	3	37051767	Intron 6-7	C	T	-	13245	2.5	0.018875
1065	3	37051788	Intron 6-7	G	A	rs797007489	13245	6.5	0.0490751
1066	3	37051804	Intron 6-7	-	GCTTTGTCTTTAGCATGTAGATCTATAATATACTTGTCATA	-	597	1	0.167504
1067	3	37051818	Intron 6-7	G	A	rs554099458	2657	1	0.0376364
1068	3	37051826	Intron 6-7	A	G	-	10588	1	0.00944465
1069	3	37051838	Intron 6-7	C	T	rs532668113	10588	2	0.0188893
1070	3	37051867	Intron 6-7	C	A	-	10588	5.5	0.0519456
1071	3	37051872	Intron 6-7	C	T	-	10588	1	0.00944465
1072	3	37051875	Intron 6-7	C	A	rs200237567	13245	7.5	0.0566251
1073	3	37051887	Intron 6-7	G	A	rs111341959	10588	3.5	0.0330563
1074	3	37051939	Intron 6-7	T	A	-	610	1	0.163934
1075	3	37051942	Intron 6-7	A	-	-	10588	1	0.00944465
1076	3	37051951	Intron 6-7	T	C	rs115987957	10588	2	0.0188893
1077	3	37051975	Intron 6-7	-	T	-	10588	1	0.00944465
1078	3	37051982	Intron 6-7	G	A	rs17035877	10588	3.5	0.0330563
1079	3	37052033	Intron 6-7	TT	-	-	2657	5	0.188182
1080	3	37052067	Intron 6-7	T	C	rs548243719	10588	1	0.00944465
1081	3	37052070	Intron 6-7	T	C	rs113956733	13335	889.5	6.67042
1082	3	37052073	Intron 6-7	C	T	-	10588	1	0.00944465
1083	3	37052091	Intron 6-7	G	A	-	2657	1	0.0376364
1084	3	37052094	Intron 6-7	C	T	-	10588	6.5	0.0613903
1085	3	37052100	Intron 6-7	C	G	-	2657	1	0.0376364
1086	3	37052100	Intron 6-7	C	T	rs186483472	13245	26.5	0.200076
1087	3	37052102	Intron 6-7	CT	-	-	10588	1	0.00944465
1088	3	37052103	Intron 6-7	C	T	-	2657	1	0.0376364
1089	3	37052107	Intron 6-7	CACA	-	-	10588	1	0.00944465
1090	3	37052159	Intron 6-7	T	C	-	2657	1	0.0376364
1091	3	37052165	Intron 6-7	G	A	-	10588	1	0.00944465
1092	3	37052191	Intron 6-7	C	T	rs968013461	2657	10	0.376364
1093	3	37052240	Intron 6-7	C	G	-	10588	1	0.00944465
1094	3	37052262	Intron 6-7	G	A	rs544674848	10588	1	0.00944465
1095	3	37052264	Intron 6-7	A	C	-	10588	1	0.00944465
1096	3	37052285	Intron 6-7	G	T	-	10588	3	0.028334
1097	3	37052287	Intron 6-7	C	T	-	10588	2	0.0188893
1098	3	37052321	Intron 6-7	C	T	-	10588	1	0.00944465
1099	3	37052328	Intron 6-7	C	T	-	13245	5	0.0377501
1100	3	37052338	Intron 6-7	G	A	rs1037113851	10588	1	0.00944465
1101	3	37052384	Intron 6-7	C	A	rs554570505	10588	1	0.00944465
1102	3	37052386	Intron 6-7	T	G	-	10588	1	0.00944465
1103	3	37052394	Intron 6-7	T	-	-	2657	1	0.0376364
1104	3	37052455	Intron 6-7	A	G	-	10588	1	0.00944465
1105	3	37052477	Intron 6-7	C	T	-	10588	1	0.00944465
1106	3	37052478	Intron 6-7	A	C	rs558420430	13245	2	0.0151
1107	3	37052485	Intron 6-7	C	T	rs897688434	10588	1.5	0.014167
1108	3	37052492	Intron 6-7	C	T	-	10588	1	0.00944465
1109	3	37052520	Intron 6-7	C	T	-	13245	3.5	0.0264251
1110	3	37052522	Intron 6-7	C	T	-	2657	1	0.0376364
1111	3	37052533	Intron 6-7	A	C	-	10588	1	0.00944465
1112	3	37052564	Intron 6-7	G	A	-	10588	1	0.00944465
1113	3	37052578	Intron 6-7	A	G	-	10588	1	0.00944465
1114	3	37052592	Intron 6-7	C	T	-	10588	1	0.00944465
1115	3	37052593	Intron 6-7	A	C	-	2657	1	0.0376364
1116	3	37052599	Intron 6-7	A	G	-	10588	1	0.00944465
1117	3	37052602	Intron 6-7	G	A	-	10588	1	0.00944465
1118	3	37052613	Intron 6-7	G	A	-	10588	1	0.00944465
1119	3	37052641	Intron 6-7	C	T	-	10588	1	0.00944465
1120	3	37052644	Intron 6-7	C	T	rs183691568	10588	1	0.00944465
1121	3	37052657	Intron 6-7	T	A	-	10588	1	0.00944465
1122	3	37052702	Intron 6-7	G	A	-	10588	1	0.00944465
1123	3	37052719	Intron 6-7	-	GA	-	10588	1	0.00944465
1124	3	37052731	Intron 6-7	C	T	rs560230038	2657	1	0.0376364
1125	3	37052736	Intron 6-7	G	A	rs781251481	10588	1	0.00944465
1126	3	37052748	Intron 6-7	A	G	-	10588	1	0.00944465
1127	3	37052771	Intron 6-7	G	A	-	10588	4.5	0.0425009
1128	3	37052778	Intron 6-7	A	G	-	597	1	0.167504
1129	3	37052779	Intron 6-7	C	T	-	10588	1	0.00944465
1130	3	37052789	Intron 6-7	G	A	-	10588	1	0.00944465
1131	3	37052804	Intron 6-7	C	G	-	13245	2	0.0151
1132	3	37052815	Intron 6-7	T	A	-	13245	3	0.0226501
1133	3	37052834	Intron 6-7	C	T	-	10588	1	0.00944465
1134	3	37052843	Intron 6-7	C	T	-	2657	1	0.0376364
1135	3	37052848	Intron 6-7	A	T	-	10588	1	0.00944465
1136	3	37052851	Intron 6-7	-	CC	-	10588	1	0.00944465
1137	3	37052852	Intron 6-7	T	A	rs550926469	10587	1	0.00944555
1138	3	37052857	Intron 6-7	T	C	-	10588	1	0.00944465
1139	3	37052869	Intron 6-7	C	T	rs1031966889	10588	1	0.00944465
1140	3	37052874	Intron 6-7	G	A	rs113778406	10588	3.5	0.0330563
1141	3	37052878	Intron 6-7	A	G	rs548138312	13245	29	0.218951
1142	3	37052906	Intron 6-7	C	T	rs376499678	2657	1	0.0376364
1143	3	37052929	Intron 6-7	GGC	-	-	10588	1.5	0.014167
1144	3	37052933	Intron 6-7	G	A	rs192955168	13335	48.5	0.363705
1145	3	37052938	Intron 6-7	T	A	-	10588	1	0.00944465
1146	3	37052947	Intron 6-7	G	A	-	10588	1.5	0.014167
1147	3	37052978	Intron 6-7	G	T	-	13245	2	0.0151
1148	3	37053039	Intron 6-7	G	A	rs115050713	10588	2.5	0.0236116
1149	3	37053054	Intron 6-7	C	G	rs895454615	10588	1	0.00944465
1150	3	37053075	Intron 6-7	A	G	-	10588	1	0.00944465
1151	3	37053105	Intron 6-7	T	-	-	10588	1	0.00944465
1152	3	37053110	Intron 6-7	G	A	-	10588	1	0.00944465
1153	3	37053111	Intron 6-7	C	G	-	10588	2	0.0188893
1154	3	37053115	Intron 6-7	T	C	-	10588	1	0.00944465
1155	3	37053120	Intron 6-7	T	C	rs13320360	10588	3.5	0.0330563
1156	3	37053143	Intron 6-7	A	G	rs772710669	10588	1	0.00944465
1157	3	37053145	Intron 6-7	T	G	-	10588	1	0.00944465
1158	3	37053158	Intron 6-7	A	G	-	2657	1	0.0376364
1159	3	37053189	Intron 6-7	C	A	-	10588	1	0.00944465
1160	3	37053200	Intron 6-7	C	G	-	10588	1	0.00944465
1161	3	37053211	Intron 6-7	A	G	-	10588	1	0.00944465
1162	3	37053219	Intron 6-7	A	G	rs540535244	13855	47.5	0.342837
1163	3	37053220	Intron 6-7	C	T	-	10588	1	0.00944465
1164	3	37053261	Intron 6-7	G	T	-	10588	1	0.00944465
1165	3	37053271	Intron 6-7	T	C	rs56128606	14890	2.5	0.0167898
1166	3	37053272	Intron 6-7	T	C	-	10588	1	0.00944465
1167	3	37053383	Intron 7-8	T	C	-	10588	1	0.00944465
1168	3	37053402	Intron 7-8	A	G	-	10588	1	0.00944465
1169	3	37053414	Intron 7-8	A	G	-	2657	1	0.0376364
1170	3	37053429	Intron 7-8	A	T	-	10588	1	0.00944465
1171	3	37053430	Intron 7-8	G	C	-	10588	1	0.00944465
1172	3	37053450	Intron 7-8	G	C	-	11198	5.5	0.0491159
1173	3	37053459	Intron 7-8	A	G	rs370187296	10588	1.5	0.014167
1174	3	37053461	Intron 7-8	G	C	rs201209377	4302	2	0.04649
1175	3	37053489	Intron 7-8	G	A	rs757462513	610	1	0.163934
1176	3	37053493	Intron 7-8	G	T	rs566497442	4302	2	0.04649
1177	3	37053624	Intron 8-9	C	T	-	10588	1	0.00944465
1178	3	37053629	Intron 8-9	A	G	-	10588	1	0.00944465
1179	3	37053674	Intron 8-9	A	G	-	10588	1	0.00944465
1180	3	37053734	Intron 8-9	G	C	rs934464100	10588	1	0.00944465
1181	3	37053739	Intron 8-9	G	A	-	10588	1	0.00944465
1182	3	37053760	Intron 8-9	C	T	rs916995833	10588	1	0.00944465
1183	3	37053761	Intron 8-9	G	A	rs4647259	13245	16	0.1208
1184	3	37053791	Intron 8-9	T	C	-	10588	1	0.00944465
1185	3	37053792	Intron 8-9	C	T	-	2657	1	0.0376364
1186	3	37053806	Intron 8-9	C	T	rs765547744	10588	1	0.00944465
1187	3	37053807	Intron 8-9	G	A	rs111933765	13855	106.5	0.768676
1188	3	37053811	Intron 8-9	A	G	rs570732999	2657	1	0.0376364
1189	3	37053813	Intron 8-9	AT	-	-	10588	1.5	0.014167
1190	3	37053832	Intron 8-9	T	C	-	10588	1	0.00944465
1191	3	37053840	Intron 8-9	G	C	-	10588	2	0.0188893
1192	3	37053848	Intron 8-9	TA	-	-	13245	3	0.0226501
1193	3	37053857	Intron 8-9	A	G	rs1057360053	2657	1	0.0376364
1194	3	37053861	Intron 8-9	G	C	-	13245	13.5	0.101925
1195	3	37053874	Intron 8-9	C	T	-	10588	1	0.00944465
1196	3	37053879	Intron 8-9	A	G	rs557515130	13245	8	0.0604002
1197	3	37053897	Intron 8-9	G	A	rs200790688	13245	3.5	0.0264251
1198	3	37053928	Intron 8-9	C	T	-	10588	1	0.00944465
1199	3	37053938	Intron 8-9	A	G	-	10588	1	0.00944465
1200	3	37053943	Intron 8-9	A	G	-	10588	1	0.00944465
1201	3	37053956	Intron 8-9	G	T	-	10588	1	0.00944465
1202	3	37053963	Intron 8-9	A	G	rs183794010	13245	3.5	0.0264251
1203	3	37053963	Intron 8-9	A	T	-	13245	4.5	0.0339751
1204	3	37053964	Intron 8-9	T	C	-	10588	1	0.00944465
1205	3	37053972	Intron 8-9	G	C	-	10588	1	0.00944465
1206	3	37054032	Intron 8-9	A	G	-	10588	1	0.00944465
1207	3	37054038	Intron 8-9	G	A	rs955893863	10588	1	0.00944465
1208	3	37054047	Intron 8-9	A	T	-	10588	1	0.00944465
1209	3	37054049	Intron 8-9	T	C	-	10588	1	0.00944465
1210	3	37054069	Intron 8-9	A	C	-	10588	1	0.00944465
1211	3	37054073	Intron 8-9	G	A	-	13245	11.5	0.0868252
1212	3	37054089	Intron 8-9	G	A	-	10588	1	0.00944465
1213	3	37054123	Intron 8-9	A	C	-	10588	1	0.00944465
1214	3	37054123	Intron 8-9	A	G	-	10588	1	0.00944465
1215	3	37054159	Intron 8-9	G	A	rs1044512058	10588	2	0.0188893
1216	3	37054172	Intron 8-9	T	C	-	10588	1	0.00944465
1217	3	37054187	Intron 8-9	G	C	-	10588	1	0.00944465
1218	3	37054189	Intron 8-9	C	T	-	10588	1	0.00944465
1219	3	37054196	Intron 8-9	A	G	-	10588	1	0.00944465
1220	3	37054221	Intron 8-9	C	G	-	2657	2	0.0752729
1221	3	37054243	Intron 8-9	T	C	-	2657	2	0.0752729
1222	3	37054258	Intron 8-9	C	T	-	10588	1	0.00944465
1223	3	37054296	Intron 8-9	A	G	-	610	1	0.163934
1224	3	37054304	Intron 8-9	A	-	-	10588	1	0.00944465
1225	3	37054327	Intron 8-9	G	A	-	10588	1	0.00944465
1226	3	37054355	Intron 8-9	C	A	rs531584544	13245	9.5	0.0717252
1227	3	37054357	Intron 8-9	G	C	-	10588	1	0.00944465
1228	3	37054369	Intron 8-9	A	G	-	2657	5	0.188182
1229	3	37054391	Intron 8-9	TTTTCT	-	-	2657	1	0.0376364
1230	3	37054397	Intron 8-9	TTTTC	-	-	2657	1	0.0376364
1231	3	37054427	Intron 8-9	G	A	-	10588	1	0.00944465
1232	3	37054446	Intron 8-9	G	A	-	10588	2.5	0.0236116
1233	3	37054447	Intron 8-9	C	T	-	13245	4	0.0302001
1234	3	37054460	Intron 8-9	G	A	rs185693197	10588	2	0.0188893
1235	3	37054478	Intron 8-9	G	A	-	10588	1	0.00944465
1236	3	37054486	Intron 8-9	C	T	rs535629400	2657	1	0.0376364
1237	3	37054487	Intron 8-9	G	A	rs554036303	90	1	1.11111
1238	3	37054493	Intron 8-9	C	T	-	10588	3	0.028334
1239	3	37054494	Intron 8-9	G	A	rs903883743	10588	1.5	0.014167
1240	3	37054501	Intron 8-9	C	T	rs1001267910	10588	1	0.00944465
1241	3	37054510	Intron 8-9	C	T	-	13245	3	0.0226501
1242	3	37054545	Intron 8-9	C	T	rs1024160300	13245	2.5	0.018875
1243	3	37054557	Intron 8-9	C	T	-	13245	4	0.0302001
1244	3	37054591	Intron 8-9	C	T	rs963217334	10588	1	0.00944465
1245	3	37054592	Intron 8-9	G	A	-	10588	1	0.00944465
1246	3	37054601	Intron 8-9	T	C	rs4647260	13335	891.5	6.68541
1247	3	37054602	Intron 8-9	C	A	-	10588	1	0.00944465
1248	3	37054603	Intron 8-9	G	A	rs973711294	10588	1	0.00944465
1249	3	37054607	Intron 8-9	T	A	-	10588	1	0.00944465
1250	3	37054611	Intron 8-9	C	G	-	10588	1	0.00944465
1251	3	37054646	Intron 8-9	C	T	-	10588	1	0.00944465
1252	3	37054650	Intron 8-9	C	G	-	10588	1	0.00944465
1253	3	37054664	Intron 8-9	G	C	-	10588	1.5	0.014167
1254	3	37054669	Intron 8-9	G	A	-	10588	1.5	0.014167
1255	3	37054681	Intron 8-9	G	T	-	10588	1	0.00944465
1256	3	37054691	Intron 8-9	G	A	rs1031017549	10588	1	0.00944465
1257	3	37054723	Intron 8-9	A	G	-	10588	1	0.00944465
1258	3	37054726	Intron 8-9	A	C	-	10588	1	0.00944465
1259	3	37054741	Intron 8-9	A	G	rs375676682	2657	1	0.0376364
1260	3	37054757	Intron 8-9	G	A	rs980338897	13245	2.5	0.018875
1261	3	37054781	Intron 8-9	T	C	-	10588	1	0.00944465
1262	3	37054847	Intron 8-9	T	C	rs550232457	13245	2.5	0.018875
1263	3	37054855	Intron 8-9	A	G	-	10588	1	0.00944465
1264	3	37054862	Intron 8-9	A	G	-	10588	1	0.00944465
1265	3	37054902	Intron 8-9	A	G	-	10588	1	0.00944465
1266	3	37054946	Intron 8-9	A	T	-	2657	1	0.0376364
1267	3	37054971	Intron 8-9	C	T	rs892496550	13245	3.5	0.0264251
1268	3	37054978	Intron 8-9	T	G	-	13245	8	0.0604002
1269	3	37054990	Intron 8-9	A	G	-	10588	1	0.00944465
1270	3	37055034	Intron 8-9	C	T	rs539492192	2657	1	0.0376364
1271	3	37055045	Intron 8-9	T	C	rs371974506	13245	7.5	0.0566251
1272	3	37055053	Intron 8-9	C	G	-	10588	1	0.00944465
1273	3	37055058	Intron 8-9	A	G	rs925463869	10588	1.5	0.014167
1274	3	37055073	Intron 8-9	T	C	rs554992537	10678	2	0.0187301
1275	3	37055077	Intron 8-9	A	G	rs886244947	10588	1.5	0.014167
1276	3	37055150	Intron 8-9	A	G	-	2657	1	0.0376364
1277	3	37055164	Intron 8-9	C	T	rs116302479	10588	1	0.00944465
1278	3	37055172	Intron 8-9	A	G	-	2657	1	0.0376364
1279	3	37055174	Intron 8-9	T	A	-	10588	1	0.00944465
1280	3	37055261	Intron 8-9	G	A	-	10588	1	0.00944465
1281	3	37055264	Intron 8-9	C	G	-	10588	1	0.00944465
1282	3	37055267	Intron 8-9	GAA	-	-	10588	1	0.00944465
1283	3	37055268	Intron 8-9	G	A	-	10588	1	0.00944465
1284	3	37055294	Intron 8-9	G	A	-	10588	1	0.00944465
1285	3	37055341	Intron 8-9	C	A	-	10588	1	0.00944465
1286	3	37055352	Intron 8-9	G	A	-	10588	1	0.00944465
1287	3	37055353	Intron 8-9	A	G	-	13245	2	0.0151
1288	3	37055377	Intron 8-9	A	G	rs188555584	2747	4	0.145613
1289	3	37055393	Intron 8-9	C	T	-	10588	1	0.00944465
1290	3	37055432	Intron 8-9	C	G	-	10588	1	0.00944465
1291	3	37055436	Intron 8-9	A	T	rs181092654	13335	30	0.224972
1292	3	37055459	Intron 8-9	C	T	-	10588	1	0.00944465
1293	3	37055472	Intron 8-9	C	G	rs543833459	13245	3	0.0226501
1294	3	37055476	Intron 8-9	T	C	-	2657	1	0.0376364
1295	3	37055525	Intron 8-9	G	A	-	13245	31	0.234051
1296	3	37055562	Intron 8-9	C	G	-	13245	11.5	0.0868252
1297	3	37055562	Intron 8-9	C	A	-	10588	1	0.00944465
1298	3	37055578	Intron 8-9	A	T	-	10588	4	0.0377786
1299	3	37055585	Intron 8-9	C	T	-	10588	1	0.00944465
1300	3	37055628	Intron 8-9	C	G	-	10588	1	0.00944465
1301	3	37055630	Intron 8-9	T	C	-	10588	1	0.00944465
1302	3	37055665	Intron 8-9	A	T	-	10586	2	0.0188929
1303	3	37055682	Intron 8-9	-	GTGG	-	2657	1	0.0376364
1304	3	37055682	Intron 8-9	-	GTGGGTGAGTGG	-	2657	1	0.0376364
1305	3	37055690	Intron 8-9	G	A	rs148512611	90	1	1.11111
1306	3	37055695	Intron 8-9	TGGGTGGGTGGATGGATGGATGGGAGGA	-	-	2657	1	0.0376364
1307	3	37055699	Intron 8-9	G	A	-	2657	1	0.0376364
1308	3	37055703	Intron 8-9	-	TGGATGGA	-	2657	2	0.0752729
1309	3	37055711	Intron 8-9	A	G	rs534940572	2657	3	0.112909
1310	3	37055728	Intron 8-9	T	C	-	2657	1	0.0376364
1311	3	37055752	Intron 8-9	T	C	-	10588	1	0.00944465
1312	3	37055759	Intron 8-9	A	G	-	10588	1	0.00944465
1313	3	37055802	Intron 8-9	C	T	-	10588	1	0.00944465
1314	3	37055816	Intron 8-9	C	G	-	10588	1	0.00944465
1315	3	37055818	Intron 8-9	C	T	-	10588	1	0.00944465
1316	3	37055822	Intron 8-9	G	A	rs559465264	13245	9	0.0679502
1317	3	37055852	Intron 8-9	T	A	-	10588	1	0.00944465
1318	3	37055855	Intron 8-9	T	-	-	10588	1	0.00944465
1319	3	37055864	Intron 8-9	T	-	-	10588	1	0.00944465
1320	3	37055868	Intron 8-9	T	G	-	6959	3	0.0431096
1321	3	37055892	Intron 8-9	T	G	-	10588	1	0.00944465
1322	3	37055895	Intron 8-9	A	-	-	4302	1	0.023245
1323	3	37056045	Intron 9-10	A	G	rs182733777	4302	1	0.023245
1324	3	37056050	Intron 9-10	-	C	rs757064565	17547	5	0.0284949
1325	3	37056055	Intron 9-10	A	G	rs774777889	10588	1	0.00944465
1326	3	37056072	Intron 9-10	A	G	-	10588	1	0.00944465
1327	3	37056089	Intron 9-10	A	G	rs1009214785	10588	1	0.00944465
1328	3	37056110	Intron 9-10	A	G	rs371196742	4302	4	0.09298
1329	3	37056121	Intron 9-10	C	G	-	10588	1	0.00944465
1330	3	37056131	Intron 9-10	A	C	-	10588	1	0.00944465
1331	3	37056140	Intron 9-10	G	A	-	610	1	0.163934
1332	3	37056141	Intron 9-10	G	A	-	13245	2	0.0151
1333	3	37056185	Intron 9-10	A	C	-	10588	1	0.00944465
1334	3	37056217	Intron 9-10	C	T	-	10588	1	0.00944465
1335	3	37056227	Intron 9-10	C	T	-	10588	1	0.00944465
1336	3	37056230	Intron 9-10	T	C	-	10588	1	0.00944465
1337	3	37056250	Intron 9-10	C	T	-	10587	1	0.00944555
1338	3	37056251	Intron 9-10	T	C	rs780881603	10588	1	0.00944465
1339	3	37056269	Intron 9-10	G	A	-	610	1	0.163934
1340	3	37056287	Intron 9-10	A	T	-	10588	1	0.00944465
1341	3	37056301	Intron 9-10	C	G	-	10588	1	0.00944465
1342	3	37056313	Intron 9-10	G	A	-	10588	1	0.00944465
1343	3	37056367	Intron 9-10	T	A	-	10588	1	0.00944465
1344	3	37056403	Intron 9-10	G	A	rs116834614	10588	1	0.00944465
1345	3	37056423	Intron 9-10	A	G	-	10588	1.5	0.014167
1346	3	37056433	Intron 9-10	C	-	-	10588	1	0.00944465
1347	3	37056468	Intron 9-10	C	T	-	10588	1	0.00944465
1348	3	37056557	Intron 9-10	C	T	-	10588	1	0.00944465
1349	3	37056586	Intron 9-10	T	C	rs983188210	10588	1	0.00944465
1350	3	37056622	Intron 9-10	T	C	-	2657	1	0.0376364
1351	3	37056642	Intron 9-10	A	G	rs911834386	10588	1.5	0.014167
1352	3	37056679	Intron 9-10	C	A	-	10588	1	0.00944465
1353	3	37056681	Intron 9-10	A	G	-	10588	1	0.00944465
1354	3	37056682	Intron 9-10	CAA	-	-	10588	1	0.00944465
1355	3	37056689	Intron 9-10	C	T	-	10588	1	0.00944465
1356	3	37056692	Intron 9-10	G	C	-	10588	1	0.00944465
1357	3	37056698	Intron 9-10	CAAA	-	-	2657	1	0.0376364
1358	3	37056700	Intron 9-10	A	G	-	2657	1	0.0376364
1359	3	37056701	Intron 9-10	AC	-	-	13245	7.5	0.0566251
1360	3	37056705	Intron 9-10	C	T	rs369302525	13245	15	0.11325
1361	3	37056710	Intron 9-10	T	G	-	13245	43	0.324651
1362	3	37056725	Intron 9-10	C	G	-	10588	1	0.00944465
1363	3	37056758	Intron 9-10	G	A	rs543942780	10588	1	0.00944465
1364	3	37056766	Intron 9-10	A	G	-	10588	4	0.0377786
1365	3	37056784	Intron 9-10	C	T	-	10588	1	0.00944465
1366	3	37056787	Intron 9-10	A	C	-	13245	2	0.0151
1367	3	37056804	Intron 9-10	A	G	-	10588	1	0.00944465
1368	3	37056827	Intron 9-10	T	A	-	10588	1	0.00944465
1369	3	37056865	Intron 9-10	A	G	-	10588	1	0.00944465
1370	3	37056900	Intron 9-10	C	A	-	10588	1	0.00944465
1371	3	37056904	Intron 9-10	C	A	-	10588	1	0.00944465
1372	3	37056909	Intron 9-10	A	C	-	10588	1	0.00944465
1373	3	37056914	Intron 9-10	T	C	rs574099691	2657	1	0.0376364
1374	3	37056924	Intron 9-10	G	C	-	10588	2	0.0188893
1375	3	37056931	Intron 9-10	T	C	-	10588	1	0.00944465
1376	3	37056938	Intron 9-10	A	G	-	10588	1	0.00944465
1377	3	37056939	Intron 9-10	G	C	-	10588	1	0.00944465
1378	3	37056978	Intron 9-10	G	A	-	2657	1	0.0376364
1379	3	37056990	Intron 9-10	C	A	rs1558528	13335	888.5	6.66292
1380	3	37057041	Intron 9-10	G	C	-	10588	1	0.00944465
1381	3	37057057	Intron 9-10	G	A	rs3774340	10588	1	0.00944465
1382	3	37057109	Intron 9-10	T	G	-	10588	2.5	0.0236116
1383	3	37057179	Intron 9-10	A	G	rs546602134	13335	43	0.32246
1384	3	37057181	Intron 9-10	T	C	rs4647265	10678	11.5	0.107698
1385	3	37057186	Intron 9-10	G	C	-	10588	1	0.00944465
1386	3	37057190	Intron 9-10	T	C	-	10588	1	0.00944465
1387	3	37057192	Intron 9-10	C	T	-	2657	1	0.0376364
1388	3	37057199	Intron 9-10	G	A	rs182561698	10588	1	0.00944465
1389	3	37057208	Intron 9-10	C	G	-	10588	1	0.00944465
1390	3	37057210	Intron 9-10	G	A	-	10588	1.5	0.014167
1391	3	37057227	Intron 9-10	G	C	-	10588	1	0.00944465
1392	3	37057253	Intron 9-10	T	G	-	10588	1	0.00944465
1393	3	37057254	Intron 9-10	A	G	-	2657	1	0.0376364
1394	3	37057274	Intron 9-10	C	T	-	10588	1	0.00944465
1395	3	37057297	Intron 9-10	G	C	-	10588	1	0.00944465
1396	3	37057303	Intron 9-10	C	T	-	10588	1	0.00944465
1397	3	37057305	Intron 9-10	C	T	-	10588	1.5	0.014167
1398	3	37057306	Intron 9-10	T	-	-	610	1	0.163934
1399	3	37057309	Intron 9-10	C	G	rs187113730	10588	1	0.00944465
1400	3	37057310	Intron 9-10	G	A	rs4647266	10588	3.5	0.0330563
1401	3	37057317	Intron 9-10	A	G	-	10588	2.5	0.0236116
1402	3	37057322	Intron 9-10	T	C	-	10588	1	0.00944465
1403	3	37057401	Intron 9-10	A	G	-	10588	1	0.00944465
1404	3	37057419	Intron 9-10	G	A	-	2657	1	0.0376364
1405	3	37057422	Intron 9-10	C	T	-	10588	1	0.00944465
1406	3	37057440	Intron 9-10	-	CCTGCTC	rs4647268	10588	3.5	0.0330563
1407	3	37057469	Intron 9-10	C	T	rs930296259	10588	1	0.00944465
1408	3	37057470	Intron 9-10	G	T	-	10588	1	0.00944465
1409	3	37057510	Intron 9-10	T	C	-	10588	1	0.00944465
1410	3	37057528	Intron 9-10	G	A	-	2657	2	0.0752729
1411	3	37057537	Intron 9-10	C	G	-	13245	2	0.0151
1412	3	37057570	Intron 9-10	G	A	-	10588	1	0.00944465
1413	3	37057571	Intron 9-10	T	C	-	10588	3	0.028334
1414	3	37057572	Intron 9-10	T	G	-	10588	1	0.00944465
1415	3	37057587	Intron 9-10	T	C	-	10588	1	0.00944465
1416	3	37057591	Intron 9-10	C	T	rs4647269	13945	888	6.36787
1417	3	37057592	Intron 9-10	G	A	-	10588	1	0.00944465
1418	3	37057602	Intron 9-10	C	G	-	10588	4	0.0377786
1419	3	37057605	Intron 9-10	C	T	-	10588	2.5	0.0236116
1420	3	37057621	Intron 9-10	C	T	-	10588	1	0.00944465
1421	3	37057673	Intron 9-10	C	T	-	10588	1	0.00944465
1422	3	37057692	Intron 9-10	C	T	rs556045065	2657	1	0.0376364
1423	3	37057716	Intron 9-10	G	T	rs4647272	10588	3.5	0.0330563
1424	3	37057732	Intron 9-10	A	G	-	10588	1	0.00944465
1425	3	37057736	Intron 9-10	T	C	rs140978117	13245	22	0.1661
1426	3	37057749	Intron 9-10	C	T	-	13245	10.5	0.0792752
1427	3	37057761	Intron 9-10	A	G	rs184471419	13335	5	0.0374953
1428	3	37057765	Intron 9-10	C	T	-	2657	1	0.0376364
1429	3	37057767	Intron 9-10	T	G	-	10588	1.5	0.014167
1430	3	37057824	Intron 9-10	T	A	-	10588	1	0.00944465
1431	3	37057825	Intron 9-10	C	T	rs575187302	13245	10.5	0.0792752
1432	3	37057830	Intron 9-10	G	A	rs545017486	13245	16.5	0.124575
1433	3	37057833	Intron 9-10	A	G	-	10588	1	0.00944465
1434	3	37057864	Intron 9-10	C	T	rs369220956	13245	11	0.0830502
1435	3	37057871	Intron 9-10	TGTT	-	-	13245	2	0.0151
1436	3	37057871	Intron 9-10	-	TGTTT	rs996801325	10588	1	0.00944465
1437	3	37057871	Intron 9-10	TGTTT	-	-	10588	1	0.00944465
1438	3	37057896	Intron 9-10	G	T	-	10588	1	0.00944465
1439	3	37057904	Intron 9-10	T	C	-	10588	1	0.00944465
1440	3	37057919	Intron 9-10	A	G	-	10588	1	0.00944465
1441	3	37057924	Intron 9-10	A	T	-	610	1	0.163934
1442	3	37057958	Intron 9-10	G	A	-	10588	1	0.00944465
1443	3	37057961	Intron 9-10	G	A	rs777463140	13245	2.5	0.018875
1444	3	37057971	Intron 9-10	G	C	-	10588	1	0.00944465
1445	3	37057988	Intron 9-10	T	C	rs373933798	10588	1	0.00944465
1446	3	37057994	Intron 9-10	C	T	-	10588	1	0.00944465
1447	3	37058011	Intron 9-10	C	A	rs4647274	10588	2	0.0188893
1448	3	37058070	Intron 9-10	G	T	-	10588	1	0.00944465
1449	3	37058081	Intron 9-10	G	T	rs1050218558	2657	1	0.0376364
1450	3	37058093	Intron 9-10	G	A	-	10588	1	0.00944465
1451	3	37058101	Intron 9-10	C	T	-	10588	1	0.00944465
1452	3	37058106	Intron 9-10	C	T	-	10588	3.5	0.0330563
1453	3	37058119	Intron 9-10	C	T	-	610	1	0.163934
1454	3	37058121	Intron 9-10	G	A	-	10588	1	0.00944465
1455	3	37058124	Intron 9-10	A	G	-	10588	1	0.00944465
1456	3	37058136	Intron 9-10	C	T	-	2657	1	0.0376364
1457	3	37058139	Intron 9-10	T	C	-	10588	1	0.00944465
1458	3	37058153	Intron 9-10	C	T	rs550334578	10588	1.5	0.014167
1459	3	37058165	Intron 9-10	C	T	-	10588	1	0.00944465
1460	3	37058183	Intron 9-10	A	G	-	10588	1	0.00944465
1461	3	37058184	Intron 9-10	T	C	-	10588	1	0.00944465
1462	3	37058185	Intron 9-10	G	A	-	10588	1	0.00944465
1463	3	37058195	Intron 9-10	C	T	rs997160949	10588	1	0.00944465
1464	3	37058199	Intron 9-10	C	T	-	10588	2.5	0.0236116
1465	3	37058205	Intron 9-10	T	A	rs947240852	13245	5.5	0.0415251
1466	3	37058210	Intron 9-10	C	G	-	10588	1	0.00944465
1467	3	37058216	Intron 9-10	C	G	-	10588	1	0.00944465
1468	3	37058221	Intron 9-10	T	A	-	10588	5.5	0.0519456
1469	3	37058253	Intron 9-10	C	T	-	10588	1	0.00944465
1470	3	37058274	Intron 9-10	C	T	-	10588	1	0.00944465
1471	3	37058276	Intron 9-10	C	T	rs567865329	13245	18	0.1359
1472	3	37058298	Intron 9-10	T	G	-	13245	2	0.0151
1473	3	37058307	Intron 9-10	G	C	-	10588	1	0.00944465
1474	3	37058320	Intron 9-10	G	T	-	10588	1.5	0.014167
1475	3	37058329	Intron 9-10	T	-	-	10588	1	0.00944465
1476	3	37058348	Intron 9-10	T	C	rs547084555	2657	2	0.0752729
1477	3	37058357	Intron 9-10	C	T	-	13245	4	0.0302001
1478	3	37058391	Intron 9-10	C	T	-	10588	1.5	0.014167
1479	3	37058405	Intron 9-10	C	T	rs924138417	10588	1	0.00944465
1480	3	37058406	Intron 9-10	G	A	-	13245	2	0.0151
1481	3	37058439	Intron 9-10	G	A	-	10588	1	0.00944465
1482	3	37058446	Intron 9-10	-	T	-	10588	1	0.00944465
1483	3	37058448	Intron 9-10	-	G	-	10588	1	0.00944465
1484	3	37058470	Intron 9-10	C	G	-	10588	2.5	0.0236116
1485	3	37058477	Intron 9-10	A	G	-	610	1	0.163934
1486	3	37058504	Intron 9-10	G	A	rs1045115067	10588	1	0.00944465
1487	3	37058509	Intron 9-10	A	G	rs4647277	13945	924	6.62603
1488	3	37058519	Intron 9-10	G	A	rs573015818	10588	1	0.00944465
1489	3	37058536	Intron 9-10	A	G	-	10588	1	0.00944465
1490	3	37058543	Intron 9-10	A	G	-	13245	3.5	0.0264251
1491	3	37058549	Intron 9-10	A	G	-	10588	1	0.00944465
1492	3	37058552	Intron 9-10	C	T	rs540087863	13245	5.5	0.0415251
1493	3	37058553	Intron 9-10	G	A	rs1031038999	10588	1	0.00944465
1494	3	37058567	Intron 9-10	T	C	-	10588	1	0.00944465
1495	3	37058615	Intron 9-10	A	G	-	10588	1	0.00944465
1496	3	37058634	Intron 9-10	A	G	-	13245	4	0.0302001
1497	3	37058687	Intron 9-10	A	G	-	10588	1	0.00944465
1498	3	37058733	Intron 9-10	C	T	-	10588	1	0.00944465
1499	3	37058775	Intron 9-10	T	G	rs4647278	10588	3.5	0.0330563
1500	3	37058779	Intron 9-10	A	G	rs112454989	10588	1.5	0.014167
1501	3	37058811	Intron 9-10	G	A	rs188805118	13945	32	0.229473
1502	3	37058815	Intron 9-10	G	A	-	10588	1	0.00944465
1503	3	37058821	Intron 9-10	T	C	rs55831958	13855	21.5	0.155179
1504	3	37058840	Intron 9-10	G	A	rs1007204869	10588	1	0.00944465
1505	3	37058863	Intron 9-10	T	C	-	10588	2	0.0188893
1506	3	37058864	Intron 9-10	C	T	-	10588	1	0.00944465
1507	3	37058872	Intron 9-10	T	C	-	10588	1	0.00944465
1508	3	37058884	Intron 9-10	A	G	-	10588	1	0.00944465
1509	3	37058891	Intron 9-10	C	T	-	10588	1	0.00944465
1510	3	37058918	Intron 9-10	A	G	rs104894998	10588	1	0.00944465
1511	3	37058926	Intron 9-10	G	A	-	10588	1	0.00944465
1512	3	37058967	Intron 9-10	T	C	-	610	1	0.163934
1513	3	37058981	Intron 9-10	T	C	-	2657	1	0.0376364
1514	3	37059106	Intron 10-11	A	G	rs377598055	4302	1	0.023245
1515	3	37059135	Intron 10-11	A	T	-	4302	5	0.116225
1516	3	37059146	Intron 10-11	G	C	-	10588	1	0.00944465
1517	3	37059150	Intron 10-11	C	G	-	18157	53	0.291898
1518	3	37059153	Intron 10-11	C	T	rs911822722	10588	3.5	0.0330563
1519	3	37059170	Intron 10-11	G	A	-	10588	1	0.00944465
1520	3	37059193	Intron 10-11	T	C	rs918524716	11198	2	0.0178603
1521	3	37059204	Intron 10-11	C	T	-	10588	1	0.00944465
1522	3	37059211	Intron 10-11	G	A	rs939136882	10588	1	0.00944465
1523	3	37059221	Intron 10-11	T	C	-	10588	1	0.00944465
1524	3	37059241	Intron 10-11	G	A	-	10588	1	0.00944465
1525	3	37059247	Intron 10-11	G	A	-	10588	1	0.00944465
1526	3	37059297	Intron 10-11	G	A	rs904182157	2657	1	0.0376364
1527	3	37059301	Intron 10-11	C	T	-	13245	6	0.0453001
1528	3	37059304	Intron 10-11	A	G	rs780865759	10588	1	0.00944465
1529	3	37059308	Intron 10-11	G	T	-	2657	1	0.0376364
1530	3	37059315	Intron 10-11	T	A	-	10588	1.5	0.014167
1531	3	37059340	Intron 10-11	C	T	-	10588	1	0.00944465
1532	3	37059358	Intron 10-11	G	A	-	10588	1	0.00944465
1533	3	37059380	Intron 10-11	G	A	rs749670164	13245	2	0.0151
1534	3	37059401	Intron 10-11	T	C	rs544329416	10588	1	0.00944465
1535	3	37059402	Intron 10-11	A	G	-	2657	1	0.0376364
1536	3	37059427	Intron 10-11	G	T	-	10588	1	0.00944465
1537	3	37059455	Intron 10-11	C	T	-	13245	2	0.0151
1538	3	37059460	Intron 10-11	C	T	-	10588	1	0.00944465
1539	3	37059463	Intron 10-11	C	T	-	10588	1	0.00944465
1540	3	37059484	Intron 10-11	C	T	-	10588	1	0.00944465
1541	3	37059500	Intron 10-11	C	T	-	10588	1.5	0.014167
1542	3	37059528	Intron 10-11	C	T	-	10588	1	0.00944465
1543	3	37059582	Intron 10-11	C	T	rs181484846	13335	515	3.86202
1544	3	37059596	Intron 10-11	T	C	-	10588	1	0.00944465
1545	3	37059615	Intron 10-11	A	G	rs144135447	10588	2	0.0188893
1546	3	37059623	Intron 10-11	A	G	-	10588	1	0.00944465
1547	3	37059631	Intron 10-11	G	A	rs532424969	10588	1.5	0.014167
1548	3	37059654	Intron 10-11	C	T	rs972059732	10588	1	0.00944465
1549	3	37059655	Intron 10-11	G	A	rs901892298	10588	1	0.00944465
1550	3	37059677	Intron 10-11	G	A	rs987548477	2657	1	0.0376364
1551	3	37059680	Intron 10-11	T	G	-	10588	1	0.00944465
1552	3	37059717	Intron 10-11	G	A	-	13245	11.5	0.0868252
1553	3	37059741	Intron 10-11	G	A	-	2657	1	0.0376364
1554	3	37059748	Intron 10-11	C	T	rs934915080	13245	7	0.0528501
1555	3	37059749	Intron 10-11	G	A	-	10588	1	0.00944465
1556	3	37059760	Intron 10-11	T	C	rs377747738	13244	5.5	0.0415282
1557	3	37059761	Intron 10-11	-	A	rs35012418	10588	1495	14.1198
1558	3	37059761	Intron 10-11	-	AA	-	10588	15	0.14167
1559	3	37059761	Intron 10-11	A	-	-	10588	1715	16.1976
1560	3	37059761	Intron 10-11	AA	-	-	10588	143.5	1.35531
1561	3	37059761	Intron 10-11	AAA	-	-	10588	32.5	0.306951
1562	3	37059761	Intron 10-11	AAAA	-	-	10588	9.5	0.0897242
1563	3	37059781	Intron 10-11	TG	-	-	10588	1	0.00944465
1564	3	37059797	Intron 10-11	G	A	-	10588	1	0.00944465
1565	3	37059845	Intron 10-11	G	T	-	10588	1	0.00944465
1566	3	37059874	Intron 10-11	A	T	-	13245	2	0.0151
1567	3	37059882	Intron 10-11	C	T	-	13245	2.5	0.018875
1568	3	37059906	Intron 10-11	T	C	rs558670179	2657	1	0.0376364
1569	3	37059935	Intron 10-11	G	A	rs147320649	10588	1	0.00944465
1570	3	37059942	Intron 10-11	C	T	rs111574542	13932	535.5	3.84367
1571	3	37059953	Intron 10-11	G	A	-	10588	1	0.00944465
1572	3	37059978	Intron 10-11	T	C	rs375734966	10588	1	0.00944465
1573	3	37060001	Intron 10-11	C	A	-	610	1	0.163934
1574	3	37060034	Intron 10-11	C	T	-	10588	3	0.028334
1575	3	37060057	Intron 10-11	G	T	-	10588	1	0.00944465
1576	3	37060065	Intron 10-11	G	A	rs553529199	10588	1.5	0.014167
1577	3	37060084	Intron 10-11	G	C	-	10588	1	0.00944465
1578	3	37060093	Intron 10-11	GTA	-	-	10588	1	0.00944465
1579	3	37060098	Intron 10-11	T	C	-	10588	1	0.00944465
1580	3	37060111	Intron 10-11	T	C	-	10588	1	0.00944465
1581	3	37060130	Intron 10-11	T	C	rs896974248	13245	3.5	0.0264251
1582	3	37060135	Intron 10-11	C	T	-	10588	1	0.00944465
1583	3	37060161	Intron 10-11	C	G	rs540575378	10588	3.5	0.0330563
1584	3	37060170	Intron 10-11	T	C	-	10588	1	0.00944465
1585	3	37060182	Intron 10-11	C	T	-	10588	1	0.00944465
1586	3	37060188	Intron 10-11	G	A	rs550048227	10588	1	0.00944465
1587	3	37060190	Intron 10-11	G	A	rs370611028	13245	34.5	0.260476
1588	3	37060219	Intron 10-11	C	T	-	10588	1	0.00944465
1589	3	37060220	Intron 10-11	G	A	rs188529059	13245	19.5	0.147225
1590	3	37060237	Intron 10-11	G	T	rs181031438	10588	1	0.00944465
1591	3	37060321	Intron 10-11	C	T	rs11710807	13335	886.5	6.64792
1592	3	37060328	Intron 10-11	A	T	-	10588	1	0.00944465
1593	3	37060373	Intron 10-11	C	T	rs368450383	2657	1	0.0376364
1594	3	37060385	Intron 10-11	C	T	-	10588	1.5	0.014167
1595	3	37060442	Intron 10-11	A	G	-	10588	1	0.00944465
1596	3	37060457	Intron 10-11	T	A	-	10588	1	0.00944465
1597	3	37060459	Intron 10-11	T	C	rs9857293	10588	3.5	0.0330563
1598	3	37060463	Intron 10-11	C	T	rs373885093	13245	2	0.0151
1599	3	37060510	Intron 10-11	C	T	rs146556921	13335	158.5	1.1886
1600	3	37060558	Intron 10-11	G	A	-	10588	1	0.00944465
1601	3	37060562	Intron 10-11	A	C	rs191978003	13335	6.5	0.0487439
1602	3	37060584	Intron 10-11	G	C	-	10588	1	0.00944465
1603	3	37060585	Intron 10-11	G	A	rs371618327	13245	3	0.0226501
1604	3	37060594	Intron 10-11	T	C	-	10588	1	0.00944465
1605	3	37060608	Intron 10-11	A	G	-	10588	1	0.00944465
1606	3	37060639	Intron 10-11	G	A	rs962337456	13245	8.5	0.0641752
1607	3	37060658	Intron 10-11	A	G	-	10588	1	0.00944465
1608	3	37060658	Intron 10-11	A	T	-	10588	1	0.00944465
1609	3	37060719	Intron 10-11	G	A	-	10588	1	0.00944465
1610	3	37060738	Intron 10-11	G	T	-	10588	3	0.028334
1611	3	37060738	Intron 10-11	G	A	-	10588	1	0.00944465
1612	3	37060749	Intron 10-11	C	T	-	10588	1	0.00944465
1613	3	37060774	Intron 10-11	A	G	-	10588	1	0.00944465
1614	3	37060808	Intron 10-11	A	G	-	10588	1	0.00944465
1615	3	37060855	Intron 10-11	G	A	-	10588	1	0.00944465
1616	3	37060860	Intron 10-11	G	C	-	10588	1	0.00944465
1617	3	37060873	Intron 10-11	C	T	-	10588	1	0.00944465
1618	3	37060883	Intron 10-11	C	T	-	10588	1	0.00944465
1619	3	37060895	Intron 10-11	T	G	-	10588	1.5	0.014167
1620	3	37060898	Intron 10-11	T	C	rs143107742	10588	4.5	0.0425009
1621	3	37060928	Intron 10-11	A	G	-	10588	1	0.00944465
1622	3	37060943	Intron 10-11	G	A	-	13245	2	0.0151
1623	3	37060966	Intron 10-11	T	C	-	2657	3	0.112909
1624	3	37060971	Intron 10-11	C	T	rs951161242	13245	5	0.0377501
1625	3	37060977	Intron 10-11	A	G	rs76460068	13245	21	0.15855
1626	3	37060994	Intron 10-11	C	G	-	10588	1	0.00944465
1627	3	37060994	Intron 10-11	C	T	-	10588	1	0.00944465
1628	3	37061049	Intron 10-11	A	G	-	10588	2.5	0.0236116
1629	3	37061065	Intron 10-11	A	G	-	10588	1	0.00944465
1630	3	37061129	Intron 10-11	A	G	-	10588	1	0.00944465
1631	3	37061137	Intron 10-11	AAAG	-	-	10588	1	0.00944465
1632	3	37061173	Intron 10-11	C	T	-	10588	1	0.00944465
1633	3	37061202	Intron 10-11	C	A	-	2657	1	0.0376364
1634	3	37061203	Intron 10-11	A	G	-	13245	3.5	0.0264251
1635	3	37061212	Intron 10-11	A	G	rs552565914	90	1	1.11111
1636	3	37061223	Intron 10-11	T	-	-	2657	2	0.0752729
1637	3	37061238	Intron 10-11	A	G	-	10588	1	0.00944465
1638	3	37061241	Intron 10-11	G	T	-	10588	1	0.00944465
1639	3	37061256	Intron 10-11	G	A	rs190783043	13335	40.5	0.303712
1640	3	37061260	Intron 10-11	A	G	-	10588	2	0.0188893
1641	3	37061284	Intron 10-11	C	T	rs762965853	10588	1	0.00944465
1642	3	37061285	Intron 10-11	G	A	-	10588	1	0.00944465
1643	3	37061302	Intron 10-11	G	C	-	10588	1	0.00944465
1644	3	37061327	Intron 10-11	T	C	-	10588	1	0.00944465
1645	3	37061340	Intron 10-11	C	T	-	10588	2	0.0188893
1646	3	37061341	Intron 10-11	G	A	rs150319478	10588	1	0.00944465
1647	3	37061370	Intron 10-11	C	T	-	10588	1	0.00944465
1648	3	37061378	Intron 10-11	G	A	-	10588	1	0.00944465
1649	3	37061399	Intron 10-11	A	G	-	10588	1	0.00944465
1650	3	37061401	Intron 10-11	A	C	rs963798900	2657	1	0.0376364
1651	3	37061418	Intron 10-11	G	A	-	10588	1	0.00944465
1652	3	37061423	Intron 10-11	C	T	-	10588	1	0.00944465
1653	3	37061454	Intron 10-11	T	G	rs565802694	13245	15.5	0.117025
1654	3	37061459	Intron 10-11	C	A	-	10588	1	0.00944465
1655	3	37061461	Intron 10-11	G	A	-	10588	1	0.00944465
1656	3	37061466	Intron 10-11	G	A	rs750083101	2657	1	0.0376364
1657	3	37061506	Intron 10-11	G	A	rs890367523	13245	2	0.0151
1658	3	37061508	Intron 10-11	C	T	-	13245	3	0.0226501
1659	3	37061509	Intron 10-11	C	T	rs1007868590	13245	6	0.0453001
1660	3	37061535	Intron 10-11	C	T	rs538152219	2657	2	0.0752729
1661	3	37061536	Intron 10-11	G	A	rs755653790	10588	1	0.00944465
1662	3	37061539	Intron 10-11	A	T	-	10588	1	0.00944465
1663	3	37061552	Intron 10-11	A	G	-	10588	1	0.00944465
1664	3	37061564	Intron 10-11	G	A	-	10588	1	0.00944465
1665	3	37061573	Intron 10-11	A	G	-	10588	1	0.00944465
1666	3	37061580	Intron 10-11	A	G	-	10588	1	0.00944465
1667	3	37061593	Intron 10-11	G	A	-	10588	1.5	0.014167
1668	3	37061612	Intron 10-11	T	C	-	10588	1	0.00944465
1669	3	37061617	Intron 10-11	-	A	-	10588	1	0.00944465
1670	3	37061632	Intron 10-11	A	G	-	10588	1	0.00944465
1671	3	37061675	Intron 10-11	G	A	-	10588	1	0.00944465
1672	3	37061691	Intron 10-11	C	T	-	13245	2	0.0151
1673	3	37061720	Intron 10-11	G	C	rs104894999	10588	2	0.0188893
1674	3	37061746	Intron 10-11	T	C	-	10588	1	0.00944465
1675	3	37061753	Intron 10-11	C	T	rs531591258	17547	12.5	0.0712372
1676	3	37061760	Intron 10-11	C	T	-	10588	1	0.00944465
1677	3	37061766	Intron 10-11	T	A	-	10588	1	0.00944465
1678	3	37061963	Intron 11-12	G	A	rs267607817	6959	4	0.0574795
1679	3	37061972	Intron 11-12	C	A	-	10588	1	0.00944465
1680	3	37061974	Intron 11-12	A	C	-	10588	1	0.00944465
1681	3	37062005	Intron 11-12	C	T	rs55986674	13245	2	0.0151
1682	3	37062013	Intron 11-12	C	T	rs878867821	10588	1	0.00944465
1683	3	37062014	Intron 11-12	G	A	-	10588	1	0.00944465
1684	3	37062040	Intron 11-12	T	C	rs2286939	18247	1327.5	7.27517
1685	3	37062073	Intron 11-12	A	C	-	10588	1.5	0.014167
1686	3	37062116	Intron 11-12	T	G	rs1047575517	10588	1	0.00944465
1687	3	37062131	Intron 11-12	G	T	-	10588	1	0.00944465
1688	3	37062145	Intron 11-12	G	A	-	13245	27	0.203851
1689	3	37062157	Intron 11-12	C	T	-	10588	1	0.00944465
1690	3	37062191	Intron 11-12	C	T	-	10588	1	0.00944465
1691	3	37062196	Intron 11-12	C	-	-	10588	1	0.00944465
1692	3	37062207	Intron 11-12	C	T	-	2657	1	0.0376364
1693	3	37062234	Intron 11-12	C	T	-	10588	1	0.00944465
1694	3	37062237	Intron 11-12	C	G	-	10588	1	0.00944465
1695	3	37062246	Intron 11-12	G	A	-	10588	1	0.00944465
1696	3	37062249	Intron 11-12	C	T	-	10588	1	0.00944465
1697	3	37062277	Intron 11-12	A	G	rs56149560	10588	1	0.00944465
1698	3	37062293	Intron 11-12	G	T	-	10588	1	0.00944465
1699	3	37062304	Intron 11-12	G	C	-	13245	2	0.0151
1700	3	37062314	Intron 11-12	C	T	-	10588	1	0.00944465
1701	3	37062326	Intron 11-12	G	A	-	10588	1	0.00944465
1702	3	37062346	Intron 11-12	G	T	-	13245	8	0.0604002
1703	3	37062347	Intron 11-12	G	T	-	10588	7	0.0661126
1704	3	37062357	Intron 11-12	T	C	-	10588	1	0.00944465
1705	3	37062370	Intron 11-12	G	-	-	10588	1.5	0.014167
1706	3	37062373	Intron 11-12	G	A	-	10588	1	0.00944465
1707	3	37062383	Intron 11-12	G	A	rs1003300426	10588	4	0.0377786
1708	3	37062393	Intron 11-12	C	T	-	10588	1	0.00944465
1709	3	37062418	Intron 11-12	C	T	-	13245	4	0.0302001
1710	3	37062424	Intron 11-12	T	A	rs182578101	13245	62	0.468101
1711	3	37062433	Intron 11-12	G	A	-	13245	4	0.0302001
1712	3	37062435	Intron 11-12	G	A	-	10588	1	0.00944465
1713	3	37062470	Intron 11-12	A	G	-	10588	1	0.00944465
1714	3	37062473	Intron 11-12	G	T	-	10588	6.5	0.0613903
1715	3	37062486	Intron 11-12	T	-	-	2657	1	0.0376364
1716	3	37062492	Intron 11-12	C	T	-	10588	1	0.00944465
1717	3	37062508	Intron 11-12	A	G	rs1004239533	10588	1	0.00944465
1718	3	37062522	Intron 11-12	C	T	rs539907915	13245	9	0.0679502
1719	3	37062534	Intron 11-12	G	A	-	10588	1	0.00944465
1720	3	37062555	Intron 11-12	A	G	rs143542775	13245	98.5	0.743677
1721	3	37062570	Intron 11-12	T	A	-	10588	2	0.0188893
1722	3	37062584	Intron 11-12	T	C	-	10588	1	0.00944465
1723	3	37062595	Intron 11-12	C	T	-	10588	1	0.00944465
1724	3	37062603	Intron 11-12	T	C	-	10588	1	0.00944465
1725	3	37062666	Intron 11-12	A	G	-	10588	1	0.00944465
1726	3	37062668	Intron 11-12	A	G	rs939104538	10588	1	0.00944465
1727	3	37062690	Intron 11-12	-	T	-	2657	1	0.0376364
1728	3	37062729	Intron 11-12	A	C	-	13245	7	0.0528501
1729	3	37062731	Intron 11-12	G	-	-	10588	1	0.00944465
1730	3	37062746	Intron 11-12	C	G	-	10588	1	0.00944465
1731	3	37062759	Intron 11-12	A	G	-	10588	1	0.00944465
1732	3	37062760	Intron 11-12	A	G	-	10588	1	0.00944465
1733	3	37062791	Intron 11-12	C	T	rs193111818	10588	1	0.00944465
1734	3	37062800	Intron 11-12	A	G	-	10588	1	0.00944465
1735	3	37062843	Intron 11-12	T	C	rs965409849	10588	1	0.00944465
1736	3	37062854	Intron 11-12	C	T	rs3774339	13335	886	6.64417
1737	3	37062867	Intron 11-12	C	G	-	10588	1	0.00944465
1738	3	37062880	Intron 11-12	C	-	-	10588	1	0.00944465
1739	3	37062904	Intron 11-12	C	T	-	2657	1	0.0376364
1740	3	37062940	Intron 11-12	A	G	-	10588	1	0.00944465
1741	3	37062950	Intron 11-12	C	T	-	10588	1	0.00944465
1742	3	37062959	Intron 11-12	G	T	rs3774338	13335	886	6.64417
1743	3	37062960	Intron 11-12	A	T	rs567260048	13245	28.5	0.215176
1744	3	37062963	Intron 11-12	GTGGCAG	-	-	10588	1.5	0.014167
1745	3	37062967	Intron 11-12	G	A	-	10588	1.5	0.014167
1746	3	37062983	Intron 11-12	A	G	-	10588	1	0.00944465
1747	3	37062991	Intron 11-12	C	G	-	10588	2	0.0188893
1748	3	37063014	Intron 11-12	C	T	-	10588	1	0.00944465
1749	3	37063062	Intron 11-12	G	C	-	10588	1	0.00944465
1750	3	37063083	Intron 11-12	A	G	-	10588	1	0.00944465
1751	3	37063084	Intron 11-12	T	C	-	10588	1	0.00944465
1752	3	37063105	Intron 11-12	G	A	-	13245	5.5	0.0415251
1753	3	37063106	Intron 11-12	G	A	rs1042093623	10588	1	0.00944465
1754	3	37063111	Intron 11-12	A	G	-	10588	1	0.00944465
1755	3	37063121	Intron 11-12	A	G	-	10588	1	0.00944465
1756	3	37063131	Intron 11-12	C	T	-	10588	1	0.00944465
1757	3	37063143	Intron 11-12	G	C	-	10588	1	0.00944465
1758	3	37063149	Intron 11-12	G	T	-	610	1	0.163934
1759	3	37063152	Intron 11-12	T	C	-	10588	1	0.00944465
1760	3	37063174	Intron 11-12	G	A	-	10588	1	0.00944465
1761	3	37063178	Intron 11-12	A	G	-	2657	3	0.112909
1762	3	37063198	Intron 11-12	G	T	-	10588	1	0.00944465
1763	3	37063236	Intron 11-12	G	A	rs145583340	13335	40	0.299963
1764	3	37063281	Intron 11-12	A	G	-	10588	1	0.00944465
1765	3	37063286	Intron 11-12	-	A	-	13245	2	0.0151
1766	3	37063293	Intron 11-12	A	G	-	10588	1	0.00944465
1767	3	37063297	Intron 11-12	G	A	rs752020791	10588	1	0.00944465
1768	3	37063299	Intron 11-12	G	A	-	10588	1	0.00944465
1769	3	37063302	Intron 11-12	A	T	-	10588	1	0.00944465
1770	3	37063306	Intron 11-12	CTGT	-	-	10588	1.5	0.014167
1771	3	37063322	Intron 11-12	A	C	-	10588	1	0.00944465
1772	3	37063359	Intron 11-12	C	T	rs537544064	13245	12.5	0.0943752
1773	3	37063360	Intron 11-12	G	A	rs1021438220	10588	1	0.00944465
1774	3	37063362	Intron 11-12	T	C	rs967865660	13245	12.5	0.0943752
1775	3	37063363	Intron 11-12	C	T	rs1022833104	10588	1	0.00944465
1776	3	37063364	Intron 11-12	A	G	-	10588	1.5	0.014167
1777	3	37063397	Intron 11-12	A	T	-	10588	1	0.00944465
1778	3	37063403	Intron 11-12	A	G	-	10588	1	0.00944465
1779	3	37063411	Intron 11-12	G	A	-	10588	1	0.00944465
1780	3	37063452	Intron 11-12	G	C	-	10588	1	0.00944465
1781	3	37063463	Intron 11-12	G	C	-	10588	1	0.00944465
1782	3	37063519	Intron 11-12	G	C	-	10588	1	0.00944465
1783	3	37063527	Intron 11-12	A	G	rs951836367	13932	63.5	0.455785
1784	3	37063551	Intron 11-12	G	A	-	10588	1	0.00944465
1785	3	37063660	Intron 11-12	C	T	-	10588	1	0.00944465
1786	3	37063682	Intron 11-12	C	G	-	10588	1	0.00944465
1787	3	37063728	Intron 11-12	G	A	rs28754348	13335	886	6.64417
1788	3	37063756	Intron 11-12	C	A	-	10588	1	0.00944465
1789	3	37063841	Intron 11-12	G	C	-	10588	1	0.00944465
1790	3	37063863	Intron 11-12	G	C	-	10588	1	0.00944465
1791	3	37063869	Intron 11-12	AGAG	-	-	10588	1	0.00944465
1792	3	37063887	Intron 11-12	G	A	-	10588	1	0.00944465
1793	3	37063895	Intron 11-12	A	C	-	10588	1	0.00944465
1794	3	37063907	Intron 11-12	T	C	rs75793463	13335	274	2.05474
1795	3	37063946	Intron 11-12	A	G	-	10588	1	0.00944465
1796	3	37063953	Intron 11-12	G	A	-	10588	1	0.00944465
1797	3	37063969	Intron 11-12	A	C	-	10588	1	0.00944465
1798	3	37064007	Intron 11-12	A	G	rs1055477167	10588	1	0.00944465
1799	3	37064019	Intron 11-12	G	C	-	10588	1	0.00944465
1800	3	37064036	Intron 11-12	G	C	-	10588	1.5	0.014167
1801	3	37064066	Intron 11-12	A	G	-	10588	1	0.00944465
1802	3	37064099	Intron 11-12	T	C	-	10588	1	0.00944465
1803	3	37064107	Intron 11-12	C	T	-	10588	1	0.00944465
1804	3	37064112	Intron 11-12	G	A	rs181106166	13335	6.5	0.0487439
1805	3	37064129	Intron 11-12	G	C	-	10588	1	0.00944465
1806	3	37064149	Intron 11-12	A	T	-	10588	1	0.00944465
1807	3	37064159	Intron 11-12	C	T	-	10588	1	0.00944465
1808	3	37064172	Intron 11-12	A	G	-	10588	1.5	0.014167
1809	3	37064176	Intron 11-12	T	C	-	10588	2	0.0188893
1810	3	37064242	Intron 11-12	T	A	-	10588	1	0.00944465
1811	3	37064249	Intron 11-12	G	A	-	10588	1	0.00944465
1812	3	37064253	Intron 11-12	A	T	-	10588	1	0.00944465
1813	3	37064301	Intron 11-12	C	G	-	10588	1	0.00944465
1814	3	37064316	Intron 11-12	C	T	-	10588	1.5	0.014167
1815	3	37064373	Intron 11-12	C	T	-	10588	1	0.00944465
1816	3	37064375	Intron 11-12	G	A	-	10588	1	0.00944465
1817	3	37064407	Intron 11-12	C	T	rs3774337	13335	58	0.434946
1818	3	37064443	Intron 11-12	T	C	-	10588	1	0.00944465
1819	3	37064450	Intron 11-12	A	G	-	10588	1	0.00944465
1820	3	37064454	Intron 11-12	G	C	rs553129982	13245	2	0.0151
1821	3	37064454	Intron 11-12	G	T	-	610	1	0.163934
1822	3	37064463	Intron 11-12	C	T	-	10588	1	0.00944465
1823	3	37064494	Intron 11-12	C	T	rs947164422	10588	5	0.0472233
1824	3	37064523	Intron 11-12	T	-	-	10588	1	0.00944465
1825	3	37064531	Intron 11-12	T	C	-	10588	1	0.00944465
1826	3	37064555	Intron 11-12	A	G	rs997205931	10588	1	0.00944465
1827	3	37064582	Intron 11-12	C	T	rs78821099	10588	2	0.0188893
1828	3	37064590	Intron 11-12	G	T	rs538551652	2657	1	0.0376364
1829	3	37064605	Intron 11-12	G	T	-	2657	1	0.0376364
1830	3	37064641	Intron 11-12	C	T	-	10588	1	0.00944465
1831	3	37064662	Intron 11-12	T	C	rs977295449	10588	1	0.00944465
1832	3	37064711	Intron 11-12	C	A	rs78469656	10588	2	0.0188893
1833	3	37064754	Intron 11-12	A	G	-	10588	1	0.00944465
1834	3	37064756	Intron 11-12	T	C	-	10588	1	0.00944465
1835	3	37064778	Intron 11-12	CTC	-	-	13245	3	0.0226501
1836	3	37064784	Intron 11-12	C	T	rs932942965	13245	4	0.0302001
1837	3	37064795	Intron 11-12	C	T	-	10588	1	0.00944465
1838	3	37064852	Intron 11-12	T	G	-	10588	1	0.00944465
1839	3	37064853	Intron 11-12	A	G	-	13245	2.5	0.018875
1840	3	37064880	Intron 11-12	C	T	-	2657	1	0.0376364
1841	3	37064882	Intron 11-12	C	A	rs117535635	13335	354	2.65467
1842	3	37064891	Intron 11-12	A	G	-	10588	1	0.00944465
1843	3	37064926	Intron 11-12	T	C	-	10588	2	0.0188893
1844	3	37064940	Intron 11-12	-	C	rs888317023	2657	1	0.0376364
1845	3	37064946	Intron 11-12	C	A	-	10588	1	0.00944465
1846	3	37064958	Intron 11-12	G	T	-	10588	1	0.00944465
1847	3	37064972	Intron 11-12	G	-	-	10588	1	0.00944465
1848	3	37065038	Intron 11-12	C	T	-	10588	1	0.00944465
1849	3	37065063	Intron 11-12	T	C	rs963854924	10588	1	0.00944465
1850	3	37065081	Intron 11-12	A	T	-	10588	1.5	0.014167
1851	3	37065090	Intron 11-12	A	G	-	10588	1	0.00944465
1852	3	37065093	Intron 11-12	G	A	rs1031852576	13245	2.5	0.018875
1853	3	37065102	Intron 11-12	T	G	-	10588	1	0.00944465
1854	3	37065126	Intron 11-12	A	G	rs922304221	13245	4	0.0302001
1855	3	37065137	Intron 11-12	G	A	rs567737852	10588	1.5	0.014167
1856	3	37065169	Intron 11-12	A	T	rs111782287	13245	12.5	0.0943752
1857	3	37065190	Intron 11-12	C	T	rs777834894	13245	4	0.0302001
1858	3	37065204	Intron 11-12	T	G	-	10588	1	0.00944465
1859	3	37065225	Intron 11-12	C	T	rs895184219	10588	1	0.00944465
1860	3	37065226	Intron 11-12	G	A	-	10588	2	0.0188893
1861	3	37065229	Intron 11-12	G	A	-	10588	1	0.00944465
1862	3	37065257	Intron 11-12	A	G	-	2657	1	0.0376364
1863	3	37065259	Intron 11-12	TG	-	-	2657	5	0.188182
1864	3	37065266	Intron 11-12	G	A	rs1052887922	10588	1	0.00944465
1865	3	37065298	Intron 11-12	AGTG	-	-	13245	11	0.0830502
1866	3	37065339	Intron 11-12	G	A	-	10588	1	0.00944465
1867	3	37065352	Intron 11-12	T	C	-	10588	1	0.00944465
1868	3	37065353	Intron 11-12	C	T	-	10588	4	0.0377786
1869	3	37065365	Intron 11-12	-	C	-	10588	1	0.00944465
1870	3	37065376	Intron 11-12	A	G	rs1016731115	10588	2	0.0188893
1871	3	37065445	Intron 11-12	A	G	-	2657	1	0.0376364
1872	3	37065515	Intron 11-12	C	T	rs191031106	10588	1	0.00944465
1873	3	37065516	Intron 11-12	G	A	rs904084929	2657	1	0.0376364
1874	3	37065538	Intron 11-12	T	C	-	10588	1	0.00944465
1875	3	37065543	Intron 11-12	T	C	-	10588	1	0.00944465
1876	3	37065551	Intron 11-12	T	C	-	10588	2	0.0188893
1877	3	37065565	Intron 11-12	A	G	rs558553952	10588	1.5	0.014167
1878	3	37065569	Intron 11-12	A	G	-	10588	1	0.00944465
1879	3	37065571	Intron 11-12	A	G	-	10588	1	0.00944465
1880	3	37065589	Intron 11-12	-	TA	rs753142720	10588	1	0.00944465
1881	3	37065595	Intron 11-12	A	G	-	2657	1	0.0376364
1882	3	37065604	Intron 11-12	C	A	-	10588	1	0.00944465
1883	3	37065605	Intron 11-12	G	A	rs12489959	13932	1691	12.1375
1884	3	37065609	Intron 11-12	A	G	rs1025864939	10588	1	0.00944465
1885	3	37065616	Intron 11-12	G	A	rs185900674	10588	1	0.00944465
1886	3	37065626	Intron 11-12	G	A	-	10588	1	0.00944465
1887	3	37065630	Intron 11-12	-	TA	-	2657	1	0.0376364
1888	3	37065638	Intron 11-12	A	G	-	10588	1	0.00944465
1889	3	37065640	Intron 11-12	A	T	rs543162928	13245	2	0.0151
1890	3	37065640	Intron 11-12	A	G	-	10588	1	0.00944465
1891	3	37065642	Intron 11-12	T	A	rs1052707494	10588	1	0.00944465
1892	3	37065669	Intron 11-12	A	T	rs80060540	10588	2	0.0188893
1893	3	37065722	Intron 11-12	A	G	-	2657	1	0.0376364
1894	3	37065761	Intron 11-12	CTT	-	-	10588	1.5	0.014167
1895	3	37065774	Intron 11-12	C	T	-	10588	1	0.00944465
1896	3	37065801	Intron 11-12	T	C	rs142039148	13335	16	0.119985
1897	3	37065804	Intron 11-12	T	C	-	10588	1	0.00944465
1898	3	37065814	Intron 11-12	G	T	-	2657	1	0.0376364
1899	3	37065814	Intron 11-12	G	A	-	10588	1	0.00944465
1900	3	37065815	Intron 11-12	T	G	-	10588	1	0.00944465
1901	3	37065822	Intron 11-12	A	G	-	10588	1	0.00944465
1902	3	37065826	Intron 11-12	A	C	rs568802923	13335	25	0.187477
1903	3	37065838	Intron 11-12	A	G	-	10588	1	0.00944465
1904	3	37065840	Intron 11-12	C	T	-	10588	1	0.00944465
1905	3	37065849	Intron 11-12	G	A	-	2657	1	0.0376364
1906	3	37065863	Intron 11-12	T	C	rs557848775	10588	1	0.00944465
1907	3	37065954	Intron 11-12	A	G	-	2657	1	0.0376364
1908	3	37066111	Intron 11-12	G	A	rs146315153	10588	1	0.00944465
1909	3	37066156	Intron 11-12	C	T	rs754002911	10588	1	0.00944465
1910	3	37066157	Intron 11-12	G	A	rs759738343	10588	1	0.00944465
1911	3	37066211	Intron 11-12	C	T	rs371003235	10588	1	0.00944465
1912	3	37066236	Intron 11-12	A	T	-	610	1	0.163934
1913	3	37066247	Intron 11-12	A	G	rs527763775	10588	1	0.00944465
1914	3	37066298	Intron 11-12	T	C	-	13245	6.5	0.0490751
1915	3	37066317	Intron 11-12	G	A	rs577058881	13245	2	0.0151
1916	3	37066347	Intron 11-12	G	C	-	10588	1	0.00944465
1917	3	37066366	Intron 11-12	T	G	-	10588	1	0.00944465
1918	3	37066369	Intron 11-12	T	C	rs6550445	13335	889	6.66667
1919	3	37066370	Intron 11-12	G	A	rs148504039	13245	46	0.347301
1920	3	37066373	Intron 11-12	T	A	rs6550446	13335	891.5	6.68541
1921	3	37066385	Intron 11-12	T	A	-	10588	1	0.00944465
1922	3	37066454	Intron 11-12	C	T	-	2657	1	0.0376364
1923	3	37066460	Intron 11-12	T	C	rs1018137506	10588	1	0.00944465
1924	3	37066473	Intron 11-12	C	T	rs142235780	10588	1	0.00944465
1925	3	37066474	Intron 11-12	G	A	rs956297185	13245	2	0.0151
1926	3	37066518	Intron 11-12	A	G	rs1010097257	10588	1	0.00944465
1927	3	37066536	Intron 11-12	G	A	-	10588	1	0.00944465
1928	3	37066590	Intron 11-12	T	C	-	13245	2	0.0151
1929	3	37066605	Intron 11-12	T	G	-	10588	1	0.00944465
1930	3	37066610	Intron 11-12	A	G	-	10588	1	0.00944465
1931	3	37066647	Intron 11-12	G	A	-	13245	2	0.0151
1932	3	37066699	Intron 11-12	G	C	-	10588	1	0.00944465
1933	3	37066718	Intron 11-12	T	G	rs139156766	13335	122.5	0.918635
1934	3	37066721	Intron 11-12	C	A	-	10588	1	0.00944465
1935	3	37066723	Intron 11-12	G	C	-	10588	1	0.00944465
1936	3	37066737	Intron 11-12	C	T	rs867325663	2657	2	0.0752729
1937	3	37066738	Intron 11-12	G	A	rs755894439	10588	1	0.00944465
1938	3	37066760	Intron 11-12	G	A	-	10588	1	0.00944465
1939	3	37066761	Intron 11-12	C	T	-	10588	1	0.00944465
1940	3	37066778	Intron 11-12	T	C	rs1039091269	10588	1	0.00944465
1941	3	37066792	Intron 11-12	T	C	rs113939899	10588	1.5	0.014167
1942	3	37066797	Intron 11-12	A	G	-	13245	8.5	0.0641752
1943	3	37066803	Intron 11-12	T	A	-	10588	1.5	0.014167
1944	3	37066822	Intron 11-12	G	A	rs1000285072	2657	1	0.0376364
1945	3	37066822	Intron 11-12	G	C	-	2657	1	0.0376364
1946	3	37066822	Intron 11-12	TCT	-	-	10588	4.5	0.0425009
1947	3	37066825	Intron 11-12	T	G	-	2657	1	0.0376364
1948	3	37066838	Intron 11-12	-	C	rs1030438977	2657	1	0.0376364
1949	3	37066873	Intron 11-12	G	A	-	10588	1	0.00944465
1950	3	37066938	Intron 11-12	T	G	-	10588	1	0.00944465
1951	3	37066964	Intron 11-12	G	T	-	10588	1	0.00944465
1952	3	37066964	Intron 11-12	G	A	-	10588	1	0.00944465
1953	3	37066972	Intron 11-12	T	C	-	10588	1	0.00944465
1954	3	37066985	Intron 11-12	A	G	-	10588	1	0.00944465
1955	3	37067025	Intron 11-12	G	A	-	10588	1	0.00944465
1956	3	37067050	Intron 11-12	A	G	rs11129748	18247	1256	6.88332
1957	3	37067052	Intron 11-12	A	G	-	4302	2	0.04649
1958	3	37067075	Intron 11-12	-	TA	-	17547	269.5	1.53588
1959	3	37067075	Intron 11-12	TATATA	-	-	10588	29.5	0.278617
1960	3	37067075	Intron 11-12	TATA	-	-	10588	112	1.0578
1961	3	37067075	Intron 11-12	TATATATA	-	-	10588	10	0.0944465
1962	3	37067075	Intron 11-12	TA	-	-	10588	143	1.35059
1963	3	37067075	Intron 11-12	-	TATA	-	10588	25	0.236116
1964	3	37067076	Intron 11-12	TA	-	-	610	2	0.327869
1965	3	37067076	Intron 11-12	TATATA	-	-	610	19	3.11475
1966	3	37067076	Intron 11-12	TATA	-	-	610	11	1.80328
1967	3	37067076	Intron 11-12	TATATATA	-	-	610	10	1.63934
1968	3	37067090	Intron 11-12	ATA	-	-	10409	2	0.0192141
1969	3	37067093	Intron 11-12	A	-	rs748227672	4302	12	0.27894
1970	3	37067093	Intron 11-12	ATA	-	rs773376086	4302	2	0.04649
1971	3	37067093	Intron 11-12	-	TT	-	4302	2	0.04649
1972	3	37067094	Intron 11-12	TATATATT	-	rs766706153	4302	4	0.09298
1973	3	37067095	Intron 11-12	TATATTT	-	-	2657	26	0.978547
1974	3	37067095	Intron 11-12	TATATTTTTTT	-	-	2657	1	0.0376364
1975	3	37067095	Intron 11-12	A	-	rs768143505	4302	33	0.767085
1976	3	37067096	Intron 11-12	TATATTT	-	rs563315461	4302	2	0.04649
1977	3	37067096	Intron 11-12	TATATTTTTTT	-	-	4302	2	0.04649
1978	3	37067096	Intron 11-12	TATATTTT	-	rs755745938	4302	2	0.04649
1979	3	37067097	Intron 11-12	A	-	rs756911937	4302	94	2.18503
1980	3	37067097	Intron 11-12	A	0	-	4302	72	1.67364
1981	3	37067097	Intron 11-12	A	T	rs59684491	4912	155	3.15554
1982	3	37067097	Intron 11-12	ATA	-	rs778381149	4302	2	0.04649
1983	3	37067099	Intron 11-12	A	T	rs6771325	4912	414	8.42834
1984	3	37067099	Intron 11-12	A	0	-	4302	32	0.74384
1985	3	37067099	Intron 11-12	ATTTT	0	-	4302	1	0.023245
1986	3	37067099	Intron 11-12	-	TTTT	rs771220960	4302	6	0.13947
1987	3	37067099	Intron 11-12	-	TTT	rs535965616	4302	2	0.04649
1988	3	37067099	Intron 11-12	A	-	rs746933807	4302	2	0.04649
1989	3	37067099	Intron 11-12	-	TT	rs535965616	4302	2	0.04649
1990	3	37067100	Intron 11-12	TTT	-	rs769807298	610	1	0.163934
1991	3	37067103	Intron 11-12	-	TTTT	-	4302	1	0.023245
1992	3	37067120	Intron 11-12	T	A	rs193922367	3357	93	2.77033
1993	3	37067120	Intron 11-12	-	TA	rs535965616	4302	91	2.1153
1994	3	37067120	Intron 11-12	-	A	rs535965616	4302	10	0.23245
1995	3	37067121	Intron 11-12	AATACAGAC	-	-	610	1	0.163934
1996	3	37067123	Intron 11-12	T	C	rs587782626	10587	1	0.00944555
1997	3	37067501	Intron 12-13	A	G	rs780517601	10588	1	0.00944465
1998	3	37067516	Intron 12-13	A	G	rs776796409	10588	1	0.00944465
[truncated: 1,418 more rows]

## Sheet: MSH2
Table S3B. Non-coding variants of MSH2 in general Chinese population
No.	Chr	Position	Mutation Type	Ref. (NM_000251.2)	Alt	dbSNP150	Case Number	Carrier Number	Carrier Rate (%)
1	2	47628204	UTR5	AAAC	-	-	10588	5.5	0.0519456
2	2	47628236	UTR5	G	C	-	10588	2	0.0188893
3	2	47628284	UTR5	-	C	rs138035064	10588	1447.5	13.6711
4	2	47628284	UTR5	C	-	-	10588	1.5	0.014167
5	2	47628284	UTR5	-	CC	-	10588	5	0.0472233
6	2	47628287	UTR5	C	G	rs112748009	10587	1	0.00944555
7	2	47628289	UTR5	C	T	rs12612908	10588	114.5	1.08141
8	2	47628334	UTR5	C	G	-	10588	1	0.00944465
9	2	47628365	UTR5	G	A	-	10588	1	0.00944465
10	2	47628370	UTR5	A	T	-	10588	1	0.00944465
11	2	47628379	UTR5	-	A	-	10581	1	0.0094509
12	2	47628409	UTR5	G	-	-	10588	1	0.00944465
13	2	47628413	UTR5	G	A	rs181625963	10588	1.5	0.014167
14	2	47628420	UTR5	C	G	-	10588	6.5	0.0613903
15	2	47628441	UTR5	C	A	-	10588	1	0.00944465
16	2	47628449	UTR5	C	T	-	10588	1	0.00944465
17	2	47628455	UTR5	C	G	rs914808109	10588	1	0.00944465
18	2	47628456	UTR5	G	A	rs36225899	10588	1407.5	13.2934
19	2	47628474	UTR5	C	T	-	10588	1	0.00944465
20	2	47628477	UTR5	C	G	-	10588	1	0.00944465
21	2	47628478	UTR5	C	A	rs928730154	10588	1	0.00944465
22	2	47628482	UTR5	G	A	-	10588	1	0.00944465
23	2	47628493	UTR5	T	G	-	10588	1	0.00944465
24	2	47628504	UTR5	A	T	-	10588	1	0.00944465
25	2	47628537	UTR5	C	T	rs1048367980	10588	1	0.00944465
26	2	47628548	UTR5	G	A	-	10588	1	0.00944465
27	2	47628554	UTR5	T	A	-	10588	1	0.00944465
28	2	47628574	UTR5	G	C	-	10588	1	0.00944465
29	2	47628609	UTR5	C	T	-	10588	1	0.00944465
30	2	47628613	UTR5	C	T	-	10588	1	0.00944465
31	2	47628615	UTR5	C	A	-	10588	1	0.00944465
32	2	47628636	UTR5	C	G	-	10588	1	0.00944465
33	2	47628680	UTR5	G	A	-	10588	1	0.00944465
34	2	47628686	UTR5	G	T	-	10588	1	0.00944465
35	2	47628687	UTR5	G	T	-	10588	1	0.00944465
36	2	47628692	UTR5	C	G	-	10588	1	0.00944465
37	2	47628708	UTR5	G	A	-	10588	1	0.00944465
38	2	47628753	UTR5	T	C	-	10588	6.5	0.0613903
39	2	47628757	UTR5	A	T	-	10588	1	0.00944465
40	2	47628777	UTR5	G	-	-	10588	1	0.00944465
41	2	47628777	UTR5	-	A	-	10588	1	0.00944465
42	2	47628796	UTR5	C	T	-	10588	1	0.00944465
43	2	47628800	UTR5	G	T	rs560542105	10588	1.5	0.014167
44	2	47628806	UTR5	G	A	rs572631223	10588	4	0.0377786
45	2	47628815	UTR5	C	A	-	10588	1	0.00944465
46	2	47628821	UTR5	C	T	rs900871161	10588	2	0.0188893
47	2	47628824	UTR5	C	G	rs6757310	10588	8412.5	79.4532
48	2	47628836	UTR5	C	T	-	10588	1	0.00944465
49	2	47628841	UTR5	A	G	-	10588	1	0.00944465
50	2	47628853	UTR5	C	G	-	10588	1	0.00944465
51	2	47628902	UTR5	C	T	-	10588	1	0.00944465
52	2	47628906	UTR5	C	T	rs960093263	10588	1	0.00944465
53	2	47628926	UTR5	G	A	-	10588	1	0.00944465
54	2	47628927	UTR5	T	A	-	10588	1	0.00944465
55	2	47628958	UTR5	T	A	rs186154189	10588	6.5	0.0613903
56	2	47628972	UTR5	T	C	rs148564380	10588	53	0.500567
57	2	47629018	UTR5	C	T	rs946506325	10588	1	0.00944465
58	2	47629033	UTR5	C	T	rs906068040	10588	1	0.00944465
59	2	47629036	UTR5	G	C	-	10588	1	0.00944465
60	2	47629039	UTR5	C	T	rs575626756	10588	1	0.00944465
61	2	47629078	UTR5	A	G	rs952690099	10588	1	0.00944465
62	2	47629083	UTR5	C	T	-	10588	1	0.00944465
63	2	47629108	UTR5	-	C	rs998011507	10588	1	0.00944465
64	2	47629111	UTR5	C	G	-	10588	1	0.00944465
65	2	47629112	UTR5	C	A	rs1018359337	10588	1.5	0.014167
66	2	47629113	UTR5	C	A	rs765340105	10588	1	0.00944465
67	2	47629113	UTR5	C	G	-	10588	1	0.00944465
68	2	47629115	UTR5	C	T	-	10588	2	0.0188893
69	2	47629115	UTR5	C	A	-	10588	1	0.00944465
70	2	47629133	UTR5	G	C	rs988070897	10588	1	0.00944465
71	2	47629139	UTR5	T	C	-	10588	11.5	0.108614
72	2	47629151	UTR5	C	T	-	10588	1	0.00944465
73	2	47629163	UTR5	G	T	-	10588	1	0.00944465
74	2	47629170	UTR5	T	C	rs191109514	10588	4	0.0377786
75	2	47629192	UTR5	T	C	-	10588	1	0.00944465
76	2	47629211	UTR5	T	C	-	10588	3.5	0.0330563
77	2	47629214	UTR5	C	G	-	10588	1	0.00944465
78	2	47629240	UTR5	T	C	rs543256111	10588	2	0.0188893
79	2	47629252	UTR5	C	T	-	10588	1	0.00944465
80	2	47629267	UTR5	A	G	-	10588	1	0.00944465
81	2	47629271	UTR5	T	A	-	10588	1	0.00944465
82	2	47629273	UTR5	T	A	-	10588	1	0.00944465
83	2	47629319	UTR5	A	C	rs17217674	10588	21.5	0.20306
84	2	47629326	UTR5	C	T	-	10588	1	0.00944465
85	2	47629342	UTR5	A	-	-	10588	1	0.00944465
86	2	47629360	UTR5	C	T	-	10588	1	0.00944465
87	2	47629366	UTR5	G	A	-	10588	1	0.00944465
88	2	47629376	UTR5	C	T	rs532790698	10588	7.5	0.0708349
89	2	47629381	UTR5	C	G	-	10588	1	0.00944465
90	2	47629384	UTR5	C	-	-	10588	1	0.00944465
91	2	47629412	UTR5	G	A	-	10588	1	0.00944465
92	2	47629413	UTR5	-	TAA	-	10588	1	0.00944465
93	2	47629417	UTR5	T	C	-	10588	1	0.00944465
94	2	47629423	UTR5	G	A	rs527491734	10588	2.5	0.0236116
95	2	47629432	UTR5	A	T	-	10588	1	0.00944465
96	2	47629433	UTR5	C	T	-	10588	13	0.122781
97	2	47629444	UTR5	C	A	-	10588	1	0.00944465
98	2	47629446	UTR5	A	G	-	10588	1	0.00944465
99	2	47629452	UTR5	C	T	-	10588	1	0.00944465
100	2	47629490	UTR5	C	T	-	10588	1	0.00944465
101	2	47629504	UTR5	C	T	rs549170359	10588	1	0.00944465
102	2	47629507	UTR5	A	G	-	10588	1	0.00944465
103	2	47629512	UTR5	C	T	rs899830660	10588	1	0.00944465
104	2	47629536	UTR5	G	A	-	10588	1	0.00944465
105	2	47629541	UTR5	C	G	-	10588	1	0.00944465
106	2	47629544	UTR5	C	T	-	10588	1	0.00944465
107	2	47629554	UTR5	A	G	-	10588	1	0.00944465
108	2	47629571	UTR5	A	G	rs199600138	10588	5.5	0.0519456
109	2	47629596	UTR5	A	G	-	10588	1	0.00944465
110	2	47629604	UTR5	T	C	rs1863333	10588	8509	80.3646
111	2	47629616	UTR5	G	C	-	10588	1	0.00944465
112	2	47629617	UTR5	A	G	-	10588	1	0.00944465
113	2	47629639	UTR5	T	C	-	10588	1	0.00944465
114	2	47629658	UTR5	C	T	-	10588	1	0.00944465
115	2	47629661	UTR5	T	G	-	10588	1	0.00944465
116	2	47629677	UTR5	G	C	-	10588	1	0.00944465
117	2	47629706	UTR5	G	A	-	10588	3	0.028334
118	2	47629707	UTR5	T	G	-	4302	2	0.04649
119	2	47629748	UTR5	A	G	-	10588	1	0.00944465
120	2	47629764	UTR5	G	A	-	10588	1	0.00944465
121	2	47629766	UTR5	A	G	-	10588	1	0.00944465
122	2	47629793	UTR5	G	A	-	4302	4	0.09298
123	2	47629800	UTR5	C	A	rs1051631636	4302	2	0.04649
124	2	47629801	UTR5	G	A	rs536401998	4302	2	0.04649
125	2	47629805	UTR5	T	C	-	10588	1	0.00944465
126	2	47629833	UTR5	A	G	-	14890	4.5	0.0302216
127	2	47629849	UTR5	G	T	-	10588	3.5	0.0330563
128	2	47629854	UTR5	C	G	-	10588	6	0.0566679
129	2	47629862	UTR5	C	G	-	4302	2	0.04649
130	2	47629871	UTR5	GGA	-	-	10588	1	0.00944465
131	2	47629883	UTR5	A	G	-	10588	1	0.00944465
132	2	47629891	UTR5	T	-	rs544188883	4302	1926	44.7699
133	2	47629898	UTR5	T	G	rs1863332	4302	741	17.2245
134	2	47629914	UTR5	C	G	-	10588	2	0.0188893
135	2	47629945	UTR5	A	G	-	10588	1	0.00944465
136	2	47629964	UTR5	C	T	rs182414800	10588	13	0.122781
137	2	47629966	UTR5	G	A	-	10588	1	0.00944465
138	2	47629985	UTR5	G	C	-	10588	3	0.028334
139	2	47629992	UTR5	-	C	-	10588	19	0.179448
140	2	47630010	UTR5	C	A	-	4302	4	0.09298
141	2	47630013	UTR5	A	T	rs527599397	10588	1	0.00944465
142	2	47630017	UTR5	G	T	-	4302	2	0.04649
143	2	47630026	UTR5	C	A	-	10588	1	0.00944465
144	2	47630045	UTR5	A	T	rs786202645	14890	29	0.194762
145	2	47630064	UTR5	G	A	-	10588	1	0.00944465
146	2	47630068	UTR5	C	G	rs876659014	10588	1	0.00944465
147	2	47630073	UTR5	C	T	-	10588	1	0.00944465
148	2	47630074	UTR5	T	C	-	10588	1	0.00944465
149	2	47630076	UTR5	C	A	rs532504901	10588	1	0.00944465
150	2	47630086	UTR5	C	G	-	10588	1	0.00944465
151	2	47630088	UTR5	C	T	rs547781398	10588	1	0.00944465
152	2	47630106	UTR5	G	C	rs138068023	14890	52.5	0.352586
153	2	47630549	Intron 1-2	C	T	rs267607916	14890	10	0.0671592
154	2	47630550	Intron 1-2	C	G	rs2303426	18844	12303.5	65.2913
155	2	47630550	Intron 1-2	C	A	rs2303426	11198	7	0.0625112
156	2	47630557	Intron 1-2	G	T	-	10588	1	0.00944465
157	2	47630572	Intron 1-2	G	C	-	13245	3.5	0.0264251
158	2	47630575	Intron 1-2	C	G	rs760431719	10588	1	0.00944465
159	2	47630593	Intron 1-2	G	A	-	10588	1	0.00944465
160	2	47630594	Intron 1-2	G	A	-	10588	2.5	0.0236116
161	2	47630602	Intron 1-2	C	G	-	10588	2	0.0188893
162	2	47630603	Intron 1-2	C	T	-	10588	1	0.00944465
163	2	47630605	Intron 1-2	G	A	-	10588	1	0.00944465
164	2	47630609	Intron 1-2	C	T	-	10588	1	0.00944465
165	2	47630613	Intron 1-2	G	A	-	13245	6.5	0.0490751
166	2	47630631	Intron 1-2	C	T	rs535917605	10588	1	0.00944465
167	2	47630638	Intron 1-2	G	C	-	10588	1	0.00944465
168	2	47630639	Intron 1-2	T	C	rs3815865	14542	11227	77.204
169	2	47630653	Intron 1-2	G	T	-	610	1	0.163934
170	2	47630657	Intron 1-2	G	A	-	10588	1	0.00944465
171	2	47630660	Intron 1-2	C	A	-	10588	1	0.00944465
172	2	47630661	Intron 1-2	G	T	-	13245	8.5	0.0641752
173	2	47630666	Intron 1-2	T	C	-	10588	1	0.00944465
174	2	47630677	Intron 1-2	A	G	rs565095530	10588	1	0.00944465
175	2	47630687	Intron 1-2	C	T	rs576989398	10588	2.5	0.0236116
176	2	47630690	Intron 1-2	C	T	rs963228834	13245	42.5	0.320876
177	2	47630696	Intron 1-2	C	T	-	2657	1	0.0376364
178	2	47630698	Intron 1-2	G	A	-	10588	1	0.00944465
179	2	47630717	Intron 1-2	C	T	-	10588	1	0.00944465
180	2	47630718	Intron 1-2	C	G	rs535233062	10588	1.5	0.014167
181	2	47630721	Intron 1-2	C	A	-	10588	1	0.00944465
182	2	47630726	Intron 1-2	G	C	-	10588	1	0.00944465
183	2	47630760	Intron 1-2	T	C	-	10588	1.5	0.014167
184	2	47630764	Intron 1-2	A	T	-	10588	1.5	0.014167
185	2	47630772	Intron 1-2	A	G	-	10588	1	0.00944465
186	2	47630780	Intron 1-2	G	A	-	10588	1	0.00944465
187	2	47630785	Intron 1-2	T	C	-	610	1	0.163934
188	2	47630790	Intron 1-2	C	G	-	10588	1	0.00944465
189	2	47630796	Intron 1-2	A	G	-	13245	8	0.0604002
190	2	47630799	Intron 1-2	C	T	-	13245	2	0.0151
191	2	47630808	Intron 1-2	G	A	-	10588	1	0.00944465
192	2	47630810	Intron 1-2	A	T	-	10588	1	0.00944465
193	2	47630839	Intron 1-2	A	G	-	10588	1	0.00944465
194	2	47630839	Intron 1-2	A	T	-	10588	1	0.00944465
195	2	47630860	Intron 1-2	T	C	-	10588	1	0.00944465
196	2	47630864	Intron 1-2	G	A	-	10588	1	0.00944465
197	2	47630876	Intron 1-2	A	C	-	13245	2	0.0151
198	2	47630883	Intron 1-2	C	T	-	2657	1	0.0376364
199	2	47630883	Intron 1-2	C	G	-	10588	1	0.00944465
200	2	47630890	Intron 1-2	C	G	rs17224129	13245	8	0.0604002
201	2	47630890	Intron 1-2	C	T	-	10588	1	0.00944465
202	2	47630896	Intron 1-2	T	C	rs569935517	13245	27.5	0.207626
203	2	47630934	Intron 1-2	T	G	-	2657	1	0.0376364
204	2	47630941	Intron 1-2	T	G	-	10588	3	0.028334
205	2	47630945	Intron 1-2	G	A	-	10588	1	0.00944465
206	2	47630951	Intron 1-2	C	G	rs967029924	10588	1	0.00944465
207	2	47630956	Intron 1-2	A	G	-	10588	1	0.00944465
208	2	47630960	Intron 1-2	C	T	-	10588	1	0.00944465
209	2	47630961	Intron 1-2	A	C	-	10588	1	0.00944465
210	2	47630972	Intron 1-2	C	T	-	10588	1	0.00944465
211	2	47630977	Intron 1-2	A	C	-	10588	1	0.00944465
212	2	47630986	Intron 1-2	C	G	-	2657	1	0.0376364
213	2	47630997	Intron 1-2	G	A	rs1047106700	13245	8.5	0.0641752
214	2	47630999	Intron 1-2	C	G	-	10588	4	0.0377786
215	2	47631001	Intron 1-2	G	C	-	13245	2	0.0151
216	2	47631001	Intron 1-2	G	T	rs192822873	13335	115.5	0.866142
217	2	47631070	Intron 1-2	C	T	-	10588	3	0.028334
218	2	47631091	Intron 1-2	G	C	rs142758375	10588	1	0.00944465
219	2	47631096	Intron 1-2	A	C	rs1032672180	10588	1	0.00944465
220	2	47631100	Intron 1-2	G	T	-	13245	12.5	0.0943752
221	2	47631105	Intron 1-2	C	T	rs137930727	610	1	0.163934
222	2	47631107	Intron 1-2	C	G	-	10588	1	0.00944465
223	2	47631113	Intron 1-2	T	A	-	10588	1	0.00944465
224	2	47631119	Intron 1-2	A	T	-	10588	1	0.00944465
225	2	47631129	Intron 1-2	T	C	rs201234484	10588	1	0.00944465
226	2	47631142	Intron 1-2	G	A	-	10588	2	0.0188893
227	2	47631149	Intron 1-2	A	G	rs115153578	10588	1	0.00944465
228	2	47631151	Intron 1-2	C	G	rs546080051	10588	1	0.00944465
229	2	47631160	Intron 1-2	C	T	-	10588	1.5	0.014167
230	2	47631167	Intron 1-2	T	G	-	10588	1	0.00944465
231	2	47631186	Intron 1-2	C	A	-	10588	1	0.00944465
232	2	47631187	Intron 1-2	G	T	-	13245	10.5	0.0792752
233	2	47631189	Intron 1-2	C	T	rs150914447	13335	96	0.71991
234	2	47631207	Intron 1-2	A	G	rs139398105	10588	1	0.00944465
235	2	47631210	Intron 1-2	T	G	-	10588	1	0.00944465
236	2	47631211	Intron 1-2	C	T	-	10588	1	0.00944465
237	2	47631233	Intron 1-2	C	G	-	10588	1	0.00944465
238	2	47631237	Intron 1-2	C	G	-	10588	1	0.00944465
239	2	47631238	Intron 1-2	C	T	-	10588	1	0.00944465
240	2	47631281	Intron 1-2	C	T	-	10588	1	0.00944465
241	2	47631312	Intron 1-2	C	T	-	13245	3	0.0226501
242	2	47631318	Intron 1-2	A	C	-	10588	1	0.00944465
243	2	47631342	Intron 1-2	C	A	-	10588	1.5	0.014167
244	2	47631352	Intron 1-2	C	T	rs10179950	14542	11052	76.0006
245	2	47631366	Intron 1-2	C	G	-	2657	1	0.0376364
246	2	47631366	Intron 1-2	C	T	rs930646814	10588	1	0.00944465
247	2	47631369	Intron 1-2	G	A	-	10588	1	0.00944465
248	2	47631381	Intron 1-2	G	C	-	10588	1	0.00944465
249	2	47631419	Intron 1-2	T	A	rs546526280	2657	1	0.0376364
250	2	47631420	Intron 1-2	C	A	rs568323403	2657	1	0.0376364
251	2	47631434	Intron 1-2	A	G	-	2657	1	0.0376364
252	2	47631450	Intron 1-2	T	-	-	10588	1	0.00944465
253	2	47631455	Intron 1-2	G	A	-	10588	1	0.00944465
254	2	47631459	Intron 1-2	A	C	-	10588	1	0.00944465
255	2	47631467	Intron 1-2	A	T	-	10588	1	0.00944465
256	2	47631471	Intron 1-2	A	T	-	10588	1	0.00944465
257	2	47631484	Intron 1-2	A	G	rs557074704	10588	1	0.00944465
258	2	47631485	Intron 1-2	C	T	rs575232953	13245	6.5	0.0490751
259	2	47631489	Intron 1-2	C	T	-	2657	1	0.0376364
260	2	47631490	Intron 1-2	A	G	-	10588	1	0.00944465
261	2	47631498	Intron 1-2	C	T	rs73927791	13245	2	0.0151
262	2	47631500	Intron 1-2	C	T	-	10588	1	0.00944465
263	2	47631530	Intron 1-2	A	G	rs564763325	10588	3	0.028334
264	2	47631546	Intron 1-2	T	A	rs140108598	13335	116.5	0.873641
265	2	47631557	Intron 1-2	G	A	-	10588	2	0.0188893
266	2	47631560	Intron 1-2	T	G	-	10588	1	0.00944465
267	2	47631603	Intron 1-2	G	A	rs143695414	13335	116.5	0.873641
268	2	47631604	Intron 1-2	G	A	rs564297524	2657	2	0.0752729
269	2	47631617	Intron 1-2	G	A	-	10588	1	0.00944465
270	2	47631661	Intron 1-2	C	T	-	10588	1	0.00944465
271	2	47631664	Intron 1-2	G	T	rs75115149	10588	1	0.00944465
272	2	47631664	Intron 1-2	G	C	-	10588	1	0.00944465
273	2	47631665	Intron 1-2	T	G	-	10588	1	0.00944465
274	2	47631668	Intron 1-2	A	C	-	10588	1	0.00944465
275	2	47631671	Intron 1-2	T	-	-	10588	1	0.00944465
276	2	47631682	Intron 1-2	A	G	-	10588	1	0.00944465
277	2	47631710	Intron 1-2	C	T	rs892959277	10588	1	0.00944465
278	2	47631723	Intron 1-2	C	A	-	10588	1	0.00944465
279	2	47631724	Intron 1-2	G	C	-	10588	1	0.00944465
280	2	47631724	Intron 1-2	G	A	-	10588	1	0.00944465
281	2	47631754	Intron 1-2	C	T	-	2657	1	0.0376364
282	2	47631771	Intron 1-2	A	T	-	10588	1	0.00944465
283	2	47631777	Intron 1-2	C	G	-	10588	1	0.00944465
284	2	47631782	Intron 1-2	G	A	-	10588	1	0.00944465
285	2	47631806	Intron 1-2	T	C	-	13245	6	0.0453001
286	2	47631821	Intron 1-2	G	A	-	10588	1	0.00944465
287	2	47631829	Intron 1-2	T	A	rs561416834	10588	1	0.00944465
288	2	47631842	Intron 1-2	TG	-	-	10567	21.5	0.203464
289	2	47631843	Intron 1-2	G	-	-	10527	1.5	0.0142491
290	2	47631844	Intron 1-2	G	T	rs952298701	2657	1	0.0376364
291	2	47631844	Intron 1-2	T	-	-	10587	5740	54.2174
292	2	47631844	Intron 1-2	TT	-	-	10587	605	5.71456
293	2	47631844	Intron 1-2	-	T	-	10587	1425	13.4599
294	2	47631844	Intron 1-2	-	TT	-	10587	29	0.273921
295	2	47631844	Intron 1-2	TTTT	-	-	10587	12	0.113347
296	2	47631844	Intron 1-2	TTT	-	-	10587	53.5	0.505337
297	2	47631844	Intron 1-2	TTTTT	-	-	10587	3	0.0283366
298	2	47631848	Intron 1-2	T	G	-	2657	1	0.0376364
299	2	47631865	Intron 1-2	G	C	-	10588	1	0.00944465
300	2	47631903	Intron 1-2	T	-	-	10588	1	0.00944465
301	2	47631912	Intron 1-2	T	C	rs112547821	10588	1	0.00944465
302	2	47631914	Intron 1-2	C	T	-	10588	2	0.0188893
303	2	47631923	Intron 1-2	T	A	rs550143503	10588	1.5	0.014167
304	2	47631949	Intron 1-2	C	T	rs142778618	10588	2	0.0188893
305	2	47631957	Intron 1-2	C	A	-	10588	1	0.00944465
306	2	47631958	Intron 1-2	T	G	rs560657612	13245	77.5	0.585126
307	2	47631961	Intron 1-2	C	T	-	10588	1	0.00944465
308	2	47631968	Intron 1-2	A	T	rs574278848	10588	1	0.00944465
309	2	47631971	Intron 1-2	G	A	rs374023815	10588	1	0.00944465
310	2	47631971	Intron 1-2	G	C	-	10588	1	0.00944465
311	2	47631972	Intron 1-2	G	A	-	10588	1	0.00944465
312	2	47631976	Intron 1-2	A	G	-	10588	1	0.00944465
313	2	47631983	Intron 1-2	A	T	-	10588	1	0.00944465
314	2	47631993	Intron 1-2	C	G	rs535395059	10588	1	0.00944465
315	2	47631993	Intron 1-2	C	T	-	10588	1	0.00944465
316	2	47631994	Intron 1-2	G	A	-	2657	2	0.0752729
317	2	47631997	Intron 1-2	C	T	rs199932642	10588	1	0.00944465
318	2	47632003	Intron 1-2	C	T	rs995284046	10588	1	0.00944465
319	2	47632006	Intron 1-2	C	G	-	10588	5	0.0472233
320	2	47632008	Intron 1-2	A	G	-	10588	1	0.00944465
321	2	47632028	Intron 1-2	G	A	-	2657	1	0.0376364
322	2	47632043	Intron 1-2	C	T	-	10588	1	0.00944465
323	2	47632047	Intron 1-2	A	G	-	2657	6	0.225819
324	2	47632053	Intron 1-2	G	C	-	13245	4	0.0302001
325	2	47632057	Intron 1-2	G	T	-	10588	5	0.0472233
326	2	47632063	Intron 1-2	T	G	-	10588	1	0.00944465
327	2	47632070	Intron 1-2	C	T	rs563331383	13245	3.5	0.0264251
328	2	47632078	Intron 1-2	C	T	rs552122958	10588	1	0.00944465
329	2	47632091	Intron 1-2	C	G	-	10588	1	0.00944465
330	2	47632104	Intron 1-2	C	G	-	13335	6.5	0.0487439
331	2	47632106	Intron 1-2	C	T	rs1034418442	13245	7.5	0.0566251
332	2	47632107	Intron 1-2	G	T	-	10588	1.5	0.014167
333	2	47632117	Intron 1-2	G	T	-	10588	1	0.00944465
334	2	47632125	Intron 1-2	G	T	-	2657	1	0.0376364
335	2	47632137	Intron 1-2	G	T	rs1036937572	10588	1	0.00944465
336	2	47632141	Intron 1-2	C	T	-	10588	1	0.00944465
337	2	47632142	Intron 1-2	-	G	-	10588	1	0.00944465
338	2	47632151	Intron 1-2	T	C	-	10588	1	0.00944465
339	2	47632161	Intron 1-2	A	C	-	10588	1	0.00944465
340	2	47632175	Intron 1-2	C	G	-	10588	1	0.00944465
341	2	47632181	Intron 1-2	G	A	rs114584849	10588	1	0.00944465
342	2	47632184	Intron 1-2	C	A	rs535233640	10588	1.5	0.014167
343	2	47632185	Intron 1-2	G	A	-	10588	1	0.00944465
344	2	47632190	Intron 1-2	G	C	-	10588	1	0.00944465
345	2	47632191	Intron 1-2	A	T	-	10588	1	0.00944465
346	2	47632195	Intron 1-2	A	G	-	10588	1	0.00944465
347	2	47632197	Intron 1-2	G	A	rs528651575	10588	2	0.0188893
348	2	47632233	Intron 1-2	C	A	-	10588	1	0.00944465
349	2	47632234	Intron 1-2	G	T	-	13245	2	0.0151
350	2	47632241	Intron 1-2	A	G	-	2657	1	0.0376364
351	2	47632254	Intron 1-2	C	G	-	10588	1	0.00944465
352	2	47632255	Intron 1-2	A	C	-	2657	1	0.0376364
353	2	47632268	Intron 1-2	C	T	-	2657	1	0.0376364
354	2	47632274	Intron 1-2	T	C	-	2657	1	0.0376364
355	2	47632275	Intron 1-2	G	T	-	2657	1	0.0376364
356	2	47632282	Intron 1-2	C	A	-	10588	1	0.00944465
357	2	47632304	Intron 1-2	A	C	-	2657	1	0.0376364
358	2	47632329	Intron 1-2	A	G	-	2657	1	0.0376364
359	2	47632334	Intron 1-2	G	C	-	2657	2	0.0752729
360	2	47632336	Intron 1-2	C	T	rs997619156	13245	14	0.1057
361	2	47632341	Intron 1-2	C	G	-	2657	1	0.0376364
362	2	47632343	Intron 1-2	C	T	-	10588	1	0.00944465
363	2	47632344	Intron 1-2	G	T	-	10588	1	0.00944465
364	2	47632344	Intron 1-2	G	A	-	10588	1	0.00944465
365	2	47632366	Intron 1-2	C	T	rs147824998	10588	1	0.00944465
366	2	47632367	Intron 1-2	C	T	rs564254687	13245	38.5	0.290676
367	2	47632370	Intron 1-2	G	T	-	10588	1	0.00944465
368	2	47632377	Intron 1-2	TG	-	-	10588	1	0.00944465
369	2	47632385	Intron 1-2	C	T	-	10588	1	0.00944465
370	2	47632386	Intron 1-2	C	G	-	10588	2	0.0188893
371	2	47632387	Intron 1-2	C	T	-	10588	1.5	0.014167
372	2	47632403	Intron 1-2	T	C	rs535982776	10588	1.5	0.014167
373	2	47632410	Intron 1-2	A	C	-	10588	1	0.00944465
374	2	47632413	Intron 1-2	T	C	-	10588	1	0.00944465
375	2	47632416	Intron 1-2	C	G	rs959873588	13245	7.5	0.0566251
376	2	47632422	Intron 1-2	G	A	-	10588	1	0.00944465
377	2	47632424	Intron 1-2	G	A	rs377756678	10588	1.5	0.014167
378	2	47632425	Intron 1-2	G	A	rs141305739	10588	1	0.00944465
379	2	47632429	Intron 1-2	C	T	-	2657	1	0.0376364
380	2	47632435	Intron 1-2	T	C	rs548146654	13245	2.5	0.018875
381	2	47632442	Intron 1-2	T	G	-	10588	1	0.00944465
382	2	47632443	Intron 1-2	C	T	-	13245	2	0.0151
383	2	47632444	Intron 1-2	C	T	-	10588	1	0.00944465
384	2	47632445	Intron 1-2	C	T	-	10588	1	0.00944465
385	2	47632448	Intron 1-2	C	G	rs942365756	10588	1.5	0.014167
386	2	47632462	Intron 1-2	G	A	-	2657	1	0.0376364
387	2	47632468	Intron 1-2	G	A	-	2657	1	0.0376364
388	2	47632474	Intron 1-2	T	C	-	10588	1	0.00944465
389	2	47632475	Intron 1-2	G	C	-	2657	1	0.0376364
390	2	47632477	Intron 1-2	T	C	rs758918272	2657	1	0.0376364
391	2	47632478	Intron 1-2	G	T	-	2657	1	0.0376364
392	2	47632481	Intron 1-2	A	T	-	10588	1	0.00944465
393	2	47632483	Intron 1-2	C	T	rs922329034	2657	1	0.0376364
394	2	47632485	Intron 1-2	C	T	rs181846094	10588	1	0.00944465
395	2	47632485	Intron 1-2	C	G	-	10588	1	0.00944465
396	2	47632486	Intron 1-2	G	A	rs765952753	13245	7	0.0528501
397	2	47632488	Intron 1-2	A	G	-	2657	1	0.0376364
398	2	47632491	Intron 1-2	G	A	-	10588	3	0.028334
399	2	47632497	Intron 1-2	C	G	rs918334471	2657	1	0.0376364
400	2	47632497	Intron 1-2	C	T	-	10588	1	0.00944465
401	2	47632509	Intron 1-2	C	T	-	10588	2	0.0188893
402	2	47632510	Intron 1-2	G	A	-	2657	1	0.0376364
403	2	47632511	Intron 1-2	G	-	-	10588	1	0.00944465
404	2	47632512	Intron 1-2	G	C	-	13245	2	0.0151
405	2	47632522	Intron 1-2	C	G	-	10588	5	0.0472233
406	2	47632533	Intron 1-2	C	T	-	10588	1	0.00944465
407	2	47632534	Intron 1-2	C	T	rs188940802	10588	2	0.0188893
408	2	47632542	Intron 1-2	C	T	-	10588	1	0.00944465
409	2	47632545	Intron 1-2	A	C	-	10588	1	0.00944465
410	2	47632547	Intron 1-2	C	T	-	10588	1.5	0.014167
411	2	47632548	Intron 1-2	G	A	rs868523774	10588	1	0.00944465
412	2	47632560	Intron 1-2	C	A	rs865818249	2657	36	1.35491
413	2	47632560	Intron 1-2	AAAAAAAA	-	-	2657	7	0.263455
414	2	47632594	Intron 1-2	A	G	-	2657	23	0.865638
415	2	47632600	Intron 1-2	T	A	rs751944454	10588	1	0.00944465
416	2	47632631	Intron 1-2	C	T	rs555812170	13245	5	0.0377501
417	2	47632640	Intron 1-2	A	C	-	10588	1	0.00944465
418	2	47632649	Intron 1-2	T	A	rs922266993	10588	4	0.0377786
419	2	47632662	Intron 1-2	G	A	-	13245	4.5	0.0339751
420	2	47632672	Intron 1-2	A	C	-	2657	1	0.0376364
421	2	47632679	Intron 1-2	G	C	rs370175651	13245	7	0.0528501
422	2	47632680	Intron 1-2	A	G	-	10588	1	0.00944465
423	2	47632696	Intron 1-2	G	A	rs578108300	10588	1	0.00944465
424	2	47632707	Intron 1-2	C	T	rs947555747	10588	6.5	0.0613903
425	2	47632754	Intron 1-2	C	T	rs545585600	13245	5	0.0377501
426	2	47632754	Intron 1-2	C	G	-	10588	1	0.00944465
427	2	47632758	Intron 1-2	T	G	-	10588	1	0.00944465
428	2	47632764	Intron 1-2	G	A	-	10588	1	0.00944465
429	2	47632786	Intron 1-2	G	C	-	13245	5.5	0.0415251
430	2	47632803	Intron 1-2	TATT	-	-	2657	1	0.0376364
431	2	47632831	Intron 1-2	C	T	rs1018618517	10588	1	0.00944465
432	2	47632837	Intron 1-2	A	G	-	10588	1	0.00944465
433	2	47632889	Intron 1-2	G	C	-	2657	1	0.0376364
434	2	47632890	Intron 1-2	G	C	rs1029311366	10588	1	0.00944465
435	2	47632900	Intron 1-2	G	T	-	10588	2	0.0188893
436	2	47632937	Intron 1-2	G	A	rs370769515	13245	7	0.0528501
437	2	47632948	Intron 1-2	C	G	rs374095267	13245	10.5	0.0792752
438	2	47632958	Intron 1-2	C	G	rs146961704	10588	1	0.00944465
439	2	47632959	Intron 1-2	T	A	-	10588	1	0.00944465
440	2	47632963	Intron 1-2	A	T	-	10588	1	0.00944465
441	2	47632984	Intron 1-2	T	C	-	10588	1	0.00944465
442	2	47632989	Intron 1-2	G	T	-	10588	1	0.00944465
443	2	47632990	Intron 1-2	G	A	-	10588	1	0.00944465
444	2	47633012	Intron 1-2	G	T	-	13245	11.5	0.0868252
445	2	47633020	Intron 1-2	T	C	rs114188719	13932	2077.5	14.9117
446	2	47633024	Intron 1-2	C	T	-	10588	1	0.00944465
447	2	47633026	Intron 1-2	T	C	-	10588	2	0.0188893
448	2	47633032	Intron 1-2	G	C	rs956386037	10588	1	0.00944465
449	2	47633034	Intron 1-2	CTC	-	-	13245	2	0.0151
450	2	47633035	Intron 1-2	C	T	-	10588	1	0.00944465
451	2	47633041	Intron 1-2	G	A	rs958412300	10588	1	0.00944465
452	2	47633042	Intron 1-2	T	C	-	10588	2.5	0.0236116
453	2	47633045	Intron 1-2	T	G	rs137997368	13245	20	0.151
454	2	47633052	Intron 1-2	G	A	rs1024455140	13245	3.5	0.0264251
455	2	47633058	Intron 1-2	AA	-	-	10588	1	0.00944465
456	2	47633061	Intron 1-2	G	T	-	10588	1	0.00944465
457	2	47633065	Intron 1-2	T	C	-	10588	1.5	0.014167
458	2	47633089	Intron 1-2	C	G	-	10588	1	0.00944465
459	2	47633091	Intron 1-2	C	T	-	13245	5	0.0377501
460	2	47633099	Intron 1-2	CTCT	-	-	10588	3.5	0.0330563
461	2	47633106	Intron 1-2	-	T	-	13245	13.5	0.101925
462	2	47633118	Intron 1-2	C	T	-	10588	1	0.00944465
463	2	47633120	Intron 1-2	C	T	rs149464683	13245	12.5	0.0943752
464	2	47633125	Intron 1-2	C	A	-	10588	1	0.00944465
465	2	47633133	Intron 1-2	A	T	-	10588	1	0.00944465
466	2	47633146	Intron 1-2	C	T	-	10588	1	0.00944465
467	2	47633158	Intron 1-2	C	G	rs533624833	10588	13	0.122781
468	2	47633173	Intron 1-2	CCT	-	-	10588	1	0.00944465
469	2	47633188	Intron 1-2	T	C	-	10588	1	0.00944465
470	2	47633189	Intron 1-2	G	A	-	10588	1.5	0.014167
471	2	47633193	Intron 1-2	C	A	-	10588	5	0.0472233
472	2	47633198	Intron 1-2	T	G	-	10588	1	0.00944465
473	2	47633207	Intron 1-2	A	G	-	10588	1	0.00944465
474	2	47633213	Intron 1-2	C	G	-	10588	1	0.00944465
475	2	47633216	Intron 1-2	C	A	-	10588	1	0.00944465
476	2	47633217	Intron 1-2	G	A	rs540002971	10588	1	0.00944465
477	2	47633239	Intron 1-2	C	G	rs1038016198	13245	2	0.0151
478	2	47633250	Intron 1-2	T	-	-	13245	7	0.0528501
479	2	47633258	Intron 1-2	-	T	-	2657	1	0.0376364
480	2	47633271	Intron 1-2	A	G	-	10588	1	0.00944465
481	2	47633272	Intron 1-2	AG	-	-	10588	2.5	0.0236116
482	2	47633274	Intron 1-2	G	A	rs951650469	2657	1	0.0376364
483	2	47633291	Intron 1-2	AGGCTGG	-	-	10588	1	0.00944465
484	2	47633311	Intron 1-2	C	T	rs941333079	10588	1.5	0.014167
485	2	47633312	Intron 1-2	G	A	rs975535299	10588	1	0.00944465
486	2	47633317	Intron 1-2	C	T	rs921314131	13245	2.5	0.018875
487	2	47633320	Intron 1-2	C	A	-	13245	2	0.0151
488	2	47633328	Intron 1-2	A	G	rs1050923475	13245	6	0.0453001
489	2	47633331	Intron 1-2	C	G	rs892291330	10588	1	0.00944465
490	2	47633334	Intron 1-2	C	T	-	10588	1.5	0.014167
491	2	47633335	Intron 1-2	G	A	-	13335	3.5	0.0262467
492	2	47633337	Intron 1-2	C	T	-	10588	1	0.00944465
493	2	47633351	Intron 1-2	C	T	-	13245	2.5	0.018875
494	2	47633352	Intron 1-2	G	T	-	10588	1	0.00944465
495	2	47633352	Intron 1-2	G	A	rs543809948	10588	1	0.00944465
496	2	47633363	Intron 1-2	C	G	-	10588	1	0.00944465
497	2	47633374	Intron 1-2	A	G	rs951505727	2657	1	0.0376364
498	2	47633388	Intron 1-2	A	G	rs1038277251	10588	1	0.00944465
499	2	47633392	Intron 1-2	G	A	-	10588	1	0.00944465
500	2	47633397	Intron 1-2	C	T	rs182970662	10588	1	0.00944465
501	2	47633404	Intron 1-2	A	G	-	10588	1	0.00944465
502	2	47633437	Intron 1-2	C	T	rs191205136	2657	1	0.0376364
503	2	47633438	Intron 1-2	G	T	-	10588	1	0.00944465
504	2	47633438	Intron 1-2	G	A	rs368682565	10588	1	0.00944465
505	2	47633441	Intron 1-2	G	A	-	10588	4	0.0377786
506	2	47633457	Intron 1-2	C	G	-	2657	1	0.0376364
507	2	47633488	Intron 1-2	C	T	-	10588	2.5	0.0236116
508	2	47633493	Intron 1-2	C	T	rs146138080	10588	1	0.00944465
509	2	47633494	Intron 1-2	G	A	-	2657	1	0.0376364
510	2	47633495	Intron 1-2	C	A	-	10588	1	0.00944465
511	2	47633499	Intron 1-2	C	T	rs766043497	10588	1	0.00944465
512	2	47633500	Intron 1-2	G	A	rs571818299	10588	1	0.00944465
513	2	47633512	Intron 1-2	G	A	-	13245	2	0.0151
514	2	47633512	Intron 1-2	G	T	-	10588	1	0.00944465
515	2	47633517	Intron 1-2	G	A	-	10588	2.5	0.0236116
516	2	47633527	Intron 1-2	C	G	rs753503141	13245	2	0.0151
517	2	47633554	Intron 1-2	G	A	rs547807105	10588	3	0.028334
518	2	47633575	Intron 1-2	A	G	-	10588	1	0.00944465
519	2	47633593	Intron 1-2	G	-	-	13245	6.5	0.0490751
520	2	47633610	Intron 1-2	G	C	-	2657	2	0.0752729
521	2	47633613	Intron 1-2	A	G	-	10588	3	0.028334
522	2	47633617	Intron 1-2	G	A	rs1045774216	10588	1	0.00944465
523	2	47633670	Intron 1-2	T	C	-	10588	1	0.00944465
524	2	47633682	Intron 1-2	A	C	-	10588	1	0.00944465
525	2	47633717	Intron 1-2	C	T	rs6544986	13945	5055.5	36.2531
526	2	47633718	Intron 1-2	C	G	-	10588	1	0.00944465
527	2	47633748	Intron 1-2	A	G	-	10588	1	0.00944465
528	2	47633763	Intron 1-2	T	C	-	10588	1	0.00944465
529	2	47633783	Intron 1-2	C	T	rs950731564	10588	1	0.00944465
530	2	47633791	Intron 1-2	C	G	-	13245	4	0.0302001
531	2	47633798	Intron 1-2	G	A	-	10588	3.5	0.0330563
532	2	47633838	Intron 1-2	C	A	-	10588	1	0.00944465
533	2	47633853	Intron 1-2	T	A	-	10588	1	0.00944465
534	2	47633875	Intron 1-2	C	T	-	10588	1	0.00944465
535	2	47633879	Intron 1-2	G	A	-	10588	1	0.00944465
536	2	47633925	Intron 1-2	G	A	-	10588	1	0.00944465
537	2	47633938	Intron 1-2	G	C	-	13245	11	0.0830502
538	2	47633953	Intron 1-2	C	G	-	10588	1	0.00944465
539	2	47633959	Intron 1-2	A	G	-	10588	1	0.00944465
540	2	47633970	Intron 1-2	G	C	-	10588	1	0.00944465
541	2	47634011	Intron 1-2	C	T	-	10588	1	0.00944465
542	2	47634026	Intron 1-2	G	C	rs369111803	10588	8.5	0.0802796
543	2	47634035	Intron 1-2	C	T	-	10588	1	0.00944465
544	2	47634039	Intron 1-2	C	T	-	10588	1	0.00944465
545	2	47634065	Intron 1-2	C	G	-	10588	1.5	0.014167
546	2	47634066	Intron 1-2	C	T	rs1049976490	13245	2	0.0151
547	2	47634067	Intron 1-2	G	A	rs566995893	10588	2.5	0.0236116
548	2	47634074	Intron 1-2	G	C	rs76413452	14542	2046	14.0696
549	2	47634079	Intron 1-2	G	C	-	10588	1	0.00944465
550	2	47634088	Intron 1-2	G	A	-	10588	1	0.00944465
551	2	47634107	Intron 1-2	A	G	-	10588	1	0.00944465
552	2	47634115	Intron 1-2	T	C	-	10588	1	0.00944465
553	2	47634124	Intron 1-2	C	A	-	10588	1	0.00944465
554	2	47634135	Intron 1-2	C	T	-	13245	23	0.17365
555	2	47634136	Intron 1-2	C	G	-	10588	1.5	0.014167
556	2	47634158	Intron 1-2	T	A	-	10588	1	0.00944465
557	2	47634177	Intron 1-2	C	A	-	10588	1	0.00944465
558	2	47634193	Intron 1-2	C	T	-	10588	2	0.0188893
559	2	47634202	Intron 1-2	A	T	-	10588	1	0.00944465
560	2	47634211	Intron 1-2	G	T	-	10588	4	0.0377786
561	2	47634225	Intron 1-2	A	G	-	10588	1	0.00944465
562	2	47634243	Intron 1-2	C	T	rs947115103	10588	1	0.00944465
563	2	47634271	Intron 1-2	A	G	-	10588	1	0.00944465
564	2	47634274	Intron 1-2	G	A	-	13245	3	0.0226501
565	2	47634281	Intron 1-2	T	C	-	10588	1	0.00944465
566	2	47634284	Intron 1-2	C	T	-	10588	1	0.00944465
567	2	47634302	Intron 1-2	C	T	-	10588	1	0.00944465
568	2	47634307	Intron 1-2	G	T	-	610	1	0.163934
569	2	47634308	Intron 1-2	T	C	-	10588	1	0.00944465
570	2	47634310	Intron 1-2	G	C	-	10588	1	0.00944465
571	2	47634324	Intron 1-2	-	C	-	2657	1	0.0376364
572	2	47634343	Intron 1-2	G	T	-	10588	1	0.00944465
573	2	47634359	Intron 1-2	G	A	-	2657	2	0.0752729
574	2	47634367	Intron 1-2	C	T	-	13245	14	0.1057
575	2	47634380	Intron 1-2	C	A	-	2657	1	0.0376364
576	2	47634389	Intron 1-2	T	C	-	10588	1.5	0.014167
577	2	47634423	Intron 1-2	G	T	rs770601132	10588	10.5	0.0991689
578	2	47634449	Intron 1-2	A	G	-	10588	1	0.00944465
579	2	47634465	Intron 1-2	G	A	rs149994614	10588	1	0.00944465
580	2	47634465	Intron 1-2	G	C	-	10588	1	0.00944465
581	2	47634468	Intron 1-2	T	C	-	2657	1	0.0376364
582	2	47634507	Intron 1-2	T	C	-	13245	2	0.0151
583	2	47634540	Intron 1-2	G	A	-	10588	1	0.00944465
584	2	47634557	Intron 1-2	CC	-	-	10586	2	0.0188929
585	2	47634559	Intron 1-2	C	A	-	10586	8.5	0.0802947
586	2	47634562	Intron 1-2	C	A	rs191088361	13245	8	0.0604002
587	2	47634563	Intron 1-2	C	A	rs6544987	14542	10964.5	75.3988
588	2	47634564	Intron 1-2	C	T	rs924175196	2657	1	0.0376364
589	2	47634576	Intron 1-2	A	G	-	10588	1	0.00944465
590	2	47634592	Intron 1-2	G	C	-	2657	2	0.0752729
591	2	47634595	Intron 1-2	G	C	rs548499911	10588	2.5	0.0236116
592	2	47634597	Intron 1-2	G	A	rs117318041	13335	290.5	2.17848
593	2	47634609	Intron 1-2	G	A	-	10588	1	0.00944465
594	2	47634622	Intron 1-2	C	G	-	10588	1	0.00944465
595	2	47634625	Intron 1-2	G	A	rs759095354	10588	7.5	0.0708349
596	2	47634645	Intron 1-2	A	G	-	10588	1	0.00944465
597	2	47634652	Intron 1-2	G	C	-	10588	6	0.0566679
598	2	47634681	Intron 1-2	G	T	-	10588	1	0.00944465
599	2	47634690	Intron 1-2	C	T	rs145200814	10678	5.5	0.0515078
600	2	47634691	Intron 1-2	G	A	rs1004686015	10588	1	0.00944465
601	2	47634693	Intron 1-2	C	T	-	10588	1	0.00944465
602	2	47634699	Intron 1-2	A	G	rs62139710	13245	18	0.1359
603	2	47634712	Intron 1-2	G	A	-	10588	1	0.00944465
604	2	47634717	Intron 1-2	T	G	-	10588	1	0.00944465
605	2	47634717	Intron 1-2	T	C	-	10588	1	0.00944465
606	2	47634739	Intron 1-2	AG	-	-	10588	1	0.00944465
607	2	47634758	Intron 1-2	G	C	-	10588	1	0.00944465
608	2	47634779	Intron 1-2	G	A	rs906629026	10588	1	0.00944465
609	2	47634780	Intron 1-2	C	A	-	10588	1	0.00944465
610	2	47634782	Intron 1-2	T	C	-	10588	1	0.00944465
611	2	47634784	Intron 1-2	C	T	rs184769179	13245	17	0.12835
612	2	47634785	Intron 1-2	G	A	-	10588	1	0.00944465
613	2	47634847	Intron 1-2	G	A	-	13245	5	0.0377501
614	2	47634849	Intron 1-2	C	T	-	2657	2	0.0752729
615	2	47634853	Intron 1-2	C	T	-	10588	1	0.00944465
616	2	47634870	Intron 1-2	A	T	-	10588	1	0.00944465
617	2	47634875	Intron 1-2	G	A	-	10588	1	0.00944465
618	2	47634884	Intron 1-2	C	T	-	10588	1	0.00944465
619	2	47634886	Intron 1-2	C	G	rs190240306	13245	4	0.0302001
620	2	47634919	Intron 1-2	G	A	-	10588	1	0.00944465
621	2	47634936	Intron 1-2	C	T	rs182112576	13245	10.5	0.0792752
622	2	47634936	Intron 1-2	C	G	-	10588	1	0.00944465
623	2	47634964	Intron 1-2	C	T	-	10588	1	0.00944465
624	2	47634968	Intron 1-2	C	G	-	10588	1	0.00944465
625	2	47634975	Intron 1-2	T	C	-	10588	1	0.00944465
626	2	47634992	Intron 1-2	T	C	-	10588	1	0.00944465
627	2	47635002	Intron 1-2	G	A	rs542108756	10678	2	0.0187301
628	2	47635033	Intron 1-2	C	G	-	10588	1	0.00944465
629	2	47635081	Intron 1-2	T	C	rs571293199	13245	40	0.302001
630	2	47635081	Intron 1-2	T	A	-	10588	1	0.00944465
631	2	47635109	Intron 1-2	T	C	-	10588	1	0.00944465
632	2	47635117	Intron 1-2	T	C	-	10588	1	0.00944465
633	2	47635120	Intron 1-2	G	T	-	13245	18.5	0.139675
634	2	47635125	Intron 1-2	G	T	-	13245	9	0.0679502
635	2	47635135	Intron 1-2	A	G	rs2162123	14542	10989	75.5673
636	2	47635136	Intron 1-2	T	G	rs2162122	14542	10989.5	75.5708
637	2	47635165	Intron 1-2	C	A	-	10588	1	0.00944465
638	2	47635195	Intron 1-2	A	G	-	10588	2	0.0188893
639	2	47635200	Intron 1-2	G	C	-	10588	1	0.00944465
640	2	47635205	Intron 1-2	G	T	-	10588	1	0.00944465
641	2	47635243	Intron 1-2	T	C	-	10588	1	0.00944465
642	2	47635262	Intron 1-2	A	C	rs902827656	2657	1	0.0376364
643	2	47635262	Intron 1-2	A	G	rs902827656	10588	1	0.00944465
644	2	47635298	Intron 1-2	A	C	-	2657	1	0.0376364
645	2	47635299	Intron 1-2	C	T	-	10588	1	0.00944465
646	2	47635300	Intron 1-2	G	A	rs555042516	13335	120	0.899888
647	2	47635324	Intron 1-2	T	A	-	10588	1	0.00944465
648	2	47635336	Intron 1-2	G	T	-	10588	1	0.00944465
649	2	47635338	Intron 1-2	C	T	-	10588	1	0.00944465
650	2	47635339	Intron 1-2	A	G	-	10588	1	0.00944465
651	2	47635356	Intron 1-2	C	A	-	10588	1.5	0.014167
652	2	47635397	Intron 1-2	C	T	-	10588	1	0.00944465
653	2	47635401	Intron 1-2	C	T	-	10588	1	0.00944465
654	2	47635408	Intron 1-2	A	G	-	10588	1	0.00944465
655	2	47635425	Intron 1-2	G	A	rs546502427	13945	101.5	0.727859
656	2	47635436	Intron 1-2	T	C	-	10588	1	0.00944465
657	2	47635445	Intron 1-2	T	G	-	10588	1	0.00944465
658	2	47635446	Intron 1-2	C	T	rs775961106	13245	3	0.0226501
659	2	47635446	Intron 1-2	C	G	rs775961106	10588	1.5	0.014167
660	2	47635447	Intron 1-2	G	A	rs998892290	18157	218	1.20064
661	2	47635447	Intron 1-2	G	T	-	17547	13	0.0740867
662	2	47635466	Intron 1-2	G	C	-	13245	2	0.0151
663	2	47635473	Intron 1-2	G	C	rs547510385	10588	1	0.00944465
664	2	47635475	Intron 1-2	C	G	-	13245	2	0.0151
665	2	47635478	Intron 1-2	G	T	-	10588	1	0.00944465
666	2	47635482	Intron 1-2	A	G	-	4302	2	0.04649
667	2	47635485	Intron 1-2	C	T	-	4302	1	0.023245
668	2	47635508	Intron 1-2	C	G	rs559491216	10588	1	0.00944465
669	2	47635523	Intron 1-2	T	-	-	2657	41	1.54309
670	2	47635523	Intron 1-2	-	T	rs757515274	4912	4	0.0814332
671	2	47635523	Intron 1-2	CTT	-	-	4302	1	0.023245
672	2	47635524	Intron 1-2	T	-	rs786201069	4912	5708	116.205
673	2	47635601	Intron 2-3	TCT	-	rs267607919	610	1	0.163934
674	2	47635701	Intron 2-3	A	G	-	10588	1.5	0.014167
675	2	47635712	Intron 2-3	T	A	-	10588	1	0.00944465
676	2	47635712	Intron 2-3	T	C	rs775359941	10588	1	0.00944465
677	2	47635718	Intron 2-3	A	G	rs200890440	18247	9.5	0.0520634
678	2	47635721	Intron 2-3	A	-	-	10588	2.5	0.0236116
679	2	47635722	Intron 2-3	A	-	rs749398829	4302	2	0.04649
680	2	47635737	Intron 2-3	G	T	rs185555345	4302	1	0.023245
681	2	47635739	Intron 2-3	AAAT	-	-	10588	1	0.00944465
682	2	47635744	Intron 2-3	A	G	rs189858868	4302	2	0.04649
683	2	47635762	Intron 2-3	A	G	-	7569	10	0.132118
684	2	47635782	Intron 2-3	G	A	rs864622763	14890	4.5	0.0302216
685	2	47635791	Intron 2-3	G	A	-	10588	1	0.00944465
686	2	47635802	Intron 2-3	G	A	-	10588	1.5	0.014167
687	2	47635819	Intron 2-3	T	G	-	10588	1	0.00944465
688	2	47635824	Intron 2-3	T	-	-	10588	1.5	0.014167
689	2	47635831	Intron 2-3	T	C	-	10588	1	0.00944465
690	2	47635863	Intron 2-3	C	T	rs543305011	2657	1	0.0376364
691	2	47635864	Intron 2-3	G	A	rs750445846	10588	1	0.00944465
692	2	47635873	Intron 2-3	C	T	-	10588	1	0.00944465
693	2	47635885	Intron 2-3	C	T	rs1040299089	2657	1	0.0376364
694	2	47635911	Intron 2-3	G	A	-	10588	1	0.00944465
695	2	47635926	Intron 2-3	C	T	rs372475086	13245	30.5	0.230276
696	2	47635952	Intron 2-3	A	C	-	10588	1.5	0.014167
697	2	47635954	Intron 2-3	G	A	-	10588	1	0.00944465
698	2	47635963	Intron 2-3	C	T	-	10588	1.5	0.014167
699	2	47635980	Intron 2-3	A	C	-	10588	11	0.103891
700	2	47635981	Intron 2-3	T	C	rs118160472	13335	40.5	0.303712
701	2	47635988	Intron 2-3	A	G	-	10588	5.5	0.0519456
702	2	47635992	Intron 2-3	A	T	rs962649568	13245	4.5	0.0339751
703	2	47636011	Intron 2-3	A	G	rs1028100207	10588	1	0.00944465
704	2	47636025	Intron 2-3	G	A	-	610	1	0.163934
705	2	47636044	Intron 2-3	A	T	-	10588	1	0.00944465
706	2	47636053	Intron 2-3	T	C	-	10588	1	0.00944465
707	2	47636064	Intron 2-3	C	G	rs200677054	13245	97.5	0.736127
708	2	47636083	Intron 2-3	G	T	rs183840966	13945	713.5	5.11653
709	2	47636120	Intron 2-3	T	C	-	10588	1	0.00944465
710	2	47636146	Intron 2-3	A	G	-	610	1	0.163934
711	2	47636152	Intron 2-3	G	A	-	10588	1	0.00944465
712	2	47636163	Intron 2-3	G	C	-	10588	1	0.00944465
713	2	47636187	Intron 2-3	A	G	-	13245	2	0.0151
714	2	47636229	Intron 2-3	C	T	-	2657	1	0.0376364
715	2	47636232	Intron 2-3	G	A	-	610	1	0.163934
716	2	47636248	Intron 2-3	G	A	rs535537244	3267	7	0.214264
717	2	47636260	Intron 2-3	C	A	-	2657	2	0.0752729
718	2	47636260	Intron 2-3	C	T	-	2657	3	0.112909
719	2	47636298	Intron 2-3	G	C	-	10588	1	0.00944465
720	2	47636304	Intron 2-3	T	A	-	10588	1	0.00944465
721	2	47636310	Intron 2-3	T	A	rs141370382	13945	123	0.882037
722	2	47636337	Intron 2-3	C	T	rs914451468	10678	3.5	0.0327777
723	2	47636338	Intron 2-3	G	A	rs948373030	13245	5.5	0.0415251
724	2	47636348	Intron 2-3	T	A	-	10588	1	0.00944465
725	2	47636375	Intron 2-3	C	T	-	10588	1	0.00944465
726	2	47636400	Intron 2-3	C	A	-	10588	1	0.00944465
727	2	47636405	Intron 2-3	G	A	-	2657	2	0.0752729
728	2	47636406	Intron 2-3	A	G	-	10588	1	0.00944465
729	2	47636419	Intron 2-3	C	T	rs888063571	10588	1.5	0.014167
730	2	47636420	Intron 2-3	G	A	rs1007762926	10588	2	0.0188893
731	2	47636438	Intron 2-3	A	G	-	10588	1	0.00944465
732	2	47636448	Intron 2-3	A	T	-	10588	1	0.00944465
733	2	47636473	Intron 2-3	A	C	rs1031730526	10588	1	0.00944465
734	2	47636480	Intron 2-3	-	GCAT	rs199850998	10583	1048	9.90267
735	2	47636481	Intron 2-3	-	CATT	-	12621	22.5	0.178274
736	2	47636482	Intron 2-3	-	ATTTATTT	-	2657	24	0.903274
737	2	47636482	Intron 2-3	ATTTATTT	-	-	2657	9	0.338728
738	2	47636482	Intron 2-3	-	ATGCATTT	-	597	2	0.335008
739	2	47636483	Intron 2-3	TTTATT	-	-	10349	1	0.00966277
740	2	47636485	Intron 2-3	T	G	rs80121176	700	2	0.285714
741	2	47636486	Intron 2-3	T	C	rs77836197	700	2	0.285714
742	2	47636516	Intron 2-3	TTATTTA	-	-	2657	6	0.225819
743	2	47636528	Intron 2-3	C	G	-	10588	1	0.00944465
744	2	47636543	Intron 2-3	G	A	-	10588	1	0.00944465
745	2	47636551	Intron 2-3	G	A	-	10588	1	0.00944465
746	2	47636563	Intron 2-3	C	T	rs182535728	2657	1	0.0376364
747	2	47636594	Intron 2-3	C	T	-	13245	2.5	0.018875
748	2	47636613	Intron 2-3	C	T	-	10588	3.5	0.0330563
749	2	47636614	Intron 2-3	C	T	rs997486331	13245	9.5	0.0717252
750	2	47636615	Intron 2-3	G	A	rs146978260	2657	3	0.112909
751	2	47636619	Intron 2-3	C	T	rs891910933	10588	1	0.00944465
752	2	47636622	Intron 2-3	C	T	rs374642144	13335	213.5	1.60105
753	2	47636627	Intron 2-3	C	T	-	13245	3	0.0226501
754	2	47636630	Intron 2-3	G	A	rs376065452	13245	7	0.0528501
755	2	47636661	Intron 2-3	C	A	-	13245	3.5	0.0264251
756	2	47636663	Intron 2-3	C	G	-	10588	1	0.00944465
757	2	47636692	Intron 2-3	G	C	-	10588	2	0.0188893
758	2	47636701	Intron 2-3	C	T	-	10588	1	0.00944465
759	2	47636704	Intron 2-3	T	C	-	10588	1	0.00944465
760	2	47636710	Intron 2-3	C	T	rs574319749	10588	1	0.00944465
761	2	47636717	Intron 2-3	G	A	-	2657	1	0.0376364
762	2	47636723	Intron 2-3	G	A	-	10588	1	0.00944465
763	2	47636726	Intron 2-3	C	T	-	10588	1	0.00944465
764	2	47636729	Intron 2-3	C	T	-	610	1	0.163934
765	2	47636733	Intron 2-3	C	T	-	10588	1	0.00944465
766	2	47636736	Intron 2-3	C	T	-	13245	2.5	0.018875
767	2	47636743	Intron 2-3	C	T	rs563445466	10588	1.5	0.014167
768	2	47636743	Intron 2-3	C	A	rs563445466	10588	1	0.00944465
769	2	47636744	Intron 2-3	G	A	-	10588	9	0.0850019
770	2	47636744	Intron 2-3	G	T	-	11198	2	0.0178603
771	2	47636747	Intron 2-3	T	C	-	610	1	0.163934
772	2	47636748	Intron 2-3	G	T	-	610	1	0.163934
773	2	47636754	Intron 2-3	G	A	-	10588	1	0.00944465
774	2	47636773	Intron 2-3	T	G	-	10588	1	0.00944465
775	2	47636780	Intron 2-3	C	T	-	13245	2	0.0151
776	2	47636781	Intron 2-3	G	A	-	10588	1	0.00944465
777	2	47636794	Intron 2-3	C	T	-	10588	1	0.00944465
778	2	47636794	Intron 2-3	C	G	-	10588	1	0.00944465
779	2	47636806	Intron 2-3	T	G	-	10588	1	0.00944465
780	2	47636851	Intron 2-3	A	G	-	10588	1.5	0.014167
781	2	47636851	Intron 2-3	A	C	-	10588	4	0.0377786
782	2	47636860	Intron 2-3	C	T	rs545793825	2657	1	0.0376364
783	2	47636887	Intron 2-3	C	T	rs546523355	13245	22.5	0.169875
784	2	47636906	Intron 2-3	T	A	rs1043140984	10588	1	0.00944465
785	2	47636906	Intron 2-3	T	G	-	10588	1	0.00944465
786	2	47636909	Intron 2-3	G	A	-	10588	1	0.00944465
787	2	47636915	Intron 2-3	A	G	-	10588	1	0.00944465
788	2	47636916	Intron 2-3	G	T	-	10588	1	0.00944465
789	2	47636925	Intron 2-3	A	G	-	610	1	0.163934
790	2	47636927	Intron 2-3	A	G	rs183572778	14542	2043.5	14.0524
791	2	47636937	Intron 2-3	C	G	-	10588	1	0.00944465
792	2	47636939	Intron 2-3	C	T	-	610	1	0.163934
793	2	47636940	Intron 2-3	A	C	-	610	1	0.163934
794	2	47636950	Intron 2-3	A	G	-	13245	2	0.0151
795	2	47636956	Intron 2-3	C	T	-	10588	1	0.00944465
796	2	47636967	Intron 2-3	C	T	-	2657	1	0.0376364
797	2	47636971	Intron 2-3	C	T	-	10588	1	0.00944465
798	2	47636983	Intron 2-3	C	T	rs952352902	10588	1	0.00944465
799	2	47637013	Intron 2-3	A	G	-	13245	12	0.0906002
800	2	47637015	Intron 2-3	G	C	-	10588	1	0.00944465
801	2	47637058	Intron 2-3	T	A	-	10588	1	0.00944465
802	2	47637062	Intron 2-3	G	T	rs539413235	10588	1	0.00944465
803	2	47637065	Intron 2-3	C	T	rs17217758	13245	43.5	0.328426
804	2	47637069	Intron 2-3	C	G	rs566903650	13335	5.5	0.0412448
805	2	47637069	Intron 2-3	C	T	rs566903650	13245	9.5	0.0717252
806	2	47637075	Intron 2-3	C	T	-	2657	1	0.0376364
807	2	47637084	Intron 2-3	C	G	-	10588	1	0.00944465
808	2	47637086	Intron 2-3	G	A	-	10588	1	0.00944465
809	2	47637094	Intron 2-3	G	C	rs368513788	13245	7	0.0528501
810	2	47637110	Intron 2-3	C	G	rs1024856785	13245	20	0.151
811	2	47637111	Intron 2-3	A	C	rs534481891	10588	1	0.00944465
812	2	47637116	Intron 2-3	AAG	-	-	10588	1	0.00944465
813	2	47637126	Intron 2-3	C	G	-	10588	1	0.00944465
814	2	47637141	Intron 2-3	G	A	-	10588	1	0.00944465
815	2	47637147	Intron 2-3	A	C	rs17217765	14542	2128.5	14.6369
816	2	47637148	Intron 2-3	G	A	-	10588	1	0.00944465
817	2	47637154	Intron 2-3	G	C	-	10588	1	0.00944465
818	2	47637156	Intron 2-3	-	T	-	10588	1	0.00944465
819	2	47637163	Intron 2-3	C	G	-	610	1	0.163934
820	2	47637173	Intron 2-3	A	G	-	17547	8	0.0455918
821	2	47637177	Intron 2-3	A	T	-	2657	1	0.0376364
822	2	47637182	Intron 2-3	T	G	-	10588	1	0.00944465
823	2	47637188	Intron 2-3	A	G	-	4302	2	0.04649
824	2	47637205	Intron 2-3	A	G	rs748645813	2657	1	0.0376364
825	2	47637215	Intron 2-3	A	C	-	10588	1	0.00944465
826	2	47637516	Intron 3-4	-	AGGAGGAATT	-	10588	1	0.00944465
827	2	47637517	Intron 3-4	C	T	-	4302	1	0.023245
828	2	47637519	Intron 3-4	A	G	rs140217708	11198	3.5	0.0312556
829	2	47637519	Intron 3-4	A	C	-	10588	1	0.00944465
830	2	47637546	Intron 3-4	C	G	-	10588	1	0.00944465
831	2	47637560	Intron 3-4	G	C	-	10588	1	0.00944465
832	2	47637579	Intron 3-4	A	G	-	17547	24.5	0.139625
833	2	47637603	Intron 3-4	-	A	-	17547	7	0.0398929
834	2	47637604	Intron 3-4	A	T	rs550764057	10587	1	0.00944555
835	2	47637605	Intron 3-4	A	G	-	10588	1.5	0.014167
836	2	47637610	Intron 3-4	CT	-	-	2657	1	0.0376364
837	2	47637613	Intron 3-4	T	-	-	10588	1	0.00944465
838	2	47637614	Intron 3-4	T	-	rs958741752	4302	2	0.04649
839	2	47637631	Intron 3-4	A	-	-	10588	1	0.00944465
840	2	47637635	Intron 3-4	A	G	rs201331654	18157	114	0.627857
841	2	47637654	Intron 3-4	A	C	-	10588	1	0.00944465
842	2	47637656	Intron 3-4	A	G	-	10588	1	0.00944465
843	2	47637667	Intron 3-4	A	G	rs551621207	17547	45.5	0.259304
844	2	47637690	Intron 3-4	C	G	-	2657	1	0.0376364
845	2	47637699	Intron 3-4	G	A	-	2657	2	0.0752729
846	2	47637707	Intron 3-4	T	G	-	13245	2.5	0.018875
847	2	47637736	Intron 3-4	T	-	-	2657	1	0.0376364
848	2	47637738	Intron 3-4	T	C	-	10588	1	0.00944465
849	2	47637740	Intron 3-4	CTTT	-	-	10588	2.5	0.0236116
850	2	47637767	Intron 3-4	ATT	-	-	13245	7	0.0528501
851	2	47637768	Intron 3-4	A	G	-	13245	8	0.0604002
852	2	47637776	Intron 3-4	G	A	rs1034561362	10588	1	0.00944465
853	2	47637824	Intron 3-4	T	C	rs977512822	2657	1	0.0376364
854	2	47637843	Intron 3-4	G	A	-	10588	1	0.00944465
855	2	47637848	Intron 3-4	G	C	-	10588	1	0.00944465
856	2	47637863	Intron 3-4	A	G	rs74891667	10588	2	0.0188893
857	2	47637872	Intron 3-4	T	A	-	10588	1	0.00944465
858	2	47637889	Intron 3-4	A	G	-	13245	5.5	0.0415251
859	2	47637896	Intron 3-4	G	A	-	2657	1	0.0376364
860	2	47637903	Intron 3-4	T	A	rs557477715	2657	5	0.188182
861	2	47637936	Intron 3-4	C	T	-	10588	1	0.00944465
862	2	47637937	Intron 3-4	G	A	rs142173061	10588	88.5	0.835852
863	2	47637939	Intron 3-4	T	A	-	10588	1	0.00944465
864	2	47637941	Intron 3-4	T	C	-	13245	11.5	0.0868252
865	2	47637951	Intron 3-4	G	A	-	13245	4	0.0302001
866	2	47637955	Intron 3-4	G	C	-	13245	2	0.0151
867	2	47637956	Intron 3-4	A	G	-	10588	4.5	0.0425009
868	2	47637968	Intron 3-4	C	T	rs181447342	2657	1	0.0376364
869	2	47637969	Intron 3-4	G	A	-	13245	13	0.0981502
870	2	47637974	Intron 3-4	C	T	-	10588	1	0.00944465
871	2	47637975	Intron 3-4	G	A	rs1005737029	13245	3.5	0.0264251
872	2	47637976	Intron 3-4	G	T	-	13245	2.5	0.018875
873	2	47637977	Intron 3-4	C	G	-	10587	1	0.00944555
874	2	47637988	Intron 3-4	C	G	-	10588	1	0.00944465
875	2	47637991	Intron 3-4	T	A	-	13245	6.5	0.0490751
876	2	47637996	Intron 3-4	C	T	-	10588	1	0.00944465
877	2	47638007	Intron 3-4	G	A	-	2657	2	0.0752729
878	2	47638013	Intron 3-4	C	G	rs6715307	11288	6896.5	61.0959
879	2	47638022	Intron 3-4	C	T	-	10588	1	0.00944465
880	2	47638024	Intron 3-4	G	A	-	10588	1	0.00944465
881	2	47638028	Intron 3-4	C	T	-	10588	1	0.00944465
882	2	47638080	Intron 3-4	T	-	-	10588	1	0.00944465
883	2	47638085	Intron 3-4	-	A	-	10588	1	0.00944465
884	2	47638087	Intron 3-4	G	A	rs577312693	10588	1	0.00944465
885	2	47638108	Intron 3-4	C	G	-	10588	1	0.00944465
886	2	47638109	Intron 3-4	T	G	rs533023802	10588	5.5	0.0519456
887	2	47638113	Intron 3-4	C	A	rs538836605	13335	123	0.922385
888	2	47638123	Intron 3-4	C	G	rs55744704	13245	9	0.0679502
889	2	47638124	Intron 3-4	T	C	-	610	1	0.163934
890	2	47638144	Intron 3-4	T	G	-	10588	1	0.00944465
891	2	47638161	Intron 3-4	C	G	-	2657	1	0.0376364
892	2	47638166	Intron 3-4	A	G	-	10588	1	0.00944465
893	2	47638194	Intron 3-4	A	G	rs1038113328	610	1	0.163934
894	2	47638201	Intron 3-4	G	A	-	10588	1	0.00944465
895	2	47638217	Intron 3-4	T	C	-	10588	1	0.00944465
896	2	47638247	Intron 3-4	A	T	-	2657	3	0.112909
897	2	47638265	Intron 3-4	G	C	rs199994621	13245	88.5	0.668177
898	2	47638287	Intron 3-4	C	-	-	13245	544.5	4.11099
899	2	47638294	Intron 3-4	C	A	-	10588	1	0.00944465
900	2	47638297	Intron 3-4	G	T	rs10460538	13335	23	0.172478
901	2	47638307	Intron 3-4	G	A	rs145471385	13245	298	2.24991
902	2	47638309	Intron 3-4	G	A	rs62139712	13245	307.5	2.32163
903	2	47638314	Intron 3-4	C	A	-	10588	1	0.00944465
904	2	47638318	Intron 3-4	G	C	-	10588	1.5	0.014167
905	2	47638325	Intron 3-4	G	A	-	10588	1	0.00944465
906	2	47638326	Intron 3-4	C	G	-	10588	1	0.00944465
907	2	47638340	Intron 3-4	T	G	-	10588	1	0.00944465
908	2	47638362	Intron 3-4	C	T	-	10588	1.5	0.014167
909	2	47638386	Intron 3-4	C	T	-	13245	2	0.0151
910	2	47638397	Intron 3-4	C	T	-	10588	2	0.0188893
911	2	47638399	Intron 3-4	C	T	-	10588	1	0.00944465
912	2	47638419	Intron 3-4	G	A	rs573591872	13245	43.5	0.328426
913	2	47638424	Intron 3-4	T	C	-	10588	1	0.00944465
914	2	47638432	Intron 3-4	A	G	-	10588	1	0.00944465
915	2	47638437	Intron 3-4	G	T	-	10588	1	0.00944465
916	2	47638445	Intron 3-4	A	G	-	10588	1	0.00944465
917	2	47638457	Intron 3-4	C	G	-	13245	16	0.1208
918	2	47638459	Intron 3-4	G	C	-	2657	2	0.0752729
919	2	47638460	Intron 3-4	G	T	rs76878429	13335	28	0.209974
920	2	47638473	Intron 3-4	ACC	-	-	10588	1	0.00944465
921	2	47638490	Intron 3-4	C	A	-	10588	1	0.00944465
922	2	47638498	Intron 3-4	G	A	-	10588	1.5	0.014167
923	2	47638502	Intron 3-4	C	T	-	10588	1	0.00944465
924	2	47638512	Intron 3-4	T	G	-	13245	18.5	0.139675
925	2	47638525	Intron 3-4	A	G	-	10588	1	0.00944465
926	2	47638526	Intron 3-4	T	A	-	13245	2	0.0151
927	2	47638570	Intron 3-4	C	T	-	10588	1	0.00944465
928	2	47638580	Intron 3-4	C	T	-	10588	1	0.00944465
929	2	47638588	Intron 3-4	C	A	-	10588	3	0.028334
930	2	47638607	Intron 3-4	G	C	-	10588	1	0.00944465
931	2	47638607	Intron 3-4	G	T	-	10588	1	0.00944465
932	2	47638618	Intron 3-4	G	A	rs771457176	10588	1	0.00944465
933	2	47638627	Intron 3-4	T	A	-	10588	1	0.00944465
934	2	47638632	Intron 3-4	G	A	-	10588	1	0.00944465
935	2	47638644	Intron 3-4	T	G	-	10588	1	0.00944465
936	2	47638646	Intron 3-4	A	G	-	2657	1	0.0376364
937	2	47638658	Intron 3-4	G	A	rs962697863	13245	3	0.0226501
938	2	47638671	Intron 3-4	C	T	-	10588	1	0.00944465
939	2	47638686	Intron 3-4	C	G	rs555103721	13335	126	0.944882
940	2	47638693	Intron 3-4	-	TG	-	10588	1	0.00944465
941	2	47638702	Intron 3-4	A	G	rs535194398	2657	1	0.0376364
942	2	47638711	Intron 3-4	C	T	rs145265977	10588	1	0.00944465
943	2	47638715	Intron 3-4	C	T	rs145004508	13245	19	0.14345
944	2	47638773	Intron 3-4	-	T	-	10588	1	0.00944465
945	2	47638776	Intron 3-4	A	G	-	13335	5.5	0.0412448
946	2	47638785	Intron 3-4	C	T	-	610	1	0.163934
947	2	47638787	Intron 3-4	-	A	-	610	1	0.163934
948	2	47638788	Intron 3-4	G	T	-	10588	1	0.00944465
949	2	47638794	Intron 3-4	C	T	-	10588	1	0.00944465
950	2	47638795	Intron 3-4	A	G	rs10209586	14542	11049.5	75.9834
951	2	47638798	Intron 3-4	C	T	rs1016919712	2657	2	0.0752729
952	2	47638799	Intron 3-4	G	A	rs765359230	10588	2	0.0188893
953	2	47638801	Intron 3-4	C	G	-	10588	1	0.00944465
954	2	47638801	Intron 3-4	C	A	-	10588	1	0.00944465
955	2	47638858	Intron 3-4	T	C	-	10588	1	0.00944465
956	2	47638879	Intron 3-4	C	T	-	13245	3	0.0226501
957	2	47638879	Intron 3-4	C	A	-	10588	1.5	0.014167
958	2	47638888	Intron 3-4	T	A	-	13245	3	0.0226501
959	2	47638891	Intron 3-4	T	C	rs17224185	13335	163	1.22235
960	2	47638896	Intron 3-4	G	A	-	10588	1	0.00944465
961	2	47638900	Intron 3-4	T	C	-	10588	1.5	0.014167
962	2	47638902	Intron 3-4	A	C	-	10588	1	0.00944465
963	2	47638907	Intron 3-4	C	T	-	10588	1	0.00944465
964	2	47638908	Intron 3-4	C	T	-	10588	1	0.00944465
965	2	47638908	Intron 3-4	C	A	-	610	1	0.163934
966	2	47638915	Intron 3-4	A	T	-	10588	1.5	0.014167
967	2	47638917	Intron 3-4	C	T	rs949156718	10588	1	0.00944465
968	2	47638918	Intron 3-4	G	A	rs750264397	10588	1	0.00944465
969	2	47638933	Intron 3-4	T	A	-	10588	1	0.00944465
970	2	47638937	Intron 3-4	A	G	-	10588	1	0.00944465
971	2	47638963	Intron 3-4	C	T	-	2657	1	0.0376364
972	2	47638980	Intron 3-4	A	C	-	10588	1.5	0.014167
973	2	47638983	Intron 3-4	A	C	-	10588	1	0.00944465
974	2	47638992	Intron 3-4	G	A	rs151160237	13245	114.5	0.864477
975	2	47639008	Intron 3-4	G	T	-	10588	1.5	0.014167
976	2	47639013	Intron 3-4	C	T	rs537619244	10588	1	0.00944465
977	2	47639014	Intron 3-4	G	A	-	10588	1	0.00944465
978	2	47639018	Intron 3-4	G	A	rs1008710611	10588	1	0.00944465
979	2	47639019	Intron 3-4	C	T	rs1020828401	10588	1	0.00944465
980	2	47639046	Intron 3-4	T	-	-	10588	1	0.00944465
981	2	47639066	Intron 3-4	C	T	rs990541880	10588	4.5	0.0425009
982	2	47639077	Intron 3-4	A	G	-	2657	1	0.0376364
983	2	47639089	Intron 3-4	C	T	-	13245	2	0.0151
984	2	47639090	Intron 3-4	G	A	rs983577746	13245	4	0.0302001
985	2	47639102	Intron 3-4	T	C	-	10588	1	0.00944465
986	2	47639107	Intron 3-4	T	C	-	10588	1	0.00944465
987	2	47639118	Intron 3-4	C	G	-	10588	1	0.00944465
988	2	47639129	Intron 3-4	-	A	-	10588	1	0.00944465
989	2	47639178	Intron 3-4	T	C	-	10588	1	0.00944465
990	2	47639185	Intron 3-4	C	G	-	10588	1	0.00944465
991	2	47639190	Intron 3-4	T	G	-	10588	1	0.00944465
992	2	47639194	Intron 3-4	T	G	-	13245	2	0.0151
993	2	47639227	Intron 3-4	G	A	-	10588	3.5	0.0330563
994	2	47639243	Intron 3-4	A	G	-	10588	1	0.00944465
995	2	47639256	Intron 3-4	C	T	-	13245	3	0.0226501
996	2	47639257	Intron 3-4	G	C	-	13245	3	0.0226501
997	2	47639257	Intron 3-4	G	A	-	10588	1	0.00944465
998	2	47639270	Intron 3-4	C	G	rs1010026252	10588	1	0.00944465
999	2	47639270	Intron 3-4	C	T	-	10588	1	0.00944465
1000	2	47639280	Intron 3-4	C	T	rs1008323901	10588	1	0.00944465
1001	2	47639297	Intron 3-4	C	G	-	10588	1	0.00944465
1002	2	47639303	Intron 3-4	C	-	-	10588	1	0.00944465
1003	2	47639304	Intron 3-4	A	-	-	2657	1	0.0376364
1004	2	47639309	Intron 3-4	A	G	-	10588	1	0.00944465
1005	2	47639322	Intron 3-4	C	T	rs895089401	13245	2	0.0151
1006	2	47639329	Intron 3-4	A	G	rs17217786	13245	15.5	0.117025
1007	2	47639330	Intron 3-4	C	A	-	10588	1	0.00944465
1008	2	47639344	Intron 3-4	C	G	-	2657	1	0.0376364
1009	2	47639381	Intron 3-4	T	C	rs6737783	2657	1	0.0376364
1010	2	47639392	Intron 3-4	T	A	rs17217800	10588	1	0.00944465
1011	2	47639421	Intron 3-4	G	T	-	10588	10	0.0944465
1012	2	47639472	Intron 3-4	T	C	-	10588	1	0.00944465
1013	2	47639483	Intron 3-4	G	A	-	10588	1	0.00944465
1014	2	47639492	Intron 3-4	T	G	-	2657	1	0.0376364
1015	2	47639493	Intron 3-4	T	G	-	10588	1	0.00944465
1016	2	47639494	Intron 3-4	C	T	-	10588	1	0.00944465
1017	2	47639502	Intron 3-4	C	G	rs781033756	10588	1	0.00944465
1018	2	47639504	Intron 3-4	TTC	-	-	10588	1	0.00944465
1019	2	47639511	Intron 3-4	T	A	rs182754158	10588	1	0.00944465
1020	2	47639522	Intron 3-4	A	G	-	610	1	0.163934
1021	2	47639538	Intron 3-4	T	C	rs773520113	90	1	1.11111
1022	2	47639715	Intron 4-5	A	G	-	4302	2	0.04649
1023	2	47639756	Intron 4-5	A	G	-	6959	5	0.0718494
1024	2	47639760	Intron 4-5	A	T	rs187141606	7049	15	0.212796
1025	2	47639772	Intron 4-5	C	A	-	4302	2	0.04649
1026	2	47639774	Intron 4-5	A	G	-	4302	1	0.023245
1027	2	47639783	Intron 4-5	T	A	-	10588	1	0.00944465
1028	2	47639795	Intron 4-5	A	G	rs561010486	4302	1	0.023245
1029	2	47639797	Intron 4-5	T	A	-	10588	1	0.00944465
1030	2	47639804	Intron 4-5	A	G	-	13855	9	0.0649585
1031	2	47639807	Intron 4-5	T	C	-	10588	1	0.00944465
1032	2	47639825	Intron 4-5	TG	-	-	10588	1	0.00944465
1033	2	47639831	Intron 4-5	A	G	rs375885071	10588	1	0.00944465
1034	2	47639844	Intron 4-5	A	G	-	10588	1	0.00944465
1035	2	47639847	Intron 4-5	T	-	-	610	6	0.983607
1036	2	47639871	Intron 4-5	T	G	rs150470483	14542	1993.5	13.7086
1037	2	47639899	Intron 4-5	A	G	-	10588	1	0.00944465
1038	2	47639900	Intron 4-5	A	G	rs565994535	13245	6	0.0453001
1039	2	47639903	Intron 4-5	G	A	-	10588	1	0.00944465
1040	2	47639905	Intron 4-5	G	A	rs1019764122	10588	1	0.00944465
1041	2	47639906	Intron 4-5	C	T	rs190015915	10588	1	0.00944465
1042	2	47639926	Intron 4-5	C	T	-	10588	3	0.028334
1043	2	47639932	Intron 4-5	C	T	rs182360257	10588	1	0.00944465
1044	2	47639937	Intron 4-5	A	T	-	10588	1	0.00944465
1045	2	47639938	Intron 4-5	G	T	-	10588	5	0.0472233
1046	2	47639945	Intron 4-5	G	A	-	13245	2.5	0.018875
1047	2	47639964	Intron 4-5	C	G	-	10588	1.5	0.014167
1048	2	47639966	Intron 4-5	C	T	-	10588	1	0.00944465
1049	2	47639977	Intron 4-5	G	C	-	10588	1	0.00944465
1050	2	47639981	Intron 4-5	T	C	rs17224199	13245	14	0.1057
1051	2	47639997	Intron 4-5	C	G	-	2657	1	0.0376364
1052	2	47640045	Intron 4-5	C	T	-	10588	1	0.00944465
1053	2	47640047	Intron 4-5	A	G	rs888901374	10588	1.5	0.014167
1054	2	47640075	Intron 4-5	G	T	-	10588	1	0.00944465
1055	2	47640077	Intron 4-5	A	G	rs187573753	13932	146.5	1.05154
1056	2	47640086	Intron 4-5	G	T	rs560220773	10588	1	0.00944465
1057	2	47640092	Intron 4-5	C	T	-	10588	1.5	0.014167
1058	2	47640095	Intron 4-5	G	A	-	597	1	0.167504
1059	2	47640097	Intron 4-5	C	T	-	10588	1	0.00944465
1060	2	47640103	Intron 4-5	C	T	rs17224213	14542	1965	13.5126
1061	2	47640104	Intron 4-5	T	A	-	10588	1.5	0.014167
1062	2	47640175	Intron 4-5	ATATA	-	-	10588	1.5	0.014167
1063	2	47640185	Intron 4-5	A	G	-	10588	1	0.00944465
1064	2	47640195	Intron 4-5	CTT	-	-	13245	2	0.0151
1065	2	47640233	Intron 4-5	A	G	-	10588	3.5	0.0330563
1066	2	47640264	Intron 4-5	A	G	-	2657	1	0.0376364
1067	2	47640270	Intron 4-5	T	C	-	10588	1	0.00944465
1068	2	47640275	Intron 4-5	C	T	rs967626894	10588	1	0.00944465
1069	2	47640294	Intron 4-5	C	G	-	10588	2	0.0188893
1070	2	47640307	Intron 4-5	C	A	rs183910118	2657	61	2.29582
1071	2	47640307	Intron 4-5	T	-	-	2657	4	0.150546
1072	2	47640310	Intron 4-5	C	T	rs894087476	10588	1	0.00944465
1073	2	47640315	Intron 4-5	C	T	rs368722806	10588	1	0.00944465
1074	2	47640316	Intron 4-5	G	A	-	10588	1	0.00944465
1075	2	47640325	Intron 4-5	A	C	-	10588	1	0.00944465
1076	2	47640341	Intron 4-5	-	T	rs1036528546	10588	3.5	0.0330563
1077	2	47640341	Intron 4-5	T	-	-	10588	3	0.028334
1078	2	47640360	Intron 4-5	A	G	-	10588	1	0.00944465
1079	2	47640371	Intron 4-5	C	T	-	10588	1	0.00944465
1080	2	47640376	Intron 4-5	T	C	rs370313931	13335	85	0.63742
1081	2	47640379	Intron 4-5	C	T	-	10588	2	0.0188893
1082	2	47640380	Intron 4-5	G	A	-	13245	2	0.0151
1083	2	47640387	Intron 4-5	C	T	rs113531092	10588	1	0.00944465
1084	2	47640388	Intron 4-5	G	A	rs548984939	10588	1	0.00944465
1085	2	47640405	Intron 4-5	G	A	-	13245	5	0.0377501
1086	2	47640410	Intron 4-5	A	G	-	10588	1	0.00944465
1087	2	47640411	Intron 4-5	C	T	rs548503086	10588	1.5	0.014167
1088	2	47640415	Intron 4-5	C	G	-	10588	1	0.00944465
1089	2	47640455	Intron 4-5	G	A	rs17224227	10588	1	0.00944465
1090	2	47640467	Intron 4-5	G	T	-	10588	1	0.00944465
1091	2	47640479	Intron 4-5	T	C	-	10588	1	0.00944465
1092	2	47640491	Intron 4-5	A	G	-	10588	1	0.00944465
1093	2	47640504	Intron 4-5	A	G	rs143055227	10588	1	0.00944465
1094	2	47640510	Intron 4-5	G	C	-	10588	1	0.00944465
1095	2	47640529	Intron 4-5	C	G	rs574527645	13245	31.5	0.237826
1096	2	47640536	Intron 4-5	T	C	-	10588	3	0.028334
1097	2	47640549	Intron 4-5	C	T	rs374858514	2657	1	0.0376364
1098	2	47640553	Intron 4-5	C	T	-	10588	1	0.00944465
1099	2	47640571	Intron 4-5	T	A	-	10588	1	0.00944465
1100	2	47640599	Intron 4-5	C	T	rs147454344	10588	6.5	0.0613903
1101	2	47640607	Intron 4-5	A	T	-	10588	1	0.00944465
1102	2	47640630	Intron 4-5	G	C	-	10588	1	0.00944465
1103	2	47640654	Intron 4-5	T	C	-	10588	1	0.00944465
1104	2	47640656	Intron 4-5	A	G	-	10588	1	0.00944465
1105	2	47640670	Intron 4-5	T	A	-	10588	1	0.00944465
1106	2	47640687	Intron 4-5	TTTTTTTTT	-	-	2657	22	0.828002
1107	2	47640687	Intron 4-5	TTTTTTTTTTTT	-	-	2657	27	1.01618
1108	2	47640687	Intron 4-5	TTTTTTTTTTTTT	-	-	2657	70	2.63455
1109	2	47640687	Intron 4-5	TTTTTTTTTTTTTTTTTT	-	-	2657	43	1.61837
1110	2	47640688	Intron 4-5	T	G	rs13022496	2657	32	1.20437
1111	2	47640697	Intron 4-5	T	G	rs867748972	2657	1	0.0376364
1112	2	47640702	Intron 4-5	T	C	-	2657	3	0.112909
1113	2	47640704	Intron 4-5	T	C	-	2657	2	0.0752729
1114	2	47640732	Intron 4-5	C	T	rs564946148	10675	5.5	0.0515222
1115	2	47640745	Intron 4-5	C	T	-	2657	1	0.0376364
1116	2	47640752	Intron 4-5	G	C	-	10588	1	0.00944465
1117	2	47640762	Intron 4-5	G	C	-	10588	1	0.00944465
1118	2	47640765	Intron 4-5	C	T	rs17217828	13245	14.5	0.109475
1119	2	47640767	Intron 4-5	A	C	-	10588	1	0.00944465
1120	2	47640777	Intron 4-5	A	G	-	10588	1	0.00944465
1121	2	47640778	Intron 4-5	C	G	-	10588	1	0.00944465
1122	2	47640783	Intron 4-5	A	G	rs938197630	2657	1	0.0376364
1123	2	47640798	Intron 4-5	A	T	-	10588	1	0.00944465
1124	2	47640807	Intron 4-5	A	G	rs17217835	10588	1	0.00944465
1125	2	47640817	Intron 4-5	C	A	-	10588	1	0.00944465
1126	2	47640828	Intron 4-5	A	G	-	10588	1	0.00944465
1127	2	47640832	Intron 4-5	G	A	rs55646868	13335	10	0.0749906
1128	2	47640842	Intron 4-5	A	G	-	10588	1	0.00944465
1129	2	47640843	Intron 4-5	C	T	-	10588	1	0.00944465
1130	2	47640848	Intron 4-5	A	C	-	10588	1	0.00944465
1131	2	47640850	Intron 4-5	G	A	rs188793478	10588	1	0.00944465
1132	2	47640854	Intron 4-5	C	T	-	10588	1	0.00944465
1133	2	47640861	Intron 4-5	C	T	-	10588	1	0.00944465
1134	2	47640861	Intron 4-5	C	G	-	10588	1	0.00944465
1135	2	47640863	Intron 4-5	C	T	-	90	1	1.11111
1136	2	47640866	Intron 4-5	C	G	-	10588	1	0.00944465
1137	2	47640895	Intron 4-5	T	C	-	13245	2	0.0151
1138	2	47640906	Intron 4-5	A	C	-	10588	1	0.00944465
1139	2	47640949	Intron 4-5	C	-	-	10588	2.5	0.0236116
1140	2	47640953	Intron 4-5	A	C	-	10588	1	0.00944465
1141	2	47640954	Intron 4-5	C	T	-	2657	1	0.0376364
1142	2	47640971	Intron 4-5	A	G	rs17224234	13245	313.5	2.36693
1143	2	47640987	Intron 4-5	C	T	-	10588	1	0.00944465
1144	2	47640989	Intron 4-5	C	G	-	13245	13.5	0.101925
1145	2	47641006	Intron 4-5	C	G	rs553092541	90	1	1.11111
1146	2	47641015	Intron 4-5	G	T	-	610	1	0.163934
1147	2	47641022	Intron 4-5	T	C	-	10588	1	0.00944465
1148	2	47641028	Intron 4-5	A	G	-	10588	1	0.00944465
1149	2	47641031	Intron 4-5	C	T	rs948471599	10588	1	0.00944465
1150	2	47641032	Intron 4-5	G	A	-	10588	5.5	0.0519456
1151	2	47641032	Intron 4-5	G	T	-	10588	1	0.00944465
1152	2	47641043	Intron 4-5	A	G	rs3963351	13932	1980.5	14.2155
1153	2	47641045	Intron 4-5	G	A	-	10588	1	0.00944465
1154	2	47641051	Intron 4-5	-	A	-	13245	3	0.0226501
1155	2	47641058	Intron 4-5	G	T	rs557335855	10588	1	0.00944465
1156	2	47641059	Intron 4-5	T	C	-	10588	1	0.00944465
1157	2	47641076	Intron 4-5	C	T	-	13245	2	0.0151
1158	2	47641076	Intron 4-5	C	G	rs993493393	10588	1	0.00944465
1159	2	47641085	Intron 4-5	C	T	-	10588	1	0.00944465
1160	2	47641088	Intron 4-5	C	G	-	10588	1	0.00944465
1161	2	47641090	Intron 4-5	G	A	rs368304767	13245	5	0.0377501
1162	2	47641094	Intron 4-5	C	T	rs993701308	2657	1	0.0376364
1163	2	47641139	Intron 4-5	G	A	-	2657	2	0.0752729
1164	2	47641144	Intron 4-5	A	-	-	10588	1	0.00944465
1165	2	47641164	Intron 4-5	T	C	-	10588	1	0.00944465
1166	2	47641167	Intron 4-5	G	T	-	10588	1	0.00944465
1167	2	47641171	Intron 4-5	A	G	-	10588	1	0.00944465
1168	2	47641175	Intron 4-5	T	C	-	10588	1	0.00944465
1169	2	47641186	Intron 4-5	C	G	-	10588	5	0.0472233
1170	2	47641191	Intron 4-5	C	A	-	13245	3	0.0226501
1171	2	47641210	Intron 4-5	C	T	-	10588	1	0.00944465
1172	2	47641223	Intron 4-5	C	G	-	10588	1	0.00944465
1173	2	47641227	Intron 4-5	G	T	-	10588	1	0.00944465
1174	2	47641243	Intron 4-5	A	G	-	13245	10.5	0.0792752
1175	2	47641271	Intron 4-5	T	C	-	2657	1	0.0376364
1176	2	47641273	Intron 4-5	G	T	-	10588	1	0.00944465
1177	2	47641274	Intron 4-5	G	C	-	10588	1	0.00944465
1178	2	47641311	Intron 4-5	-	T	-	4302	2	0.04649
1179	2	47641335	Intron 4-5	A	T	-	610	1	0.163934
1180	2	47641339	Intron 4-5	G	T	rs559491462	4912	3	0.0610749
1181	2	47641343	Intron 4-5	T	A	-	610	1	0.163934
1182	2	47641344	Intron 4-5	-	G	-	4912	3	0.0610749
1183	2	47641347	Intron 4-5	A	C	rs943978922	4302	2	0.04649
1184	2	47641355	Intron 4-5	A	G	-	10588	1	0.00944465
1185	2	47641362	Intron 4-5	G	T	rs746416224	10588	1	0.00944465
1186	2	47641382	Intron 4-5	T	G	-	10588	1	0.00944465
1187	2	47641385	Intron 4-5	G	T	rs17224255	17547	19	0.108281
1188	2	47641385	Intron 4-5	G	A	rs17224255	4302	1	0.023245
1189	2	47641387	Intron 4-5	T	G	-	17547	4	0.0227959
1190	2	47641391	Intron 4-5	T	G	-	10588	1	0.00944465
1191	2	47641559	Intron 5-6	AAAAAAAAAAAA	-	-	2657	1	0.0376364
1192	2	47641560	Intron 5-6	AAA	-	rs752529320	4302	1539	35.7741
1193	2	47641560	Intron 5-6	AA	-	rs1057519254	4302	1635	38.0056
1194	2	47641560	Intron 5-6	AAAA	-	rs779102258	4912	52	1.05863
1195	2	47641560	Intron 5-6	A	-	rs1057519253	4302	17	0.395165
1196	2	47641560	Intron 5-6	AAAAAAAA	-	-	4912	3	0.0610749
1197	2	47641560	Intron 5-6	AAAAAAAAAAAAAAAAAAA	-	-	610	1	0.163934
1198	2	47641560	Intron 5-6	AAAAAA	-	rs747112683	610	1	0.163934
1199	2	47641560	Intron 5-6	AAAAA	-	rs768805063	610	1	0.163934
1200	2	47641561	Intron 5-6	A	-	-	4302	900	20.9205
1201	2	47641561	Intron 5-6	AA	-	-	4302	41	0.953045
1202	2	47641561	Intron 5-6	-	A	-	4302	4	0.09298
1203	2	47641562	Intron 5-6	A	-	-	4302	1470	34.1702
1204	2	47641562	Intron 5-6	AA	-	-	4302	39	0.906555
1205	2	47641563	Intron 5-6	A	-	-	4302	10	0.23245
1206	2	47641567	Intron 5-6	A	-	-	4302	2	0.04649
1207	2	47641585	Intron 5-6	A	G	-	4302	2	0.04649
1208	2	47641589	Intron 5-6	G	A	rs959779663	2657	1	0.0376364
1209	2	47641606	Intron 5-6	-	TTA	-	10588	1.5	0.014167
1210	2	47641622	Intron 5-6	A	G	-	10588	2	0.0188893
1211	2	47641630	Intron 5-6	A	T	rs546647753	13335	3	0.0224972
1212	2	47641631	Intron 5-6	T	G	-	14890	2	0.0134318
1213	2	47641641	Intron 5-6	G	C	-	10588	1	0.00944465
1214	2	47641666	Intron 5-6	G	C	-	10588	1	0.00944465
1215	2	47641675	Intron 5-6	T	A	-	610	1	0.163934
1216	2	47641680	Intron 5-6	C	T	-	10588	2	0.0188893
1217	2	47641690	Intron 5-6	A	G	rs909216770	10588	1	0.00944465
1218	2	47641697	Intron 5-6	G	C	-	10588	1	0.00944465
1219	2	47641698	Intron 5-6	TTTAAA	-	-	2657	27	1.01618
1220	2	47641699	Intron 5-6	TTT	-	-	4912	9	0.183225
1221	2	47641702	Intron 5-6	AAT	-	-	10588	59	0.557235
1222	2	47641703	Intron 5-6	AAT	-	-	4912	9	0.183225
1223	2	47641705	Intron 5-6	T	A	rs1039024870	2657	27	1.01618
1224	2	47641720	Intron 5-6	C	T	-	10588	1	0.00944465
1225	2	47641747	Intron 5-6	T	-	rs879472527	610	1	0.163934
1226	2	47641767	Intron 5-6	G	A	-	13245	3	0.0226501
1227	2	47641786	Intron 5-6	C	T	-	10588	1	0.00944465
1228	2	47641787	Intron 5-6	C	A	-	10588	1	0.00944465
1229	2	47641794	Intron 5-6	C	T	rs749374550	2657	1	0.0376364
1230	2	47641796	Intron 5-6	G	C	-	10588	1	0.00944465
1231	2	47641812	Intron 5-6	C	G	-	10588	1	0.00944465
1232	2	47641825	Intron 5-6	C	T	rs569189028	90	1	1.11111
1233	2	47641844	Intron 5-6	A	G	-	10588	1	0.00944465
1234	2	47641955	Intron 5-6	A	G	rs200938257	10588	1	0.00944465
1235	2	47641968	Intron 5-6	G	C	rs947243658	10588	1	0.00944465
1236	2	47641968	Intron 5-6	G	A	-	10588	1	0.00944465
1237	2	47641982	Intron 5-6	C	G	-	10588	1	0.00944465
1238	2	47641995	Intron 5-6	C	G	-	10588	1	0.00944465
1239	2	47641997	Intron 5-6	T	C	rs145526973	13245	4.5	0.0339751
1240	2	47642001	Intron 5-6	C	G	-	10588	1	0.00944465
1241	2	47642005	Intron 5-6	C	T	rs993882677	13245	2	0.0151
1242	2	47642005	Intron 5-6	C	A	-	10588	1.5	0.014167
1243	2	47642017	Intron 5-6	A	G	-	10588	1	0.00944465
1244	2	47642026	Intron 5-6	T	G	-	10588	1.5	0.014167
1245	2	47642067	Intron 5-6	A	G	-	10588	1	0.00944465
1246	2	47642069	Intron 5-6	A	G	-	10588	1	0.00944465
1247	2	47642082	Intron 5-6	A	T	-	10588	1	0.00944465
1248	2	47642098	Intron 5-6	C	T	-	10588	1	0.00944465
1249	2	47642111	Intron 5-6	T	G	-	10588	1	0.00944465
1250	2	47642112	Intron 5-6	G	C	rs988804838	10588	1	0.00944465
1251	2	47642114	Intron 5-6	T	C	-	10588	1	0.00944465
1252	2	47642116	Intron 5-6	C	T	rs376645565	10588	1	0.00944465
1253	2	47642120	Intron 5-6	C	T	rs528235582	13245	2	0.0151
1254	2	47642131	Intron 5-6	C	G	-	10588	1	0.00944465
1255	2	47642140	Intron 5-6	C	T	-	10588	1	0.00944465
1256	2	47642145	Intron 5-6	A	G	-	10588	1	0.00944465
1257	2	47642149	Intron 5-6	G	A	rs561762447	2657	1	0.0376364
1258	2	47642180	Intron 5-6	G	T	rs72884648	13335	381	2.85714
1259	2	47642186	Intron 5-6	T	G	-	10588	1	0.00944465
1260	2	47642205	Intron 5-6	C	T	-	10588	1	0.00944465
1261	2	47642206	Intron 5-6	C	T	rs1016856759	10588	1	0.00944465
1262	2	47642230	Intron 5-6	T	C	-	13245	5	0.0377501
1263	2	47642234	Intron 5-6	A	G	-	10588	1	0.00944465
1264	2	47642240	Intron 5-6	T	G	-	10588	1	0.00944465
1265	2	47642241	Intron 5-6	C	G	-	10588	1	0.00944465
1266	2	47642241	Intron 5-6	C	T	-	10588	1	0.00944465
1267	2	47642267	Intron 5-6	G	T	rs140771822	13245	92.5	0.698377
1268	2	47642277	Intron 5-6	C	T	-	10588	1	0.00944465
1269	2	47642295	Intron 5-6	C	G	rs534364525	13245	55.5	0.419026
1270	2	47642302	Intron 5-6	T	-	-	13245	4.5	0.0339751
1271	2	47642350	Intron 5-6	A	G	rs114026303	13245	308	2.32541
1272	2	47642356	Intron 5-6	A	G	-	10588	1	0.00944465
1273	2	47642360	Intron 5-6	A	G	-	10588	1	0.00944465
1274	2	47642367	Intron 5-6	C	G	rs535525124	13245	3	0.0226501
1275	2	47642380	Intron 5-6	C	T	-	10588	1	0.00944465
1276	2	47642396	Intron 5-6	G	C	rs1039414384	13245	29.5	0.222726
1277	2	47642411	Intron 5-6	T	C	-	10588	1	0.00944465
1278	2	47642416	Intron 5-6	T	C	-	13245	4	0.0302001
1279	2	47642431	Intron 5-6	C	T	-	10588	1	0.00944465
1280	2	47642433	Intron 5-6	G	A	-	10588	1	0.00944465
1281	2	47642464	Intron 5-6	G	A	-	10587	1	0.00944555
1282	2	47642477	Intron 5-6	C	T	rs151112960	13245	6.5	0.0490751
1283	2	47642478	Intron 5-6	G	C	rs141060438	13245	182	1.3741
1284	2	47642478	Intron 5-6	G	A	rs141060438	10588	1	0.00944465
1285	2	47642479	Intron 5-6	A	T	-	10588	1	0.00944465
1286	2	47642490	Intron 5-6	T	C	rs963721622	10587	1	0.00944555
1287	2	47642494	Intron 5-6	G	T	-	10587	1	0.00944555
1288	2	47642495	Intron 5-6	C	T	-	10587	1	0.00944555
1289	2	47642510	Intron 5-6	G	C	-	2657	1	0.0376364
1290	2	47642551	Intron 5-6	A	G	-	10588	1	0.00944465
1291	2	47642555	Intron 5-6	G	A	-	10588	1	0.00944465
1292	2	47642566	Intron 5-6	A	G	-	2657	1	0.0376364
1293	2	47642581	Intron 5-6	T	C	-	13237	4	0.0302183
1294	2	47642623	Intron 5-6	G	A	rs111847603	13244	21.5	0.162338
1295	2	47642631	Intron 5-6	A	G	-	10588	1	0.00944465
1296	2	47642640	Intron 5-6	G	A	-	10588	1	0.00944465
1297	2	47642643	Intron 5-6	C	A	-	13245	5.5	0.0415251
1298	2	47642659	Intron 5-6	G	T	-	10588	1	0.00944465
1299	2	47642670	Intron 5-6	A	C	-	10588	3	0.028334
1300	2	47642672	Intron 5-6	C	G	-	10588	1	0.00944465
1301	2	47642676	Intron 5-6	C	G	-	10588	1	0.00944465
1302	2	47642691	Intron 5-6	C	G	-	10588	1	0.00944465
1303	2	47642695	Intron 5-6	G	A	rs143117586	10588	1	0.00944465
1304	2	47642705	Intron 5-6	A	G	rs929906806	13245	9	0.0679502
1305	2	47642709	Intron 5-6	G	C	rs371528502	10588	1	0.00944465
1306	2	47642710	Intron 5-6	C	T	-	10588	2	0.0188893
1307	2	47642723	Intron 5-6	C	T	-	10588	1	0.00944465
1308	2	47642724	Intron 5-6	G	A	rs894706451	10588	1	0.00944465
1309	2	47642771	Intron 5-6	G	A	-	10588	1	0.00944465
1310	2	47642775	Intron 5-6	C	G	rs147049449	10588	1	0.00944465
1311	2	47642785	Intron 5-6	G	T	rs549455224	10588	2.5	0.0236116
1312	2	47642791	Intron 5-6	C	A	-	10588	1	0.00944465
1313	2	47642816	Intron 5-6	C	T	-	2657	1	0.0376364
1314	2	47642823	Intron 5-6	C	T	rs560182457	13245	23.5	0.177425
1315	2	47642823	Intron 5-6	C	A	rs560182457	10588	1	0.00944465
1316	2	47642824	Intron 5-6	G	A	rs527817928	10588	1	0.00944465
1317	2	47642839	Intron 5-6	T	A	rs909833994	13335	32	0.23997
1318	2	47642850	Intron 5-6	G	T	-	13245	3	0.0226501
1319	2	47642859	Intron 5-6	A	C	rs190273292	13245	174.5	1.31748
1320	2	47642887	Intron 5-6	A	C	rs1050794765	13245	45	0.339751
1321	2	47642931	Intron 5-6	G	C	-	610	1	0.163934
1322	2	47642935	Intron 5-6	C	T	rs17217863	13245	3.5	0.0264251
1323	2	47642942	Intron 5-6	C	T	-	13245	3.5	0.0264251
1324	2	47642959	Intron 5-6	C	T	rs1029957063	2657	1	0.0376364
1325	2	47642985	Intron 5-6	T	C	rs556948894	10588	1	0.00944465
1326	2	47642987	Intron 5-6	A	G	-	10588	1	0.00944465
1327	2	47642990	Intron 5-6	T	C	-	10588	1	0.00944465
1328	2	47642997	Intron 5-6	A	G	rs1004088733	13245	20	0.151
1329	2	47643059	Intron 5-6	G	A	-	10588	2	0.0188893
1330	2	47643074	Intron 5-6	G	C	-	10588	1	0.00944465
1331	2	47643075	Intron 5-6	C	T	rs772282157	10588	1	0.00944465
1332	2	47643076	Intron 5-6	G	A	rs936283368	13245	3	0.0226501
1333	2	47643078	Intron 5-6	C	G	-	10588	1	0.00944465
1334	2	47643089	Intron 5-6	G	A	-	10588	1	0.00944465
1335	2	47643093	Intron 5-6	C	T	-	10588	1	0.00944465
1336	2	47643095	Intron 5-6	C	G	-	10588	2	0.0188893
1337	2	47643096	Intron 5-6	G	A	rs17224262	13335	124.5	0.933633
1338	2	47643107	Intron 5-6	G	A	-	2657	1	0.0376364
1339	2	47643126	Intron 5-6	C	A	-	10588	1	0.00944465
1340	2	47643140	Intron 5-6	-	T	-	10588	1	0.00944465
1341	2	47643146	Intron 5-6	G	A	rs138313935	10588	1	0.00944465
1342	2	47643180	Intron 5-6	G	T	-	10588	1	0.00944465
1343	2	47643191	Intron 5-6	C	G	rs11691516	14542	11210.5	77.0905
1344	2	47643196	Intron 5-6	C	A	rs190866837	13245	5.5	0.0415251
1345	2	47643199	Intron 5-6	G	C	-	10588	1	0.00944465
1346	2	47643220	Intron 5-6	TG	-	-	10588	1	0.00944465
1347	2	47643246	Intron 5-6	C	T	-	10588	1	0.00944465
1348	2	47643274	Intron 5-6	C	T	rs17224276	13855	230	1.66005
1349	2	47643275	Intron 5-6	G	A	rs73927793	10588	1	0.00944465
1350	2	47643298	Intron 5-6	C	G	rs533561209	10588	1	0.00944465
1351	2	47643299	Intron 5-6	T	G	-	10588	1	0.00944465
1352	2	47643305	Intron 5-6	A	G	-	10588	1.5	0.014167
1353	2	47643318	Intron 5-6	G	A	rs1051398312	10588	1.5	0.014167
1354	2	47643349	Intron 5-6	T	C	-	10588	1	0.00944465
1355	2	47643364	Intron 5-6	G	A	-	13245	2	0.0151
1356	2	47643376	Intron 5-6	G	T	-	10588	1	0.00944465
1357	2	47643376	Intron 5-6	G	A	-	11198	2	0.0178603
1358	2	47643390	Intron 5-6	A	G	-	10588	1	0.00944465
1359	2	47643412	Intron 5-6	C	T	-	10588	2	0.0188893
1360	2	47643419	Intron 5-6	A	T	-	10588	1	0.00944465
1361	2	47643429	Intron 5-6	T	G	-	10588	1	0.00944465
1362	2	47643431	Intron 5-6	C	G	-	11198	2	0.0178603
1363	2	47643573	Intron 6-7	G	A	-	14890	6.5	0.0436535
1364	2	47643577	Intron 6-7	T	C	rs939824082	10588	1	0.00944465
1365	2	47643578	Intron 6-7	T	C	-	10588	1	0.00944465
1366	2	47643584	Intron 6-7	A	C	rs527646904	17547	18	0.102582
1367	2	47643591	Intron 6-7	C	T	rs377417056	18157	29	0.159718
1368	2	47643607	Intron 6-7	C	T	-	10588	1	0.00944465
1369	2	47643608	Intron 6-7	C	T	-	10588	1	0.00944465
1370	2	47643609	Intron 6-7	T	C	-	10588	1	0.00944465
1371	2	47643622	Intron 6-7	A	G	rs981620884	10588	1	0.00944465
1372	2	47643636	Intron 6-7	TA	-	-	4302	1	0.023245
1373	2	47643638	Intron 6-7	T	C	rs765063302	10588	1	0.00944465
1374	2	47643647	Intron 6-7	G	T	-	10588	1	0.00944465
1375	2	47643653	Intron 6-7	T	A	-	2657	1	0.0376364
1376	2	47643659	Intron 6-7	G	C	-	10588	1	0.00944465
1377	2	47643684	Intron 6-7	G	C	rs761079330	11198	2.5	0.0223254
1378	2	47643688	Intron 6-7	A	T	-	10588	1	0.00944465
1379	2	47643726	Intron 6-7	G	T	-	13245	2.5	0.018875
1380	2	47643732	Intron 6-7	T	-	-	13245	38.5	0.290676
1381	2	47643747	Intron 6-7	T	-	rs398080226	610	11	1.80328
1382	2	47643749	Intron 6-7	T	C	-	2657	1	0.0376364
1383	2	47643763	Intron 6-7	A	G	rs766607762	10588	1	0.00944465
1384	2	47643769	Intron 6-7	TTTAT	-	-	10588	1	0.00944465
1385	2	47643770	Intron 6-7	T	C	-	10588	1	0.00944465
1386	2	47643778	Intron 6-7	A	T	-	10588	1	0.00944465
1387	2	47643798	Intron 6-7	G	A	rs17217891	10588	1	0.00944465
1388	2	47643820	Intron 6-7	A	T	-	2657	1	0.0376364
1389	2	47643823	Intron 6-7	G	A	rs551020900	10588	1	0.00944465
1390	2	47643831	Intron 6-7	A	G	-	2657	1	0.0376364
1391	2	47643837	Intron 6-7	C	T	-	2657	1	0.0376364
1392	2	47643863	Intron 6-7	C	T	-	10588	1	0.00944465
1393	2	47643883	Intron 6-7	AG	-	-	10588	1	0.00944465
1394	2	47643896	Intron 6-7	T	C	-	2657	1	0.0376364
1395	2	47643919	Intron 6-7	T	C	-	10588	1	0.00944465
1396	2	47643922	Intron 6-7	A	G	-	2657	1	0.0376364
1397	2	47644002	Intron 6-7	A	G	-	10588	1	0.00944465
1398	2	47644051	Intron 6-7	T	G	-	10588	1	0.00944465
1399	2	47644074	Intron 6-7	-	T	-	10588	1	0.00944465
1400	2	47644078	Intron 6-7	C	T	-	10588	1	0.00944465
1401	2	47644085	Intron 6-7	T	C	-	10588	1	0.00944465
1402	2	47644109	Intron 6-7	A	G	-	10588	1	0.00944465
1403	2	47644135	Intron 6-7	A	G	-	10588	1	0.00944465
1404	2	47644141	Intron 6-7	A	T	-	10588	1	0.00944465
1405	2	47644142	Intron 6-7	T	A	-	10588	1	0.00944465
1406	2	47644147	Intron 6-7	G	C	rs192456542	13245	48	0.362401
1407	2	47644147	Intron 6-7	G	A	-	10588	1	0.00944465
1408	2	47644156	Intron 6-7	C	-	-	10588	1	0.00944465
1409	2	47644231	Intron 6-7	G	T	-	10588	1	0.00944465
1410	2	47644234	Intron 6-7	A	G	-	2657	1	0.0376364
1411	2	47644242	Intron 6-7	T	G	-	10588	1	0.00944465
1412	2	47644243	Intron 6-7	G	A	-	10588	1	0.00944465
1413	2	47644245	Intron 6-7	G	A	-	10588	1	0.00944465
1414	2	47644249	Intron 6-7	G	C	-	13245	2	0.0151
1415	2	47644260	Intron 6-7	C	G	rs17224297	13245	4.5	0.0339751
1416	2	47644263	Intron 6-7	A	G	rs868002758	2657	1	0.0376364
1417	2	47644289	Intron 6-7	A	C	-	2657	1	0.0376364
1418	2	47644301	Intron 6-7	G	T	-	10588	1	0.00944465
1419	2	47644311	Intron 6-7	C	T	rs17224304	13245	249	1.87995
1420	2	47644314	Intron 6-7	A	G	-	10588	1	0.00944465
1421	2	47644318	Intron 6-7	C	G	-	2657	1	0.0376364
1422	2	47644323	Intron 6-7	C	G	rs564048190	10678	6.5	0.0608728
1423	2	47644324	Intron 6-7	C	A	-	13245	4	0.0302001
1424	2	47644329	Intron 6-7	T	C	-	10588	1	0.00944465
1425	2	47644330	Intron 6-7	G	A	-	10588	1	0.00944465
1426	2	47644342	Intron 6-7	G	A	-	13245	3	0.0226501
1427	2	47644346	Intron 6-7	C	T	rs923768745	10588	2	0.0188893
1428	2	47644362	Intron 6-7	G	A	rs945296599	597	1	0.167504
1429	2	47644384	Intron 6-7	A	C	-	10588	1	0.00944465
1430	2	47644385	Intron 6-7	G	C	rs936587662	2657	1	0.0376364
1431	2	47644410	Intron 6-7	G	A	rs113252828	13245	13	0.0981502
1432	2	47644418	Intron 6-7	C	T	rs1046029475	10588	2	0.0188893
1433	2	47644419	Intron 6-7	G	A	rs540262390	10588	1	0.00944465
1434	2	47644423	Intron 6-7	G	C	-	2657	1	0.0376364
1435	2	47644440	Intron 6-7	C	T	-	10588	1	0.00944465
1436	2	47644463	Intron 6-7	C	A	rs945660111	10588	1	0.00944465
1437	2	47644469	Intron 6-7	G	-	-	10588	1	0.00944465
1438	2	47644480	Intron 6-7	T	G	-	10588	1	0.00944465
1439	2	47644520	Intron 6-7	T	A	-	10588	1	0.00944465
1440	2	47644528	Intron 6-7	A	G	-	13245	7	0.0528501
1441	2	47644536	Intron 6-7	AAAA	-	-	10588	2	0.0188893
1442	2	47644573	Intron 6-7	C	T	-	10588	1	0.00944465
1443	2	47644574	Intron 6-7	A	G	rs114183741	10588	3	0.028334
1444	2	47644596	Intron 6-7	G	A	-	2657	1	0.0376364
1445	2	47644670	Intron 6-7	A	-	-	13245	38	0.286901
1446	2	47644670	Intron 6-7	-	A	rs978447518	10588	19.5	0.184171
1447	2	47644682	Intron 6-7	T	G	rs536342846	2657	2	0.0752729
1448	2	47644705	Intron 6-7	T	G	-	10588	1	0.00944465
1449	2	47644724	Intron 6-7	C	T	rs543427780	13245	5	0.0377501
1450	2	47644735	Intron 6-7	G	A	rs376297108	10588	2.5	0.0236116
1451	2	47644781	Intron 6-7	G	C	-	10588	1	0.00944465
1452	2	47644786	Intron 6-7	C	T	-	13245	3	0.0226501
1453	2	47644804	Intron 6-7	A	G	-	10588	1.5	0.014167
1454	2	47644820	Intron 6-7	C	T	-	10588	1	0.00944465
1455	2	47644830	Intron 6-7	C	T	rs978491068	10588	1	0.00944465
1456	2	47644844	Intron 6-7	A	G	rs17224311	14542	1991.5	13.6948
1457	2	47644860	Intron 6-7	A	T	-	10588	1	0.00944465
1458	2	47644862	Intron 6-7	G	A	-	10588	1	0.00944465
1459	2	47644873	Intron 6-7	C	T	-	10588	1	0.00944465
1460	2	47644874	Intron 6-7	C	T	rs559683465	10588	1	0.00944465
1461	2	47644876	Intron 6-7	C	A	-	2657	2	0.0752729
1462	2	47644884	Intron 6-7	C	G	-	10588	1	0.00944465
1463	2	47644888	Intron 6-7	C	T	-	10588	1	0.00944465
1464	2	47644893	Intron 6-7	T	C	-	10588	1.5	0.014167
1465	2	47644894	Intron 6-7	-	CAA	-	13245	2	0.0151
1466	2	47644923	Intron 6-7	G	C	-	2657	1	0.0376364
1467	2	47644931	Intron 6-7	T	C	-	10588	1	0.00944465
1468	2	47644933	Intron 6-7	C	T	-	13245	3	0.0226501
1469	2	47644938	Intron 6-7	C	G	-	10588	1	0.00944465
1470	2	47644949	Intron 6-7	A	G	-	10588	1	0.00944465
1471	2	47644952	Intron 6-7	A	G	-	10588	1	0.00944465
1472	2	47644955	Intron 6-7	G	A	-	10588	1	0.00944465
1473	2	47644961	Intron 6-7	C	T	rs370386600	10588	1	0.00944465
1474	2	47644967	Intron 6-7	C	G	-	10588	1	0.00944465
1475	2	47644981	Intron 6-7	C	G	-	10588	1	0.00944465
1476	2	47644998	Intron 6-7	G	A	rs17217905	10588	1	0.00944465
1477	2	47645008	Intron 6-7	G	T	-	10588	2	0.0188893
1478	2	47645017	Intron 6-7	A	C	rs17217912	13932	1998.5	14.3447
1479	2	47645050	Intron 6-7	G	A	-	10588	1	0.00944465
1480	2	47645056	Intron 6-7	G	A	-	10588	1	0.00944465
1481	2	47645065	Intron 6-7	A	-	-	10588	1	0.00944465
1482	2	47645070	Intron 6-7	G	C	rs549826727	13245	19	0.14345
1483	2	47645074	Intron 6-7	C	T	-	2657	1	0.0376364
1484	2	47645087	Intron 6-7	T	C	rs571292974	10588	2	0.0188893
1485	2	47645102	Intron 6-7	C	G	-	10588	1	0.00944465
1486	2	47645113	Intron 6-7	G	T	-	610	1	0.163934
1487	2	47645117	Intron 6-7	A	C	rs552608558	10678	6.5	0.0608728
1488	2	47645119	Intron 6-7	C	T	rs149216375	2657	1	0.0376364
1489	2	47645131	Intron 6-7	-	CAAACAAA	-	10588	2	0.0188893
1490	2	47645131	Intron 6-7	-	CAAA	rs953089405	10588	1	0.00944465
1491	2	47645131	Intron 6-7	CAAA	-	-	10588	3	0.028334
1492	2	47645192	Intron 6-7	A	C	-	10588	1	0.00944465
1493	2	47645200	Intron 6-7	G	A	-	13245	4	0.0302001
1494	2	47645238	Intron 6-7	A	T	-	10588	1	0.00944465
1495	2	47645243	Intron 6-7	C	T	-	10588	1	0.00944465
1496	2	47645249	Intron 6-7	G	T	rs10191478	14542	11102.5	76.3478
1497	2	47645259	Intron 6-7	A	G	-	2657	1	0.0376364
1498	2	47645260	Intron 6-7	T	C	rs758479199	10588	2	0.0188893
1499	2	47645272	Intron 6-7	G	A	rs777664829	13245	2	0.0151
1500	2	47645272	Intron 6-7	G	T	rs777664829	10588	1	0.00944465
1501	2	47645303	Intron 6-7	G	A	rs781404417	13245	4.5	0.0339751
1502	2	47645315	Intron 6-7	G	A	-	10588	1	0.00944465
1503	2	47645326	Intron 6-7	AG	-	-	10588	1	0.00944465
1504	2	47645349	Intron 6-7	T	A	-	10588	1.5	0.014167
1505	2	47645352	Intron 6-7	G	C	-	10588	1	0.00944465
1506	2	47645356	Intron 6-7	G	A	rs546637463	10588	2	0.0188893
1507	2	47645375	Intron 6-7	A	G	-	10588	1	0.00944465
1508	2	47645407	Intron 6-7	T	C	-	10588	1	0.00944465
1509	2	47645409	Intron 6-7	C	T	rs542427170	10588	5.5	0.0519456
1510	2	47645415	Intron 6-7	A	C	-	10588	1	0.00944465
1511	2	47645435	Intron 6-7	G	A	-	13245	3	0.0226501
1512	2	47645464	Intron 6-7	C	T	-	10588	1	0.00944465
1513	2	47645472	Intron 6-7	G	C	rs372343508	13245	10	0.0755002
1514	2	47645473	Intron 6-7	C	A	-	2657	1	0.0376364
1515	2	47645490	Intron 6-7	G	A	-	10588	1	0.00944465
1516	2	47645510	Intron 6-7	C	T	-	10588	1	0.00944465
1517	2	47645520	Intron 6-7	A	G	-	10588	3	0.028334
1518	2	47645531	Intron 6-7	C	T	rs943281767	10588	1	0.00944465
1519	2	47645578	Intron 6-7	C	T	-	10588	5.5	0.0519456
1520	2	47645609	Intron 6-7	C	G	-	10588	1	0.00944465
1521	2	47645612	Intron 6-7	G	A	-	10588	1	0.00944465
1522	2	47645615	Intron 6-7	T	C	-	10588	1	0.00944465
1523	2	47645618	Intron 6-7	C	A	-	13245	5	0.0377501
1524	2	47645618	Intron 6-7	C	T	-	610	1	0.163934
1525	2	47645633	Intron 6-7	T	C	-	10588	3	0.028334
1526	2	47645649	Intron 6-7	G	A	rs77522074	13245	15.5	0.117025
1527	2	47645681	Intron 6-7	G	A	-	13245	12.5	0.0943752
1528	2	47645701	Intron 6-7	A	C	-	10588	2	0.0188893
1529	2	47645718	Intron 6-7	A	C	-	10588	1	0.00944465
1530	2	47645739	Intron 6-7	C	T	rs966720417	10588	1	0.00944465
1531	2	47645740	Intron 6-7	C	A	-	13245	2	0.0151
1532	2	47645759	Intron 6-7	G	C	rs548343091	2657	1	0.0376364
1533	2	47645807	Intron 6-7	A	G	-	10588	1	0.00944465
1534	2	47645824	Intron 6-7	A	C	-	10588	1	0.00944465
1535	2	47645829	Intron 6-7	-	TA	-	10588	1	0.00944465
1536	2	47645837	Intron 6-7	C	T	rs189698258	13335	24.5	0.183727
1537	2	47645840	Intron 6-7	G	C	-	2657	1	0.0376364
1538	2	47645900	Intron 6-7	A	G	rs569005048	10588	1	0.00944465
1539	2	47645901	Intron 6-7	T	C	-	10588	1	0.00944465
1540	2	47645906	Intron 6-7	A	G	rs988326221	10588	1	0.00944465
1541	2	47645937	Intron 6-7	C	T	-	10588	3	0.028334
1542	2	47645950	Intron 6-7	A	G	-	13245	5	0.0377501
1543	2	47645965	Intron 6-7	G	C	-	10588	1	0.00944465
1544	2	47645983	Intron 6-7	A	G	-	10588	1	0.00944465
1545	2	47645992	Intron 6-7	T	G	-	10588	1	0.00944465
1546	2	47645995	Intron 6-7	T	A	-	10588	1	0.00944465
1547	2	47646001	Intron 6-7	C	A	rs999773706	10588	2	0.0188893
1548	2	47646001	Intron 6-7	C	G	-	10588	1	0.00944465
1549	2	47646002	Intron 6-7	C	T	rs150192105	10588	1	0.00944465
1550	2	47646007	Intron 6-7	C	A	-	10588	1	0.00944465
1551	2	47646023	Intron 6-7	A	C	-	10588	1	0.00944465
1552	2	47646042	Intron 6-7	C	A	-	10588	1	0.00944465
1553	2	47646054	Intron 6-7	G	A	-	2657	1	0.0376364
1554	2	47646057	Intron 6-7	A	T	-	10588	1	0.00944465
1555	2	47646059	Intron 6-7	C	T	rs192447065	10588	1	0.00944465
1556	2	47646072	Intron 6-7	T	A	-	10588	1	0.00944465
1557	2	47646087	Intron 6-7	A	G	-	10588	1	0.00944465
1558	2	47646131	Intron 6-7	A	G	-	10588	4	0.0377786
1559	2	47646143	Intron 6-7	T	C	-	10588	1	0.00944465
1560	2	47646154	Intron 6-7	TTTTTCTTCA	-	-	10588	1	0.00944465
1561	2	47646157	Intron 6-7	T	G	-	10588	1	0.00944465
1562	2	47646168	Intron 6-7	T	C	-	13245	2	0.0151
1563	2	47646189	Intron 6-7	A	G	rs146264694	10588	1.5	0.014167
1564	2	47646204	Intron 6-7	TC	-	-	10588	1	0.00944465
1565	2	47646224	Intron 6-7	C	T	-	2657	1	0.0376364
1566	2	47646226	Intron 6-7	C	T	-	10588	1	0.00944465
1567	2	47646242	Intron 6-7	C	T	-	13245	12.5	0.0943752
1568	2	47646243	Intron 6-7	G	A	-	13245	22	0.1661
1569	2	47646280	Intron 6-7	C	T	rs189502471	10588	1	0.00944465
1570	2	47646281	Intron 6-7	G	A	rs570630846	13245	11.5	0.0868252
1571	2	47646289	Intron 6-7	T	C	-	10588	1	0.00944465
1572	2	47646299	Intron 6-7	G	T	-	10588	1	0.00944465
1573	2	47646309	Intron 6-7	T	C	-	10588	1	0.00944465
1574	2	47646313	Intron 6-7	C	T	-	10588	1.5	0.014167
1575	2	47646314	Intron 6-7	C	T	-	10588	1	0.00944465
1576	2	47646320	Intron 6-7	C	T	rs926900887	13245	3	0.0226501
1577	2	47646346	Intron 6-7	A	G	-	13245	6	0.0453001
1578	2	47646349	Intron 6-7	C	T	-	10588	1	0.00944465
1579	2	47646353	Intron 6-7	C	T	rs960974318	10588	1	0.00944465
1580	2	47646354	Intron 6-7	G	A	-	10588	1	0.00944465
1581	2	47646361	Intron 6-7	C	T	-	10588	1	0.00944465
1582	2	47646362	Intron 6-7	G	A	rs919239863	10588	1	0.00944465
1583	2	47646368	Intron 6-7	C	G	-	10588	1	0.00944465
1584	2	47646395	Intron 6-7	G	T	-	10588	1	0.00944465
1585	2	47646403	Intron 6-7	A	G	-	2657	1	0.0376364
1586	2	47646407	Intron 6-7	GGTCAGGCT	-	-	10588	1	0.00944465
1587	2	47646411	Intron 6-7	C	T	rs368659726	10588	1	0.00944465
1588	2	47646430	Intron 6-7	C	T	rs186101253	10588	2	0.0188893
1589	2	47646434	Intron 6-7	C	T	-	10588	1	0.00944465
1590	2	47646436	Intron 6-7	C	T	rs891422905	13245	2	0.0151
1591	2	47646437	Intron 6-7	G	A	-	10588	3.5	0.0330563
1592	2	47646447	Intron 6-7	C	T	-	10588	1	0.00944465
1593	2	47646454	Intron 6-7	C	T	rs749888208	13245	17	0.12835
1594	2	47646483	Intron 6-7	TGAGCCAC	-	-	10588	3.5	0.0330563
1595	2	47646510	Intron 6-7	T	G	-	10588	1	0.00944465
1596	2	47646526	Intron 6-7	C	G	-	2657	1	0.0376364
1597	2	47646535	Intron 6-7	G	A	-	10588	1	0.00944465
1598	2	47646563	Intron 6-7	T	A	-	10588	1	0.00944465
1599	2	47646567	Intron 6-7	C	T	-	13245	8	0.0604002
1600	2	47646571	Intron 6-7	C	T	rs1006013992	2657	1	0.0376364
1601	2	47646572	Intron 6-7	G	A	rs756678652	10588	1	0.00944465
1602	2	47646608	Intron 6-7	C	T	rs571890740	10588	1	0.00944465
1603	2	47646611	Intron 6-7	C	G	-	13245	12	0.0906002
1604	2	47646615	Intron 6-7	-	TCTGC	-	10588	1	0.00944465
1605	2	47646620	Intron 6-7	C	G	-	610	1	0.163934
1606	2	47646622	Intron 6-7	G	T	-	10588	1	0.00944465
1607	2	47646649	Intron 6-7	C	A	-	2657	1	0.0376364
1608	2	47646676	Intron 6-7	T	C	-	10588	1	0.00944465
1609	2	47646681	Intron 6-7	T	C	rs77246987	13335	2693	20.195
1610	2	47646682	Intron 6-7	C	G	rs80311896	14542	1991	13.6914
1611	2	47646684	Intron 6-7	C	G	-	10588	1	0.00944465
1612	2	47646692	Intron 6-7	A	G	-	10588	1	0.00944465
1613	2	47646695	Intron 6-7	C	T	-	10588	1	0.00944465
1614	2	47646716	Intron 6-7	C	T	-	10588	1	0.00944465
1615	2	47646733	Intron 6-7	C	G	-	10588	1	0.00944465
1616	2	47646736	Intron 6-7	T	-	-	10588	1.5	0.014167
1617	2	47646749	Intron 6-7	-	T	rs149685692	597	1	0.167504
1618	2	47646785	Intron 6-7	T	C	-	10588	1.5	0.014167
1619	2	47646786	Intron 6-7	C	A	-	10588	20.5	0.193615
1620	2	47646823	Intron 6-7	A	G	-	10588	1	0.00944465
1621	2	47646826	Intron 6-7	C	T	-	2657	1	0.0376364
1622	2	47646828	Intron 6-7	C	A	rs745466598	10588	2	0.0188893
1623	2	47646832	Intron 6-7	C	T	-	10588	1	0.00944465
1624	2	47646849	Intron 6-7	G	A	rs970641486	10588	1	0.00944465
1625	2	47646850	Intron 6-7	C	T	-	10588	1	0.00944465
1626	2	47646852	Intron 6-7	G	-	-	10588	1	0.00944465
1627	2	47646857	Intron 6-7	T	C	-	2657	1	0.0376364
1628	2	47646877	Intron 6-7	C	T	-	10588	1	0.00944465
1629	2	47646878	Intron 6-7	C	T	rs191370603	10588	1	0.00944465
1630	2	47646879	Intron 6-7	C	T	-	10588	3	0.028334
1631	2	47646880	Intron 6-7	G	A	rs1014161971	2657	1	0.0376364
1632	2	47646890	Intron 6-7	G	T	-	10588	1	0.00944465
1633	2	47646894	Intron 6-7	C	A	rs58011858	13932	2339.5	16.7923
1634	2	47646896	Intron 6-7	C	G	-	10587	1	0.00944555
1635	2	47646897	Intron 6-7	T	C	-	2657	1	0.0376364
1636	2	47646900	Intron 6-7	CATT	-	-	10587	1	0.00944555
1637	2	47646902	Intron 6-7	T	-	-	13245	122.5	0.924877
1638	2	47646903	Intron 6-7	T	C	-	2747	7	0.254823
1639	2	47646925	Intron 6-7	T	C	-	13245	2	0.0151
1640	2	47646947	Intron 6-7	C	G	-	10588	1	0.00944465
1641	2	47646950	Intron 6-7	G	A	-	13245	24	0.1812
1642	2	47646968	Intron 6-7	C	T	rs4952887	13932	2083.5	14.9548
1643	2	47646975	Intron 6-7	C	T	-	10588	1	0.00944465
1644	2	47647033	Intron 6-7	T	C	-	10588	1	0.00944465
1645	2	47647040	Intron 6-7	G	A	rs1056915002	10588	6	0.0566679
1646	2	47647048	Intron 6-7	G	T	-	10588	1	0.00944465
1647	2	47647051	Intron 6-7	C	G	rs540164672	10678	2	0.0187301
1648	2	47647078	Intron 6-7	G	A	rs558366201	11198	2	0.0178603
1649	2	47647085	Intron 6-7	C	T	rs764494460	13245	15.5	0.117025
1650	2	47647086	Intron 6-7	G	A	-	10588	1	0.00944465
1651	2	47647091	Intron 6-7	A	C	-	10588	1	0.00944465
1652	2	47647092	Intron 6-7	C	G	-	10588	1	0.00944465
1653	2	47647095	Intron 6-7	C	T	-	10588	1	0.00944465
1654	2	47647119	Intron 6-7	C	T	rs534714245	10588	1	0.00944465
1655	2	47647120	Intron 6-7	G	A	rs1016277054	10588	1.5	0.014167
1656	2	47647134	Intron 6-7	A	G	-	10588	1	0.00944465
1657	2	47647144	Intron 6-7	G	A	-	10588	1	0.00944465
1658	2	47647182	Intron 6-7	A	G	-	2657	1	0.0376364
1659	2	47647207	Intron 6-7	G	A	-	10588	1	0.00944465
1660	2	47647215	Intron 6-7	C	G	-	13245	7.5	0.0566251
1661	2	47647235	Intron 6-7	T	C	-	10588	1	0.00944465
1662	2	47647248	Intron 6-7	C	T	-	10588	1	0.00944465
1663	2	47647252	Intron 6-7	G	A	rs182690963	10588	1	0.00944465
1664	2	47647299	Intron 6-7	A	G	-	10588	1	0.00944465
1665	2	47647306	Intron 6-7	C	T	rs899493536	10588	1.5	0.014167
1666	2	47647307	Intron 6-7	G	A	rs112732699	10588	1	0.00944465
1667	2	47647313	Intron 6-7	G	A	rs541477008	10588	1	0.00944465
1668	2	47647341	Intron 6-7	A	T	-	10588	1	0.00944465
1669	2	47647350	Intron 6-7	T	G	-	10588	1	0.00944465
1670	2	47647353	Intron 6-7	G	C	-	13245	5	0.0377501
1671	2	47647393	Intron 6-7	T	C	-	10588	1	0.00944465
1672	2	47647411	Intron 6-7	C	T	-	10588	1	0.00944465
1673	2	47647434	Intron 6-7	C	T	-	10588	2.5	0.0236116
1674	2	47647440	Intron 6-7	C	T	-	10588	1	0.00944465
1675	2	47647443	Intron 6-7	C	T	-	10588	1.5	0.014167
1676	2	47647443	Intron 6-7	C	G	-	10588	1	0.00944465
1677	2	47647480	Intron 6-7	C	G	-	13245	2.5	0.018875
1678	2	47647528	Intron 6-7	A	G	rs189680957	10588	1	0.00944465
1679	2	47647529	Intron 6-7	A	G	rs183372973	10588	1	0.00944465
1680	2	47647534	Intron 6-7	A	G	-	10588	1	0.00944465
1681	2	47647535	Intron 6-7	A	G	-	10588	1	0.00944465
1682	2	47647537	Intron 6-7	T	C	-	10588	1	0.00944465
1683	2	47647538	Intron 6-7	G	A	-	10588	1.5	0.014167
1684	2	47647538	Intron 6-7	G	C	-	10588	1.5	0.014167
1685	2	47647550	Intron 6-7	T	C	-	10588	1	0.00944465
1686	2	47647560	Intron 6-7	C	G	-	10588	1	0.00944465
1687	2	47647562	Intron 6-7	ATT	-	-	10588	1	0.00944465
1688	2	47647572	Intron 6-7	A	G	rs758284587	10588	1	0.00944465
1689	2	47647596	Intron 6-7	C	T	-	10588	1	0.00944465
1690	2	47647604	Intron 6-7	C	G	rs550972298	10588	1	0.00944465
1691	2	47647604	Intron 6-7	C	T	-	10588	1	0.00944465
1692	2	47647613	Intron 6-7	T	C	-	13245	3	0.0226501
1693	2	47647617	Intron 6-7	C	G	-	10588	1	0.00944465
1694	2	47647628	Intron 6-7	C	T	rs62139715	13245	16	0.1208
1695	2	47647648	Intron 6-7	A	G	-	13245	8.5	0.0641752
1696	2	47647667	Intron 6-7	A	G	-	10588	1	0.00944465
1697	2	47647669	Intron 6-7	C	G	-	10588	1	0.00944465
1698	2	47647673	Intron 6-7	-	CTT	-	10588	1	0.00944465
1699	2	47647685	Intron 6-7	T	C	-	13245	7	0.0528501
1700	2	47647698	Intron 6-7	C	T	-	10588	1.5	0.014167
1701	2	47647702	Intron 6-7	C	G	rs187772681	10588	1	0.00944465
1702	2	47647709	Intron 6-7	G	T	-	10588	1	0.00944465
1703	2	47647712	Intron 6-7	A	-	-	10588	1	0.00944465
1704	2	47647726	Intron 6-7	A	G	rs147946855	13245	4.5	0.0339751
1705	2	47647727	Intron 6-7	T	G	-	10588	1	0.00944465
1706	2	47647730	Intron 6-7	C	A	-	2657	1	0.0376364
1707	2	47647737	Intron 6-7	A	C	rs74964390	10588	1	0.00944465
1708	2	47647740	Intron 6-7	C	G	-	2657	2	0.0752729
1709	2	47647749	Intron 6-7	C	T	-	10588	1	0.00944465
1710	2	47647753	Intron 6-7	A	G	-	10588	1	0.00944465
1711	2	47647774	Intron 6-7	-	T	-	10588	3.5	0.0330563
1712	2	47647816	Intron 6-7	C	T	-	10588	10	0.0944465
1713	2	47647832	Intron 6-7	C	G	-	10588	1	0.00944465
1714	2	47647834	Intron 6-7	A	G	-	2657	2	0.0752729
1715	2	47647838	Intron 6-7	C	T	rs111472231	13245	15.5	0.117025
1716	2	47647853	Intron 6-7	G	T	-	10588	1	0.00944465
1717	2	47647853	Intron 6-7	G	A	-	10588	1	0.00944465
1718	2	47647861	Intron 6-7	T	C	rs956015481	10588	1	0.00944465
1719	2	47647865	Intron 6-7	C	T	-	10588	1.5	0.014167
1720	2	47647871	Intron 6-7	A	G	-	2657	1	0.0376364
1721	2	47647874	Intron 6-7	T	A	-	10588	1	0.00944465
1722	2	47647898	Intron 6-7	C	G	rs147705523	13245	225.5	1.70253
1723	2	47647908	Intron 6-7	C	A	-	10588	1	0.00944465
1724	2	47647914	Intron 6-7	C	T	-	10588	1	0.00944465
1725	2	47647932	Intron 6-7	A	G	rs369921656	13245	7	0.0528501
1726	2	47647977	Intron 6-7	G	A	rs7584126	14542	11120.5	76.4716
1727	2	47647977	Intron 6-7	G	C	-	10588	1	0.00944465
1728	2	47647992	Intron 6-7	G	C	-	10588	1	0.00944465
1729	2	47647995	Intron 6-7	T	C	-	13245	4.5	0.0339751
1730	2	47648010	Intron 6-7	C	G	-	10588	1	0.00944465
1731	2	47648010	Intron 6-7	C	A	-	10588	1	0.00944465
1732	2	47648012	Intron 6-7	C	T	rs1014083059	10588	1	0.00944465
1733	2	47648015	Intron 6-7	T	G	-	10588	1	0.00944465
1734	2	47648017	Intron 6-7	C	T	rs982475199	10588	1	0.00944465
1735	2	47648021	Intron 6-7	C	T	rs540073438	10588	1	0.00944465
1736	2	47648040	Intron 6-7	C	T	rs561945087	10588	2	0.0188893
1737	2	47648041	Intron 6-7	G	A	-	10588	1	0.00944465
1738	2	47648070	Intron 6-7	C	T	-	10588	2	0.0188893
1739	2	47648081	Intron 6-7	C	T	rs529353079	13245	10.5	0.0792752
1740	2	47648086	Intron 6-7	G	A	rs755561942	13245	2	0.0151
1741	2	47648103	Intron 6-7	A	T	rs555524396	13245	73	0.551151
1742	2	47648114	Intron 6-7	C	G	-	10588	1	0.00944465
1743	2	47648145	Intron 6-7	T	G	-	10588	2.5	0.0236116
1744	2	47648148	Intron 6-7	C	T	rs1045556545	13245	3	0.0226501
1745	2	47648179	Intron 6-7	C	A	-	10588	1.5	0.014167
1746	2	47648192	Intron 6-7	C	T	-	10588	1	0.00944465
1747	2	47648193	Intron 6-7	C	A	-	10588	1	0.00944465
1748	2	47648200	Intron 6-7	C	G	-	10588	1	0.00944465
1749	2	47648209	Intron 6-7	A	G	-	10588	1	0.00944465
1750	2	47648219	Intron 6-7	A	G	-	10588	1	0.00944465
1751	2	47648243	Intron 6-7	G	A	-	10588	1	0.00944465
1752	2	47648277	Intron 6-7	A	G	-	10588	2.5	0.0236116
1753	2	47648280	Intron 6-7	C	T	-	10588	1.5	0.014167
1754	2	47648281	Intron 6-7	G	A	-	13245	2	0.0151
1755	2	47648297	Intron 6-7	C	T	-	10588	1	0.00944465
1756	2	47648306	Intron 6-7	C	T	rs188088225	10588	1	0.00944465
1757	2	47648307	Intron 6-7	G	C	-	10588	2.5	0.0236116
1758	2	47648307	Intron 6-7	G	A	-	10588	3.5	0.0330563
1759	2	47648317	Intron 6-7	G	A	-	10588	2	0.0188893
1760	2	47648320	Intron 6-7	C	T	-	10588	1	0.00944465
1761	2	47648323	Intron 6-7	A	C	-	10588	1	0.00944465
1762	2	47648328	Intron 6-7	T	G	-	10588	1	0.00944465
1763	2	47648335	Intron 6-7	C	T	rs192904665	10588	1	0.00944465
1764	2	47648339	Intron 6-7	C	G	-	10588	1	0.00944465
1765	2	47648342	Intron 6-7	G	C	rs775294180	10588	3.5	0.0330563
1766	2	47648347	Intron 6-7	C	T	-	10588	1	0.00944465
1767	2	47648348	Intron 6-7	G	A	rs184519552	10587	1	0.00944555
1768	2	47648364	Intron 6-7	AAAAAA	-	-	2657	10	0.376364
1769	2	47648364	Intron 6-7	AAAAAAA	-	-	2657	41	1.54309
1770	2	47648375	Intron 6-7	A	G	-	2657	1	0.0376364
1771	2	47648389	Intron 6-7	A	G	-	10588	1.5	0.014167
1772	2	47648395	Intron 6-7	A	C	-	10588	1	0.00944465
1773	2	47648395	Intron 6-7	A	G	-	10588	1	0.00944465
1774	2	47648397	Intron 6-7	G	C	-	10588	1	0.00944465
1775	2	47648398	Intron 6-7	T	C	-	10588	1.5	0.014167
1776	2	47648401	Intron 6-7	A	G	-	13245	2	0.0151
1777	2	47648403	Intron 6-7	-	TTAT	-	2657	1	0.0376364
1778	2	47648403	Intron 6-7	C	T	rs116011522	2657	59	2.22055
1779	2	47648403	Intron 6-7	TTATTTATTTAT	-	-	2657	29	1.09146
1780	2	47648410	Intron 6-7	A	T	rs147324920	2657	1	0.0376364
1781	2	47648426	Intron 6-7	T	A	-	10588	1	0.00944465
1782	2	47648427	Intron 6-7	G	T	-	10588	1	0.00944465
1783	2	47648439	Intron 6-7	C	G	-	10588	1	0.00944465
1784	2	47648455	Intron 6-7	C	G	-	10588	1	0.00944465
1785	2	47648465	Intron 6-7	A	G	rs898396865	10588	3	0.028334
1786	2	47648465	Intron 6-7	A	C	-	10588	1	0.00944465
1787	2	47648466	Intron 6-7	T	A	rs535170836	13335	40	0.299963
1788	2	47648469	Intron 6-7	C	G	-	10588	1	0.00944465
1789	2	47648476	Intron 6-7	T	C	-	10588	1	0.00944465
1790	2	47648478	Intron 6-7	A	T	-	2657	2	0.0752729
1791	2	47648479	Intron 6-7	G	A	-	10588	1	0.00944465
1792	2	47648482	Intron 6-7	C	T	rs556688260	2657	1	0.0376364
1793	2	47648483	Intron 6-7	A	G	-	10588	1	0.00944465
1794	2	47648486	Intron 6-7	G	A	-	10588	1	0.00944465
1795	2	47648489	Intron 6-7	A	G	-	2657	1	0.0376364
1796	2	47648494	Intron 6-7	C	T	rs543902825	10588	1	0.00944465
1797	2	47648495	Intron 6-7	G	A	-	10588	1	0.00944465
1798	2	47648496	Intron 6-7	C	T	rs539058634	10588	1	0.00944465
1799	2	47648501	Intron 6-7	C	G	-	10588	1	0.00944465
1800	2	47648501	Intron 6-7	C	T	rs967555692	10588	1	0.00944465
1801	2	47648504	Intron 6-7	G	T	-	10588	1.5	0.014167
1802	2	47648507	Intron 6-7	C	A	-	10588	1	0.00944465
1803	2	47648509	Intron 6-7	G	C	-	10678	6	0.0561903
1804	2	47648512	Intron 6-7	G	A	rs534129611	13245	12	0.0906002
1805	2	47648516	Intron 6-7	C	A	rs555262077	10588	4	0.0377786
1806	2	47648554	Intron 6-7	G	A	rs189206368	10588	1.5	0.014167
1807	2	47648557	Intron 6-7	C	T	-	10588	1	0.00944465
1808	2	47648565	Intron 6-7	C	T	-	10588	20.5	0.193615
1809	2	47648604	Intron 6-7	T	C	-	10588	1	0.00944465
1810	2	47648664	Intron 6-7	C	T	rs549693249	10588	1	0.00944465
1811	2	47648670	Intron 6-7	A	C	-	10588	2	0.0188893
1812	2	47648689	Intron 6-7	G	A	-	10588	1	0.00944465
1813	2	47648707	Intron 6-7	C	A	-	10588	1	0.00944465
1814	2	47648729	Intron 6-7	A	-	-	10588	1	0.00944465
1815	2	47648733	Intron 6-7	A	T	-	10588	1	0.00944465
1816	2	47648733	Intron 6-7	A	G	-	10588	2	0.0188893
1817	2	47648746	Intron 6-7	A	G	-	2657	2	0.0752729
1818	2	47648751	Intron 6-7	A	G	-	10588	2.5	0.0236116
1819	2	47648755	Intron 6-7	G	C	-	10588	1	0.00944465
1820	2	47648775	Intron 6-7	-	AATTCACAAATTCACAAAT	-	2657	1	0.0376364
1821	2	47648778	Intron 6-7	-	TC	-	10588	1.5	0.014167
1822	2	47648779	Intron 6-7	A	T	-	2657	1	0.0376364
1823	2	47648785	Intron 6-7	A	G	-	2657	1	0.0376364
1824	2	47648809	Intron 6-7	G	C	-	10588	1	0.00944465
1825	2	47648831	Intron 6-7	A	G	-	10588	1	0.00944465
1826	2	47648832	Intron 6-7	C	T	rs112506632	13245	3	0.0226501
1827	2	47648835	Intron 6-7	A	G	rs114596849	13245	221	1.66855
1828	2	47648836	Intron 6-7	T	C	-	10588	1	0.00944465
1829	2	47648842	Intron 6-7	A	G	rs566501436	2657	3	0.112909
1830	2	47648845	Intron 6-7	T	C	-	13245	5	0.0377501
1831	2	47648846	Intron 6-7	T	C	-	10588	1	0.00944465
1832	2	47648852	Intron 6-7	C	T	-	10588	1	0.00944465
1833	2	47648863	Intron 6-7	C	G	-	10588	1	0.00944465
1834	2	47648867	Intron 6-7	A	G	rs181867581	10678	2	0.0187301
1835	2	47648872	Intron 6-7	T	A	rs185206278	10588	2.5	0.0236116
1836	2	47648902	Intron 6-7	A	G	rs1050387431	2657	1	0.0376364
1837	2	47648912	Intron 6-7	A	G	-	10588	1	0.00944465
1838	2	47648921	Intron 6-7	A	C	rs368302068	13245	63.5	0.479426
1839	2	47648936	Intron 6-7	A	T	rs545520264	90	1	1.11111
1840	2	47648939	Intron 6-7	G	A	-	10588	2.5	0.0236116
1841	2	47648949	Intron 6-7	A	G	-	2657	1	0.0376364
1842	2	47648969	Intron 6-7	G	T	-	10588	1	0.00944465
1843	2	47648969	Intron 6-7	G	A	-	10588	1	0.00944465
1844	2	47648983	Intron 6-7	T	C	-	10588	1	0.00944465
1845	2	47648985	Intron 6-7	A	G	-	10588	1	0.00944465
1846	2	47649038	Intron 6-7	A	G	rs561260171	10588	1	0.00944465
1847	2	47649058	Intron 6-7	T	A	-	10588	1	0.00944465
1848	2	47649072	Intron 6-7	G	C	-	10588	1	0.00944465
1849	2	47649121	Intron 6-7	C	T	rs897916242	10588	1	0.00944465
1850	2	47649125	Intron 6-7	A	G	-	10588	1	0.00944465
1851	2	47649126	Intron 6-7	T	G	-	10588	1	0.00944465
1852	2	47649129	Intron 6-7	G	A	-	10588	2.5	0.0236116
1853	2	47649149	Intron 6-7	G	A	rs548973700	10588	1	0.00944465
1854	2	47649150	Intron 6-7	C	T	-	10588	1	0.00944465
1855	2	47649156	Intron 6-7	G	C	-	10588	1	0.00944465
1856	2	47649167	Intron 6-7	T	G	-	10588	1	0.00944465
1857	2	47649171	Intron 6-7	C	T	-	10588	1	0.00944465
1858	2	47649176	Intron 6-7	T	G	-	2657	2	0.0752729
1859	2	47649179	Intron 6-7	A	G	rs567587742	13245	14	0.1057
1860	2	47649184	Intron 6-7	ACCT	-	-	2657	1	0.0376364
1861	2	47649184	Intron 6-7	ACCTACCT	-	-	2657	1	0.0376364
1862	2	47649184	Intron 6-7	-	ACCT	rs76606443	10588	352	3.32452
1863	2	47649184	Intron 6-7	-	ACCTACCT	-	10588	1	0.00944465
1864	2	47649193	Intron 6-7	A	C	-	10588	1	0.00944465
1865	2	47649202	Intron 6-7	CTACCTATCTAT	-	-	2657	4	0.150546
1866	2	47649206	Intron 6-7	-	CTAT	rs755730176	2657	2	0.0752729
1867	2	47649210	Intron 6-7	T	C	rs558900680	10588	1.5	0.014167
1868	2	47649215	Intron 6-7	C	G	rs571510408	10587	5.5	0.0519505
1869	2	47649217	Intron 6-7	A	G	rs577119977	13245	4.5	0.0339751
1870	2	47649221	Intron 6-7	A	G	rs774319956	10588	1	0.00944465
1871	2	47649223	Intron 6-7	C	G	-	10588	1	0.00944465
1872	2	47649227	Intron 6-7	C	T	-	10588	1	0.00944465
1873	2	47649230	Intron 6-7	G	T	rs538755879	10588	1	0.00944465
1874	2	47649231	Intron 6-7	A	C	rs554246033	10588	1	0.00944465
1875	2	47649246	Intron 6-7	CTAG	-	-	10588	1	0.00944465
1876	2	47649270	Intron 6-7	AG	-	-	10588	1	0.00944465
1877	2	47649271	Intron 6-7	A	G	rs181398712	13245	82.5	0.622877
1878	2	47649287	Intron 6-7	C	A	-	13245	8.5	0.0641752
1879	2	47649300	Intron 6-7	C	T	rs561860638	13245	2	0.0151
1880	2	47649306	Intron 6-7	T	C	-	10588	1	0.00944465
1881	2	47649315	Intron 6-7	C	A	-	2657	1	0.0376364
1882	2	47649315	Intron 6-7	C	G	rs6741517	13335	2223.5	16.6742
1883	2	47649316	Intron 6-7	A	C	-	13245	10	0.0755002
1884	2	47649335	Intron 6-7	G	A	-	13245	6	0.0453001
1885	2	47649352	Intron 6-7	C	T	rs185510809	10588	1.5	0.014167
1886	2	47649353	Intron 6-7	G	A	rs189925051	13245	3	0.0226501
1887	2	47649353	Intron 6-7	G	T	rs189925051	10588	1	0.00944465
1888	2	47649367	Intron 6-7	C	T	-	10588	1	0.00944465
1889	2	47649368	Intron 6-7	G	A	rs138111113	13335	69.5	0.521185
1890	2	47649375	Intron 6-7	A	G	-	10588	1	0.00944465
1891	2	47649389	Intron 6-7	A	G	rs34519172	14542	1971	13.5538
1892	2	47649418	Intron 6-7	A	G	-	10588	1	0.00944465
1893	2	47649443	Intron 6-7	C	G	-	2657	1	0.0376364
1894	2	47649453	Intron 6-7	A	T	-	10588	1	0.00944465
1895	2	47649467	Intron 6-7	A	G	-	2657	1	0.0376364
1896	2	47649477	Intron 6-7	C	T	-	10588	1	0.00944465
1897	2	47649479	Intron 6-7	G	C	-	10588	2	0.0188893
1898	2	47649486	Intron 6-7	T	A	-	10588	1	0.00944465
1899	2	47649503	Intron 6-7	T	C	-	10588	1	0.00944465
1900	2	47649513	Intron 6-7	C	G	rs57405432	13335	138.5	1.03862
1901	2	47649516	Intron 6-7	G	T	rs571423924	10678	4.5	0.0421427
1902	2	47649522	Intron 6-7	C	T	-	10588	1	0.00944465
1903	2	47649532	Intron 6-7	-	GGCCTGCCTC	-	10588	1	0.00944465
1904	2	47649540	Intron 6-7	C	G	-	10588	1	0.00944465
1905	2	47649542	Intron 6-7	C	T	-	10588	1	0.00944465
1906	2	47649569	Intron 6-7	G	A	rs981780775	10588	2	0.0188893
1907	2	47649571	Intron 6-7	G	C	-	2657	1	0.0376364
1908	2	47649574	Intron 6-7	A	C	-	10588	1	0.00944465
1909	2	47649587	Intron 6-7	G	A	-	10588	1	0.00944465
1910	2	47649587	Intron 6-7	G	T	-	610	1	0.163934
1911	2	47649596	Intron 6-7	C	A	-	2657	1	0.0376364
1912	2	47649596	Intron 6-7	C	G	-	10588	1	0.00944465
1913	2	47649607	Intron 6-7	G	T	-	10588	1	0.00944465
1914	2	47649616	Intron 6-7	C	A	-	10588	1	0.00944465
1915	2	47649617	Intron 6-7	C	T	rs543660506	2657	1	0.0376364
1916	2	47649617	Intron 6-7	C	G	-	10588	1	0.00944465
1917	2	47649622	Intron 6-7	C	T	rs368715866	13245	94	0.709702
1918	2	47649631	Intron 6-7	T	C	-	10588	1	0.00944465
1919	2	47649639	Intron 6-7	-	T	-	2657	4	0.150546
1920	2	47649654	Intron 6-7	C	T	rs866217985	10588	1	0.00944465
1921	2	47649664	Intron 6-7	C	T	rs542786144	13245	46.5	0.351076
1922	2	47649666	Intron 6-7	G	A	rs560866824	10588	20.5	0.193615
1923	2	47649672	Intron 6-7	C	A	-	10588	1	0.00944465
1924	2	47649673	Intron 6-7	C	T	-	2657	1	0.0376364
1925	2	47649678	Intron 6-7	A	C	-	10588	1	0.00944465
1926	2	47649683	Intron 6-7	G	A	-	10588	1	0.00944465
1927	2	47649690	Intron 6-7	G	A	-	10588	1	0.00944465
1928	2	47649694	Intron 6-7	C	T	-	10588	1	0.00944465
1929	2	47649701	Intron 6-7	A	G	rs1040084434	10588	1	0.00944465
1930	2	47649726	Intron 6-7	T	G	-	10588	1	0.00944465
1931	2	47649741	Intron 6-7	A	G	rs1003635093	10588	1	0.00944465
1932	2	47649766	Intron 6-7	G	T	-	10588	1	0.00944465
1933	2	47649781	Intron 6-7	T	A	rs144480058	13335	678	5.08436
1934	2	47649789	Intron 6-7	AA	-	-	13245	21.5	0.162325
1935	2	47649789	Intron 6-7	A	-	-	10588	1712.5	16.174
1936	2	47649789	Intron 6-7	-	A	-	10588	856	8.08462
1937	2	47649790	Intron 6-7	A	-	rs34808139	1207	2	0.1657
1938	2	47649803	Intron 6-7	C	G	rs984289052	10588	1	0.00944465
1939	2	47649808	Intron 6-7	G	T	-	2657	1	0.0376364
1940	2	47649839	Intron 6-7	G	C	-	10588	1	0.00944465
1941	2	47649844	Intron 6-7	C	G	-	10588	1	0.00944465
1942	2	47649845	Intron 6-7	T	C	-	10588	1	0.00944465
1943	2	47649848	Intron 6-7	T	G	rs566644898	10588	1	0.00944465
1944	2	47649877	Intron 6-7	T	C	-	2657	2	0.0752729
1945	2	47649884	Intron 6-7	A	G	rs75533145	10588	1	0.00944465
1946	2	47649891	Intron 6-7	T	G	rs371180616	13245	7	0.0528501
1947	2	47649893	Intron 6-7	C	T	rs893872624	10588	1	0.00944465
1948	2	47649904	Intron 6-7	T	G	-	10588	1	0.00944465
1949	2	47649916	Intron 6-7	A	G	-	10588	1	0.00944465
1950	2	47649924	Intron 6-7	G	T	-	10588	1	0.00944465
1951	2	47649933	Intron 6-7	T	C	-	10588	1	0.00944465
1952	2	47649938	Intron 6-7	A	G	-	10588	1	0.00944465
1953	2	47649941	Intron 6-7	A	G	rs993161309	10588	1	0.00944465
1954	2	47649957	Intron 6-7	TA	-	-	13245	2	0.0151
1955	2	47649970	Intron 6-7	A	G	-	10588	1	0.00944465
1956	2	47649992	Intron 6-7	A	C	rs922852177	10588	1	0.00944465
1957	2	47649996	Intron 6-7	G	A	-	10588	1	0.00944465
1958	2	47649998	Intron 6-7	G	C	-	2657	1	0.0376364
1959	2	47650008	Intron 6-7	T	C	-	10588	1	0.00944465
1960	2	47650016	Intron 6-7	G	T	-	13245	2	0.0151
1961	2	47650029	Intron 6-7	C	A	-	10588	1	0.00944465
1962	2	47650036	Intron 6-7	G	A	-	10588	1	0.00944465
1963	2	47650046	Intron 6-7	T	G	-	13245	4	0.0302001
1964	2	47650070	Intron 6-7	A	C	-	10588	1.5	0.014167
1965	2	47650083	Intron 6-7	TG	-	-	2657	15	0.564546
1966	2	47650103	Intron 6-7	G	A	-	2657	1	0.0376364
1967	2	47650103	Intron 6-7	G	T	rs897729610	10588	1	0.00944465
1968	2	47650113	Intron 6-7	T	C	rs148406388	13245	9	0.0679502
1969	2	47650132	Intron 6-7	A	G	-	13245	2.5	0.018875
1970	2	47650151	Intron 6-7	A	G	-	10588	1	0.00944465
1971	2	47650157	Intron 6-7	G	A	-	10588	1	0.00944465
1972	2	47650181	Intron 6-7	-	T	-	10588	1	0.00944465
1973	2	47650187	Intron 6-7	TA	-	-	10588	1	0.00944465
1974	2	47650221	Intron 6-7	G	T	-	10588	1	0.00944465
1975	2	47650224	Intron 6-7	G	A	rs186903487	13245	18.5	0.139675
1976	2	47650235	Intron 6-7	A	G	-	10588	1	0.00944465
1977	2	47650238	Intron 6-7	T	C	-	10588	1	0.00944465
1978	2	47650240	Intron 6-7	A	G	-	10588	1	0.00944465
1979	2	47650244	Intron 6-7	C	A	rs75745208	13335	2187.5	16.4042
1980	2	47650245	Intron 6-7	T	C	-	2657	1	0.0376364
1981	2	47650247	Intron 6-7	C	-	-	10588	1	0.00944465
1982	2	47650248	Intron 6-7	-	TT	-	10588	1	0.00944465
1983	2	47650256	Intron 6-7	T	C	rs191342870	13335	137.5	1.03112
1984	2	47650262	Intron 6-7	C	T	rs988121194	10588	1	0.00944465
1985	2	47650263	Intron 6-7	G	A	rs866308546	2657	1	0.0376364
1986	2	47650271	Intron 6-7	G	A	rs946798769	10588	1	0.00944465
1987	2	47650274	Intron 6-7	C	T	-	10588	1	0.00944465
1988	2	47650275	Intron 6-7	T	C	-	10588	1	0.00944465
1989	2	47650289	Intron 6-7	G	C	rs145009131	13335	139.5	1.04612
1990	2	47650295	Intron 6-7	A	C	-	10588	1	0.00944465
1991	2	47650300	Intron 6-7	C	T	-	10588	1	0.00944465
1992	2	47650301	Intron 6-7	G	A	rs1049210221	10588	1	0.00944465
1993	2	47650309	Intron 6-7	C	T	-	10588	1	0.00944465
1994	2	47650313	Intron 6-7	C	T	-	10588	1	0.00944465
1995	2	47650325	Intron 6-7	C	T	-	13245	5.5	0.0415251
1996	2	47650328	Intron 6-7	C	T	-	13245	2	0.0151
1997	2	47650330	Intron 6-7	C	T	-	10588	1	0.00944465
1998	2	47650331	Intron 6-7	C	T	-	2657	1	0.0376364
[truncated: 6,631 more rows]

## Sheet: MSH6
Table S3C. Non-coding variants of MSH6 in general Chinese population
No.	Chr	Position	Mutation Type	Ref. (NM_000179.2)	Alt	dbSNP150	Case Number	Carrier Number	Carrier Rate (%)
1	2	48008226	UTR5	C	G	-	10588	1	0.00944465
2	2	48008231	UTR5	T	C	rs78731390	10588	2	0.0188893
3	2	48008239	UTR5	A	T	-	10588	1	0.00944465
4	2	48008284	UTR5	C	G	rs569260777	10588	9	0.0850019
5	2	48008290	UTR5	G	T	-	10588	1	0.00944465
6	2	48008338	UTR5	T	G	-	10588	1	0.00944465
7	2	48008352	UTR5	T	G	rs189088618	10588	1	0.00944465
8	2	48008373	UTR5	C	G	-	10588	1	0.00944465
9	2	48008388	UTR5	G	C	-	10588	1	0.00944465
10	2	48008457	UTR5	C	A	-	10588	1	0.00944465
11	2	48008461	UTR5	T	C	-	10588	1	0.00944465
12	2	48008464	UTR5	C	G	-	10588	1	0.00944465
13	2	48008472	UTR5	A	-	-	10588	1	0.00944465
14	2	48008487	UTR5	T	A	-	10588	1	0.00944465
15	2	48008494	UTR5	T	C	rs1042216591	10588	1	0.00944465
16	2	48008500	UTR5	C	T	rs190595931	10588	34.5	0.325841
17	2	48008526	UTR5	T	C	-	10588	1	0.00944465
18	2	48008553	UTR5	A	G	-	10588	1	0.00944465
19	2	48008574	UTR5	A	C	rs330792	10588	344.5	3.25368
20	2	48008601	UTR5	T	A	-	10588	1	0.00944465
21	2	48008653	UTR5	-	A	-	10588	1.5	0.014167
22	2	48008663	UTR5	C	A	-	10588	1	0.00944465
23	2	48008687	UTR5	G	A	rs59624704	10588	5	0.0472233
24	2	48008689	UTR5	C	T	-	10588	1	0.00944465
25	2	48008717	UTR5	C	A	-	10588	1.5	0.014167
26	2	48008743	UTR5	C	T	-	10588	1	0.00944465
27	2	48008754	UTR5	C	G	-	10587	1	0.00944555
28	2	48008755	UTR5	A	G	rs561726093	10587	218	2.05913
29	2	48008756	UTR5	G	A	-	10588	1	0.00944465
30	2	48008757	UTR5	T	G	-	10588	1	0.00944465
31	2	48008764	UTR5	G	T	rs529424238	10588	3	0.028334
32	2	48008789	UTR5	A	C	rs910626511	10588	3	0.028334
33	2	48008824	UTR5	T	C	-	10588	1	0.00944465
34	2	48008827	UTR5	A	C	-	10588	1	0.00944465
35	2	48008830	UTR5	G	A	-	10588	1	0.00944465
36	2	48008841	UTR5	G	A	-	10588	1	0.00944465
37	2	48008849	UTR5	C	T	-	10588	1.5	0.014167
38	2	48008849	UTR5	C	G	rs924526705	10588	1	0.00944465
39	2	48008850	UTR5	G	T	-	10588	1	0.00944465
40	2	48008853	UTR5	C	G	-	10588	1	0.00944465
41	2	48008897	UTR5	G	A	rs977994276	10587	1	0.00944555
42	2	48008905	UTR5	-	T	-	10588	1	0.00944465
43	2	48008930	UTR5	C	T	rs532549192	10588	1	0.00944465
44	2	48008975	UTR5	C	T	-	10588	1	0.00944465
45	2	48008979	UTR5	C	G	rs184269985	10588	1	0.00944465
46	2	48008993	UTR5	C	T	-	10588	4.5	0.0425009
47	2	48009002	UTR5	C	T	rs1054230354	10588	1	0.00944465
48	2	48009047	UTR5	A	C	-	10588	1	0.00944465
49	2	48009108	UTR5	A	G	rs199950832	10588	1.5	0.014167
50	2	48009132	UTR5	C	G	-	10588	4	0.0377786
51	2	48009138	UTR5	T	C	-	10588	1	0.00944465
52	2	48009144	UTR5	T	C	rs148616292	10588	2	0.0188893
53	2	48009180	UTR5	C	G	-	10588	2.5	0.0236116
54	2	48009184	UTR5	CTTT	-	-	10588	1	0.00944465
55	2	48009208	UTR5	C	T	-	10588	1	0.00944465
56	2	48009221	UTR5	T	C	-	10588	1	0.00944465
57	2	48009240	UTR5	G	A	rs536659561	10588	1	0.00944465
58	2	48009244	UTR5	T	C	rs1000211091	10588	1.5	0.014167
59	2	48009257	UTR5	G	A	-	10588	1	0.00944465
60	2	48009263	UTR5	T	G	-	10588	1	0.00944465
61	2	48009272	UTR5	T	C	-	10588	1	0.00944465
62	2	48009276	UTR5	-	C	-	10588	1	0.00944465
63	2	48009306	UTR5	C	A	rs764868796	10588	1	0.00944465
64	2	48009309	UTR5	C	T	-	10588	1	0.00944465
65	2	48009311	UTR5	C	T	-	10588	1	0.00944465
66	2	48009329	UTR5	G	A	-	10588	1	0.00944465
67	2	48009330	UTR5	G	T	-	10588	1	0.00944465
68	2	48009333	UTR5	C	T	rs938414501	10588	1	0.00944465
69	2	48009343	UTR5	C	A	-	10588	1	0.00944465
70	2	48009344	UTR5	G	A	-	10588	1	0.00944465
71	2	48009359	UTR5	G	T	-	10588	3	0.028334
72	2	48009360	UTR5	G	A	rs544385179	10588	7	0.0661126
73	2	48009395	UTR5	C	T	-	10588	2	0.0188893
74	2	48009396	UTR5	T	C	-	10588	1	0.00944465
75	2	48009435	UTR5	G	T	-	10588	1	0.00944465
76	2	48009436	UTR5	C	T	-	10588	1	0.00944465
77	2	48009451	UTR5	G	A	rs373304207	10588	34	0.321118
78	2	48009454	UTR5	C	T	-	10588	1	0.00944465
79	2	48009479	UTR5	C	T	-	10588	1	0.00944465
80	2	48009493	UTR5	T	A	rs142047915	10588	15	0.14167
81	2	48009493	UTR5	T	C	-	10588	1	0.00944465
82	2	48009501	UTR5	T	C	rs549388426	10588	1	0.00944465
83	2	48009505	UTR5	T	C	-	10588	1	0.00944465
84	2	48009509	UTR5	T	C	-	10588	1	0.00944465
85	2	48009512	UTR5	A	T	-	10588	1	0.00944465
86	2	48009529	UTR5	A	T	-	10588	1	0.00944465
87	2	48009552	UTR5	C	A	-	10588	1	0.00944465
88	2	48009606	UTR5	T	C	-	10588	1	0.00944465
89	2	48009607	UTR5	C	A	rs3136227	10588	74	0.698904
90	2	48009668	UTR5	G	C	-	10588	1	0.00944465
91	2	48009685	UTR5	T	A	-	10588	2	0.0188893
92	2	48009749	UTR5	C	G	rs368045500	10588	1	0.00944465
93	2	48009750	UTR5	T	G	-	10588	1.5	0.014167
94	2	48009752	UTR5	T	C	-	10588	1	0.00944465
95	2	48009756	UTR5	A	G	-	10588	2	0.0188893
96	2	48009757	UTR5	A	G	-	10588	1	0.00944465
97	2	48009769	UTR5	C	T	-	10588	1	0.00944465
98	2	48009791	UTR5	C	G	-	10588	1	0.00944465
99	2	48009816	UTR5	T	G	rs3136228	10588	39	0.368342
100	2	48009834	UTR5	C	A	-	10588	1	0.00944465
101	2	48009849	UTR5	C	G	-	10588	1	0.00944465
102	2	48009851	UTR5	C	A	-	10588	1	0.00944465
103	2	48009859	UTR5	C	T	-	10588	5	0.0472233
104	2	48009876	UTR5	C	G	-	10588	1	0.00944465
105	2	48009876	UTR5	C	T	-	10588	2.5	0.0236116
106	2	48009891	UTR5	G	A	-	10588	1	0.00944465
107	2	48009894	UTR5	G	A	-	10588	1	0.00944465
108	2	48009902	UTR5	G	C	-	10588	1	0.00944465
109	2	48009905	UTR5	C	T	-	10588	1	0.00944465
110	2	48009910	UTR5	C	A	-	10588	3.5	0.0330563
111	2	48009911	UTR5	G	A	-	10588	1	0.00944465
112	2	48009918	UTR5	C	G	-	10588	1	0.00944465
113	2	48009923	UTR5	C	A	-	10588	2	0.0188893
114	2	48009925	UTR5	G	A	rs3136229	10588	9.5	0.0897242
115	2	48009950	UTR5	C	T	rs34907539	10588	1.5	0.014167
116	2	48009960	UTR5	C	G	-	10588	1	0.00944465
117	2	48009964	UTR5	G	-	-	10588	3	0.028334
118	2	48009974	UTR5	C	T	-	10588	1	0.00944465
119	2	48009995	UTR5	G	A	-	10586	1	0.00944644
120	2	48009996	UTR5	C	A	-	10586	1	0.00944644
121	2	48010000	UTR5	C	A	-	10586	1	0.00944644
122	2	48010002	UTR5	C	G	-	10586	1	0.00944644
123	2	48010033	UTR5	G	A	-	10581	3.5	0.0330782
124	2	48010049	UTR5	T	G	-	10579	1	0.00945269
125	2	48010057	UTR5	G	A	-	10578	1	0.00945358
126	2	48010060	UTR5	G	A	rs1025455027	10576	1	0.00945537
127	2	48010082	UTR5	G	A	-	10545	1	0.00948317
128	2	48010084	UTR5	G	T	-	10541	1	0.00948677
129	2	48010085	UTR5	C	T	rs371260512	10536	17	0.161352
130	2	48010085	UTR5	C	A	rs371260512	10536	1	0.00949127
131	2	48010098	UTR5	G	A	rs923554482	10471	1	0.00955019
132	2	48010104	UTR5	G	A	rs933544676	10456	2	0.0191278
133	2	48010107	UTR5	G	A	-	10446	1	0.00957304
134	2	48010111	UTR5	C	G	rs551212403	10433	2.5	0.0239624
135	2	48010118	UTR5	G	A	-	10383	18.5	0.178176
136	2	48010118	UTR5	G	T	-	10383	1	0.00963113
137	2	48010122	UTR5	G	C	-	10384	3.5	0.0337057
138	2	48010154	UTR5	C	T	-	10289	1	0.00971912
139	2	48010160	UTR5	C	T	rs533561027	10255	1.5	0.014627
140	2	48010162	UTR5	G	A	-	10262	1	0.00974469
141	2	48010162	UTR5	G	T	-	10262	1.5	0.014617
142	2	48010167	UTR5	T	C	rs981416639	10251	1	0.00975515
143	2	48010170	UTR5	C	T	-	10235	1	0.0097704
144	2	48010173	UTR5	C	G	-	10226	4.5	0.0440055
145	2	48010176	UTR5	C	T	-	10234	1.5	0.014657
146	2	48010207	UTR5	C	T	-	10535	2.5	0.0237304
147	2	48010214	UTR5	C	T	rs41540312	10553	5.5	0.0521179
148	2	48010221	UTR5	G	A	-	10567	1	0.00946342
149	2	48010641	Intron 1-2	G	T	rs748241865	10585	1	0.00944733
150	2	48010654	Intron 1-2	C	G	rs55927047	13242	9.5	0.0717414
151	2	48010673	Intron 1-2	G	A	-	610	1	0.163934
152	2	48010688	Intron 1-2	C	T	-	13854	8	0.0577451
153	2	48010697	Intron 1-2	G	A	-	10587	1	0.00944555
154	2	48010717	Intron 1-2	G	-	-	2657	3	0.112909
155	2	48010723	Intron 1-2	G	A	rs553929240	10588	1	0.00944465
156	2	48010727	Intron 1-2	C	T	-	10588	1	0.00944465
157	2	48010733	Intron 1-2	C	G	-	10588	1	0.00944465
158	2	48010736	Intron 1-2	G	A	-	10588	3.5	0.0330563
159	2	48010739	Intron 1-2	C	T	-	10588	1	0.00944465
160	2	48010802	Intron 1-2	C	G	-	10588	1	0.00944465
161	2	48010823	Intron 1-2	A	G	-	10588	1	0.00944465
162	2	48010832	Intron 1-2	G	C	rs941356409	10588	9.5	0.0897242
163	2	48010833	Intron 1-2	G	A	-	10588	1	0.00944465
164	2	48010853	Intron 1-2	A	T	-	10588	1	0.00944465
165	2	48010857	Intron 1-2	G	T	-	2657	1	0.0376364
166	2	48010857	Intron 1-2	G	C	-	10588	1	0.00944465
167	2	48010872	Intron 1-2	C	T	rs3136230	13245	11.5	0.0868252
168	2	48010876	Intron 1-2	G	A	-	10588	1	0.00944465
169	2	48010896	Intron 1-2	G	C	-	10587	1	0.00944555
170	2	48010908	Intron 1-2	G	A	rs374315703	13241	42	0.317197
171	2	48010911	Intron 1-2	C	T	rs869312601	10585	16	0.151157
172	2	48010928	Intron 1-2	T	G	-	10580	1	0.0094518
173	2	48010933	Intron 1-2	T	A	-	10578	4	0.0378143
174	2	48010940	Intron 1-2	G	A	rs367758161	13232	5	0.0377872
175	2	48010952	Intron 1-2	G	A	-	610	1	0.163934
176	2	48010954	Intron 1-2	GCTCC	-	-	13229	4	0.0302366
177	2	48010964	Intron 1-2	G	C	-	10551	1	0.00947777
178	2	48010975	Intron 1-2	C	T	-	2657	1	0.0376364
179	2	48010989	Intron 1-2	C	G	rs3136232	2657	2	0.0752729
180	2	48011021	Intron 1-2	C	G	rs3136233	12941	3200.5	24.7315
181	2	48011037	Intron 1-2	GGGGCGG	-	-	10288	1	0.00972006
182	2	48011042	Intron 1-2	-	G	-	12945	45.5	0.351487
183	2	48011042	Intron 1-2	G	-	-	12945	22	0.16995
184	2	48011058	Intron 1-2	G	A	rs3136235	13204	8.5	0.0643744
185	2	48011071	Intron 1-2	G	T	-	2657	1	0.0376364
186	2	48011079	Intron 1-2	G	C	-	10584	1	0.00944822
187	2	48011080	Intron 1-2	A	T	rs1003594574	2657	1	0.0376364
188	2	48011083	Intron 1-2	C	A	-	10586	1	0.00944644
189	2	48011085	Intron 1-2	G	T	-	10587	1	0.00944555
190	2	48011091	Intron 1-2	G	C	rs3136237	13244	20.5	0.154787
191	2	48011093	Intron 1-2	A	G	-	10587	1	0.00944555
192	2	48011096	Intron 1-2	G	A	-	10588	1	0.00944465
193	2	48011100	Intron 1-2	G	A	-	10588	1	0.00944465
194	2	48011110	Intron 1-2	G	C	rs531348092	13944	347.5	2.49211
195	2	48011112	Intron 1-2	T	G	rs367630365	13245	3	0.0226501
196	2	48011133	Intron 1-2	C	T	-	10588	2	0.0188893
197	2	48011150	Intron 1-2	G	C	-	10588	1	0.00944465
198	2	48011165	Intron 1-2	G	C	-	10588	1	0.00944465
199	2	48011179	Intron 1-2	A	G	-	10588	1	0.00944465
200	2	48011207	Intron 1-2	C	G	-	10588	1	0.00944465
201	2	48011215	Intron 1-2	C	T	rs903600519	10588	1	0.00944465
202	2	48011234	Intron 1-2	C	T	rs536034159	10588	1	0.00944465
203	2	48011237	Intron 1-2	C	G	-	10588	1	0.00944465
204	2	48011243	Intron 1-2	A	G	-	10588	1.5	0.014167
205	2	48011248	Intron 1-2	A	G	-	10588	1	0.00944465
206	2	48011257	Intron 1-2	C	T	-	2657	1	0.0376364
207	2	48011261	Intron 1-2	G	T	-	13245	5.5	0.0415251
208	2	48011261	Intron 1-2	G	C	rs777237892	10588	1	0.00944465
209	2	48011272	Intron 1-2	C	T	-	10588	1	0.00944465
210	2	48011278	Intron 1-2	G	T	-	10588	1.5	0.014167
211	2	48011285	Intron 1-2	-	G	rs1028862134	13245	8.5	0.0641752
212	2	48011307	Intron 1-2	G	T	-	10588	1.5	0.014167
213	2	48011311	Intron 1-2	G	T	-	13245	2	0.0151
214	2	48011314	Intron 1-2	G	T	-	2657	1	0.0376364
215	2	48011320	Intron 1-2	A	G	-	10588	1	0.00944465
216	2	48011332	Intron 1-2	C	A	-	10588	1.5	0.014167
217	2	48011348	Intron 1-2	C	A	rs913813140	13245	35.5	0.268026
218	2	48011349	Intron 1-2	G	C	-	10678	2	0.0187301
219	2	48011352	Intron 1-2	G	A	-	2657	1	0.0376364
220	2	48011356	Intron 1-2	T	G	-	10588	1	0.00944465
221	2	48011363	Intron 1-2	C	T	rs914006756	10588	1	0.00944465
222	2	48011377	Intron 1-2	G	C	-	10588	1	0.00944465
223	2	48011379	Intron 1-2	T	C	-	610	1	0.163934
224	2	48011403	Intron 1-2	A	G	-	10588	1	0.00944465
225	2	48011426	Intron 1-2	A	G	rs1055265683	10588	1.5	0.014167
226	2	48011455	Intron 1-2	T	C	-	2657	1	0.0376364
227	2	48011468	Intron 1-2	A	G	-	2657	1	0.0376364
228	2	48011488	Intron 1-2	G	T	-	610	1	0.163934
229	2	48011507	Intron 1-2	-	TAA	-	10588	1	0.00944465
230	2	48011516	Intron 1-2	C	T	rs1027362599	10588	1	0.00944465
231	2	48011519	Intron 1-2	G	C	-	10588	1	0.00944465
232	2	48011541	Intron 1-2	GTGA	-	-	2657	2	0.0752729
233	2	48011548	Intron 1-2	G	A	-	10588	1	0.00944465
234	2	48011549	Intron 1-2	A	T	-	10588	1	0.00944465
235	2	48011566	Intron 1-2	C	A	-	10588	1.5	0.014167
236	2	48011588	Intron 1-2	G	A	-	10588	1	0.00944465
237	2	48011588	Intron 1-2	G	C	-	10588	1	0.00944465
238	2	48011601	Intron 1-2	TT	-	-	597	1	0.167504
239	2	48011628	Intron 1-2	G	A	-	2657	1	0.0376364
240	2	48011645	Intron 1-2	A	G	rs114144926	13245	3	0.0226501
241	2	48011655	Intron 1-2	G	A	-	10588	1	0.00944465
242	2	48011675	Intron 1-2	C	A	-	10588	1	0.00944465
243	2	48011680	Intron 1-2	C	G	-	10588	1	0.00944465
244	2	48011705	Intron 1-2	G	C	-	10588	1	0.00944465
245	2	48011715	Intron 1-2	C	T	-	10588	1	0.00944465
246	2	48011725	Intron 1-2	C	T	-	10588	1	0.00944465
247	2	48011726	Intron 1-2	C	T	-	10588	2.5	0.0236116
248	2	48011745	Intron 1-2	G	T	-	10588	1	0.00944465
249	2	48011752	Intron 1-2	C	G	-	10588	1	0.00944465
250	2	48011760	Intron 1-2	C	G	-	10588	1	0.00944465
251	2	48011781	Intron 1-2	A	G	rs960957393	2657	2	0.0752729
252	2	48011810	Intron 1-2	A	C	-	10588	1	0.00944465
253	2	48011818	Intron 1-2	C	G	-	10588	1	0.00944465
254	2	48011861	Intron 1-2	A	G	-	10588	2	0.0188893
255	2	48011879	Intron 1-2	C	T	-	10588	1	0.00944465
256	2	48011889	Intron 1-2	C	T	rs949085844	10588	1	0.00944465
257	2	48011896	Intron 1-2	G	C	-	10588	1	0.00944465
258	2	48011899	Intron 1-2	C	G	-	10588	1	0.00944465
259	2	48011904	Intron 1-2	T	C	rs547694242	10588	1.5	0.014167
260	2	48011933	Intron 1-2	A	G	rs79195611	13945	2835.5	20.3335
261	2	48011955	Intron 1-2	T	G	rs113617847	10588	6	0.0566679
262	2	48011963	Intron 1-2	A	G	-	13245	4	0.0302001
263	2	48011988	Intron 1-2	AG	-	-	13245	2	0.0151
264	2	48011991	Intron 1-2	A	C	-	10588	1	0.00944465
265	2	48012000	Intron 1-2	C	G	rs117270463	13335	92	0.689914
266	2	48012014	Intron 1-2	A	G	rs907619706	10588	1.5	0.014167
267	2	48012021	Intron 1-2	A	C	-	10588	1	0.00944465
268	2	48012027	Intron 1-2	G	C	rs3136239	10588	5	0.0472233
269	2	48012044	Intron 1-2	C	T	-	10588	1	0.00944465
270	2	48012060	Intron 1-2	A	C	-	10588	1	0.00944465
271	2	48012073	Intron 1-2	C	T	-	13245	9.5	0.0717252
272	2	48012074	Intron 1-2	C	T	rs1042034328	10588	1	0.00944465
273	2	48012084	Intron 1-2	C	A	-	10588	1	0.00944465
274	2	48012086	Intron 1-2	C	T	rs3136240	13245	9.5	0.0717252
275	2	48012103	Intron 1-2	A	G	-	2657	1	0.0376364
276	2	48012110	Intron 1-2	C	A	-	10588	1	0.00944465
277	2	48012135	Intron 1-2	T	C	-	10588	1.5	0.014167
278	2	48012153	Intron 1-2	G	A	rs536093260	90	1	1.11111
279	2	48012154	Intron 1-2	G	T	-	2657	1	0.0376364
280	2	48012162	Intron 1-2	T	C	-	2657	1	0.0376364
281	2	48012163	Intron 1-2	A	G	rs796907013	10588	2	0.0188893
282	2	48012168	Intron 1-2	G	T	-	10588	1	0.00944465
283	2	48012189	Intron 1-2	C	G	rs576241148	13245	7	0.0528501
284	2	48012193	Intron 1-2	C	T	rs917693052	10588	1	0.00944465
285	2	48012208	Intron 1-2	G	C	-	10588	1	0.00944465
286	2	48012250	Intron 1-2	C	T	rs780225423	10588	1	0.00944465
287	2	48012281	Intron 1-2	A	G	-	10588	1	0.00944465
288	2	48012284	Intron 1-2	T	-	-	10588	1	0.00944465
289	2	48012294	Intron 1-2	C	G	-	10588	1	0.00944465
290	2	48012298	Intron 1-2	A	G	-	10588	1	0.00944465
291	2	48012309	Intron 1-2	C	G	-	13245	3	0.0226501
292	2	48012311	Intron 1-2	A	G	-	2657	1	0.0376364
293	2	48012322	Intron 1-2	G	A	rs183514150	10588	1	0.00944465
294	2	48012327	Intron 1-2	-	A	-	10588	1	0.00944465
295	2	48012375	Intron 1-2	G	C	rs3136241	13245	9.5	0.0717252
296	2	48012377	Intron 1-2	T	G	-	10588	1	0.00944465
297	2	48012400	Intron 1-2	T	G	-	10588	1	0.00944465
298	2	48012405	Intron 1-2	C	T	-	13245	5.5	0.0415251
299	2	48012406	Intron 1-2	G	T	rs113492636	10588	5	0.0472233
300	2	48012408	Intron 1-2	C	T	-	10588	1	0.00944465
301	2	48012412	Intron 1-2	G	T	-	10588	1.5	0.014167
302	2	48012435	Intron 1-2	C	T	-	10588	15.5	0.146392
303	2	48012436	Intron 1-2	G	A	-	2657	1	0.0376364
304	2	48012437	Intron 1-2	G	A	rs1004729250	10588	1	0.00944465
305	2	48012448	Intron 1-2	C	T	-	10588	1	0.00944465
306	2	48012454	Intron 1-2	C	T	-	10588	1	0.00944465
307	2	48012457	Intron 1-2	G	A	-	10588	1	0.00944465
308	2	48012457	Intron 1-2	G	T	-	10588	1	0.00944465
309	2	48012458	Intron 1-2	C	T	-	10588	1	0.00944465
310	2	48012474	Intron 1-2	C	G	-	13245	2	0.0151
311	2	48012508	Intron 1-2	G	T	rs533295122	13245	4	0.0302001
312	2	48012520	Intron 1-2	C	A	rs3136242	13245	7.5	0.0566251
313	2	48012521	Intron 1-2	-	CGGT	rs374794348	10588	1	0.00944465
314	2	48012526	Intron 1-2	C	G	-	10588	1	0.00944465
315	2	48012528	Intron 1-2	G	A	rs897309698	10588	1	0.00944465
316	2	48012533	Intron 1-2	T	-	-	13245	4	0.0302001
317	2	48012543	Intron 1-2	A	G	-	10588	1	0.00944465
318	2	48012575	Intron 1-2	T	G	-	10588	1	0.00944465
319	2	48012588	Intron 1-2	C	T	-	10588	1.5	0.014167
320	2	48012611	Intron 1-2	C	A	-	10588	1	0.00944465
321	2	48012618	Intron 1-2	A	C	-	2657	1	0.0376364
322	2	48012634	Intron 1-2	G	T	rs906464280	13245	4	0.0302001
323	2	48012642	Intron 1-2	C	T	rs959307369	2657	2	0.0752729
324	2	48012646	Intron 1-2	C	G	-	2657	1	0.0376364
325	2	48012656	Intron 1-2	C	T	rs3136243	10588	5.5	0.0519456
326	2	48012657	Intron 1-2	G	A	rs3136244	13245	4	0.0302001
327	2	48012673	Intron 1-2	G	T	-	10588	1	0.00944465
328	2	48012676	Intron 1-2	T	G	-	10588	1	0.00944465
329	2	48012692	Intron 1-2	C	T	-	10588	1	0.00944465
330	2	48012716	Intron 1-2	C	G	-	10588	1	0.00944465
331	2	48012727	Intron 1-2	C	A	-	10588	1	0.00944465
332	2	48012739	Intron 1-2	T	G	-	10588	1	0.00944465
333	2	48012764	Intron 1-2	G	A	-	10588	1	0.00944465
334	2	48012819	Intron 1-2	A	G	-	10588	1	0.00944465
335	2	48012837	Intron 1-2	G	A	-	10588	1	0.00944465
336	2	48012838	Intron 1-2	C	T	rs557617778	2657	1	0.0376364
337	2	48012846	Intron 1-2	C	T	rs3136245	14542	9033	62.1166
338	2	48012847	Intron 1-2	G	A	-	10588	1	0.00944465
339	2	48012847	Intron 1-2	G	T	-	10588	1	0.00944465
340	2	48012856	Intron 1-2	A	G	-	10588	1	0.00944465
341	2	48012858	Intron 1-2	C	G	-	10588	1	0.00944465
342	2	48012883	Intron 1-2	T	G	-	13245	5	0.0377501
343	2	48012899	Intron 1-2	G	T	rs1050240958	10588	2.5	0.0236116
344	2	48012916	Intron 1-2	C	G	-	10588	1	0.00944465
345	2	48012921	Intron 1-2	C	G	rs370391801	2657	1	0.0376364
346	2	48012925	Intron 1-2	G	-	-	13245	2	0.0151
347	2	48012953	Intron 1-2	T	C	-	10588	1	0.00944465
348	2	48012963	Intron 1-2	T	C	-	10588	1	0.00944465
349	2	48012988	Intron 1-2	T	A	-	10588	1	0.00944465
350	2	48012991	Intron 1-2	A	G	-	10588	2	0.0188893
351	2	48013023	Intron 1-2	C	T	-	2657	1	0.0376364
352	2	48013040	Intron 1-2	C	G	-	10588	1	0.00944465
353	2	48013053	Intron 1-2	G	T	-	10588	1	0.00944465
354	2	48013057	Intron 1-2	C	G	-	10588	1	0.00944465
355	2	48013087	Intron 1-2	-	A	-	10588	1	0.00944465
356	2	48013099	Intron 1-2	A	G	rs3136247	13245	9.5	0.0717252
357	2	48013111	Intron 1-2	G	T	-	13245	4	0.0302001
358	2	48013122	Intron 1-2	A	G	-	10588	1	0.00944465
359	2	48013136	Intron 1-2	A	C	rs1017986162	10588	1	0.00944465
360	2	48013155	Intron 1-2	C	G	-	10588	1	0.00944465
361	2	48013160	Intron 1-2	A	T	-	10588	1	0.00944465
362	2	48013180	Intron 1-2	A	G	-	610	1	0.163934
363	2	48013181	Intron 1-2	A	C	-	10588	1	0.00944465
364	2	48013184	Intron 1-2	A	G	-	10588	1	0.00944465
365	2	48013202	Intron 1-2	-	C	rs138450616	10588	5	0.0472233
366	2	48013215	Intron 1-2	G	T	-	13245	7	0.0528501
367	2	48013217	Intron 1-2	G	T	-	610	1	0.163934
368	2	48013221	Intron 1-2	G	C	-	10588	1	0.00944465
369	2	48013231	Intron 1-2	G	A	-	10588	1	0.00944465
370	2	48013237	Intron 1-2	G	C	rs910086659	10588	1	0.00944465
371	2	48013238	Intron 1-2	G	C	rs3136249	13245	9	0.0679502
372	2	48013239	Intron 1-2	C	T	-	10588	1.5	0.014167
373	2	48013261	Intron 1-2	C	T	rs1003672923	10588	2	0.0188893
374	2	48013268	Intron 1-2	A	G	-	2657	3	0.112909
375	2	48013279	Intron 1-2	T	A	-	10588	1	0.00944465
376	2	48013287	Intron 1-2	G	C	-	10588	1	0.00944465
377	2	48013289	Intron 1-2	C	T	-	10588	3	0.028334
378	2	48013295	Intron 1-2	A	T	-	13245	3	0.0226501
379	2	48013315	Intron 1-2	G	C	-	10588	1	0.00944465
380	2	48013319	Intron 1-2	A	G	-	10588	1	0.00944465
381	2	48013323	Intron 1-2	A	G	rs192803420	10588	1	0.00944465
382	2	48013347	Intron 1-2	T	C	-	10588	1	0.00944465
383	2	48013348	Intron 1-2	A	G	-	10588	1	0.00944465
384	2	48013358	Intron 1-2	G	A	-	90	1	1.11111
385	2	48013361	Intron 1-2	G	C	-	10588	2	0.0188893
386	2	48013386	Intron 1-2	G	A	-	13245	2	0.0151
387	2	48013421	Intron 1-2	A	G	rs951113538	10588	1	0.00944465
388	2	48013426	Intron 1-2	C	A	-	10588	1	0.00944465
389	2	48013449	Intron 1-2	A	G	-	10588	1	0.00944465
390	2	48013452	Intron 1-2	T	C	-	10588	1	0.00944465
391	2	48013473	Intron 1-2	C	T	-	10588	1	0.00944465
392	2	48013476	Intron 1-2	-	T	-	10588	1207	11.3997
393	2	48013476	Intron 1-2	T	-	-	10588	1014.5	9.5816
394	2	48013476	Intron 1-2	-	TT	-	10588	5.5	0.0519456
395	2	48013476	Intron 1-2	TT	-	-	10588	17.5	0.165281
396	2	48013476	Intron 1-2	TTT	-	-	10588	2	0.0188893
397	2	48013500	Intron 1-2	T	G	-	2657	2	0.0752729
398	2	48013526	Intron 1-2	T	G	-	10588	1	0.00944465
399	2	48013548	Intron 1-2	A	G	-	10588	1	0.00944465
400	2	48013560	Intron 1-2	G	A	-	10588	1	0.00944465
401	2	48013565	Intron 1-2	C	G	-	10588	1.5	0.014167
402	2	48013573	Intron 1-2	C	T	-	10588	2	0.0188893
403	2	48013584	Intron 1-2	C	T	-	10588	1	0.00944465
404	2	48013596	Intron 1-2	C	A	-	10588	1	0.00944465
405	2	48013612	Intron 1-2	T	G	-	10588	1	0.00944465
406	2	48013630	Intron 1-2	C	G	-	10588	1	0.00944465
407	2	48013634	Intron 1-2	C	T	-	10588	3.5	0.0330563
408	2	48013648	Intron 1-2	G	A	rs3136250	13245	21	0.15855
409	2	48013659	Intron 1-2	A	T	-	2657	2	0.0752729
410	2	48013662	Intron 1-2	-	G	rs397761779	11795	10601.5	89.8813
411	2	48013662	Intron 1-2	-	T	-	10588	1	0.00944465
412	2	48013671	Intron 1-2	C	T	rs3136251	13245	7.5	0.0566251
413	2	48013673	Intron 1-2	A	T	-	10588	1	0.00944465
414	2	48013681	Intron 1-2	C	T	-	10588	1	0.00944465
415	2	48013688	Intron 1-2	G	A	-	13245	9.5	0.0717252
416	2	48013704	Intron 1-2	C	T	-	10588	1	0.00944465
417	2	48013706	Intron 1-2	C	T	-	10588	1	0.00944465
418	2	48013709	Intron 1-2	G	A	-	10588	1	0.00944465
419	2	48013738	Intron 1-2	G	A	-	10588	1	0.00944465
420	2	48013752	Intron 1-2	C	T	rs6734214	10588	1	0.00944465
421	2	48013772	Intron 1-2	C	T	-	10588	1	0.00944465
422	2	48013773	Intron 1-2	G	T	-	13245	5.5	0.0415251
423	2	48013782	Intron 1-2	C	T	rs188515984	10588	1	0.00944465
424	2	48013792	Intron 1-2	C	T	rs75321559	13945	198.5	1.42345
425	2	48013830	Intron 1-2	G	A	rs955939562	10588	1	0.00944465
426	2	48013833	Intron 1-2	-	TGAAGTGTT	-	10588	1	0.00944465
427	2	48013837	Intron 1-2	A	G	rs914339568	10588	1	0.00944465
428	2	48013846	Intron 1-2	C	T	rs138031907	13245	6	0.0453001
429	2	48013858	Intron 1-2	-	T	rs149544395	13245	54.5	0.411476
430	2	48013858	Intron 1-2	T	-	-	10588	19.5	0.184171
431	2	48013870	Intron 1-2	C	G	-	10588	1	0.00944465
432	2	48013903	Intron 1-2	T	C	-	10588	1	0.00944465
433	2	48013905	Intron 1-2	T	G	-	10588	1	0.00944465
434	2	48013941	Intron 1-2	TTG	-	-	13245	5	0.0377501
435	2	48013953	Intron 1-2	G	T	-	10588	1	0.00944465
436	2	48013964	Intron 1-2	G	A	-	2657	2	0.0752729
437	2	48013983	Intron 1-2	C	T	rs901889045	10588	1	0.00944465
438	2	48013990	Intron 1-2	G	T	-	10588	2	0.0188893
439	2	48013997	Intron 1-2	A	G	rs976016444	10588	1	0.00944465
440	2	48014001	Intron 1-2	T	C	-	10588	1	0.00944465
441	2	48014016	Intron 1-2	C	G	-	10588	1	0.00944465
442	2	48014042	Intron 1-2	T	C	-	610	1	0.163934
443	2	48014060	Intron 1-2	C	G	-	10588	1	0.00944465
444	2	48014060	Intron 1-2	C	A	rs149254684	610	1	0.163934
445	2	48014082	Intron 1-2	A	G	-	10588	1	0.00944465
446	2	48014088	Intron 1-2	C	T	rs184783201	13335	20	0.149981
447	2	48014097	Intron 1-2	A	G	rs9679489	13245	3	0.0226501
448	2	48014106	Intron 1-2	T	G	-	10588	1	0.00944465
449	2	48014115	Intron 1-2	G	C	rs188021090	13245	11.5	0.0868252
450	2	48014125	Intron 1-2	TTTTA	-	-	10588	1	0.00944465
451	2	48014155	Intron 1-2	T	C	-	10588	1	0.00944465
452	2	48014187	Intron 1-2	G	T	-	10588	1.5	0.014167
453	2	48014192	Intron 1-2	C	T	rs1053503630	13245	8.5	0.0641752
454	2	48014213	Intron 1-2	C	G	-	10588	1	0.00944465
455	2	48014221	Intron 1-2	T	A	-	610	1	0.163934
456	2	48014224	Intron 1-2	G	A	-	10588	5	0.0472233
457	2	48014237	Intron 1-2	G	T	-	10588	1	0.00944465
458	2	48014254	Intron 1-2	C	T	-	10588	1	0.00944465
459	2	48014255	Intron 1-2	C	G	-	2657	1	0.0376364
460	2	48014297	Intron 1-2	G	A	rs952400287	10588	1	0.00944465
461	2	48014303	Intron 1-2	C	T	rs915679876	13245	2	0.0151
462	2	48014323	Intron 1-2	G	C	-	10588	1	0.00944465
463	2	48014332	Intron 1-2	T	-	-	10588	1	0.00944465
464	2	48014343	Intron 1-2	G	T	-	10588	1	0.00944465
465	2	48014359	Intron 1-2	T	C	-	13245	4	0.0302001
466	2	48014359	Intron 1-2	T	A	rs923375017	10588	5	0.0472233
467	2	48014377	Intron 1-2	A	G	rs562168907	13245	36	0.271801
468	2	48014393	Intron 1-2	C	T	-	2657	1	0.0376364
469	2	48014421	Intron 1-2	CT	-	-	10588	5.5	0.0519456
470	2	48014437	Intron 1-2	AAAATA	-	-	10588	1	0.00944465
471	2	48014451	Intron 1-2	G	A	-	2657	1	0.0376364
472	2	48014455	Intron 1-2	A	C	-	10588	1	0.00944465
473	2	48014505	Intron 1-2	T	C	rs1035500111	10588	3	0.028334
474	2	48014508	Intron 1-2	G	T	-	10588	1	0.00944465
475	2	48014533	Intron 1-2	G	T	rs1025386655	10588	1	0.00944465
476	2	48014543	Intron 1-2	C	T	rs141068016	13245	6	0.0453001
477	2	48014550	Intron 1-2	C	A	-	10588	1	0.00944465
478	2	48014563	Intron 1-2	T	C	-	10588	1	0.00944465
479	2	48014567	Intron 1-2	G	A	rs964905990	10588	1	0.00944465
480	2	48014572	Intron 1-2	T	A	-	13245	3.5	0.0264251
481	2	48014584	Intron 1-2	C	T	-	10588	1	0.00944465
482	2	48014589	Intron 1-2	C	G	rs144929198	13245	5	0.0377501
483	2	48014590	Intron 1-2	T	G	rs535163563	13245	42	0.317101
484	2	48014610	Intron 1-2	C	G	-	2657	4	0.150546
485	2	48014655	Intron 1-2	C	T	-	2657	1	0.0376364
486	2	48014657	Intron 1-2	C	A	rs913275720	10588	1	0.00944465
487	2	48014658	Intron 1-2	C	T	rs1053177249	10588	1	0.00944465
488	2	48014664	Intron 1-2	A	T	-	10588	1	0.00944465
489	2	48014672	Intron 1-2	C	T	-	10588	1	0.00944465
490	2	48014705	Intron 1-2	G	A	-	2657	1	0.0376364
491	2	48014716	Intron 1-2	A	G	-	10588	1	0.00944465
492	2	48014720	Intron 1-2	G	T	-	10588	1	0.00944465
493	2	48014742	Intron 1-2	T	A	-	2657	1	0.0376364
494	2	48014768	Intron 1-2	A	G	rs574217652	2657	1	0.0376364
495	2	48014771	Intron 1-2	G	A	-	10588	2.5	0.0236116
496	2	48014797	Intron 1-2	C	T	rs955047660	10678	2	0.0187301
497	2	48014805	Intron 1-2	G	C	-	13245	2.5	0.018875
498	2	48014807	Intron 1-2	A	G	rs934379352	10588	1	0.00944465
499	2	48014820	Intron 1-2	A	C	-	10588	6	0.0566679
500	2	48014841	Intron 1-2	G	A	rs914205713	13245	2	0.0151
501	2	48014842	Intron 1-2	A	C	-	13245	9	0.0679502
502	2	48014846	Intron 1-2	A	G	rs879542555	2657	1	0.0376364
503	2	48014849	Intron 1-2	C	T	rs529087787	10588	1.5	0.014167
504	2	48014850	Intron 1-2	G	T	-	10588	1	0.00944465
505	2	48014861	Intron 1-2	T	C	-	10588	1	0.00944465
506	2	48014870	Intron 1-2	C	T	rs1052340112	10588	1	0.00944465
507	2	48014879	Intron 1-2	C	T	-	10588	1	0.00944465
508	2	48014896	Intron 1-2	AA	-	-	2657	2	0.0752729
509	2	48014932	Intron 1-2	-	T	-	10588	1	0.00944465
510	2	48014951	Intron 1-2	G	A	-	10588	1	0.00944465
511	2	48014978	Intron 1-2	G	A	-	610	1	0.163934
512	2	48014991	Intron 1-2	C	G	rs3136256	2657	4	0.150546
513	2	48015036	Intron 1-2	C	T	-	13245	2	0.0151
514	2	48015042	Intron 1-2	T	G	-	2657	1	0.0376364
515	2	48015068	Intron 1-2	C	T	rs1020475814	10588	1	0.00944465
516	2	48015069	Intron 1-2	G	A	rs368294625	13245	15.5	0.117025
517	2	48015069	Intron 1-2	G	T	rs368294625	2657	1	0.0376364
518	2	48015074	Intron 1-2	A	T	-	10588	1	0.00944465
519	2	48015079	Intron 1-2	C	T	-	10588	1	0.00944465
520	2	48015081	Intron 1-2	C	A	-	10588	1	0.00944465
521	2	48015109	Intron 1-2	G	T	-	10588	1	0.00944465
522	2	48015128	Intron 1-2	A	G	-	10588	1	0.00944465
523	2	48015148	Intron 1-2	C	T	-	10588	1	0.00944465
524	2	48015167	Intron 1-2	T	A	-	13245	2.5	0.018875
525	2	48015169	Intron 1-2	G	C	rs3136257	13335	765	5.73678
526	2	48015174	Intron 1-2	A	G	-	10588	1	0.00944465
527	2	48015175	Intron 1-2	T	C	-	10588	3	0.028334
528	2	48015199	Intron 1-2	C	T	-	10588	1	0.00944465
529	2	48015215	Intron 1-2	A	G	-	10588	1	0.00944465
530	2	48015229	Intron 1-2	T	-	-	10588	1	0.00944465
531	2	48015239	Intron 1-2	T	C	-	13245	4	0.0302001
532	2	48015277	Intron 1-2	A	C	-	10588	1	0.00944465
533	2	48015280	Intron 1-2	-	T	-	10588	1	0.00944465
534	2	48015282	Intron 1-2	T	G	-	10588	1	0.00944465
535	2	48015284	Intron 1-2	T	C	rs3136259	13245	2	0.0151
536	2	48015301	Intron 1-2	C	T	-	10588	1	0.00944465
537	2	48015327	Intron 1-2	A	G	rs3136260	10588	5.5	0.0519456
538	2	48015336	Intron 1-2	C	G	-	10588	1	0.00944465
539	2	48015340	Intron 1-2	G	C	-	10588	1	0.00944465
540	2	48015341	Intron 1-2	C	G	rs951448976	10588	1	0.00944465
541	2	48015346	Intron 1-2	T	G	rs375513256	13245	6	0.0453001
542	2	48015355	Intron 1-2	C	A	rs74613867	10588	5.5	0.0519456
543	2	48015389	Intron 1-2	T	C	rs987632720	2657	1	0.0376364
544	2	48015414	Intron 1-2	G	T	-	10585	1	0.00944733
545	2	48015424	Intron 1-2	C	T	rs186125448	10588	1	0.00944465
546	2	48015427	Intron 1-2	C	T	-	10588	1	0.00944465
547	2	48015430	Intron 1-2	G	A	-	10588	1	0.00944465
548	2	48015430	Intron 1-2	G	C	-	10588	1	0.00944465
549	2	48015456	Intron 1-2	C	T	-	10588	1	0.00944465
550	2	48015462	Intron 1-2	C	T	-	10588	1	0.00944465
551	2	48015466	Intron 1-2	T	G	-	10588	1.5	0.014167
552	2	48015482	Intron 1-2	C	T	-	10588	1.5	0.014167
553	2	48015500	Intron 1-2	CTC	-	-	10588	1	0.00944465
554	2	48015510	Intron 1-2	C	T	-	10588	1	0.00944465
555	2	48015511	Intron 1-2	A	G	rs554127224	10678	2	0.0187301
556	2	48015514	Intron 1-2	C	T	-	2657	1	0.0376364
557	2	48015514	Intron 1-2	C	G	-	10588	1	0.00944465
558	2	48015521	Intron 1-2	G	A	rs112432539	13245	4.5	0.0339751
559	2	48015525	Intron 1-2	C	T	-	13245	3.5	0.0264251
560	2	48015530	Intron 1-2	A	G	-	10588	1	0.00944465
561	2	48015534	Intron 1-2	C	T	-	10588	1	0.00944465
562	2	48015537	Intron 1-2	A	G	-	2657	67	2.52164
563	2	48015542	Intron 1-2	C	T	-	13245	66	0.498301
564	2	48015552	Intron 1-2	C	G	-	10588	1	0.00944465
565	2	48015566	Intron 1-2	A	G	-	10588	1	0.00944465
566	2	48015583	Intron 1-2	G	A	-	610	1	0.163934
567	2	48015584	Intron 1-2	G	A	-	10588	1	0.00944465
568	2	48015586	Intron 1-2	G	C	-	13245	23.5	0.177425
569	2	48015591	Intron 1-2	A	G	-	10588	1	0.00944465
570	2	48015599	Intron 1-2	G	T	-	610	1	0.163934
571	2	48015608	Intron 1-2	A	G	-	10588	1	0.00944465
572	2	48015613	Intron 1-2	C	T	-	10588	1	0.00944465
573	2	48015615	Intron 1-2	A	G	-	10588	1	0.00944465
574	2	48015617	Intron 1-2	C	A	-	10588	1	0.00944465
575	2	48015617	Intron 1-2	C	G	-	10588	2	0.0188893
576	2	48015624	Intron 1-2	C	T	-	10588	2	0.0188893
577	2	48015627	Intron 1-2	C	G	rs201674405	13335	151	1.13236
578	2	48015629	Intron 1-2	T	G	-	10588	1	0.00944465
579	2	48015635	Intron 1-2	A	C	-	10588	1	0.00944465
580	2	48015638	Intron 1-2	C	T	-	10588	1	0.00944465
581	2	48015658	Intron 1-2	-	T	-	10588	1	0.00944465
582	2	48015671	Intron 1-2	C	T	-	10588	1	0.00944465
583	2	48015672	Intron 1-2	G	A	-	10588	4	0.0377786
584	2	48015679	Intron 1-2	C	-	-	2657	1	0.0376364
585	2	48015682	Intron 1-2	G	A	-	10588	1	0.00944465
586	2	48015682	Intron 1-2	G	T	-	10588	1	0.00944465
587	2	48015690	Intron 1-2	CTTTTT	-	-	2657	1	0.0376364
588	2	48015698	Intron 1-2	T	C	rs188552949	2657	2	0.0752729
589	2	48015713	Intron 1-2	T	C	-	2657	6	0.225819
590	2	48015731	Intron 1-2	C	T	rs3136261	10588	34.5	0.325841
591	2	48015763	Intron 1-2	T	C	rs3136262	10588	16.5	0.155837
592	2	48015782	Intron 1-2	C	T	-	2657	2	0.0752729
593	2	48015790	Intron 1-2	C	T	-	2657	1	0.0376364
594	2	48015799	Intron 1-2	C	T	-	13245	14	0.1057
595	2	48015801	Intron 1-2	C	T	rs571690662	2657	2	0.0752729
596	2	48015801	Intron 1-2	C	G	-	10588	1.5	0.014167
597	2	48015818	Intron 1-2	C	T	-	10588	1	0.00944465
598	2	48015833	Intron 1-2	C	G	-	10588	1	0.00944465
599	2	48015840	Intron 1-2	C	T	-	10588	1	0.00944465
600	2	48015867	Intron 1-2	C	T	-	2657	1	0.0376364
601	2	48015875	Intron 1-2	A	G	-	13335	6	0.0449944
602	2	48015896	Intron 1-2	A	G	-	13245	2	0.0151
603	2	48015910	Intron 1-2	C	T	rs554846559	10588	3	0.028334
604	2	48015911	Intron 1-2	A	G	-	10588	1	0.00944465
605	2	48015917	Intron 1-2	G	T	-	10588	1	0.00944465
606	2	48015918	Intron 1-2	C	T	-	10588	1	0.00944465
607	2	48015925	Intron 1-2	G	T	-	13245	3.5	0.0264251
608	2	48015929	Intron 1-2	T	G	-	10588	1	0.00944465
609	2	48015939	Intron 1-2	G	C	-	10588	2.5	0.0236116
610	2	48015942	Intron 1-2	C	T	rs543652183	90	1	1.11111
611	2	48015962	Intron 1-2	C	A	-	13245	9	0.0679502
612	2	48015963	Intron 1-2	G	A	-	10588	1	0.00944465
613	2	48015973	Intron 1-2	A	C	-	10588	1	0.00944465
614	2	48015978	Intron 1-2	T	A	-	10678	2	0.0187301
615	2	48015999	Intron 1-2	C	T	-	10588	1	0.00944465
616	2	48016006	Intron 1-2	C	T	-	10588	1	0.00944465
617	2	48016006	Intron 1-2	C	A	-	10588	1	0.00944465
618	2	48016020	Intron 1-2	G	A	-	10588	1	0.00944465
619	2	48016023	Intron 1-2	TTTC	-	-	2657	1	0.0376364
620	2	48016031	Intron 1-2	C	T	-	90	1	1.11111
621	2	48016035	Intron 1-2	T	-	-	9916	7.5	0.0756353
622	2	48016039	Intron 1-2	-	T	-	2657	1	0.0376364
623	2	48016045	Intron 1-2	CTTTTTTTTTTTTTTG	-	-	2657	1	0.0376364
624	2	48016045	Intron 1-2	CTTTTTTTTTTTTTTGTTTTTT	-	-	2657	3	0.112909
625	2	48016046	Intron 1-2	C	T	rs13035849	610	1	0.163934
626	2	48016061	Intron 1-2	G	T	rs145044092	610	1	0.163934
627	2	48016123	Intron 1-2	G	C	-	10588	1	0.00944465
628	2	48016125	Intron 1-2	C	G	-	13245	2	0.0151
629	2	48016125	Intron 1-2	C	T	rs34909856	13335	52	0.389951
630	2	48016126	Intron 1-2	G	A	rs3136264	13335	515	3.86202
631	2	48016126	Intron 1-2	G	T	-	10588	1	0.00944465
632	2	48016128	Intron 1-2	T	C	-	10587	1	0.00944555
633	2	48016146	Intron 1-2	C	T	-	10588	3	0.028334
634	2	48016147	Intron 1-2	C	T	rs548951725	10588	1	0.00944465
635	2	48016157	Intron 1-2	C	G	rs3136265	13944	3770	27.0367
636	2	48016163	Intron 1-2	C	G	-	10588	1	0.00944465
637	2	48016186	Intron 1-2	T	C	-	10588	1	0.00944465
638	2	48016204	Intron 1-2	A	G	-	13245	7.5	0.0566251
639	2	48016210	Intron 1-2	C	G	rs868695087	10588	1	0.00944465
640	2	48016213	Intron 1-2	T	C	-	10588	1	0.00944465
641	2	48016217	Intron 1-2	A	T	-	10588	1	0.00944465
642	2	48016243	Intron 1-2	T	A	-	10588	2	0.0188893
643	2	48016253	Intron 1-2	C	T	-	10588	1	0.00944465
644	2	48016277	Intron 1-2	C	G	rs376720494	10588	1	0.00944465
645	2	48016290	Intron 1-2	C	T	-	10588	1	0.00944465
646	2	48016293	Intron 1-2	G	A	-	2657	1	0.0376364
647	2	48016299	Intron 1-2	G	A	-	10588	1	0.00944465
648	2	48016303	Intron 1-2	T	C	-	2657	1	0.0376364
649	2	48016311	Intron 1-2	C	T	-	13245	2	0.0151
650	2	48016314	Intron 1-2	T	C	rs3136267	13245	32	0.241601
651	2	48016321	Intron 1-2	C	G	-	10588	1	0.00944465
652	2	48016323	Intron 1-2	A	G	-	10588	1	0.00944465
653	2	48016331	Intron 1-2	G	T	-	2657	1	0.0376364
654	2	48016332	Intron 1-2	G	A	-	10588	1	0.00944465
655	2	48016335	Intron 1-2	T	C	-	10588	1	0.00944465
656	2	48016339	Intron 1-2	A	G	-	10588	1	0.00944465
657	2	48016342	Intron 1-2	C	A	-	10588	1	0.00944465
658	2	48016344	Intron 1-2	T	C	rs554531600	10588	2	0.0188893
659	2	48016352	Intron 1-2	C	T	-	13245	3	0.0226501
660	2	48016353	Intron 1-2	G	A	rs3136269	13245	8.5	0.0641752
661	2	48016366	Intron 1-2	CTG	-	-	10588	1	0.00944465
662	2	48016372	Intron 1-2	A	G	rs138073253	10588	1	0.00944465
663	2	48016394	Intron 1-2	A	G	-	10588	1	0.00944465
664	2	48016418	Intron 1-2	T	C	-	10588	1	0.00944465
665	2	48016428	Intron 1-2	A	T	rs1050711774	13245	2	0.0151
666	2	48016461	Intron 1-2	-	T	-	13855	18.5	0.133526
667	2	48016461	Intron 1-2	G	T	-	2657	1	0.0376364
668	2	48016467	Intron 1-2	A	G	rs112715383	2657	1	0.0376364
669	2	48016468	Intron 1-2	G	-	-	10588	2	0.0188893
670	2	48016471	Intron 1-2	T	G	-	11198	2	0.0178603
671	2	48016527	Intron 1-2	G	A	-	10588	1	0.00944465
672	2	48016537	Intron 1-2	T	C	-	11198	4	0.0357207
673	2	48016541	Intron 1-2	A	C	rs756829055	10588	2.5	0.0236116
674	2	48016549	Intron 1-2	T	G	-	10588	1	0.00944465
675	2	48016551	Intron 1-2	T	C	rs750119398	10588	1.5	0.014167
676	2	48016589	Intron 1-2	A	T	-	13245	3	0.0226501
677	2	48016596	Intron 1-2	G	C	-	10588	1	0.00944465
678	2	48016598	Intron 1-2	ATT	-	-	10588	1	0.00944465
679	2	48016601	Intron 1-2	A	-	-	10588	1.5	0.014167
680	2	48016603	Intron 1-2	T	C	-	2657	1	0.0376364
681	2	48016615	Intron 1-2	C	G	-	10588	1	0.00944465
682	2	48016673	Intron 1-2	C	T	rs945097777	10588	1	0.00944465
683	2	48016687	Intron 1-2	A	G	-	10588	1	0.00944465
684	2	48016704	Intron 1-2	C	T	rs531665796	10588	1	0.00944465
685	2	48016707	Intron 1-2	A	G	rs372948645	2657	1	0.0376364
686	2	48016713	Intron 1-2	A	G	rs747353873	13245	5.5	0.0415251
687	2	48016739	Intron 1-2	A	G	-	10588	1	0.00944465
688	2	48016776	Intron 1-2	G	T	-	10588	1	0.00944465
689	2	48016796	Intron 1-2	T	-	-	10588	1	0.00944465
690	2	48016828	Intron 1-2	C	G	rs547270191	13245	2	0.0151
691	2	48016830	Intron 1-2	C	T	-	10588	2	0.0188893
692	2	48016845	Intron 1-2	A	G	rs780872882	10588	1.5	0.014167
693	2	48016854	Intron 1-2	A	-	-	10588	1	0.00944465
694	2	48016863	Intron 1-2	C	T	rs1008081738	10588	1	0.00944465
695	2	48016867	Intron 1-2	T	C	rs3136270	13335	240.5	1.80352
696	2	48016870	Intron 1-2	T	C	-	10588	1	0.00944465
697	2	48016871	Intron 1-2	C	T	-	10588	1	0.00944465
698	2	48016880	Intron 1-2	T	C	rs3136271	10588	1	0.00944465
699	2	48016895	Intron 1-2	C	T	-	10588	1	0.00944465
700	2	48016896	Intron 1-2	G	T	rs3136272	13245	31.5	0.237826
701	2	48016898	Intron 1-2	A	G	-	10588	3.5	0.0330563
702	2	48016907	Intron 1-2	A	T	-	13245	3.5	0.0264251
703	2	48016915	Intron 1-2	G	T	-	10588	1	0.00944465
704	2	48016946	Intron 1-2	T	-	-	10588	2.5	0.0236116
705	2	48016950	Intron 1-2	T	G	-	10588	1	0.00944465
706	2	48016958	Intron 1-2	G	A	-	610	1	0.163934
707	2	48016960	Intron 1-2	-	T	rs926326425	2657	1	0.0376364
708	2	48016960	Intron 1-2	T	-	-	13245	5	0.0377501
709	2	48016970	Intron 1-2	-	T	rs199879971	2657	9	0.338728
710	2	48016984	Intron 1-2	AG	-	-	10588	1	0.00944465
711	2	48016995	Intron 1-2	T	C	-	10588	1	0.00944465
712	2	48017021	Intron 1-2	C	T	-	10588	2	0.0188893
713	2	48017022	Intron 1-2	A	C	-	10588	1	0.00944465
714	2	48017025	Intron 1-2	G	T	-	13245	2	0.0151
715	2	48017025	Intron 1-2	G	A	-	10588	1	0.00944465
716	2	48017042	Intron 1-2	C	T	-	10588	1	0.00944465
717	2	48017046	Intron 1-2	-	A	-	10588	1	0.00944465
718	2	48017049	Intron 1-2	C	T	rs184855092	13335	12.5	0.0937383
719	2	48017052	Intron 1-2	C	T	rs3136274	13245	7.5	0.0566251
720	2	48017052	Intron 1-2	C	G	-	10588	3.5	0.0330563
721	2	48017062	Intron 1-2	A	G	rs376097784	13245	4.5	0.0339751
722	2	48017063	Intron 1-2	G	A	rs188928749	13245	6	0.0453001
723	2	48017067	Intron 1-2	T	A	rs374293348	13245	19	0.14345
724	2	48017075	Intron 1-2	C	T	rs567146499	13335	96.5	0.72366
725	2	48017089	Intron 1-2	G	A	-	10588	1	0.00944465
726	2	48017092	Intron 1-2	G	C	-	10588	1	0.00944465
727	2	48017099	Intron 1-2	C	T	-	10588	1	0.00944465
728	2	48017110	Intron 1-2	A	-	-	10588	1	0.00944465
729	2	48017168	Intron 1-2	C	G	-	10588	1	0.00944465
730	2	48017183	Intron 1-2	C	T	-	10588	1	0.00944465
731	2	48017191	Intron 1-2	G	A	-	10588	1	0.00944465
732	2	48017216	Intron 1-2	A	C	rs559097001	90	1	1.11111
733	2	48017241	Intron 1-2	C	T	-	10588	1	0.00944465
734	2	48017252	Intron 1-2	A	C	-	10588	1	0.00944465
735	2	48017261	Intron 1-2	G	A	-	10588	1	0.00944465
736	2	48017269	Intron 1-2	T	C	rs181613665	13245	2	0.0151
737	2	48017286	Intron 1-2	C	T	rs752699293	10588	1	0.00944465
738	2	48017288	Intron 1-2	C	T	-	10588	1.5	0.014167
739	2	48017299	Intron 1-2	G	A	rs368690010	13245	8	0.0604002
740	2	48017310	Intron 1-2	C	G	rs569776659	13245	8	0.0604002
741	2	48017322	Intron 1-2	A	G	-	13245	2	0.0151
742	2	48017332	Intron 1-2	G	C	-	2657	1	0.0376364
743	2	48017332	Intron 1-2	G	T	rs186283508	10588	1	0.00944465
744	2	48017351	Intron 1-2	A	G	rs983105147	10588	1	0.00944465
745	2	48017366	Intron 1-2	G	T	-	10588	1	0.00944465
746	2	48017387	Intron 1-2	C	A	rs1006070520	10588	1	0.00944465
747	2	48017440	Intron 1-2	G	A	rs552287734	13245	2	0.0151
748	2	48017458	Intron 1-2	G	C	-	10588	1	0.00944465
749	2	48017472	Intron 1-2	A	G	rs139467158	10588	1	0.00944465
750	2	48017477	Intron 1-2	C	T	-	10588	1	0.00944465
751	2	48017478	Intron 1-2	G	A	rs985990909	10588	1	0.00944465
752	2	48017486	Intron 1-2	C	T	rs756447776	10588	1	0.00944465
753	2	48017501	Intron 1-2	C	T	rs553631780	2657	1	0.0376364
754	2	48017507	Intron 1-2	C	T	rs897199091	10588	1	0.00944465
755	2	48017528	Intron 1-2	C	-	-	610	1	0.163934
756	2	48017530	Intron 1-2	G	A	-	10588	1	0.00944465
757	2	48017559	Intron 1-2	T	A	rs3136276	13245	4	0.0302001
758	2	48017562	Intron 1-2	G	A	-	10588	1	0.00944465
759	2	48017574	Intron 1-2	A	G	-	10588	1	0.00944465
760	2	48017596	Intron 1-2	A	G	-	10588	1	0.00944465
761	2	48017608	Intron 1-2	G	A	-	2657	1	0.0376364
762	2	48017615	Intron 1-2	T	A	-	10588	1	0.00944465
763	2	48017622	Intron 1-2	T	C	rs974301631	13245	4	0.0302001
764	2	48017650	Intron 1-2	T	C	-	10588	1	0.00944465
765	2	48017651	Intron 1-2	G	A	rs3136277	10588	4.5	0.0425009
766	2	48017669	Intron 1-2	A	G	rs3136278	13245	4	0.0302001
767	2	48017680	Intron 1-2	AGTT	-	-	10588	3.5	0.0330563
768	2	48017703	Intron 1-2	G	A	-	13245	5	0.0377501
769	2	48017705	Intron 1-2	A	G	-	10588	1	0.00944465
770	2	48017728	Intron 1-2	A	C	-	10588	1	0.00944465
771	2	48017750	Intron 1-2	G	A	-	10588	1	0.00944465
772	2	48017757	Intron 1-2	C	T	-	13245	2	0.0151
773	2	48017763	Intron 1-2	T	A	-	10588	1	0.00944465
774	2	48017768	Intron 1-2	C	A	rs3136279	13245	8.5	0.0641752
775	2	48017773	Intron 1-2	C	T	-	10588	1	0.00944465
776	2	48017778	Intron 1-2	G	A	rs552577755	2657	1	0.0376364
777	2	48017778	Intron 1-2	G	C	rs552577755	10588	1	0.00944465
778	2	48017779	Intron 1-2	C	T	-	10588	1	0.00944465
779	2	48017794	Intron 1-2	C	G	-	10588	2	0.0188893
780	2	48017817	Intron 1-2	TC	-	-	13245	519	3.91846
781	2	48017818	Intron 1-2	TC	-	rs149178357	610	2	0.327869
782	2	48017824	Intron 1-2	A	G	-	10588	1	0.00944465
783	2	48017835	Intron 1-2	C	G	-	10588	5.5	0.0519456
784	2	48017839	Intron 1-2	A	T	rs898836039	10588	16.5	0.155837
785	2	48017840	Intron 1-2	A	T	-	10588	1	0.00944465
786	2	48017844	Intron 1-2	ATAACT	-	-	10588	1	0.00944465
787	2	48017845	Intron 1-2	A	G	-	10588	1	0.00944465
788	2	48017845	Intron 1-2	A	C	rs3136280	10588	1	0.00944465
789	2	48017849	Intron 1-2	TA	-	-	2657	1	0.0376364
790	2	48017851	Intron 1-2	A	G	rs937343884	13244	3	0.0226518
791	2	48017860	Intron 1-2	T	C	-	10588	1	0.00944465
792	2	48017872	Intron 1-2	G	A	-	10588	1	0.00944465
793	2	48017918	Intron 1-2	C	G	rs375269648	13245	28	0.211401
794	2	48017938	Intron 1-2	ATT	-	-	10588	1	0.00944465
795	2	48017958	Intron 1-2	G	T	rs3732184	10588	2	0.0188893
796	2	48017959	Intron 1-2	C	T	rs3732185	10588	2	0.0188893
797	2	48017964	Intron 1-2	A	G	rs190868714	13855	8	0.0577409
798	2	48017975	Intron 1-2	A	G	-	10588	1	0.00944465
799	2	48018006	Intron 1-2	C	T	-	13855	6.5	0.0469145
800	2	48018012	Intron 1-2	T	A	rs557578923	10588	1	0.00944465
801	2	48018030	Intron 1-2	A	G	rs1800931	13945	418.5	3.00108
802	2	48018053	Intron 1-2	C	A	-	2657	1	0.0376364
803	2	48018053	Intron 1-2	C	T	-	13245	2	0.0151
804	2	48018270	Intron 2-3	T	G	-	10588	1	0.00944465
805	2	48018275	Intron 2-3	A	G	rs1800933	10588	2.5	0.0236116
806	2	48018293	Intron 2-3	-	TG	rs374618432	3267	28	0.857055
807	2	48018293	Intron 2-3	-	TGTGTGTG	rs745513030	2657	2	0.0752729
808	2	48018293	Intron 2-3	TG	-	-	2657	7	0.263455
809	2	48018293	Intron 2-3	TGTGTGTG	-	-	2657	3	0.112909
810	2	48018293	Intron 2-3	TGTGTGTGTG	-	-	2657	1	0.0376364
811	2	48018294	Intron 2-3	TG	-	rs397839804	610	13	2.13115
812	2	48018294	Intron 2-3	TGTGTGTG	-	-	610	1	0.163934
813	2	48018314	Intron 2-3	T	A	rs3136282	2747	18	0.65526
814	2	48018314	Intron 2-3	-	GA	-	2657	2	0.0752729
815	2	48018319	Intron 2-3	AAAC	-	-	10588	1	0.00944465
816	2	48018321	Intron 2-3	ACAG	-	-	10588	4.5	0.0425009
817	2	48018328	Intron 2-3	A	G	-	10588	1	0.00944465
818	2	48018334	Intron 2-3	G	A	rs563127819	10588	1.5	0.014167
819	2	48018339	Intron 2-3	C	G	-	2657	1	0.0376364
820	2	48018348	Intron 2-3	A	G	rs564570497	10588	1	0.00944465
821	2	48018353	Intron 2-3	A	G	rs1050103733	10588	1	0.00944465
822	2	48018362	Intron 2-3	A	C	rs145343480	13245	6	0.0453001
823	2	48018398	Intron 2-3	G	A	-	13245	6	0.0453001
824	2	48018399	Intron 2-3	T	G	-	10588	1	0.00944465
825	2	48018400	Intron 2-3	T	C	-	2657	1	0.0376364
826	2	48018411	Intron 2-3	C	T	-	10588	1	0.00944465
827	2	48018415	Intron 2-3	C	T	-	10588	1	0.00944465
828	2	48018417	Intron 2-3	T	C	rs74793023	13245	2	0.0151
829	2	48018431	Intron 2-3	A	C	-	10588	1	0.00944465
830	2	48018437	Intron 2-3	G	T	-	10588	1	0.00944465
831	2	48018464	Intron 2-3	G	T	-	10588	1	0.00944465
832	2	48018467	Intron 2-3	TTT	-	-	10588	1	0.00944465
833	2	48018479	Intron 2-3	G	T	rs3136283	13245	8.5	0.0641752
834	2	48018489	Intron 2-3	T	A	-	10588	1	0.00944465
835	2	48018492	Intron 2-3	C	T	-	10588	1	0.00944465
836	2	48018507	Intron 2-3	T	C	-	10588	1.5	0.014167
837	2	48018535	Intron 2-3	C	G	rs971928452	10588	1	0.00944465
838	2	48018536	Intron 2-3	C	T	-	13245	5	0.0377501
839	2	48018543	Intron 2-3	TT	-	-	13245	6.5	0.0490751
840	2	48018563	Intron 2-3	G	C	-	2657	2	0.0752729
841	2	48018569	Intron 2-3	G	A	-	10588	1	0.00944465
842	2	48018598	Intron 2-3	G	A	rs190310309	13245	59	0.445451
843	2	48018625	Intron 2-3	C	T	rs1005807070	13245	8	0.0604002
844	2	48018633	Intron 2-3	C	G	-	10588	3.5	0.0330563
845	2	48018641	Intron 2-3	C	G	-	10588	1	0.00944465
846	2	48018650	Intron 2-3	C	T	-	10588	1	0.00944465
847	2	48018656	Intron 2-3	T	C	rs3136284	13245	8.5	0.0641752
848	2	48018662	Intron 2-3	C	T	-	10588	1	0.00944465
849	2	48018672	Intron 2-3	G	T	-	13245	2.5	0.018875
850	2	48018674	Intron 2-3	-	T	-	10588	1	0.00944465
851	2	48018687	Intron 2-3	C	T	-	13245	5	0.0377501
852	2	48018706	Intron 2-3	C	G	rs1003609518	10588	1.5	0.014167
853	2	48018744	Intron 2-3	C	T	rs1035446637	10588	1	0.00944465
854	2	48018775	Intron 2-3	GT	-	-	10588	1	0.00944465
855	2	48018785	Intron 2-3	A	G	-	10588	1	0.00944465
856	2	48018788	Intron 2-3	G	A	rs961986191	10588	1	0.00944465
857	2	48018789	Intron 2-3	T	C	-	13245	3	0.0226501
858	2	48018804	Intron 2-3	TCTT	-	-	10588	3.5	0.0330563
859	2	48018818	Intron 2-3	T	C	rs552542275	2657	1	0.0376364
860	2	48018842	Intron 2-3	G	C	-	13245	39	0.294451
861	2	48018852	Intron 2-3	C	G	-	2657	1	0.0376364
862	2	48018855	Intron 2-3	T	C	-	10588	1	0.00944465
863	2	48018857	Intron 2-3	G	A	rs894694092	10588	1	0.00944465
864	2	48018862	Intron 2-3	G	A	-	10588	1	0.00944465
865	2	48018863	Intron 2-3	G	C	-	10588	3	0.028334
866	2	48018871	Intron 2-3	G	A	-	2657	1	0.0376364
867	2	48018884	Intron 2-3	C	G	-	10588	1	0.00944465
868	2	48018896	Intron 2-3	C	T	-	10588	1	0.00944465
869	2	48018903	Intron 2-3	C	T	rs946893990	13245	29	0.218951
870	2	48018907	Intron 2-3	T	C	-	10588	1	0.00944465
871	2	48018910	Intron 2-3	T	G	-	10588	1	0.00944465
872	2	48018913	Intron 2-3	G	C	-	10588	1	0.00944465
873	2	48018936	Intron 2-3	C	T	-	13245	2	0.0151
874	2	48018939	Intron 2-3	C	G	-	13245	5	0.0377501
875	2	48018940	Intron 2-3	C	T	rs372642889	10588	1	0.00944465
876	2	48018941	Intron 2-3	G	T	-	10588	4	0.0377786
877	2	48018941	Intron 2-3	G	A	-	10588	1	0.00944465
878	2	48018946	Intron 2-3	G	C	-	10588	1	0.00944465
879	2	48018952	Intron 2-3	ATTAT	-	-	10588	1	0.00944465
880	2	48018964	Intron 2-3	A	G	-	2657	1	0.0376364
881	2	48018970	Intron 2-3	C	T	rs564469963	10588	1	0.00944465
882	2	48018980	Intron 2-3	-	TA	-	13245	8.5	0.0641752
883	2	48018992	Intron 2-3	-	T	-	2657	3	0.112909
884	2	48018992	Intron 2-3	A	T	rs182872731	2657	21	0.790365
885	2	48018993	Intron 2-3	-	A	rs200707649	2657	4	0.150546
886	2	48018994	Intron 2-3	T	A	rs10210340	3357	250	7.44713
887	2	48018996	Intron 2-3	T	A	rs118046692	2657	1	0.0376364
888	2	48018996	Intron 2-3	T	C	rs118046692	2747	149	5.4241
889	2	48018999	Intron 2-3	T	C	-	2657	1	0.0376364
890	2	48019005	Intron 2-3	G	C	-	13245	7.5	0.0566251
891	2	48019007	Intron 2-3	C	T	rs1007452505	10588	3.5	0.0330563
892	2	48019027	Intron 2-3	C	T	-	10588	1	0.00944465
893	2	48019042	Intron 2-3	A	G	rs187510121	10588	1	0.00944465
894	2	48019047	Intron 2-3	G	A	rs3136286	13245	8	0.0604002
895	2	48019050	Intron 2-3	A	G	rs989799060	90	1	1.11111
896	2	48019056	Intron 2-3	G	T	-	10588	1	0.00944465
897	2	48019061	Intron 2-3	C	T	-	10588	1	0.00944465
898	2	48019074	Intron 2-3	C	T	rs1053150813	10588	1	0.00944465
899	2	48019084	Intron 2-3	C	T	-	10588	1	0.00944465
900	2	48019087	Intron 2-3	G	A	-	2657	1	0.0376364
901	2	48019106	Intron 2-3	C	T	-	10588	1.5	0.014167
902	2	48019119	Intron 2-3	G	A	-	10588	1	0.00944465
903	2	48019140	Intron 2-3	C	G	rs533367849	13245	11	0.0830502
904	2	48019146	Intron 2-3	C	A	-	10588	1	0.00944465
905	2	48019147	Intron 2-3	A	C	-	10588	1	0.00944465
906	2	48019151	Intron 2-3	A	G	-	10588	1	0.00944465
907	2	48019181	Intron 2-3	C	T	-	10588	4	0.0377786
908	2	48019184	Intron 2-3	C	T	rs1049069141	2657	2	0.0752729
909	2	48019190	Intron 2-3	G	T	rs887749457	10588	1	0.00944465
910	2	48019196	Intron 2-3	G	T	-	2657	1	0.0376364
911	2	48019209	Intron 2-3	T	C	-	10588	1	0.00944465
912	2	48019218	Intron 2-3	C	A	-	10588	1	0.00944465
913	2	48019242	Intron 2-3	-	CCAAAGTG	-	10588	1	0.00944465
914	2	48019255	Intron 2-3	G	C	-	10588	1.5	0.014167
915	2	48019285	Intron 2-3	G	A	rs893246360	10588	1	0.00944465
916	2	48019310	Intron 2-3	T	G	-	10588	1	0.00944465
917	2	48019316	Intron 2-3	C	T	rs969713557	13245	2	0.0151
918	2	48019317	Intron 2-3	G	A	rs535049538	13335	120	0.899888
919	2	48019320	Intron 2-3	G	T	-	10588	1	0.00944465
920	2	48019372	Intron 2-3	C	T	rs1049099807	13245	40.5	0.305776
921	2	48019372	Intron 2-3	C	A	-	10588	1	0.00944465
922	2	48019379	Intron 2-3	C	T	rs943380854	10588	2	0.0188893
923	2	48019387	Intron 2-3	C	T	-	13335	3	0.0224972
924	2	48019389	Intron 2-3	A	G	-	2657	1	0.0376364
925	2	48019396	Intron 2-3	C	G	rs575490754	10588	1	0.00944465
926	2	48019413	Intron 2-3	C	T	-	10588	1	0.00944465
927	2	48019414	Intron 2-3	G	A	rs3136288	13245	11	0.0830502
928	2	48019419	Intron 2-3	C	T	rs548733831	10588	1	0.00944465
929	2	48019420	Intron 2-3	G	C	-	13245	2	0.0151
930	2	48019436	Intron 2-3	A	T	-	2657	1	0.0376364
931	2	48019436	Intron 2-3	A	G	-	10588	1	0.00944465
932	2	48019438	Intron 2-3	C	G	-	10588	1	0.00944465
933	2	48019447	Intron 2-3	G	T	-	10588	1	0.00944465
934	2	48019466	Intron 2-3	A	G	rs1021383497	13245	17	0.12835
935	2	48019478	Intron 2-3	C	T	-	10588	1	0.00944465
936	2	48019484	Intron 2-3	TT	-	-	10588	1	0.00944465
937	2	48019485	Intron 2-3	T	C	rs2348244	14542	5909	40.634
938	2	48019495	Intron 2-3	G	C	-	10588	1	0.00944465
939	2	48019500	Intron 2-3	C	T	-	10588	1	0.00944465
940	2	48019522	Intron 2-3	G	A	-	13245	10.5	0.0792752
941	2	48019525	Intron 2-3	A	T	-	10588	1	0.00944465
942	2	48019558	Intron 2-3	G	T	-	13245	11	0.0830502
943	2	48019566	Intron 2-3	G	A	-	10588	1	0.00944465
944	2	48019594	Intron 2-3	C	T	-	10588	1	0.00944465
945	2	48019596	Intron 2-3	C	G	rs140536762	13945	227.5	1.63141
946	2	48019642	Intron 2-3	T	-	-	10588	1	0.00944465
947	2	48019650	Intron 2-3	T	C	-	10588	1	0.00944465
948	2	48019657	Intron 2-3	TTTT	-	-	10588	4.5	0.0425009
949	2	48019664	Intron 2-3	A	G	-	2657	1	0.0376364
950	2	48019681	Intron 2-3	G	A	-	10588	1	0.00944465
951	2	48019689	Intron 2-3	A	T	rs77248622	10588	2.5	0.0236116
952	2	48019691	Intron 2-3	G	A	-	10588	1	0.00944465
953	2	48019694	Intron 2-3	G	A	-	13245	11	0.0830502
954	2	48019694	Intron 2-3	G	T	rs3136289	14542	3770.5	25.9283
955	2	48019709	Intron 2-3	A	C	rs545308863	10588	4.5	0.0425009
956	2	48019713	Intron 2-3	T	C	-	10588	1	0.00944465
957	2	48019723	Intron 2-3	G	C	rs3136290	10588	5.5	0.0519456
958	2	48019740	Intron 2-3	A	G	-	10588	4.5	0.0425009
959	2	48019742	Intron 2-3	T	C	-	10588	1	0.00944465
960	2	48019744	Intron 2-3	C	T	-	13245	3	0.0226501
961	2	48019746	Intron 2-3	G	A	-	13245	7	0.0528501
962	2	48019754	Intron 2-3	A	G	-	90	1	1.11111
963	2	48019757	Intron 2-3	T	A	-	10588	1	0.00944465
964	2	48019786	Intron 2-3	C	T	-	10588	1.5	0.014167
965	2	48019796	Intron 2-3	C	T	rs1053059746	13245	2.5	0.018875
966	2	48019802	Intron 2-3	A	C	-	10588	1	0.00944465
967	2	48019813	Intron 2-3	T	G	-	10588	1	0.00944465
968	2	48019838	Intron 2-3	C	G	-	10588	1	0.00944465
969	2	48019855	Intron 2-3	G	T	-	10588	1	0.00944465
970	2	48019881	Intron 2-3	C	T	-	10588	1	0.00944465
971	2	48019886	Intron 2-3	G	A	-	10588	1	0.00944465
972	2	48019895	Intron 2-3	C	-	-	13245	2	0.0151
973	2	48019896	Intron 2-3	C	T	-	10588	1	0.00944465
974	2	48019897	Intron 2-3	C	A	-	10588	1	0.00944465
975	2	48019909	Intron 2-3	G	T	rs550540236	2657	2	0.0752729
976	2	48019917	Intron 2-3	CT	-	-	13245	47	0.354851
977	2	48019918	Intron 2-3	T	-	-	10588	2	0.0188893
978	2	48019985	Intron 2-3	TTTTTT	-	-	2657	1	0.0376364
979	2	48019985	Intron 2-3	TTTTTTTT	-	-	2657	2	0.0752729
980	2	48019986	Intron 2-3	T	-	rs11335797	597	1	0.167504
981	2	48020009	Intron 2-3	T	A	rs954723981	2657	21	0.790365
982	2	48020010	Intron 2-3	A	T	-	2657	3	0.112909
983	2	48020016	Intron 2-3	A	T	-	10588	1	0.00944465
984	2	48020020	Intron 2-3	C	T	rs988793517	10588	1	0.00944465
985	2	48020024	Intron 2-3	C	T	rs371772836	10588	1	0.00944465
986	2	48020028	Intron 2-3	C	G	-	10588	1	0.00944465
987	2	48020030	Intron 2-3	A	G	rs112943708	2657	1	0.0376364
988	2	48020043	Intron 2-3	G	A	-	10588	1	0.00944465
989	2	48020044	Intron 2-3	G	C	-	10588	1	0.00944465
990	2	48020049	Intron 2-3	C	G	-	10588	1	0.00944465
991	2	48020065	Intron 2-3	C	G	-	10588	1	0.00944465
992	2	48020075	Intron 2-3	T	C	-	10588	1	0.00944465
993	2	48020078	Intron 2-3	T	C	-	10588	1	0.00944465
994	2	48020079	Intron 2-3	G	C	-	13245	3.5	0.0264251
995	2	48020100	Intron 2-3	G	C	-	10588	1	0.00944465
996	2	48020113	Intron 2-3	A	G	-	10588	1	0.00944465
997	2	48020120	Intron 2-3	C	T	-	10588	1	0.00944465
998	2	48020131	Intron 2-3	A	G	rs1016927171	2657	1	0.0376364
999	2	48020134	Intron 2-3	C	G	-	10588	1	0.00944465
1000	2	48020163	Intron 2-3	T	C	rs1030441627	10588	1	0.00944465
1001	2	48020173	Intron 2-3	A	G	-	10588	1	0.00944465
1002	2	48020182	Intron 2-3	G	A	-	13245	5	0.0377501
1003	2	48020239	Intron 2-3	C	T	-	2657	1	0.0376364
1004	2	48020275	Intron 2-3	C	G	-	13245	3	0.0226501
1005	2	48020288	Intron 2-3	C	T	-	13245	11	0.0830502
1006	2	48020293	Intron 2-3	C	G	-	10588	1	0.00944465
1007	2	48020305	Intron 2-3	C	T	-	10588	1	0.00944465
1008	2	48020357	Intron 2-3	G	A	-	10588	1	0.00944465
1009	2	48020359	Intron 2-3	C	T	rs35689021	13245	6.5	0.0490751
1010	2	48020364	Intron 2-3	G	T	rs1046763227	10588	1	0.00944465
1011	2	48020373	Intron 2-3	T	A	-	10588	1	0.00944465
1012	2	48020374	Intron 2-3	C	T	rs866928258	10588	1	0.00944465
1013	2	48020375	Intron 2-3	G	A	rs941017550	10588	2	0.0188893
1014	2	48020382	Intron 2-3	T	C	rs3136292	13245	20	0.151
1015	2	48020422	Intron 2-3	C	T	rs1020377029	10588	1.5	0.014167
1016	2	48020428	Intron 2-3	C	G	-	10588	1	0.00944465
1017	2	48020437	Intron 2-3	G	C	-	10586	1	0.00944644
1018	2	48020447	Intron 2-3	G	A	-	10580	1	0.0094518
1019	2	48020457	Intron 2-3	AAAAAAAAAAAAA	-	-	2657	3	0.112909
1020	2	48020457	Intron 2-3	AAAAAAAAAAAAAA	-	-	2657	38	1.43018
1021	2	48020457	Intron 2-3	AAAAAAAAAAAAAAA	-	-	2657	2	0.0752729
1022	2	48020482	Intron 2-3	A	C	-	2657	1	0.0376364
1023	2	48020488	Intron 2-3	G	T	-	10588	1	0.00944465
1024	2	48020496	Intron 2-3	C	T	-	13245	5	0.0377501
1025	2	48020496	Intron 2-3	C	G	-	10588	1	0.00944465
1026	2	48020499	Intron 2-3	T	C	-	10588	3	0.028334
1027	2	48020503	Intron 2-3	T	G	-	13245	6	0.0453001
1028	2	48020504	Intron 2-3	C	T	rs560381841	13245	7	0.0528501
1029	2	48020504	Intron 2-3	C	G	-	10588	1	0.00944465
1030	2	48020505	Intron 2-3	G	C	-	10588	1	0.00944465
1031	2	48020505	Intron 2-3	G	A	-	10588	1	0.00944465
1032	2	48020507	Intron 2-3	G	A	rs867858503	10588	1	0.00944465
1033	2	48020514	Intron 2-3	A	G	-	13245	6	0.0453001
1034	2	48020517	Intron 2-3	C	T	-	10588	1	0.00944465
1035	2	48020518	Intron 2-3	C	T	-	2657	1	0.0376364
1036	2	48020545	Intron 2-3	G	T	-	10588	1	0.00944465
1037	2	48020550	Intron 2-3	C	T	rs962155657	10588	1	0.00944465
1038	2	48020551	Intron 2-3	G	A	rs929769670	10588	1	0.00944465
1039	2	48020560	Intron 2-3	C	T	rs567381969	10588	1	0.00944465
1040	2	48020564	Intron 2-3	C	T	rs909624192	10588	1	0.00944465
1041	2	48020565	Intron 2-3	G	A	rs3136295	10588	1	0.00944465
1042	2	48020585	Intron 2-3	G	A	-	10588	1	0.00944465
1043	2	48020612	Intron 2-3	C	A	-	10588	1	0.00944465
1044	2	48020619	Intron 2-3	A	G	-	10588	1	0.00944465
1045	2	48020629	Intron 2-3	C	G	rs528967589	10588	1	0.00944465
1046	2	48020639	Intron 2-3	C	T	-	10588	1	0.00944465
1047	2	48020646	Intron 2-3	C	T	rs1034774987	13245	2	0.0151
1048	2	48020652	Intron 2-3	C	T	-	10588	1	0.00944465
1049	2	48020690	Intron 2-3	G	C	rs3136296	13245	4	0.0302001
1050	2	48020694	Intron 2-3	C	T	-	10588	2	0.0188893
1051	2	48020695	Intron 2-3	G	A	-	10588	1	0.00944465
1052	2	48020700	Intron 2-3	C	T	-	10588	1.5	0.014167
1053	2	48020712	Intron 2-3	C	G	-	10588	1	0.00944465
1054	2	48020719	Intron 2-3	C	T	-	10588	1.5	0.014167
1055	2	48020727	Intron 2-3	C	T	-	10588	1	0.00944465
1056	2	48020728	Intron 2-3	G	A	rs534023203	13245	4	0.0302001
1057	2	48020732	Intron 2-3	T	G	-	10588	3.5	0.0330563
1058	2	48020737	Intron 2-3	C	G	-	10588	1	0.00944465
1059	2	48020747	Intron 2-3	-	AAAT	rs3136299	2657	64	2.40873
1060	2	48020747	Intron 2-3	AAAT	-	-	2657	1	0.0376364
1061	2	48020766	Intron 2-3	A	T	rs538317438	2747	48	1.74736
1062	2	48020780	Intron 2-3	A	T	rs141293497	2657	2	0.0752729
1063	2	48020781	Intron 2-3	AATA	-	-	2657	1	0.0376364
1064	2	48020808	Intron 2-3	T	C	rs182275454	10588	12.5	0.118058
1065	2	48020816	Intron 2-3	G	C	-	10588	2	0.0188893
1066	2	48020822	Intron 2-3	A	G	-	10588	1	0.00944465
1067	2	48020823	Intron 2-3	T	C	rs1004059781	10588	1	0.00944465
1068	2	48020831	Intron 2-3	C	T	-	2657	1	0.0376364
1069	2	48020836	Intron 2-3	T	C	-	10588	1	0.00944465
1070	2	48020843	Intron 2-3	C	A	-	10588	1	0.00944465
1071	2	48020848	Intron 2-3	T	A	-	10588	4	0.0377786
1072	2	48020850	Intron 2-3	G	T	-	10588	5.5	0.0519456
1073	2	48020865	Intron 2-3	T	G	rs111742886	10588	6	0.0566679
1074	2	48020876	Intron 2-3	-	T	-	3254	6	0.184388
1075	2	48020887	Intron 2-3	T	A	rs561124792	2747	7	0.254823
1076	2	48020888	Intron 2-3	G	A	rs576531589	2747	7	0.254823
1077	2	48020889	Intron 2-3	C	A	rs544310423	13335	18	0.134983
1078	2	48020892	Intron 2-3	C	T	rs137989074	10588	2.5	0.0236116
1079	2	48020893	Intron 2-3	G	A	rs117337791	10588	2	0.0188893
1080	2	48020917	Intron 2-3	T	A	rs185618339	10588	1	0.00944465
1081	2	48020970	Intron 2-3	A	G	-	13245	19	0.14345
1082	2	48021036	Intron 2-3	A	G	-	10588	1	0.00944465
1083	2	48021061	Intron 2-3	A	G	-	10588	1	0.00944465
1084	2	48021073	Intron 2-3	G	T	-	10588	1	0.00944465
1085	2	48021078	Intron 2-3	C	G	-	10588	1	0.00944465
1086	2	48021090	Intron 2-3	C	G	-	2657	1	0.0376364
1087	2	48021097	Intron 2-3	C	T	-	10588	2.5	0.0236116
1088	2	48021113	Intron 2-3	C	T	rs374781165	13335	208.5	1.56355
1089	2	48021114	Intron 2-3	G	A	rs3136300	10588	5.5	0.0519456
1090	2	48021120	Intron 2-3	C	G	-	10588	1	0.00944465
1091	2	48021146	Intron 2-3	G	C	-	10588	1	0.00944465
1092	2	48021149	Intron 2-3	G	A	rs966326562	13245	21.5	0.162325
1093	2	48021155	Intron 2-3	C	T	-	10588	1	0.00944465
1094	2	48021165	Intron 2-3	G	T	-	610	1	0.163934
1095	2	48021173	Intron 2-3	T	A	-	2657	1	0.0376364
1096	2	48021176	Intron 2-3	T	C	rs2908441	11885	10605	89.2301
1097	2	48021204	Intron 2-3	A	-	-	13245	13244	99.9924
1098	2	48021205	Intron 2-3	A	-	rs70943323	1207	12	0.9942
1099	2	48021215	Intron 2-3	C	T	-	2657	1	0.0376364
1100	2	48021217	Intron 2-3	C	T	rs3136301	13245	5	0.0377501
1101	2	48021218	Intron 2-3	G	A	rs536568867	10588	1	0.00944465
1102	2	48021219	Intron 2-3	C	G	-	10588	1	0.00944465
1103	2	48021237	Intron 2-3	T	C	rs554807383	10588	2.5	0.0236116
1104	2	48021242	Intron 2-3	G	T	-	13245	2	0.0151
1105	2	48021246	Intron 2-3	A	G	rs2908440	11795	10596.5	89.8389
1106	2	48021250	Intron 2-3	T	C	-	10588	1	0.00944465
1107	2	48021254	Intron 2-3	T	C	rs2908439	14452	13235	91.579
1108	2	48021255	Intron 2-3	G	A	-	10588	1	0.00944465
1109	2	48021278	Intron 2-3	C	G	rs2908438	11795	10595	89.8262
1110	2	48021283	Intron 2-3	A	C	-	13245	12	0.0906002
1111	2	48021296	Intron 2-3	A	G	rs545059924	10588	1	0.00944465
1112	2	48021309	Intron 2-3	TC	-	-	10588	1	0.00944465
1113	2	48021313	Intron 2-3	C	G	rs1009550875	10588	1	0.00944465
1114	2	48021324	Intron 2-3	C	-	-	13245	209.5	1.58173
1115	2	48021326	Intron 2-3	A	C	-	2657	4	0.150546
1116	2	48021336	Intron 2-3	C	G	-	10588	1	0.00944465
1117	2	48021340	Intron 2-3	C	T	-	10588	1	0.00944465
1118	2	48021341	Intron 2-3	A	G	-	10588	1	0.00944465
1119	2	48021352	Intron 2-3	T	A	-	10588	2	0.0188893
1120	2	48021379	Intron 2-3	G	C	rs3136302	13335	3775	28.309
1121	2	48021386	Intron 2-3	A	T	-	13245	4	0.0302001
1122	2	48021390	Intron 2-3	T	C	-	10588	1	0.00944465
1123	2	48021399	Intron 2-3	C	A	-	10588	1	0.00944465
1124	2	48021401	Intron 2-3	C	G	-	10588	1	0.00944465
1125	2	48021402	Intron 2-3	G	A	rs1020712145	13335	3	0.0224972
1126	2	48021406	Intron 2-3	G	A	-	10588	1	0.00944465
1127	2	48021410	Intron 2-3	TTTCTTT	-	-	10588	1	0.00944465
1128	2	48021416	Intron 2-3	T	G	-	13245	4.5	0.0339751
1129	2	48021417	Intron 2-3	TTTC	-	-	10588	1	0.00944465
1130	2	48021421	Intron 2-3	TTTTTT	-	-	10588	2.5	0.0236116
1131	2	48021441	Intron 2-3	C	T	-	10588	1	0.00944465
1132	2	48021467	Intron 2-3	A	G	rs3136303	13335	15	0.112486
1133	2	48021474	Intron 2-3	A	G	rs926873686	10588	1	0.00944465
1134	2	48021485	Intron 2-3	A	G	rs938196298	13245	14	0.1057
1135	2	48021491	Intron 2-3	A	G	rs532124835	13335	65	0.487439
1136	2	48021491	Intron 2-3	A	T	-	10588	1	0.00944465
1137	2	48021501	Intron 2-3	C	T	-	10588	1	0.00944465
1138	2	48021502	Intron 2-3	C	T	rs753942393	13245	7	0.0528501
1139	2	48021503	Intron 2-3	G	A	-	10588	1	0.00944465
1140	2	48021511	Intron 2-3	A	C	-	2657	1	0.0376364
1141	2	48021542	Intron 2-3	C	G	-	10588	1	0.00944465
1142	2	48021557	Intron 2-3	T	G	-	10588	1	0.00944465
1143	2	48021562	Intron 2-3	C	T	-	2657	1	0.0376364
1144	2	48021573	Intron 2-3	G	A	-	10588	1	0.00944465
1145	2	48021634	Intron 2-3	C	T	rs1026026500	10588	1	0.00944465
1146	2	48021636	Intron 2-3	C	G	-	13245	2	0.0151
1147	2	48021636	Intron 2-3	C	T	rs567016813	10588	1.5	0.014167
1148	2	48021641	Intron 2-3	C	T	rs926898624	10588	1	0.00944465
1149	2	48021666	Intron 2-3	-	T	rs200955579	13245	8	0.0604002
1150	2	48021666	Intron 2-3	C	T	rs992326423	2657	1	0.0376364
1151	2	48021672	Intron 2-3	A	C	-	2657	1	0.0376364
1152	2	48021733	Intron 2-3	C	T	rs974529562	13245	8	0.0604002
1153	2	48021738	Intron 2-3	T	C	-	10588	1	0.00944465
1154	2	48021739	Intron 2-3	G	A	-	10588	1	0.00944465
1155	2	48021739	Intron 2-3	G	T	-	610	1	0.163934
1156	2	48021755	Intron 2-3	T	A	rs1049705274	10587	3	0.0283366
1157	2	48021759	Intron 2-3	A	T	-	10588	1	0.00944465
1158	2	48021760	Intron 2-3	C	T	rs889074154	10588	1	0.00944465
1159	2	48021762	Intron 2-3	C	T	rs183907677	13245	4	0.0302001
1160	2	48021763	Intron 2-3	G	A	rs77163048	10588	1	0.00944465
1161	2	48021768	Intron 2-3	G	C	-	10588	1	0.00944465
1162	2	48021778	Intron 2-3	G	C	-	90	1	1.11111
1163	2	48021810	Intron 2-3	A	G	-	10588	1	0.00944465
1164	2	48021853	Intron 2-3	C	G	-	10588	1	0.00944465
1165	2	48021876	Intron 2-3	A	G	rs1027474381	13245	12.5	0.0943752
1166	2	48021889	Intron 2-3	ATC	-	-	13245	8.5	0.0641752
1167	2	48021917	Intron 2-3	A	C	rs143772152	13245	6	0.0453001
1168	2	48021919	Intron 2-3	T	G	rs1050221413	10588	1	0.00944465
1169	2	48021935	Intron 2-3	TGTT	-	-	13245	18.5	0.139675
1170	2	48021971	Intron 2-3	T	C	rs200886043	13945	398.5	2.85766
1171	2	48021972	Intron 2-3	C	T	rs996064895	10588	1.5	0.014167
1172	2	48021988	Intron 2-3	C	T	-	10588	1	0.00944465
1173	2	48021996	Intron 2-3	C	T	-	10588	1	0.00944465
1174	2	48022008	Intron 2-3	A	C	-	10588	1.5	0.014167
1175	2	48022009	Intron 2-3	C	G	-	10588	1	0.00944465
1176	2	48022020	Intron 2-3	G	A	rs3136305	13245	4	0.0302001
1177	2	48022020	Intron 2-3	G	C	-	10588	1	0.00944465
1178	2	48022027	Intron 2-3	G	A	rs3136307	13245	9	0.0679502
1179	2	48022038	Intron 2-3	A	G	-	10588	1	0.00944465
1180	2	48022040	Intron 2-3	T	C	-	10588	1	0.00944465
1181	2	48022053	Intron 2-3	C	T	-	10588	1	0.00944465
1182	2	48022058	Intron 2-3	C	T	-	10588	1	0.00944465
1183	2	48022059	Intron 2-3	G	A	rs1013176127	10588	1	0.00944465
1184	2	48022087	Intron 2-3	C	T	-	10588	1	0.00944465
1185	2	48022092	Intron 2-3	C	G	-	13245	3	0.0226501
1186	2	48022093	Intron 2-3	C	G	-	10588	1	0.00944465
1187	2	48022102	Intron 2-3	T	A	-	13245	2	0.0151
1188	2	48022130	Intron 2-3	C	T	-	10588	1	0.00944465
1189	2	48022153	Intron 2-3	T	C	rs3136308	13245	7	0.0528501
1190	2	48022165	Intron 2-3	C	G	-	13245	3.5	0.0264251
1191	2	48022166	Intron 2-3	T	C	-	2657	1	0.0376364
1192	2	48022169	Intron 2-3	T	C	-	10588	1	0.00944465
1193	2	48022199	Intron 2-3	T	A	-	13245	35.5	0.268026
1194	2	48022213	Intron 2-3	C	T	-	10588	1	0.00944465
1195	2	48022214	Intron 2-3	G	A	rs3136310	13335	649.5	4.87064
1196	2	48022227	Intron 2-3	C	T	-	2657	1	0.0376364
1197	2	48022229	Intron 2-3	G	C	-	13245	2	0.0151
1198	2	48022238	Intron 2-3	T	G	-	10588	1	0.00944465
1199	2	48022242	Intron 2-3	AAGA	-	-	10588	1	0.00944465
1200	2	48022271	Intron 2-3	C	T	rs773816830	10588	1	0.00944465
1201	2	48022293	Intron 2-3	A	G	-	10588	1	0.00944465
1202	2	48022297	Intron 2-3	C	G	-	13245	2	0.0151
1203	2	48022305	Intron 2-3	T	A	-	10588	1	0.00944465
1204	2	48022308	Intron 2-3	A	T	-	2657	1	0.0376364
1205	2	48022311	Intron 2-3	G	C	-	10588	1	0.00944465
1206	2	48022328	Intron 2-3	T	G	-	10588	1	0.00944465
1207	2	48022329	Intron 2-3	T	A	-	10588	4.5	0.0425009
1208	2	48022338	Intron 2-3	G	T	-	10588	1	0.00944465
1209	2	48022341	Intron 2-3	T	A	rs920243985	10588	1	0.00944465
1210	2	48022344	Intron 2-3	G	A	rs553009924	10588	1	0.00944465
1211	2	48022350	Intron 2-3	C	T	-	10588	1	0.00944465
1212	2	48022364	Intron 2-3	A	T	-	10588	1	0.00944465
1213	2	48022379	Intron 2-3	A	G	-	10588	1	0.00944465
1214	2	48022388	Intron 2-3	-	G	-	10588	1	0.00944465
1215	2	48022403	Intron 2-3	C	T	-	10588	1	0.00944465
1216	2	48022405	Intron 2-3	C	T	rs766315000	10588	1	0.00944465
1217	2	48022407	Intron 2-3	A	G	rs559457735	10588	5	0.0472233
1218	2	48022417	Intron 2-3	C	T	-	10588	1.5	0.014167
1219	2	48022431	Intron 2-3	T	A	rs753943141	10588	1	0.00944465
1220	2	48022448	Intron 2-3	ATCT	-	-	10588	2.5	0.0236116
1221	2	48022478	Intron 2-3	-	CATA	-	2657	1	0.0376364
1222	2	48022488	Intron 2-3	T	A	-	10588	1	0.00944465
1223	2	48022497	Intron 2-3	T	G	-	10588	1	0.00944465
1224	2	48022519	Intron 2-3	TGT	-	-	10588	1	0.00944465
1225	2	48022528	Intron 2-3	G	A	-	10588	1	0.00944465
1226	2	48022533	Intron 2-3	TCAAGTGT	-	-	13245	7.5	0.0566251
1227	2	48022534	Intron 2-3	T	G	-	13245	3	0.0226501
1228	2	48022543	Intron 2-3	C	T	-	10588	1	0.00944465
1229	2	48022549	Intron 2-3	A	T	rs182541150	13335	7	0.0524934
1230	2	48022549	Intron 2-3	A	G	-	10588	1	0.00944465
1231	2	48022555	Intron 2-3	T	C	-	13245	9.5	0.0717252
1232	2	48022556	Intron 2-3	T	-	-	10588	1.5	0.014167
1233	2	48022556	Intron 2-3	-	T	-	10588	1	0.00944465
1234	2	48022561	Intron 2-3	-	TGTGTGTG	-	2657	29	1.09146
1235	2	48022561	Intron 2-3	-	TGTGTGTGTG	-	2657	2	0.0752729
1236	2	48022561	Intron 2-3	TG	-	-	2657	58	2.18291
1237	2	48022561	Intron 2-3	TGTG	-	-	2657	2	0.0752729
1238	2	48022561	Intron 2-3	TGTGTG	-	-	2657	6	0.225819
1239	2	48022561	Intron 2-3	TGTGTGTG	-	-	2657	4	0.150546
1240	2	48022561	Intron 2-3	-	TGTG	rs10699372	1207	4	0.3314
1241	2	48022587	Intron 2-3	-	TA	-	2657	1	0.0376364
1242	2	48022589	Intron 2-3	A	G	rs200493761	2657	1	0.0376364
1243	2	48022592	Intron 2-3	-	ATAT	-	10588	1	0.00944465
1244	2	48022596	Intron 2-3	T	C	-	13244	8	0.0604047
1245	2	48022616	Intron 2-3	TTC	-	-	2657	44	1.656
1246	2	48022618	Intron 2-3	-	C	-	2657	1	0.0376364
1247	2	48022631	Intron 2-3	G	A	rs553596033	10588	5.5	0.0519456
1248	2	48022636	Intron 2-3	G	T	-	13245	2	0.0151
1249	2	48022643	Intron 2-3	C	T	rs142225947	13245	2	0.0151
1250	2	48022644	Intron 2-3	G	A	-	10588	1	0.00944465
1251	2	48022654	Intron 2-3	G	A	-	10588	1	0.00944465
1252	2	48022659	Intron 2-3	A	C	-	10588	1	0.00944465
1253	2	48022662	Intron 2-3	T	G	-	10588	1	0.00944465
1254	2	48022668	Intron 2-3	A	G	-	10588	1	0.00944465
1255	2	48022673	Intron 2-3	C	T	-	10588	1	0.00944465
1256	2	48022673	Intron 2-3	C	G	-	10588	2	0.0188893
1257	2	48022674	Intron 2-3	G	A	rs1010892439	13245	4	0.0302001
1258	2	48022686	Intron 2-3	C	T	-	10588	1	0.00944465
1259	2	48022688	Intron 2-3	T	C	rs111861797	13245	9	0.0679502
1260	2	48022696	Intron 2-3	C	T	rs1003385507	10588	1	0.00944465
1261	2	48022709	Intron 2-3	A	G	-	10588	1	0.00944465
1262	2	48022724	Intron 2-3	C	T	-	10588	1	0.00944465
1263	2	48022733	Intron 2-3	T	C	-	10588	1.5	0.014167
1264	2	48022735	Intron 2-3	G	A	-	10678	5	0.0468252
1265	2	48022750	Intron 2-3	CA	-	-	13245	8	0.0604002
1266	2	48022754	Intron 2-3	A	C	-	10588	1	0.00944465
1267	2	48022760	Intron 2-3	A	G	rs3136315	13245	9	0.0679502
1268	2	48022779	Intron 2-3	A	T	rs951826485	2657	1	0.0376364
1269	2	48022779	Intron 2-3	T	-	-	2657	1	0.0376364
1270	2	48022806	Intron 2-3	C	T	-	10588	1	0.00944465
1271	2	48022815	Intron 2-3	G	A	rs55781315	13945	208.5	1.49516
1272	2	48022822	Intron 2-3	C	G	-	10588	3	0.028334
1273	2	48022822	Intron 2-3	C	T	-	10588	1.5	0.014167
1274	2	48022827	Intron 2-3	C	G	-	10588	1	0.00944465
1275	2	48022831	Intron 2-3	A	C	-	10588	1	0.00944465
1276	2	48022843	Intron 2-3	C	A	-	2657	1	0.0376364
1277	2	48022849	Intron 2-3	G	T	-	10588	1	0.00944465
1278	2	48022852	Intron 2-3	C	T	rs146979181	10588	1	0.00944465
1279	2	48022853	Intron 2-3	G	A	rs958662264	10588	1	0.00944465
1280	2	48022871	Intron 2-3	A	C	-	10588	1	0.00944465
1281	2	48022888	Intron 2-3	G	T	-	610	1	0.163934
1282	2	48022900	Intron 2-3	A	G	rs3136316	14542	12582	86.5218
1283	2	48022916	Intron 2-3	T	C	-	10588	1	0.00944465
1284	2	48022921	Intron 2-3	T	G	-	10588	1	0.00944465
1285	2	48022930	Intron 2-3	G	A	-	10588	5	0.0472233
1286	2	48022941	Intron 2-3	C	T	-	10588	1	0.00944465
1287	2	48022981	Intron 2-3	G	T	rs1800934	13945	3993.5	28.6375
1288	2	48022982	Intron 2-3	C	T	rs762744341	10588	1	0.00944465
1289	2	48022983	Intron 2-3	G	A	rs763906078	11198	2.5	0.0223254
1290	2	48022999	Intron 2-3	G	A	rs375322446	10588	1	0.00944465
1291	2	48023000	Intron 2-3	C	-	-	10588	1	0.00944465
1292	2	48023021	Intron 2-3	T	-	-	13245	2	0.0151
1293	2	48023211	Intron 3-4	C	T	rs373155872	11198	2	0.0178603
1294	2	48023213	Intron 3-4	G	A	-	10588	1	0.00944465
1295	2	48023233	Intron 3-4	T	C	-	10588	1	0.00944465
1296	2	48023241	Intron 3-4	G	A	rs760667163	10588	1	0.00944465
1297	2	48023275	Intron 3-4	C	T	-	10588	1	0.00944465
1298	2	48023301	Intron 3-4	G	C	-	10588	1	0.00944465
1299	2	48023304	Intron 3-4	T	A	-	10588	1	0.00944465
1300	2	48023322	Intron 3-4	A	G	-	10588	1	0.00944465
1301	2	48023341	Intron 3-4	T	C	-	13245	3	0.0226501
1302	2	48023355	Intron 3-4	TG	-	-	2657	1	0.0376364
1303	2	48023356	Intron 3-4	T	C	-	2657	1	0.0376364
1304	2	48023357	Intron 3-4	G	T	-	10588	1	0.00944465
1305	2	48023366	Intron 3-4	G	C	-	10588	1	0.00944465
1306	2	48023371	Intron 3-4	G	A	-	610	1	0.163934
1307	2	48023391	Intron 3-4	C	T	-	10588	1	0.00944465
1308	2	48023396	Intron 3-4	A	G	-	10588	1	0.00944465
1309	2	48023399	Intron 3-4	G	T	-	10588	1	0.00944465
1310	2	48023423	Intron 3-4	A	T	-	10588	1	0.00944465
1311	2	48023494	Intron 3-4	A	T	-	10588	1.5	0.014167
1312	2	48023499	Intron 3-4	A	G	-	10588	3	0.028334
1313	2	48023502	Intron 3-4	T	C	-	10588	1	0.00944465
1314	2	48023509	Intron 3-4	-	TATA	rs3136319	13245	4	0.0302001
1315	2	48023511	Intron 3-4	A	G	rs1022083309	10588	1	0.00944465
1316	2	48023521	Intron 3-4	C	T	-	13245	14.5	0.109475
1317	2	48023533	Intron 3-4	T	C	-	10588	1	0.00944465
1318	2	48023536	Intron 3-4	T	C	-	10588	1	0.00944465
1319	2	48023564	Intron 3-4	T	G	-	10588	1	0.00944465
1320	2	48023581	Intron 3-4	A	G	rs186928058	10588	1	0.00944465
1321	2	48023593	Intron 3-4	C	G	-	10588	1	0.00944465
1322	2	48023596	Intron 3-4	G	C	-	10678	2	0.0187301
1323	2	48023609	Intron 3-4	G	A	rs988763590	10588	1	0.00944465
1324	2	48023635	Intron 3-4	C	T	-	2657	1	0.0376364
1325	2	48023648	Intron 3-4	GGGATTACA	-	-	2657	1	0.0376364
1326	2	48023656	Intron 3-4	C	T	-	10588	1	0.00944465
1327	2	48023660	Intron 3-4	C	T	-	10588	1	0.00944465
1328	2	48023667	Intron 3-4	C	G	rs766908614	2657	2	0.0752729
1329	2	48023687	Intron 3-4	T	G	-	10588	1	0.00944465
1330	2	48023692	Intron 3-4	C	G	-	10588	1	0.00944465
1331	2	48023699	Intron 3-4	T	C	-	10588	1	0.00944465
1332	2	48023732	Intron 3-4	AAG	-	-	13245	5	0.0377501
1333	2	48023753	Intron 3-4	C	A	rs570198958	13245	2	0.0151
1334	2	48023774	Intron 3-4	C	T	-	13245	13.5	0.101925
1335	2	48023774	Intron 3-4	C	G	rs537435606	10588	1	0.00944465
1336	2	48023794	Intron 3-4	T	G	-	10588	1	0.00944465
1337	2	48023819	Intron 3-4	G	A	-	10588	1	0.00944465
1338	2	48023830	Intron 3-4	T	C	-	10588	1	0.00944465
1339	2	48023847	Intron 3-4	C	T	-	10588	1	0.00944465
1340	2	48023849	Intron 3-4	C	T	-	10588	1	0.00944465
1341	2	48023857	Intron 3-4	T	C	rs1031342820	13245	3	0.0226501
1342	2	48023862	Intron 3-4	A	G	-	10588	1	0.00944465
1343	2	48023873	Intron 3-4	T	G	rs2159886	13245	21	0.15855
1344	2	48023897	Intron 3-4	C	G	rs3136321	10588	3	0.028334
1345	2	48023911	Intron 3-4	C	G	rs907256212	2657	1	0.0376364
1346	2	48023912	Intron 3-4	C	A	rs149235534	13245	6	0.0453001
1347	2	48023926	Intron 3-4	CT	-	-	10588	1	0.00944465
1348	2	48023929	Intron 3-4	T	-	-	10588	2	0.0188893
1349	2	48023933	Intron 3-4	C	T	-	10588	1	0.00944465
1350	2	48023936	Intron 3-4	-	A	-	10588	1.5	0.014167
1351	2	48023959	Intron 3-4	G	A	-	10588	1	0.00944465
1352	2	48023960	Intron 3-4	C	T	-	10588	1	0.00944465
1353	2	48023982	Intron 3-4	C	G	-	2657	1	0.0376364
1354	2	48023983	Intron 3-4	C	G	-	13245	2.5	0.018875
1355	2	48024006	Intron 3-4	A	G	-	2657	1	0.0376364
1356	2	48024020	Intron 3-4	ACTTGGGAGGCAGAGGG	-	-	2657	5	0.188182
1357	2	48024048	Intron 3-4	C	G	-	10588	3	0.028334
1358	2	48024069	Intron 3-4	A	G	-	10588	1	0.00944465
1359	2	48024071	Intron 3-4	C	G	-	2657	1	0.0376364
1360	2	48024072	Intron 3-4	G	C	-	10588	1	0.00944465
1361	2	48024103	Intron 3-4	C	T	rs552854871	13245	19.5	0.147225
1362	2	48024148	Intron 3-4	-	AT	-	610	1	0.163934
1363	2	48024152	Intron 3-4	T	A	-	2657	4	0.150546
1364	2	48024159	Intron 3-4	T	A	-	10588	1	0.00944465
1365	2	48024203	Intron 3-4	A	G	rs546343546	13245	4.5	0.0339751
1366	2	48024210	Intron 3-4	C	T	-	10588	2.5	0.0236116
1367	2	48024225	Intron 3-4	A	C	-	10588	1	0.00944465
1368	2	48024229	Intron 3-4	T	C	-	10588	1	0.00944465
1369	2	48024231	Intron 3-4	C	A	-	10588	1	0.00944465
1370	2	48024263	Intron 3-4	T	C	rs943274045	10588	1	0.00944465
1371	2	48024308	Intron 3-4	T	G	-	2657	1	0.0376364
1372	2	48024315	Intron 3-4	A	G	rs1052898099	10588	1	0.00944465
1373	2	48024324	Intron 3-4	G	A	rs3136324	10588	1	0.00944465
1374	2	48024331	Intron 3-4	C	T	-	2657	1	0.0376364
1375	2	48024355	Intron 3-4	C	T	rs3136325	10588	1	0.00944465
1376	2	48024371	Intron 3-4	TAA	-	-	13245	2	0.0151
1377	2	48024378	Intron 3-4	G	T	-	10588	1	0.00944465
1378	2	48024378	Intron 3-4	G	A	-	10588	1	0.00944465
1379	2	48024386	Intron 3-4	C	T	-	13245	2.5	0.018875
1380	2	48024400	Intron 3-4	T	C	-	10588	1	0.00944465
1381	2	48024401	Intron 3-4	C	G	-	2657	1	0.0376364
1382	2	48024402	Intron 3-4	T	C	rs3136326	10588	6	0.0566679
1383	2	48024415	Intron 3-4	A	G	rs369488273	13245	120	0.906002
1384	2	48024433	Intron 3-4	T	C	-	10588	1	0.00944465
1385	2	48024448	Intron 3-4	G	A	-	2657	1	0.0376364
1386	2	48024485	Intron 3-4	A	G	-	10588	1	0.00944465
1387	2	48024492	Intron 3-4	G	T	-	10588	1.5	0.014167
1388	2	48024509	Intron 3-4	A	G	rs1021732704	10588	1	0.00944465
1389	2	48024514	Intron 3-4	A	G	-	10588	5.5	0.0519456
1390	2	48024519	Intron 3-4	C	G	-	10588	1	0.00944465
1391	2	48024524	Intron 3-4	G	C	-	10588	1	0.00944465
1392	2	48024529	Intron 3-4	G	C	-	10588	1	0.00944465
1393	2	48024537	Intron 3-4	T	A	rs146363130	13245	5.5	0.0415251
1394	2	48024551	Intron 3-4	A	G	-	10588	1.5	0.014167
1395	2	48024569	Intron 3-4	G	C	rs769845806	2657	1	0.0376364
1396	2	48024571	Intron 3-4	T	C	-	10588	1	0.00944465
1397	2	48024590	Intron 3-4	G	C	-	10588	1	0.00944465
1398	2	48024591	Intron 3-4	A	G	-	10588	1	0.00944465
1399	2	48024592	Intron 3-4	T	A	-	10588	1	0.00944465
1400	2	48024594	Intron 3-4	C	T	rs1042786889	10588	1.5	0.014167
1401	2	48024607	Intron 3-4	T	G	-	13245	4	0.0302001
1402	2	48024652	Intron 3-4	C	T	-	2657	1	0.0376364
1403	2	48024659	Intron 3-4	C	T	rs142872963	13335	190.5	1.42857
1404	2	48024663	Intron 3-4	A	G	-	10588	1	0.00944465
1405	2	48024686	Intron 3-4	T	C	rs535718757	13245	40.5	0.305776
1406	2	48024698	Intron 3-4	G	A	rs1035973778	10588	1	0.00944465
1407	2	48024725	Intron 3-4	T	C	-	10588	1	0.00944465
1408	2	48024737	Intron 3-4	A	G	-	10588	1	0.00944465
1409	2	48024754	Intron 3-4	T	C	-	10588	1	0.00944465
1410	2	48024787	Intron 3-4	T	C	rs150630649	13335	79	0.592426
1411	2	48024800	Intron 3-4	G	A	-	2657	1	0.0376364
1412	2	48024801	Intron 3-4	G	A	rs34633903	13245	6	0.0453001
1413	2	48024816	Intron 3-4	C	T	rs1056736157	10588	1	0.00944465
1414	2	48024845	Intron 3-4	G	A	rs972626710	10588	1	0.00944465
1415	2	48024848	Intron 3-4	T	C	-	10588	2.5	0.0236116
1416	2	48024850	Intron 3-4	T	G	-	10588	1	0.00944465
1417	2	48024853	Intron 3-4	C	A	-	10588	2.5	0.0236116
1418	2	48024862	Intron 3-4	C	G	-	2657	1	0.0376364
1419	2	48024869	Intron 3-4	C	T	-	10588	1	0.00944465
1420	2	48024876	Intron 3-4	C	T	rs3136329	14542	11961.5	82.2548
1421	2	48024878	Intron 3-4	G	C	-	90	1	1.11111
1422	2	48024932	Intron 3-4	A	G	-	10588	1	0.00944465
1423	2	48024944	Intron 3-4	G	A	-	2657	1	0.0376364
1424	2	48024982	Intron 3-4	C	A	-	10588	1	0.00944465
1425	2	48024990	Intron 3-4	C	T	rs149764803	13335	129	0.967379
1426	2	48025012	Intron 3-4	T	G	-	10588	1	0.00944465
1427	2	48025031	Intron 3-4	T	G	-	10588	1	0.00944465
1428	2	48025032	Intron 3-4	G	A	-	10588	1.5	0.014167
1429	2	48025052	Intron 3-4	A	C	-	10588	1	0.00944465
1430	2	48025065	Intron 3-4	G	C	-	2657	1	0.0376364
1431	2	48025068	Intron 3-4	C	G	-	10588	1	0.00944465
1432	2	48025085	Intron 3-4	T	C	-	10588	1	0.00944465
1433	2	48025086	Intron 3-4	T	C	-	10588	1	0.00944465
1434	2	48025091	Intron 3-4	T	G	-	10588	1	0.00944465
1435	2	48025097	Intron 3-4	C	T	-	2657	1	0.0376364
1436	2	48025098	Intron 3-4	C	G	-	2657	1	0.0376364
1437	2	48025104	Intron 3-4	C	T	-	10588	1	0.00944465
1438	2	48025128	Intron 3-4	G	A	-	10588	1	0.00944465
1439	2	48025169	Intron 3-4	G	A	-	13245	3	0.0226501
1440	2	48025169	Intron 3-4	G	C	-	10588	1	0.00944465
1441	2	48025171	Intron 3-4	CTT	-	-	13245	7	0.0528501
1442	2	48025173	Intron 3-4	T	A	rs147615035	2657	2	0.0752729
1443	2	48025218	Intron 3-4	C	G	rs551586922	10588	2	0.0188893
1444	2	48025230	Intron 3-4	A	G	-	10588	1	0.00944465
1445	2	48025232	Intron 3-4	T	-	-	13245	15.5	0.117025
1446	2	48025232	Intron 3-4	-	T	rs1009405506	10588	1	0.00944465
1447	2	48025240	Intron 3-4	T	C	-	10588	1	0.00944465
1448	2	48025261	Intron 3-4	C	T	-	10588	1	0.00944465
1449	2	48025264	Intron 3-4	T	C	-	13245	2	0.0151
1450	2	48025292	Intron 3-4	T	C	-	10588	1	0.00944465
1451	2	48025307	Intron 3-4	A	G	-	10588	1	0.00944465
1452	2	48025331	Intron 3-4	C	T	-	10588	1	0.00944465
1453	2	48025345	Intron 3-4	T	G	rs537806020	13245	8	0.0604002
1454	2	48025346	Intron 3-4	G	T	-	13245	2	0.0151
1455	2	48025348	Intron 3-4	G	A	rs758167337	10588	1	0.00944465
1456	2	48025376	Intron 3-4	C	T	-	10588	1.5	0.014167
1457	2	48025386	Intron 3-4	G	C	-	10588	1	0.00944465
1458	2	48025403	Intron 3-4	G	C	-	10588	1	0.00944465
1459	2	48025419	Intron 3-4	C	G	-	10588	1	0.00944465
1460	2	48025435	Intron 3-4	G	T	-	10588	2	0.0188893
1461	2	48025440	Intron 3-4	C	T	-	10588	1	0.00944465
1462	2	48025442	Intron 3-4	AAACTAAA	-	-	2657	1	0.0376364
1463	2	48025451	Intron 3-4	A	G	-	10588	1	0.00944465
1464	2	48025464	Intron 3-4	C	A	-	10588	1	0.00944465
1465	2	48025467	Intron 3-4	C	A	-	10588	1	0.00944465
1466	2	48025476	Intron 3-4	C	T	rs572278184	10588	1	0.00944465
1467	2	48025477	Intron 3-4	G	A	rs953588643	10588	1	0.00944465
1468	2	48025494	Intron 3-4	C	T	-	10588	1	0.00944465
1469	2	48025495	Intron 3-4	G	A	-	10588	2.5	0.0236116
1470	2	48025498	Intron 3-4	CCTAA	-	-	13245	2	0.0151
1471	2	48025504	Intron 3-4	C	T	-	10588	1	0.00944465
1472	2	48025515	Intron 3-4	C	T	rs912012183	10588	1	0.00944465
1473	2	48025530	Intron 3-4	T	A	-	10588	1	0.00944465
1474	2	48025538	Intron 3-4	A	G	-	2657	3	0.112909
1475	2	48025554	Intron 3-4	A	C	rs143086429	13945	58	0.41592
1476	2	48025568	Intron 3-4	A	G	-	10588	1	0.00944465
1477	2	48025587	Intron 3-4	G	T	-	10588	1	0.00944465
1478	2	48025595	Intron 3-4	C	T	-	2657	1	0.0376364
1479	2	48025595	Intron 3-4	C	G	-	10588	1	0.00944465
1480	2	48025601	Intron 3-4	C	T	-	10588	1	0.00944465
1481	2	48025610	Intron 3-4	C	T	-	10588	1	0.00944465
1482	2	48025611	Intron 3-4	A	G	-	10588	1	0.00944465
1483	2	48025613	Intron 3-4	C	T	rs1045572461	10588	1.5	0.014167
1484	2	48025638	Intron 3-4	AG	-	-	10588	1.5	0.014167
1485	2	48025644	Intron 3-4	C	G	-	13855	15.5	0.111873
1486	2	48025648	Intron 3-4	A	G	-	13245	3	0.0226501
1487	2	48025649	Intron 3-4	C	G	rs183569992	13245	23	0.17365
1488	2	48025676	Intron 3-4	A	G	rs551670937	10588	1	0.00944465
1489	2	48025692	Intron 3-4	T	G	-	10588	1	0.00944465
1490	2	48025694	Intron 3-4	C	T	rs1800936	13245	11.5	0.0868252
1491	2	48025702	Intron 3-4	T	G	-	2657	1	0.0376364
1492	2	48025716	Intron 3-4	A	G	rs759737160	10588	1	0.00944465
1493	2	48025736	Intron 3-4	T	G	-	10588	1	0.00944465
1494	2	48028301	Intron 4-5	TT	-	-	13245	3	0.0226501
1495	2	48028302	Intron 4-5	T	G	rs984296149	11198	3.5	0.0312556
1496	2	48028307	Intron 4-5	A	T	-	10588	1	0.00944465
1497	2	48028309	Intron 4-5	A	G	rs911338946	10588	1	0.00944465
1498	2	48028310	Intron 4-5	A	G	-	10588	1	0.00944465
1499	2	48028314	Intron 4-5	T	C	rs3136335	13245	2	0.0151
1500	2	48028335	Intron 4-5	A	T	-	610	1	0.163934
1501	2	48028352	Intron 4-5	-	T	-	10588	1	0.00944465
1502	2	48028354	Intron 4-5	A	G	rs887120197	10587	1	0.00944555
1503	2	48028355	Intron 4-5	T	A	-	10588	1	0.00944465
1504	2	48028372	Intron 4-5	A	C	-	10588	1	0.00944465
1505	2	48028392	Intron 4-5	A	G	-	10588	1	0.00944465
1506	2	48028407	Intron 4-5	C	G	rs535635325	10588	1	0.00944465
1507	2	48028412	Intron 4-5	A	G	-	10588	1	0.00944465
1508	2	48028414	Intron 4-5	A	G	-	13855	6	0.0433057
1509	2	48028465	Intron 4-5	C	T	rs3136337	13245	12	0.0906002
1510	2	48028468	Intron 4-5	T	C	-	13245	2.5	0.018875
1511	2	48028481	Intron 4-5	G	A	rs531209995	13854	15.5	0.111881
1512	2	48028501	Intron 4-5	T	G	rs922699084	2657	1	0.0376364
1513	2	48028501	Intron 4-5	T	C	-	610	1	0.163934
1514	2	48028502	Intron 4-5	T	A	-	610	1	0.163934
1515	2	48028503	Intron 4-5	T	G	-	2657	7	0.263455
1516	2	48028506	Intron 4-5	T	G	rs867186948	2657	2	0.0752729
1517	2	48028526	Intron 4-5	G	T	-	2657	8	0.301091
1518	2	48028539	Intron 4-5	G	T	-	10588	1	0.00944465
1519	2	48028542	Intron 4-5	C	G	-	10588	1	0.00944465
1520	2	48028550	Intron 4-5	C	T	rs894432330	13245	6.5	0.0490751
1521	2	48028570	Intron 4-5	A	-	-	10588	1	0.00944465
1522	2	48028576	Intron 4-5	T	C	-	10588	1	0.00944465
1523	2	48028591	Intron 4-5	C	T	rs1029752564	10588	1	0.00944465
1524	2	48028601	Intron 4-5	G	T	-	10588	1	0.00944465
1525	2	48028608	Intron 4-5	G	T	-	10588	1	0.00944465
1526	2	48028627	Intron 4-5	C	G	-	2657	1	0.0376364
1527	2	48028630	Intron 4-5	C	T	-	10588	1	0.00944465
1528	2	48028631	Intron 4-5	C	T	-	10588	1	0.00944465
1529	2	48028635	Intron 4-5	T	C	-	13245	3.5	0.0264251
1530	2	48028642	Intron 4-5	G	A	rs7600377	10588	1	0.00944465
1531	2	48028650	Intron 4-5	T	-	-	2657	1	0.0376364
1532	2	48028657	Intron 4-5	C	T	-	10588	1	0.00944465
1533	2	48028660	Intron 4-5	-	CATG	-	13245	10	0.0755002
1534	2	48028663	Intron 4-5	T	C	rs370830612	10588	1	0.00944465
1535	2	48028665	Intron 4-5	C	A	-	610	1	0.163934
1536	2	48028668	Intron 4-5	G	T	-	10588	1	0.00944465
1537	2	48028692	Intron 4-5	G	C	-	10588	5	0.0472233
1538	2	48028701	Intron 4-5	CTCA	-	-	10588	1	0.00944465
1539	2	48028702	Intron 4-5	C	G	-	10588	1	0.00944465
1540	2	48028713	Intron 4-5	G	T	-	10588	1	0.00944465
1541	2	48028721	Intron 4-5	T	C	-	597	1	0.167504
1542	2	48028725	Intron 4-5	C	A	-	2657	1	0.0376364
1543	2	48028740	Intron 4-5	T	G	rs897659256	13245	27.5	0.207626
1544	2	48028759	Intron 4-5	C	T	rs1007653797	10588	1.5	0.014167
1545	2	48028776	Intron 4-5	G	T	-	597	1	0.167504
1546	2	48028795	Intron 4-5	A	G	-	10588	1	0.00944465
1547	2	48028799	Intron 4-5	C	T	rs148739325	10588	1	0.00944465
1548	2	48028800	Intron 4-5	G	A	rs778167920	10588	1	0.00944465
1549	2	48028805	Intron 4-5	G	T	-	10588	1	0.00944465
1550	2	48028812	Intron 4-5	C	T	-	10588	7.5	0.0708349
1551	2	48028812	Intron 4-5	C	A	rs1052263202	10588	1	0.00944465
1552	2	48028829	Intron 4-5	C	T	rs747288461	10588	1	0.00944465
1553	2	48028830	Intron 4-5	G	A	rs992080942	13245	24.5	0.184975
1554	2	48028830	Intron 4-5	G	C	-	10588	1	0.00944465
1555	2	48028833	Intron 4-5	-	A	-	10588	1	0.00944465
1556	2	48028835	Intron 4-5	A	G	-	10588	1	0.00944465
1557	2	48028846	Intron 4-5	T	G	-	10588	1	0.00944465
1558	2	48028850	Intron 4-5	-	A	-	10588	1	0.00944465
1559	2	48028851	Intron 4-5	A	C	rs185203893	13244	20	0.151012
1560	2	48028866	Intron 4-5	C	T	-	13245	2	0.0151
1561	2	48028866	Intron 4-5	C	A	-	10588	1.5	0.014167
1562	2	48028889	Intron 4-5	G	C	-	2657	1	0.0376364
1563	2	48028889	Intron 4-5	G	A	rs760863869	10588	3	0.028334
1564	2	48028892	Intron 4-5	T	C	-	10588	1	0.00944465
1565	2	48028900	Intron 4-5	T	C	-	10588	1.5	0.014167
1566	2	48028930	Intron 4-5	G	A	rs556690583	13245	2	0.0151
1567	2	48028932	Intron 4-5	C	T	rs866455899	10588	1	0.00944465
1568	2	48028933	Intron 4-5	G	A	rs189920904	10588	1	0.00944465
1569	2	48028945	Intron 4-5	-	T	-	2657	1	0.0376364
1570	2	48028945	Intron 4-5	T	-	-	10588	1	0.00944465
1571	2	48028947	Intron 4-5	T	C	-	10588	1	0.00944465
1572	2	48028955	Intron 4-5	GGGGGAA	-	-	10588	1.5	0.014167
1573	2	48028969	Intron 4-5	A	C	-	10588	1	0.00944465
1574	2	48028977	Intron 4-5	G	A	-	10588	1.5	0.014167
1575	2	48029007	Intron 4-5	G	-	-	10588	1	0.00944465
1576	2	48029018	Intron 4-5	C	T	-	10588	1	0.00944465
1577	2	48029023	Intron 4-5	A	C	-	10588	1	0.00944465
1578	2	48029029	Intron 4-5	C	T	-	13245	2	0.0151
1579	2	48029035	Intron 4-5	G	T	-	10588	1	0.00944465
1580	2	48029061	Intron 4-5	G	A	-	10588	1	0.00944465
1581	2	48029065	Intron 4-5	G	T	-	610	1	0.163934
1582	2	48029072	Intron 4-5	C	T	rs371285996	13245	38.5	0.290676
1583	2	48029073	Intron 4-5	G	A	rs761418662	10588	1	0.00944465
1584	2	48029078	Intron 4-5	C	T	rs970540451	13245	2	0.0151
1585	2	48029082	Intron 4-5	C	T	-	10588	1	0.00944465
1586	2	48029130	Intron 4-5	A	C	rs528744963	2657	1	0.0376364
1587	2	48029131	Intron 4-5	G	C	-	2657	1	0.0376364
1588	2	48029135	Intron 4-5	G	A	-	10588	1	0.00944465
1589	2	48029150	Intron 4-5	A	G	rs139821114	2657	1	0.0376364
1590	2	48029151	Intron 4-5	T	C	-	10588	1	0.00944465
1591	2	48029177	Intron 4-5	G	C	-	10588	1	0.00944465
1592	2	48029192	Intron 4-5	A	G	-	10588	1	0.00944465
1593	2	48029219	Intron 4-5	C	T	-	10588	1	0.00944465
1594	2	48029241	Intron 4-5	T	C	-	10588	1	0.00944465
1595	2	48029252	Intron 4-5	G	A	-	10588	1	0.00944465
1596	2	48029260	Intron 4-5	G	T	-	2657	4	0.150546
1597	2	48029277	Intron 4-5	C	T	rs78380118	13245	7.5	0.0566251
1598	2	48029279	Intron 4-5	A	G	-	10588	1	0.00944465
1599	2	48029296	Intron 4-5	C	A	-	2657	1	0.0376364
1600	2	48029308	Intron 4-5	A	C	rs921115299	10588	2	0.0188893
1601	2	48029316	Intron 4-5	T	C	rs574520587	10588	1	0.00944465
1602	2	48029318	Intron 4-5	T	C	-	2657	2	0.0752729
1603	2	48029338	Intron 4-5	T	C	rs904040720	2657	1	0.0376364
1604	2	48029342	Intron 4-5	T	G	rs912295265	10588	2	0.0188893
1605	2	48029356	Intron 4-5	G	A	-	2657	1	0.0376364
1606	2	48029381	Intron 4-5	C	G	-	13245	2	0.0151
1607	2	48029385	Intron 4-5	C	T	-	10588	1	0.00944465
1608	2	48029406	Intron 4-5	TTCT	-	-	10588	1	0.00944465
1609	2	48029417	Intron 4-5	G	A	rs906042029	10588	1	0.00944465
1610	2	48029421	Intron 4-5	C	T	rs575716322	10588	1	0.00944465
1611	2	48029422	Intron 4-5	G	T	-	2657	1	0.0376364
1612	2	48029422	Intron 4-5	G	A	-	10588	1	0.00944465
1613	2	48029423	Intron 4-5	G	A	-	10588	1	0.00944465
1614	2	48029430	Intron 4-5	T	C	-	10588	1	0.00944465
1615	2	48029434	Intron 4-5	C	T	-	10588	1	0.00944465
1616	2	48029459	Intron 4-5	T	C	-	10588	1	0.00944465
1617	2	48029475	Intron 4-5	-	T	-	10588	1	0.00944465
1618	2	48029483	Intron 4-5	T	A	rs562319876	2657	1	0.0376364
1619	2	48029493	Intron 4-5	G	T	-	10588	1	0.00944465
1620	2	48029497	Intron 4-5	C	T	rs779047211	13245	3	0.0226501
1621	2	48029498	Intron 4-5	G	A	rs748322410	10588	1	0.00944465
1622	2	48029503	Intron 4-5	C	T	-	10588	1	0.00944465
1623	2	48029518	Intron 4-5	C	G	rs529423548	10588	1	0.00944465
1624	2	48029558	Intron 4-5	C	A	rs939783078	13245	2	0.0151
1625	2	48029586	Intron 4-5	C	T	-	10588	1.5	0.014167
1626	2	48029606	Intron 4-5	A	T	-	10588	1	0.00944465
1627	2	48029608	Intron 4-5	T	C	-	2657	1	0.0376364
1628	2	48029616	Intron 4-5	G	A	-	10588	1	0.00944465
1629	2	48029628	Intron 4-5	C	T	-	10588	1	0.00944465
1630	2	48029628	Intron 4-5	C	G	-	10588	1	0.00944465
1631	2	48029653	Intron 4-5	A	G	-	10588	1	0.00944465
1632	2	48029660	Intron 4-5	G	A	-	10588	1	0.00944465
1633	2	48029671	Intron 4-5	G	A	-	10588	1	0.00944465
1634	2	48029681	Intron 4-5	G	C	-	10588	1	0.00944465
1635	2	48029691	Intron 4-5	G	A	-	2657	2	0.0752729
1636	2	48029697	Intron 4-5	C	G	-	10588	1.5	0.014167
1637	2	48029709	Intron 4-5	C	T	rs558832435	13245	3	0.0226501
1638	2	48029712	Intron 4-5	T	C	-	10588	1	0.00944465
1639	2	48029718	Intron 4-5	C	T	rs191314319	13245	6.5	0.0490751
1640	2	48029719	Intron 4-5	G	A	rs1030197874	13245	2.5	0.018875
1641	2	48029727	Intron 4-5	C	A	-	10588	1	0.00944465
1642	2	48029730	Intron 4-5	C	T	rs954532773	10588	1	0.00944465
1643	2	48029731	Intron 4-5	G	T	-	2657	1	0.0376364
1644	2	48029731	Intron 4-5	G	A	-	10588	1	0.00944465
1645	2	48029749	Intron 4-5	C	T	rs183808334	10588	1.5	0.014167
1646	2	48029750	Intron 4-5	G	A	rs145300146	10588	1	0.00944465
1647	2	48029752	Intron 4-5	A	G	-	10588	1	0.00944465
1648	2	48029762	Intron 4-5	G	A	-	10588	1	0.00944465
1649	2	48029763	Intron 4-5	C	T	rs189539141	10588	3	0.028334
1650	2	48029774	Intron 4-5	TTT	-	-	2657	5	0.188182
1651	2	48029784	Intron 4-5	T	G	-	2657	1	0.0376364
1652	2	48029796	Intron 4-5	T	A	rs942076368	2657	1	0.0376364
1653	2	48029797	Intron 4-5	A	T	-	597	1	0.167504
1654	2	48029798	Intron 4-5	A	T	-	597	1	0.167504
1655	2	48029799	Intron 4-5	A	T	-	597	1	0.167504
1656	2	48029821	Intron 4-5	GTAACACA	-	-	10588	1	0.00944465
1657	2	48029825	Intron 4-5	A	G	rs1037711484	13245	13.5	0.101925
1658	2	48029836	Intron 4-5	A	-	-	10588	1.5	0.014167
1659	2	48029856	Intron 4-5	C	T	rs904604141	10588	1.5	0.014167
1660	2	48029857	Intron 4-5	-	C	-	10588	1	0.00944465
1661	2	48029861	Intron 4-5	G	T	rs374259464	13245	6	0.0453001
1662	2	48029887	Intron 4-5	T	A	-	10588	1	0.00944465
1663	2	48029894	Intron 4-5	T	C	rs57935065	13335	107	0.8024
1664	2	48029897	Intron 4-5	T	C	rs375734986	2657	2	0.0752729
1665	2	48029918	Intron 4-5	G	C	-	10588	1	0.00944465
1666	2	48029939	Intron 4-5	G	T	-	10588	1	0.00944465
1667	2	48029971	Intron 4-5	T	G	-	10588	1	0.00944465
1668	2	48029995	Intron 4-5	T	C	-	10588	1	0.00944465
1669	2	48030007	Intron 4-5	G	T	-	10588	1	0.00944465
1670	2	48030008	Intron 4-5	C	T	-	10588	1	0.00944465
1671	2	48030013	Intron 4-5	T	A	rs931993290	10588	1	0.00944465
1672	2	48030022	Intron 4-5	T	A	rs3136344	10588	5.5	0.0519456
1673	2	48030028	Intron 4-5	T	C	rs145531898	13245	6	0.0453001
1674	2	48030038	Intron 4-5	C	T	-	10588	1	0.00944465
1675	2	48030066	Intron 4-5	T	G	-	2657	1	0.0376364
1676	2	48030083	Intron 4-5	C	T	rs999978247	2657	1	0.0376364
1677	2	48030089	Intron 4-5	C	A	-	10588	2	0.0188893
1678	2	48030089	Intron 4-5	C	T	rs148848619	10588	1	0.00944465
1679	2	48030090	Intron 4-5	G	A	rs377013807	13245	32.5	0.245376
1680	2	48030092	Intron 4-5	C	T	rs563756467	13245	8.5	0.0641752
1681	2	48030100	Intron 4-5	G	C	-	10588	1	0.00944465
1682	2	48030105	Intron 4-5	C	T	-	10588	1	0.00944465
1683	2	48030113	Intron 4-5	C	T	rs3136346	10588	1	0.00944465
1684	2	48030121	Intron 4-5	G	C	-	10588	1	0.00944465
1685	2	48030124	Intron 4-5	C	T	-	10588	1	0.00944465
1686	2	48030158	Intron 4-5	C	G	-	10588	5.5	0.0519456
1687	2	48030177	Intron 4-5	C	A	-	2657	1	0.0376364
1688	2	48030177	Intron 4-5	C	T	rs3136348	13245	7	0.0528501
1689	2	48030178	Intron 4-5	G	A	rs190325380	13335	152	1.13986
1690	2	48030194	Intron 4-5	G	C	-	13245	4	0.0302001
1691	2	48030202	Intron 4-5	C	T	-	10588	1	0.00944465
1692	2	48030205	Intron 4-5	G	A	rs868506306	10588	1.5	0.014167
1693	2	48030207	Intron 4-5	G	A	-	10588	1	0.00944465
1694	2	48030222	Intron 4-5	A	G	rs1055604403	10588	1	0.00944465
1695	2	48030245	Intron 4-5	C	G	-	13245	2	0.0151
1696	2	48030245	Intron 4-5	C	T	-	10588	1	0.00944465
1697	2	48030268	Intron 4-5	G	C	-	10588	1	0.00944465
1698	2	48030271	Intron 4-5	G	C	-	10588	1	0.00944465
1699	2	48030279	Intron 4-5	-	CT	-	13245	5	0.0377501
1700	2	48030290	Intron 4-5	C	T	rs1019965150	10588	1	0.00944465
1701	2	48030291	Intron 4-5	G	T	-	10588	1	0.00944465
1702	2	48030298	Intron 4-5	C	G	-	10588	1	0.00944465
1703	2	48030303	Intron 4-5	C	T	rs3136350	13245	21.5	0.162325
1704	2	48030304	Intron 4-5	G	A	rs145904047	10588	2	0.0188893
1705	2	48030315	Intron 4-5	C	T	-	10588	1	0.00944465
1706	2	48030336	Intron 4-5	C	T	-	10588	2.5	0.0236116
1707	2	48030343	Intron 4-5	C	T	-	10588	1	0.00944465
1708	2	48030346	Intron 4-5	C	T	rs987507882	13245	4.5	0.0339751
1709	2	48030356	Intron 4-5	C	T	-	10588	1	0.00944465
1710	2	48030359	Intron 4-5	T	C	-	10588	1	0.00944465
1711	2	48030361	Intron 4-5	TCTA	-	-	10588	2.5	0.0236116
1712	2	48030373	Intron 4-5	G	C	-	10588	5	0.0472233
1713	2	48030400	Intron 4-5	G	C	-	10588	1	0.00944465
1714	2	48030405	Intron 4-5	T	C	-	10588	1	0.00944465
1715	2	48030410	Intron 4-5	G	A	-	13855	3.5	0.0252616
1716	2	48030417	Intron 4-5	A	G	-	13245	3	0.0226501
1717	2	48030420	Intron 4-5	T	C	-	10588	1	0.00944465
1718	2	48030424	Intron 4-5	-	G	-	10588	1	0.00944465
1719	2	48030434	Intron 4-5	C	T	rs576376239	13245	2.5	0.018875
1720	2	48030435	Intron 4-5	G	C	rs546272696	13245	32	0.241601
1721	2	48030435	Intron 4-5	G	T	-	10588	1	0.00944465
1722	2	48030453	Intron 4-5	G	A	-	10588	1	0.00944465
1723	2	48030454	Intron 4-5	T	G	-	10588	1	0.00944465
1724	2	48030457	Intron 4-5	T	G	rs562052178	13945	44.5	0.319111
1725	2	48030458	Intron 4-5	G	C	rs2072447	14542	12604.5	86.6765
1726	2	48030462	Intron 4-5	T	C	rs138463559	10588	1	0.00944465
1727	2	48030464	Intron 4-5	T	G	rs1029608003	13245	7.5	0.0566251
1728	2	48030482	Intron 4-5	AAG	-	-	10588	1	0.00944465
1729	2	48030491	Intron 4-5	C	T	-	2657	1	0.0376364
1730	2	48030507	Intron 4-5	C	T	-	10588	1	0.00944465
1731	2	48030517	Intron 4-5	C	T	rs966152822	10588	1	0.00944465
1732	2	48030525	Intron 4-5	G	A	-	13855	5	0.0360881
1733	2	48030525	Intron 4-5	G	C	rs56408691	13855	54	0.389751
1734	2	48030537	Intron 4-5	TT	-	-	10588	1	0.00944465
1735	2	48030543	Intron 4-5	C	T	rs551949725	2657	1	0.0376364
1736	2	48030544	Intron 4-5	CT	-	-	10588	1	0.00944465
1737	2	48030549	Intron 4-5	C	A	rs587780559	13855	10	0.0721761
1738	2	48030834	Intron 5-6	CTTA	-	-	13245	12	0.0906002
1739	2	48030838	Intron 5-6	A	T	rs2020911	14542	9680	66.5658
1740	2	48030841	Intron 5-6	-	T	-	10588	1	0.00944465
1741	2	48030848	Intron 5-6	T	A	-	610	1	0.163934
1742	2	48030853	Intron 5-6	G	C	-	10588	1	0.00944465
1743	2	48030857	Intron 5-6	G	C	rs200801405	10678	2	0.0187301
1744	2	48030878	Intron 5-6	A	G	-	13245	5	0.0377501
1745	2	48030878	Intron 5-6	A	T	-	10588	1	0.00944465
1746	2	48030883	Intron 5-6	A	G	-	10588	1	0.00944465
1747	2	48030884	Intron 5-6	C	T	-	10588	1	0.00944465
1748	2	48030893	Intron 5-6	T	C	-	10588	1	0.00944465
1749	2	48030895	Intron 5-6	A	G	-	2657	1	0.0376364
1750	2	48030915	Intron 5-6	AA	-	-	10588	1	0.00944465
1751	2	48030918	Intron 5-6	AGTCAGCC	-	-	13244	2	0.0151012
1752	2	48030918	Intron 5-6	AGTC	-	-	10587	1	0.00944555
1753	2	48030933	Intron 5-6	T	C	-	13245	3	0.0226501
1754	2	48030936	Intron 5-6	A	C	-	10588	6.5	0.0613903
1755	2	48030960	Intron 5-6	CT	-	-	13245	6.5	0.0490751
1756	2	48030993	Intron 5-6	G	A	-	10588	1	0.00944465
1757	2	48031000	Intron 5-6	C	T	rs3136352	13945	471.5	3.38114
1758	2	48031000	Intron 5-6	C	G	-	10588	1	0.00944465
1759	2	48031001	Intron 5-6	G	A	rs183372305	2747	2	0.0728067
1760	2	48031021	Intron 5-6	A	C	-	10588	1	0.00944465
1761	2	48031044	Intron 5-6	G	A	rs371764920	2657	2	0.0752729
1762	2	48031067	Intron 5-6	C	T	-	10588	1	0.00944465
1763	2	48031073	Intron 5-6	G	T	rs981346496	10588	1	0.00944465
1764	2	48031075	Intron 5-6	C	G	-	10588	1	0.00944465
1765	2	48031091	Intron 5-6	C	T	-	10588	1	0.00944465
1766	2	48031101	Intron 5-6	G	T	-	10588	1	0.00944465
1767	2	48031103	Intron 5-6	A	G	-	10588	1	0.00944465
1768	2	48031112	Intron 5-6	T	-	-	13245	7.5	0.0566251
1769	2	48031117	Intron 5-6	C	G	-	2657	2	0.0752729
1770	2	48031136	Intron 5-6	T	C	rs932360922	10588	1	0.00944465
1771	2	48031165	Intron 5-6	TTAAA	-	-	10588	1	0.00944465
1772	2	48031178	Intron 5-6	C	T	-	10588	1	0.00944465
1773	2	48031192	Intron 5-6	C	G	rs138853055	13335	43	0.32246
1774	2	48031199	Intron 5-6	G	A	rs572573564	90	1	1.11111
1775	2	48031209	Intron 5-6	C	G	rs375234171	13245	33.5	0.252926
1776	2	48031219	Intron 5-6	T	G	-	10588	1	0.00944465
1777	2	48031221	Intron 5-6	A	G	-	10588	1	0.00944465
1778	2	48031225	Intron 5-6	C	T	rs573723614	13245	12.5	0.0943752
1779	2	48031228	Intron 5-6	C	T	-	10588	1	0.00944465
1780	2	48031229	Intron 5-6	T	C	rs1013416046	10588	1	0.00944465
1781	2	48031253	Intron 5-6	T	G	-	10588	3	0.028334
1782	2	48031253	Intron 5-6	T	C	-	10588	1	0.00944465
1783	2	48031265	Intron 5-6	G	A	-	10588	1.5	0.014167
1784	2	48031272	Intron 5-6	-	T	rs373389467	2657	12	0.451637
1785	2	48031272	Intron 5-6	C	T	rs961562381	2657	6	0.225819
1786	2	48031273	Intron 5-6	TTTTTTTTTGTTG	-	-	2657	1	0.0376364
1787	2	48031280	Intron 5-6	T	G	rs2651765	2747	70	2.54823
1788	2	48031295	Intron 5-6	G	A	-	10588	1	0.00944465
1789	2	48031316	Intron 5-6	C	T	-	10588	1	0.00944465
1790	2	48031335	Intron 5-6	G	A	rs62139913	13245	7.5	0.0566251
1791	2	48031352	Intron 5-6	C	T	-	10588	1	0.00944465
1792	2	48031368	Intron 5-6	G	C	-	10588	1	0.00944465
1793	2	48031369	Intron 5-6	C	A	-	10588	1	0.00944465
1794	2	48031372	Intron 5-6	C	T	rs3136354	14542	11995	82.4852
1795	2	48031381	Intron 5-6	C	G	-	10588	1	0.00944465
1796	2	48031383	Intron 5-6	G	A	-	10588	1	0.00944465
1797	2	48031391	Intron 5-6	A	G	rs914717538	10588	1	0.00944465
1798	2	48031400	Intron 5-6	C	A	rs948811323	10588	1.5	0.014167
1799	2	48031420	Intron 5-6	T	C	-	10588	1	0.00944465
1800	2	48031421	Intron 5-6	T	A	rs3136355	13245	115.5	0.872027
1801	2	48031422	Intron 5-6	A	T	rs1053800261	13245	2	0.0151
1802	2	48031426	Intron 5-6	A	T	rs531637015	10588	1	0.00944465
1803	2	48031429	Intron 5-6	T	A	rs183092415	10588	1.5	0.014167
1804	2	48031439	Intron 5-6	C	T	-	2657	1	0.0376364
1805	2	48031456	Intron 5-6	C	T	-	10588	1	0.00944465
1806	2	48031464	Intron 5-6	C	T	-	10588	1	0.00944465
1807	2	48031469	Intron 5-6	G	A	-	10588	1	0.00944465
1808	2	48031495	Intron 5-6	-	T	-	10588	1	0.00944465
1809	2	48031503	Intron 5-6	T	C	-	10588	1	0.00944465
1810	2	48031505	Intron 5-6	T	C	-	10588	1	0.00944465
1811	2	48031518	Intron 5-6	G	C	-	10588	1	0.00944465
1812	2	48031520	Intron 5-6	A	G	-	10588	1	0.00944465
1813	2	48031545	Intron 5-6	C	T	rs369786153	2657	1	0.0376364
1814	2	48031547	Intron 5-6	C	G	-	10588	4.5	0.0425009
1815	2	48031547	Intron 5-6	C	T	rs773222342	10588	2	0.0188893
1816	2	48031548	Intron 5-6	G	A	rs965063631	10588	1	0.00944465
1817	2	48031559	Intron 5-6	G	A	-	10588	1	0.00944465
1818	2	48031564	Intron 5-6	A	G	-	10588	1	0.00944465
1819	2	48031575	Intron 5-6	C	T	-	10588	1	0.00944465
1820	2	48031581	Intron 5-6	CCTAGTTTGC	-	-	2657	3	0.112909
1821	2	48031584	Intron 5-6	T	G	-	10588	1	0.00944465
1822	2	48031600	Intron 5-6	G	C	-	10588	1	0.00944465
1823	2	48031606	Intron 5-6	A	G	-	13245	7	0.0528501
1824	2	48031616	Intron 5-6	T	C	-	2657	1	0.0376364
1825	2	48031620	Intron 5-6	G	A	rs60302527	13335	105.5	0.791151
1826	2	48031630	Intron 5-6	C	T	rs938710215	10588	1	0.00944465
1827	2	48031641	Intron 5-6	A	T	rs1037074510	2657	1	0.0376364
1828	2	48031648	Intron 5-6	A	T	-	10588	4	0.0377786
1829	2	48031650	Intron 5-6	C	T	-	10588	1	0.00944465
1830	2	48031654	Intron 5-6	GAAA	-	-	10588	1	0.00944465
1831	2	48031659	Intron 5-6	G	C	-	10588	1	0.00944465
1832	2	48031659	Intron 5-6	G	T	-	10588	1	0.00944465
1833	2	48031674	Intron 5-6	T	A	-	2657	6	0.225819
1834	2	48031674	Intron 5-6	A	-	-	2657	12	0.451637
1835	2	48031684	Intron 5-6	AAAAAG	-	-	2657	1	0.0376364
1836	2	48031688	Intron 5-6	AAG	-	rs58243978	610	1	0.163934
1837	2	48031689	Intron 5-6	A	T	-	2657	14	0.52691
1838	2	48031689	Intron 5-6	G	-	-	2657	122	4.59164
1839	2	48031689	Intron 5-6	AG	-	rs138593458	1207	6	0.4971
1840	2	48031690	Intron 5-6	G	A	rs72809591	1207	2	0.1657
1841	2	48031691	Intron 5-6	T	-	-	1638	1	0.0610501
1842	2	48031692	Intron 5-6	T	G	rs1054745946	2657	3	0.112909
1843	2	48031694	Intron 5-6	C	T	-	10588	1	0.00944465
1844	2	48031695	Intron 5-6	A	G	rs74533980	10588	4	0.0377786
1845	2	48031709	Intron 5-6	G	C	-	10588	1	0.00944465
1846	2	48031720	Intron 5-6	A	G	-	10588	1.5	0.014167
1847	2	48031725	Intron 5-6	A	G	-	10588	1	0.00944465
1848	2	48031727	Intron 5-6	T	A	rs372730931	13245	4	0.0302001
1849	2	48031735	Intron 5-6	A	G	-	10588	1	0.00944465
1850	2	48031745	Intron 5-6	T	C	-	10588	2.5	0.0236116
1851	2	48031762	Intron 5-6	A	G	-	2657	4	0.150546
1852	2	48031787	Intron 5-6	C	T	-	10588	1	0.00944465
1853	2	48031790	Intron 5-6	C	T	-	10588	1	0.00944465
1854	2	48031791	Intron 5-6	G	A	rs1023267527	13245	3	0.0226501
1855	2	48031807	Intron 5-6	TAGT	-	-	10588	1	0.00944465
1856	2	48031817	Intron 5-6	GT	-	-	2657	1	0.0376364
1857	2	48031860	Intron 5-6	G	A	-	10588	1	0.00944465
1858	2	48031869	Intron 5-6	C	T	-	13245	3	0.0226501
1859	2	48031871	Intron 5-6	C	T	-	10588	1	0.00944465
1860	2	48031877	Intron 5-6	G	A	-	10588	4	0.0377786
1861	2	48031883	Intron 5-6	A	G	rs757203381	10588	1	0.00944465
1862	2	48031885	Intron 5-6	T	C	-	10588	1	0.00944465
1863	2	48031911	Intron 5-6	A	G	-	10588	1	0.00944465
1864	2	48031913	Intron 5-6	A	C	-	90	1	1.11111
1865	2	48031915	Intron 5-6	C	T	-	10588	1	0.00944465
1866	2	48031924	Intron 5-6	C	T	rs139887193	10588	1	0.00944465
1867	2	48031924	Intron 5-6	C	G	rs139887193	10588	1	0.00944465
1868	2	48031925	Intron 5-6	G	A	rs999306481	10588	1	0.00944465
1869	2	48031936	Intron 5-6	T	A	-	10588	1	0.00944465
1870	2	48031942	Intron 5-6	A	G	-	10588	1	0.00944465
1871	2	48031944	Intron 5-6	T	C	-	2657	2	0.0752729
1872	2	48031968	Intron 5-6	C	T	rs183580632	10588	1	0.00944465
1873	2	48031969	Intron 5-6	-	T	-	10588	1	0.00944465
1874	2	48031970	Intron 5-6	A	-	-	10588	1.5	0.014167
1875	2	48031971	Intron 5-6	A	-	-	610	1	0.163934
1876	2	48031974	Intron 5-6	G	A	-	10588	1	0.00944465
1877	2	48031980	Intron 5-6	T	C	-	10588	1	0.00944465
1878	2	48031984	Intron 5-6	AAGAC	-	-	10588	1	0.00944465
1879	2	48032001	Intron 5-6	A	C	-	10588	1	0.00944465
1880	2	48032004	Intron 5-6	C	G	-	2657	1	0.0376364
1881	2	48032172	Intron 6-7	T	G	rs767210715	13855	3	0.0216528
1882	2	48032176	Intron 6-7	T	C	rs863224333	10588	1	0.00944465
1883	2	48032193	Intron 6-7	T	C	-	13245	3	0.0226501
1884	2	48032203	Intron 6-7	T	A	-	10588	1	0.00944465
1885	2	48032224	Intron 6-7	T	C	rs1011121387	10588	1	0.00944465
1886	2	48032225	Intron 6-7	A	G	rs56340593	13245	6	0.0453001
1887	2	48032241	Intron 6-7	T	A	-	2657	2	0.0752729
1888	2	48032255	Intron 6-7	C	T	-	10588	1	0.00944465
1889	2	48032264	Intron 6-7	G	T	-	10588	2	0.0188893
1890	2	48032270	Intron 6-7	C	-	-	10588	1	0.00944465
1891	2	48032274	Intron 6-7	G	A	-	10588	1	0.00944465
1892	2	48032278	Intron 6-7	T	A	-	10588	1	0.00944465
1893	2	48032280	Intron 6-7	C	A	rs56386437	13855	17	0.122699
1894	2	48032280	Intron 6-7	C	T	rs56386437	11198	14.5	0.129487
1895	2	48032280	Intron 6-7	C	G	-	10588	3	0.028334
1896	2	48032290	Intron 6-7	A	C	-	10588	1.5	0.014167
1897	2	48032304	Intron 6-7	A	G	-	10588	1.5	0.014167
1898	2	48032311	Intron 6-7	GT	-	-	13245	2.5	0.018875
1899	2	48032311	Intron 6-7	GTCT	-	-	13245	19.5	0.147225
1900	2	48032312	Intron 6-7	G	A	rs7562048	3954	2970	75.1138
1901	2	48032314	Intron 6-7	C	A	rs766349342	13245	2.5	0.018875
1902	2	48032316	Intron 6-7	C	A	rs752683820	13245	20.5	0.154775
1903	2	48032316	Intron 6-7	C	G	-	10588	1.5	0.014167
1904	2	48032320	Intron 6-7	C	T	-	2657	1	0.0376364
1905	2	48032320	Intron 6-7	TCTT	-	-	13245	4.5	0.0339751
1906	2	48032322	Intron 6-7	-	T	rs35781475	3267	57	1.74472
1907	2	48032322	Intron 6-7	C	T	-	2657	5	0.188182
1908	2	48032322	Intron 6-7	TT	-	-	2657	2	0.0752729
1909	2	48032323	Intron 6-7	-	C	-	3267	3	0.0918274
1910	2	48032323	Intron 7-8	T	-	rs879361707	610	14	2.29508
1911	2	48032323	Intron 7-8	TT	-	-	610	3	0.491803
1912	2	48032323	Intron 7-8	TTT	-	-	610	1	0.163934
1913	2	48032324	Intron 6-7	T	C	rs370995923	2657	2	0.0752729
1914	2	48032326	Intron 6-7	T	C	rs56320267	3357	34	1.01281
1915	2	48032349	Intron 6-7	C	A	-	10588	1	0.00944465
1916	2	48032355	Intron 6-7	T	A	rs904922041	10588	1	0.00944465
1917	2	48032376	Intron 6-7	A	G	rs112878668	10588	1	0.00944465
1918	2	48032383	Intron 6-7	G	A	rs1026259543	13855	43	0.310357
1919	2	48032385	Intron 6-7	T	C	-	10588	1	0.00944465
1920	2	48032389	Intron 6-7	G	A	-	13245	4	0.0302001
1921	2	48032401	Intron 6-7	C	A	-	10588	1.5	0.014167
1922	2	48032411	Intron 6-7	C	G	-	10588	1	0.00944465
1923	2	48032424	Intron 6-7	T	C	-	10588	5.5	0.0519456
1924	2	48032441	Intron 6-7	C	G	-	2657	1	0.0376364
1925	2	48032443	Intron 6-7	C	G	rs964063169	13245	9	0.0679502
1926	2	48032444	Intron 6-7	G	C	rs759790965	10588	1	0.00944465
1927	2	48032448	Intron 6-7	A	G	-	10588	1	0.00944465
1928	2	48032475	Intron 6-7	C	A	-	610	1	0.163934
1929	2	48032481	Intron 6-7	G	C	-	10588	4	0.0377786
1930	2	48032492	Intron 6-7	G	T	rs142189078	13245	7.5	0.0566251
1931	2	48032505	Intron 6-7	A	G	-	10588	1	0.00944465
1932	2	48032511	Intron 6-7	G	A	-	10588	1	0.00944465
1933	2	48032523	Intron 6-7	T	A	-	10588	3	0.028334
1934	2	48032531	Intron 6-7	G	C	-	10588	1	0.00944465
1935	2	48032540	Intron 6-7	C	G	-	10588	1	0.00944465
1936	2	48032545	Intron 6-7	G	C	-	2657	1	0.0376364
1937	2	48032554	Intron 6-7	T	C	-	10588	1	0.00944465
1938	2	48032560	Intron 6-7	G	C	-	10588	1	0.00944465
1939	2	48032572	Intron 6-7	C	T	rs3136357	10588	5.5	0.0519456
1940	2	48032597	Intron 6-7	G	A	-	10588	1	0.00944465
1941	2	48032597	Intron 6-7	G	T	-	10588	1	0.00944465
1942	2	48032602	Intron 6-7	C	A	-	610	1	0.163934
1943	2	48032606	Intron 6-7	C	T	-	10588	1	0.00944465
1944	2	48032610	Intron 6-7	C	T	-	10588	1	0.00944465
1945	2	48032612	Intron 6-7	C	T	rs181616549	10588	1	0.00944465
1946	2	48032613	Intron 6-7	G	A	rs7562367	14542	12153.5	83.5752
1947	2	48032614	Intron 6-7	G	A	-	10587	1	0.00944555
1948	2	48032621	Intron 6-7	A	G	-	13245	2	0.0151
1949	2	48032622	Intron 6-7	T	C	-	10588	1	0.00944465
1950	2	48032633	Intron 6-7	C	T	-	10588	2.5	0.0236116
1951	2	48032653	Intron 6-7	T	C	-	10588	1	0.00944465
1952	2	48032655	Intron 6-7	T	C	-	10588	1	0.00944465
1953	2	48032672	Intron 6-7	C	T	-	10588	1	0.00944465
1954	2	48032678	Intron 6-7	A	T	-	10588	1	0.00944465
1955	2	48032715	Intron 6-7	T	C	-	2657	1	0.0376364
1956	2	48032739	Intron 6-7	A	-	-	10588	2.5	0.0236116
1957	2	48032740	Intron 6-7	-	TT	rs546821964	2657	4	0.150546
1958	2	48032740	Intron 6-7	A	G	-	2657	4	0.150546
1959	2	48032740	Intron 6-7	A	T	rs542542093	2657	2	0.0752729
1960	2	48032740	Intron 6-7	TTTT	-	-	2657	1	0.0376364
1961	2	48032740	Intron 6-7	-	T	rs267608104	610	21	3.44262
1962	2	48032740	Intron 6-7	A	-	rs778393939	610	1	0.163934
1963	2	48032853	Intron 7-8	C	T	rs1057522750	10588	1	0.00944465
1964	2	48032860	Intron 7-8	C	G	-	10588	1	0.00944465
1965	2	48032874	Intron 7-8	CTAT	-	-	13245	11903.5	89.8716
1966	2	48032875	Intron 7-8	CTAT	-	rs2234731	1207	602	49.8757
1967	2	48032876	Intron 7-8	ATC	-	-	10588	1	0.00944465
1968	2	48032879	Intron 7-8	T	-	-	2103	2	0.0951022
1969	2	48032896	Intron 7-8	G	A	-	10588	1	0.00944465
1970	2	48032906	Intron 7-8	TA	-	-	13245	2	0.0151
1971	2	48032908	Intron 7-8	A	C	-	10588	1.5	0.014167
1972	2	48032928	Intron 7-8	G	T	-	10588	1	0.00944465
1973	2	48032935	Intron 7-8	A	C	rs554480624	13855	63	0.454709
1974	2	48032937	Intron 7-8	T	C	rs3136359	14452	12542.5	86.7873
1975	2	48032937	Intron 7-8	T	G	rs3136359	11198	125.5	1.12074
1976	2	48032942	Intron 7-8	C	T	rs891375563	2657	1	0.0376364
1977	2	48032947	Intron 7-8	T	G	-	10588	1	0.00944465
1978	2	48032951	Intron 7-8	-	G	-	10588	1	0.00944465
1979	2	48032952	Intron 7-8	G	C	-	10587	1	0.00944555
1980	2	48032964	Intron 7-8	C	T	rs576926262	13855	68	0.490798
1981	2	48032965	Intron 7-8	G	A	-	13245	2	0.0151
1982	2	48032967	Intron 7-8	A	G	-	13245	2	0.0151
1983	2	48032975	Intron 7-8	T	C	rs144047075	10588	1	0.00944465
1984	2	48032988	Intron 7-8	C	T	rs185858208	2657	1	0.0376364
1985	2	48032988	Intron 7-8	C	G	-	11198	3.5	0.0312556
1986	2	48032989	Intron 7-8	G	A	rs1026563286	13245	6.5	0.0490751
1987	2	48033003	Intron 7-8	A	C	-	10588	1	0.00944465
1988	2	48033011	Intron 7-8	T	C	rs984935426	10588	1	0.00944465
1989	2	48033016	Intron 7-8	T	G	-	2657	1	0.0376364
1990	2	48033031	Intron 7-8	T	G	-	2657	1	0.0376364
1991	2	48033035	Intron 7-8	ATTA	-	-	10588	1	0.00944465
1992	2	48033043	Intron 7-8	A	G	rs3136362	13245	4	0.0302001
1993	2	48033047	Intron 7-8	G	A	-	10588	1	0.00944465
1994	2	48033055	Intron 7-8	A	G	rs745893996	10588	1	0.00944465
1995	2	48033057	Intron 7-8	T	A	rs146443942	13245	6	0.0453001
1996	2	48033063	Intron 7-8	G	A	-	10588	1	0.00944465
1997	2	48033064	Intron 7-8	T	C	-	2657	1	0.0376364
1998	2	48033069	Intron 7-8	A	T	-	10588	2	0.0188893
[truncated: 54 more rows]

## Sheet: PMS2
Table S3D. Non-coding variants of PMS2 in general Chinese population
No.	Chr	Position	Mutation Type	Ref. (NM_000535.5)	Alt	dbSNP150	Case Number	Carrier Number	Carrier Rate (%)
1	7	6049914	UTR5	CACCA	-	-	10588	2	0.0188893
2	7	6048876	UTR5	-	T	rs558254312	10588	2	0.0188893
3	7	6048875	UTR5	C	T	-	10588	1	0.00944465
4	7	6048871	UTR5	C	-	-	10588	1	0.00944465
5	7	6048870	UTR5	G	T	-	10588	1	0.00944465
6	7	6048856	UTR5	A	G	-	10588	1	0.00944465
7	7	6048845	UTR5	A	G	rs2302336	10588	3634	34.3219
8	7	6048837	UTR5	C	T	-	10588	1.5	0.014167
9	7	6048820	UTR5	A	G	-	10588	1	0.00944465
10	7	6048812	UTR5	G	A	-	10588	1	0.00944465
11	7	6048804	UTR5	G	C	rs3735296	10588	838.5	7.91934
12	7	6048790	UTR5	GT	-	-	10588	1	0.00944465
13	7	6048765	UTR5	C	T	rs764420233	10588	1	0.00944465
14	7	6048764	UTR5	C	T	rs762941843	10588	1	0.00944465
15	7	6048618	Intron 1-2	C	G	rs192027828	2657	1	0.0376364
16	7	6048593	Intron 1-2	A	G	-	2657	1	0.0376364
17	7	6048556	Intron 1-2	G	A	rs3735295	13945	2586	18.5443
18	7	6048555	Intron 1-2	G	A	-	10588	2	0.0188893
19	7	6048542	Intron 1-2	C	T	-	10588	1	0.00944465
20	7	6048539	Intron 1-2	T	G	-	10588	1	0.00944465
21	7	6048538	Intron 1-2	G	T	-	10588	1	0.00944465
22	7	6048536	Intron 1-2	A	G	-	10588	1.5	0.014167
23	7	6048529	Intron 1-2	C	G	-	2657	1	0.0376364
24	7	6048527	Intron 1-2	G	A	-	10588	1	0.00944465
25	7	6048522	Intron 1-2	C	T	rs55652845	13335	76.5	0.573678
26	7	6048500	Intron 1-2	G	T	-	13245	12	0.0906002
27	7	6048490	Intron 1-2	G	A	-	10588	1	0.00944465
28	7	6048469	Intron 1-2	G	C	-	10588	3.5	0.0330563
29	7	6048462	Intron 1-2	G	C	rs550092647	10588	1	0.00944465
30	7	6048459	Intron 1-2	G	-	-	10588	1	0.00944465
31	7	6048438	Intron 1-2	C	G	-	13245	4.5	0.0339751
32	7	6048431	Intron 1-2	A	G	-	10588	2	0.0188893
33	7	6048407	Intron 1-2	G	C	-	10588	1.5	0.014167
34	7	6048392	Intron 1-2	-	G	-	10588	1	0.00944465
35	7	6048374	Intron 1-2	C	A	-	10588	1	0.00944465
36	7	6048367	Intron 1-2	G	A	rs547956577	13335	401.5	3.01087
37	7	6048366	Intron 1-2	G	C	rs912585893	2657	177	6.66165
38	7	6048364	Intron 1-2	TG	-	-	10588	223	2.10616
39	7	6048364	Intron 1-2	TGGG	-	-	10588	4	0.0377786
40	7	6048362	Intron 1-2	TCT	-	-	2657	177	6.66165
41	7	6048362	Intron 1-2	T	-	-	10588	223	2.10616
42	7	6048359	Intron 1-2	C	T	rs12702466	13331	2579.5	19.3496
43	7	6048265	Intron 1-2	G	C	-	10588	1	0.00944465
44	7	6048245	Intron 1-2	T	C	-	2657	8	0.301091
45	7	6048218	Intron 1-2	-	A	rs912531856	2657	1	0.0376364
46	7	6048217	Intron 1-2	A	G	-	2657	3	0.112909
47	7	6048197	Intron 1-2	G	A	-	10588	3.5	0.0330563
48	7	6048186	Intron 1-2	G	C	rs7803118	13335	2581	19.3551
49	7	6048163	Intron 1-2	T	G	-	10588	1	0.00944465
50	7	6048152	Intron 1-2	G	C	-	10588	1	0.00944465
51	7	6048151	Intron 1-2	C	T	-	2657	1	0.0376364
52	7	6048114	Intron 1-2	A	C	-	10588	1.5	0.014167
53	7	6048088	Intron 1-2	T	A	-	13244	5.5	0.0415282
54	7	6048087	Intron 1-2	-	T	-	10588	1.5	0.014167
55	7	6048076	Intron 1-2	A	T	-	10588	1	0.00944465
56	7	6048048	Intron 1-2	G	C	-	10588	2	0.0188893
57	7	6048038	Intron 1-2	T	C	-	10588	1	0.00944465
58	7	6048035	Intron 1-2	C	G	-	10588	1.5	0.014167
59	7	6048012	Intron 1-2	T	C	rs554268167	13245	8.5	0.0641752
60	7	6048009	Intron 1-2	G	A	-	10588	1	0.00944465
61	7	6048002	Intron 1-2	T	A	-	10588	2	0.0188893
62	7	6047985	Intron 1-2	T	C	rs1052340977	10588	1	0.00944465
63	7	6047967	Intron 1-2	T	C	rs118173955	10588	1.5	0.014167
64	7	6047955	Intron 1-2	C	T	-	2657	1	0.0376364
65	7	6047953	Intron 1-2	G	C	-	10588	1	0.00944465
66	7	6047951	Intron 1-2	T	C	-	10588	1	0.00944465
67	7	6047939	Intron 1-2	A	T	-	10588	1	0.00944465
68	7	6047925	Intron 1-2	A	C	-	10588	1	0.00944465
69	7	6047887	Intron 1-2	C	G	-	10588	1	0.00944465
70	7	6047838	Intron 1-2	A	G	-	10588	1	0.00944465
71	7	6047821	Intron 1-2	T	A	rs537800552	10588	1	0.00944465
72	7	6047803	Intron 1-2	T	A	-	10588	1	0.00944465
73	7	6047797	Intron 1-2	T	C	-	10588	1	0.00944465
74	7	6047785	Intron 1-2	G	A	-	10588	1	0.00944465
75	7	6047776	Intron 1-2	C	G	-	10588	1	0.00944465
76	7	6047762	Intron 1-2	A	G	-	2657	1	0.0376364
77	7	6047748	Intron 1-2	A	G	-	10588	1	0.00944465
78	7	6047742	Intron 1-2	C	G	rs566938872	13245	8	0.0604002
79	7	6047681	Intron 1-2	G	C	-	10588	1	0.00944465
80	7	6047664	Intron 1-2	T	C	-	10588	1	0.00944465
81	7	6047650	Intron 1-2	C	T	-	2657	1	0.0376364
82	7	6047640	Intron 1-2	G	A	-	10588	1	0.00944465
83	7	6047638	Intron 1-2	C	T	-	10588	3	0.028334
84	7	6047626	Intron 1-2	G	C	-	10588	1	0.00944465
85	7	6047602	Intron 1-2	T	C	-	10588	1	0.00944465
86	7	6047601	Intron 1-2	C	T	-	2657	1	0.0376364
87	7	6047583	Intron 1-2	T	A	-	10588	1	0.00944465
88	7	6047579	Intron 1-2	C	T	rs532137197	10588	3.5	0.0330563
89	7	6047576	Intron 1-2	C	T	rs111277664	13335	389	2.91714
90	7	6047553	Intron 1-2	C	T	-	10588	1	0.00944465
91	7	6047539	Intron 1-2	G	C	-	10588	1	0.00944465
92	7	6047531	Intron 1-2	C	A	-	10588	1	0.00944465
93	7	6047527	Intron 1-2	G	T	-	10588	1	0.00944465
94	7	6047524	Intron 1-2	T	C	-	10588	1	0.00944465
95	7	6047520	Intron 1-2	T	G	-	10588	1	0.00944465
96	7	6047515	Intron 1-2	G	A	-	10588	1	0.00944465
97	7	6047508	Intron 1-2	T	G	-	2657	11	0.414001
98	7	6047470	Intron 1-2	C	T	rs528320848	10588	6	0.0566679
99	7	6047463	Intron 1-2	C	G	-	10588	1	0.00944465
100	7	6047462	Intron 1-2	A	G	-	13245	29	0.218951
101	7	6047435	Intron 1-2	T	C	-	90	1	1.11111
102	7	6047431	Intron 1-2	T	G	rs542383287	10588	2.5	0.0236116
103	7	6047423	Intron 1-2	-	A	-	10588	1	0.00944465
104	7	6047410	Intron 1-2	C	G	-	10588	1	0.00944465
105	7	6047386	Intron 1-2	C	G	-	10588	1	0.00944465
106	7	6047362	Intron 1-2	G	A	-	10588	1	0.00944465
107	7	6047358	Intron 1-2	C	T	-	10588	1	0.00944465
108	7	6047346	Intron 1-2	C	T	-	10588	1.5	0.014167
109	7	6047304	Intron 1-2	T	C	-	2657	2	0.0752729
110	7	6047289	Intron 1-2	G	A	-	10588	1	0.00944465
111	7	6047277	Intron 1-2	G	C	-	10588	1	0.00944465
112	7	6047277	Intron 1-2	G	T	rs1033499479	10588	1	0.00944465
113	7	6047240	Intron 1-2	A	T	-	10588	1	0.00944465
114	7	6047239	Intron 1-2	G	C	-	10588	1	0.00944465
115	7	6047234	Intron 1-2	G	A	-	10588	1	0.00944465
116	7	6047224	Intron 1-2	T	C	rs555204139	10588	1	0.00944465
117	7	6047196	Intron 1-2	A	C	-	10588	1	0.00944465
118	7	6047183	Intron 1-2	C	T	rs1056424023	10588	6.5	0.0613903
119	7	6047180	Intron 1-2	T	C	-	2657	1	0.0376364
120	7	6047166	Intron 1-2	G	A	-	10588	1	0.00944465
121	7	6047153	Intron 1-2	CAAA	-	-	10588	1	0.00944465
122	7	6047145	Intron 1-2	T	G	rs550695312	13245	7	0.0528501
123	7	6047135	Intron 1-2	C	G	rs191289375	10588	1	0.00944465
124	7	6047133	Intron 1-2	C	T	-	10588	1	0.00944465
125	7	6047131	Intron 1-2	C	T	rs7799214	13335	1140.5	8.55268
126	7	6047125	Intron 1-2	C	G	-	2657	1	0.0376364
127	7	6047119	Intron 1-2	C	G	-	2657	1	0.0376364
128	7	6047109	Intron 1-2	A	T	-	10588	1	0.00944465
129	7	6047107	Intron 1-2	G	A	-	10588	1	0.00944465
130	7	6047103	Intron 1-2	C	T	-	10588	1	0.00944465
131	7	6047074	Intron 1-2	C	G	-	10588	1	0.00944465
132	7	6047063	Intron 1-2	G	A	-	10588	1.5	0.014167
133	7	6047051	Intron 1-2	T	C	-	10588	1	0.00944465
134	7	6047032	Intron 1-2	C	T	-	10588	1	0.00944465
135	7	6047010	Intron 1-2	G	A	-	10588	1.5	0.014167
136	7	6046998	Intron 1-2	C	T	-	10588	1	0.00944465
137	7	6046990	Intron 1-2	G	A	rs113279793	13335	397.5	2.98088
138	7	6046985	Intron 1-2	G	A	-	10588	1	0.00944465
139	7	6046968	Intron 1-2	A	C	-	10588	1.5	0.014167
140	7	6046962	Intron 1-2	G	A	-	10588	1	0.00944465
141	7	6046957	Intron 1-2	G	A	rs562688108	10588	5.5	0.0519456
142	7	6046956	Intron 1-2	A	T	-	610	1	0.163934
143	7	6046948	Intron 1-2	T	C	-	10588	1	0.00944465
144	7	6046939	Intron 1-2	G	A	-	13245	5	0.0377501
145	7	6046935	Intron 1-2	T	C	-	2657	1	0.0376364
146	7	6046916	Intron 1-2	T	A	-	2657	1	0.0376364
147	7	6046910	Intron 1-2	C	G	-	10588	1	0.00944465
148	7	6046874	Intron 1-2	G	A	-	10588	2.5	0.0236116
149	7	6046859	Intron 1-2	A	G	rs369212352	13335	84	0.629921
150	7	6046850	Intron 1-2	G	A	-	10588	1	0.00944465
151	7	6046790	Intron 1-2	A	G	rs1016847085	10588	1	0.00944465
152	7	6046783	Intron 1-2	G	A	rs7797466	13335	2583	19.3701
153	7	6046782	Intron 1-2	C	T	-	10588	2	0.0188893
154	7	6046755	Intron 1-2	G	A	rs28645981	90	1	1.11111
155	7	6046746	Intron 1-2	G	A	rs28460012	2747	70	2.54823
156	7	6046737	Intron 1-2	-	TTATTG	rs531672241	2657	40	1.50546
157	7	6046737	Intron 1-2	A	G	-	2657	12	0.451637
158	7	6046733	Intron 1-2	-	A	-	2657	1	0.0376364
159	7	6046719	Intron 1-2	ATT	-	rs10592354	610	1	0.163934
160	7	6046718	Intron 1-2	-	ATTATTATT	-	2657	30	1.12909
161	7	6046718	Intron 1-2	-	ATTATTATTATT	rs900807824	2657	136	5.11855
162	7	6046718	Intron 1-2	-	ATT	rs775201333	610	1	0.163934
163	7	6046702	Intron 1-2	TCA	-	-	13245	2	0.0151
164	7	6046655	Intron 1-2	T	C	rs751649385	10588	1	0.00944465
165	7	6046635	Intron 1-2	A	G	-	13245	14.5	0.109475
166	7	6046631	Intron 1-2	A	C	-	2657	2	0.0752729
167	7	6046577	Intron 1-2	C	G	-	13245	16	0.1208
168	7	6046574	Intron 1-2	A	T	-	10588	1	0.00944465
169	7	6046572	Intron 1-2	C	G	-	10588	2	0.0188893
170	7	6046564	Intron 1-2	T	C	-	2657	1	0.0376364
171	7	6046564	Intron 1-2	T	A	-	10588	1	0.00944465
172	7	6046534	Intron 1-2	C	T	rs753821666	10588	1	0.00944465
173	7	6046531	Intron 1-2	A	G	-	10588	1	0.00944465
174	7	6046515	Intron 1-2	C	T	-	2657	1	0.0376364
175	7	6046498	Intron 1-2	T	C	-	10588	1	0.00944465
176	7	6046477	Intron 1-2	G	A	rs147261211	13335	536.5	4.02325
177	7	6046462	Intron 1-2	C	G	-	10588	1	0.00944465
178	7	6046447	Intron 1-2	G	A	-	10588	1	0.00944465
179	7	6046437	Intron 1-2	G	C	-	10588	1	0.00944465
180	7	6046400	Intron 1-2	C	G	rs540312765	13245	2	0.0151
181	7	6046388	Intron 1-2	C	G	-	10588	1	0.00944465
182	7	6046363	Intron 1-2	C	A	-	10588	1	0.00944465
183	7	6046341	Intron 1-2	A	G	-	10588	1.5	0.014167
184	7	6046338	Intron 1-2	C	T	-	10588	5	0.0472233
185	7	6046304	Intron 1-2	A	C	-	10588	1	0.00944465
186	7	6046298	Intron 1-2	C	G	-	10588	1	0.00944465
187	7	6046284	Intron 1-2	A	C	-	10588	1	0.00944465
188	7	6046269	Intron 1-2	-	A	rs572230979	2657	495	18.63
189	7	6046268	Intron 1-2	G	A	-	2657	37	1.39255
190	7	6046266	Intron 1-2	G	A	-	2657	35	1.31728
191	7	6046256	Intron 1-2	C	T	-	2657	2	0.0752729
192	7	6046235	Intron 1-2	G	A	-	10588	1	0.00944465
193	7	6046231	Intron 1-2	C	G	-	10588	1	0.00944465
194	7	6046219	Intron 1-2	G	A	-	10588	1	0.00944465
195	7	6046216	Intron 1-2	G	A	-	10588	1	0.00944465
196	7	6046198	Intron 1-2	C	T	-	10588	1	0.00944465
197	7	6046188	Intron 1-2	G	T	rs185443834	13245	2	0.0151
198	7	6046174	Intron 1-2	C	T	-	13245	6	0.0453001
199	7	6046159	Intron 1-2	C	T	-	10588	1	0.00944465
200	7	6046143	Intron 1-2	G	C	-	10588	1	0.00944465
201	7	6046134	Intron 1-2	A	C	-	2657	1	0.0376364
202	7	6046113	Intron 1-2	T	C	-	10588	3	0.028334
203	7	6046109	Intron 1-2	C	T	-	10588	1	0.00944465
204	7	6046085	Intron 1-2	C	G	-	10588	1	0.00944465
205	7	6046084	Intron 1-2	A	T	-	10588	1	0.00944465
206	7	6046081	Intron 1-2	G	A	-	10588	1	0.00944465
207	7	6046075	Intron 1-2	G	A	-	10588	1	0.00944465
208	7	6046073	Intron 1-2	A	G	-	10588	1.5	0.014167
209	7	6046068	Intron 1-2	A	T	-	10588	1	0.00944465
210	7	6046049	Intron 1-2	G	C	-	13245	14	0.1057
211	7	6046030	Intron 1-2	C	T	-	10588	1	0.00944465
212	7	6045986	Intron 1-2	G	T	-	10588	1.5	0.014167
213	7	6045934	Intron 1-2	T	C	rs12702465	13945	1148.5	8.23593
214	7	6045930	Intron 1-2	T	C	-	2657	1	0.0376364
215	7	6045929	Intron 1-2	A	G	-	10588	1	0.00944465
216	7	6045921	Intron 1-2	G	A	-	10588	1	0.00944465
217	7	6045905	Intron 1-2	T	C	-	10588	1	0.00944465
218	7	6045881	Intron 1-2	C	T	rs1860462	13335	1142.5	8.56768
219	7	6045874	Intron 1-2	T	C	rs565285932	13842	113	0.816356
220	7	6045872	Intron 1-2	C	T	-	10588	1	0.00944465
221	7	6045838	Intron 1-2	T	G	-	10588	1	0.00944465
222	7	6045826	Intron 1-2	G	A	-	10588	1	0.00944465
223	7	6045785	Intron 1-2	T	C	-	2657	1	0.0376364
224	7	6045783	Intron 1-2	T	C	rs543013213	10588	1	0.00944465
225	7	6045774	Intron 1-2	T	C	-	10588	1	0.00944465
226	7	6045764	Intron 1-2	TC	-	-	10588	1	0.00944465
227	7	6045745	Intron 1-2	C	T	-	10588	1	0.00944465
228	7	6045717	Intron 1-2	C	T	-	10588	1	0.00944465
229	7	6045716	Intron 1-2	C	T	-	10588	1	0.00944465
230	7	6045687	Intron 1-2	A	T	-	2657	1	0.0376364
231	7	6045665	Intron 1-2	A	G	rs749485884	10588	2.5	0.0236116
232	7	6045497	Intron 2-3	G	A	-	10588	1	0.00944465
233	7	6045479	Intron 2-3	A	G	-	2657	1	0.0376364
234	7	6045478	Intron 2-3	C	A	rs547243921	10588	1	0.00944465
235	7	6045470	Intron 2-3	ACA	-	-	2657	1	0.0376364
236	7	6045446	Intron 2-3	T	C	-	10588	1	0.00944465
237	7	6045431	Intron 2-3	C	T	-	10588	1.5	0.014167
238	7	6045414	Intron 2-3	A	C	-	10588	1	0.00944465
239	7	6045385	Intron 2-3	T	C	rs62456183	13335	5776	43.3146
240	7	6045382	Intron 2-3	T	C	-	10588	1	0.00944465
241	7	6045371	Intron 2-3	T	C	rs530915767	10588	1	0.00944465
242	7	6045365	Intron 2-3	G	C	-	10588	1	0.00944465
243	7	6045349	Intron 2-3	T	C	-	10588	1	0.00944465
244	7	6045346	Intron 2-3	T	C	rs914427183	10588	1	0.00944465
245	7	6045345	Intron 2-3	G	A	rs564017230	10588	1	0.00944465
246	7	6045343	Intron 2-3	C	A	-	10588	1	0.00944465
247	7	6045341	Intron 2-3	GCT	-	-	10588	1	0.00944465
248	7	6045328	Intron 2-3	A	T	-	10588	1	0.00944465
249	7	6045297	Intron 2-3	T	C	-	10588	1	0.00944465
250	7	6045271	Intron 2-3	C	G	-	10588	1.5	0.014167
251	7	6045271	Intron 2-3	C	T	-	10588	1	0.00944465
252	7	6045266	Intron 2-3	C	A	-	10588	1	0.00944465
253	7	6045260	Intron 2-3	G	A	-	2657	1	0.0376364
254	7	6045252	Intron 2-3	G	C	-	10588	1	0.00944465
255	7	6045248	Intron 2-3	G	A	-	2657	1	0.0376364
256	7	6045247	Intron 2-3	C	T	-	2657	1	0.0376364
257	7	6045244	Intron 2-3	G	-	-	10588	1	0.00944465
258	7	6045243	Intron 2-3	T	C	-	10588	1	0.00944465
259	7	6045222	Intron 2-3	C	A	-	13245	14	0.1057
260	7	6045220	Intron 2-3	G	A	rs35657389	10678	13	0.121746
261	7	6045219	Intron 2-3	C	T	-	10588	1	0.00944465
262	7	6045211	Intron 2-3	C	G	-	10588	1.5	0.014167
263	7	6045204	Intron 2-3	G	A	rs144716871	13245	2	0.0151
264	7	6045193	Intron 2-3	C	T	-	10588	1	0.00944465
265	7	6045188	Intron 2-3	G	A	-	10588	1	0.00944465
266	7	6045170	Intron 2-3	G	T	-	10588	1	0.00944465
267	7	6045125	Intron 2-3	A	G	-	10588	1	0.00944465
268	7	6045115	Intron 2-3	G	A	rs984979030	10588	1	0.00944465
269	7	6045105	Intron 2-3	G	T	rs146433026	10588	1	0.00944465
270	7	6045082	Intron 2-3	G	A	rs975313923	10588	1.5	0.014167
271	7	6045024	Intron 2-3	AG	-	-	10588	1	0.00944465
272	7	6045015	Intron 2-3	T	C	-	13245	15	0.11325
273	7	6045011	Intron 2-3	T	C	-	10588	1	0.00944465
274	7	6044997	Intron 2-3	A	G	-	10588	1	0.00944465
275	7	6044992	Intron 2-3	G	C	rs544895333	13245	16	0.1208
276	7	6044989	Intron 2-3	C	T	-	10588	3.5	0.0330563
277	7	6044981	Intron 2-3	T	A	-	10588	1	0.00944465
278	7	6044946	Intron 2-3	G	A	-	10588	1	0.00944465
279	7	6044931	Intron 2-3	C	G	-	2657	1	0.0376364
280	7	6044928	Intron 2-3	C	T	rs547556016	10588	1	0.00944465
281	7	6044922	Intron 2-3	G	A	-	10588	1	0.00944465
282	7	6044905	Intron 2-3	G	A	rs150287669	10588	1	0.00944465
283	7	6044899	Intron 2-3	G	A	rs140403457	10588	1.5	0.014167
284	7	6044880	Intron 2-3	G	A	-	10588	1	0.00944465
285	7	6044873	Intron 2-3	G	A	-	10588	1	0.00944465
286	7	6044872	Intron 2-3	T	C	rs909917404	10588	5.5	0.0519456
287	7	6044837	Intron 2-3	TTTTG	-	-	10588	1	0.00944465
288	7	6044751	Intron 2-3	G	C	rs559757313	2657	2	0.0752729
289	7	6044747	Intron 2-3	G	T	rs547625084	13245	3.5	0.0264251
290	7	6044733	Intron 2-3	A	G	rs529443818	13335	7.5	0.056243
291	7	6044733	Intron 2-3	A	T	-	10588	1	0.00944465
292	7	6044727	Intron 2-3	G	A	-	10588	1	0.00944465
293	7	6044720	Intron 2-3	G	C	-	10588	1	0.00944465
294	7	6044656	Intron 2-3	G	A	rs906999003	10588	1	0.00944465
295	7	6044655	Intron 2-3	C	T	-	2657	1	0.0376364
296	7	6044650	Intron 2-3	T	C	rs12538339	14542	12493.5	85.9132
297	7	6044624	Intron 2-3	C	T	-	10588	2	0.0188893
298	7	6044622	Intron 2-3	A	G	-	10588	1	0.00944465
299	7	6044598	Intron 2-3	C	T	-	10588	1	0.00944465
300	7	6044571	Intron 2-3	C	T	rs372161513	13245	8.5	0.0641752
301	7	6044563	Intron 2-3	G	C	-	10588	1	0.00944465
302	7	6044528	Intron 2-3	T	A	rs148674986	2657	12	0.451637
303	7	6044521	Intron 2-3	T	G	rs6978310	13945	2714.5	19.4658
304	7	6044520	Intron 2-3	G	T	rs553771005	13245	2	0.0151
305	7	6044518	Intron 2-3	-	G	-	10588	1	0.00944465
306	7	6044515	Intron 2-3	C	T	rs6954766	14452	12239	84.6872
307	7	6044507	Intron 2-3	T	G	-	10588	1	0.00944465
308	7	6044489	Intron 2-3	T	C	-	10588	5	0.0472233
309	7	6044465	Intron 2-3	T	C	rs1027337573	10588	1.5	0.014167
310	7	6044457	Intron 2-3	T	G	-	2657	1	0.0376364
311	7	6044441	Intron 2-3	C	G	rs574662913	10678	2	0.0187301
312	7	6044433	Intron 2-3	T	C	-	13245	13	0.0981502
313	7	6044428	Intron 2-3	G	A	rs77314273	10588	12	0.113336
314	7	6044401	Intron 2-3	T	G	-	10588	1	0.00944465
315	7	6044369	Intron 2-3	T	C	-	13245	3	0.0226501
316	7	6044367	Intron 2-3	A	C	-	2657	1	0.0376364
317	7	6044347	Intron 2-3	A	-	rs560361972	610	1	0.163934
318	7	6044331	Intron 2-3	A	G	-	10588	1	0.00944465
319	7	6044320	Intron 2-3	T	C	rs1053841203	10588	1	0.00944465
320	7	6044315	Intron 2-3	T	C	rs539441868	13245	11	0.0830502
321	7	6044301	Intron 2-3	G	A	rs372321408	10588	1	0.00944465
322	7	6044292	Intron 2-3	G	A	-	10588	1	0.00944465
323	7	6044287	Intron 2-3	A	G	-	10588	1	0.00944465
324	7	6044285	Intron 2-3	G	A	-	10588	1	0.00944465
325	7	6044269	Intron 2-3	C	T	-	10588	2	0.0188893
326	7	6044251	Intron 2-3	C	T	rs561963571	13334	12	0.0899955
327	7	6044238	Intron 2-3	C	G	-	10588	1	0.00944465
328	7	6044234	Intron 2-3	T	C	-	10588	2	0.0188893
329	7	6044227	Intron 2-3	T	A	-	10588	1	0.00944465
330	7	6044214	Intron 2-3	C	T	-	10588	1.5	0.014167
331	7	6044206	Intron 2-3	C	T	-	10588	1	0.00944465
332	7	6044198	Intron 2-3	T	C	-	10588	1	0.00944465
333	7	6044155	Intron 2-3	T	C	-	13245	3	0.0226501
334	7	6044117	Intron 2-3	C	G	rs531441060	13245	26.5	0.200076
335	7	6044117	Intron 2-3	C	T	-	10588	2	0.0188893
336	7	6044104	Intron 2-3	T	C	-	10588	1	0.00944465
337	7	6044084	Intron 2-3	T	A	-	10588	1	0.00944465
338	7	6044068	Intron 2-3	C	T	rs973204221	10588	1	0.00944465
339	7	6044067	Intron 2-3	C	T	-	10588	1	0.00944465
340	7	6044061	Intron 2-3	C	T	-	10588	1	0.00944465
341	7	6044049	Intron 2-3	C	G	-	10588	1	0.00944465
342	7	6044034	Intron 2-3	T	C	-	10588	1	0.00944465
343	7	6044025	Intron 2-3	T	C	-	10588	1	0.00944465
344	7	6044003	Intron 2-3	C	T	-	10588	1.5	0.014167
345	7	6043998	Intron 2-3	C	T	rs894059605	10588	4	0.0377786
346	7	6043997	Intron 2-3	G	A	rs368069996	13245	2	0.0151
347	7	6043985	Intron 2-3	T	G	-	10588	1	0.00944465
348	7	6043964	Intron 2-3	TG	-	-	13245	2700	20.3851
349	7	6043932	Intron 2-3	A	C	-	10588	1	0.00944465
350	7	6043880	Intron 2-3	G	A	-	10588	1	0.00944465
351	7	6043860	Intron 2-3	T	C	-	2657	2	0.0752729
352	7	6043849	Intron 2-3	T	C	-	10588	1	0.00944465
353	7	6043837	Intron 2-3	G	A	-	10588	1	0.00944465
354	7	6043827	Intron 2-3	A	G	-	10588	1	0.00944465
355	7	6043809	Intron 2-3	T	-	-	10588	1	0.00944465
356	7	6043797	Intron 2-3	C	G	rs12538294	13932	5079	36.4556
357	7	6043779	Intron 2-3	AA	-	-	10588	1	0.00944465
358	7	6043746	Intron 2-3	T	A	-	10588	1	0.00944465
359	7	6043736	Intron 2-3	C	T	-	10588	1	0.00944465
360	7	6043732	Intron 2-3	C	G	-	10588	1.5	0.014167
361	7	6043727	Intron 2-3	G	T	-	10588	1.5	0.014167
362	7	6043726	Intron 2-3	C	T	rs767206047	13245	11	0.0830502
363	7	6043595	Intron 3-4	C	A	-	10588	1	0.00944465
364	7	6043587	Intron 3-4	AA	-	-	10588	1	0.00944465
365	7	6043579	Intron 3-4	T	C	rs370191165	13245	102.5	0.773877
366	7	6043576	Intron 3-4	T	C	-	10588	1	0.00944465
367	7	6043557	Intron 3-4	A	G	rs769787542	10588	2	0.0188893
368	7	6043542	Intron 3-4	T	C	-	10588	1	0.00944465
369	7	6043521	Intron 3-4	C	G	-	10588	1	0.00944465
370	7	6043495	Intron 3-4	T	C	rs117831773	13245	5	0.0377501
371	7	6043489	Intron 3-4	A	G	-	10588	1	0.00944465
372	7	6043485	Intron 3-4	T	C	-	10588	1	0.00944465
373	7	6043464	Intron 3-4	G	A	rs541817503	10588	2	0.0188893
374	7	6043453	Intron 3-4	A	G	-	2657	1	0.0376364
375	7	6043317	Intron 4-5	T	C	rs760538709	10588	1	0.00944465
376	7	6043296	Intron 4-5	T	C	-	10588	1	0.00944465
377	7	6043284	Intron 4-5	T	A	-	10588	1	0.00944465
378	7	6043262	Intron 4-5	T	A	-	10588	5.5	0.0519456
379	7	6043225	Intron 4-5	T	C	-	10588	1	0.00944465
380	7	6043219	Intron 4-5	T	C	rs553755505	10588	1.5	0.014167
381	7	6043196	Intron 4-5	A	C	rs535420607	10588	2	0.0188893
382	7	6043167	Intron 4-5	G	T	-	10588	1.5	0.014167
383	7	6043153	Intron 4-5	C	T	-	10588	1	0.00944465
384	7	6043144	Intron 4-5	C	A	-	2657	1	0.0376364
385	7	6043140	Intron 4-5	ATTCATTT	-	-	10588	1	0.00944465
386	7	6043117	Intron 4-5	T	A	-	10588	1	0.00944465
387	7	6043112	Intron 4-5	C	T	rs6463526	14542	11077	76.1725
388	7	6043108	Intron 4-5	C	A	-	2657	1	0.0376364
389	7	6043103	Intron 4-5	G	T	-	10588	1	0.00944465
390	7	6043102	Intron 4-5	G	C	-	10588	1	0.00944465
391	7	6043073	Intron 4-5	G	C	-	10588	1	0.00944465
392	7	6043065	Intron 4-5	C	T	rs12537608	14542	5079	34.9264
393	7	6043057	Intron 4-5	A	G	rs6463525	13945	1150.5	8.25027
394	7	6043041	Intron 4-5	A	G	-	13245	2	0.0151
395	7	6043025	Intron 4-5	T	C	-	10588	2	0.0188893
396	7	6043006	Intron 4-5	T	A	-	10588	1	0.00944465
397	7	6042976	Intron 4-5	T	C	-	10588	1	0.00944465
398	7	6042955	Intron 4-5	-	AA	rs559526418	2657	4	0.150546
399	7	6042955	Intron 4-5	-	ATATATACATATAA	-	2657	1	0.0376364
400	7	6042955	Intron 4-5	T	A	rs190622317	90	1	1.11111
401	7	6042949	Intron 4-5	T	C	-	2657	2	0.0752729
402	7	6042939	Intron 4-5	T	G	-	2657	1	0.0376364
403	7	6042937	Intron 4-5	-	ATAT	-	2657	27	1.01618
404	7	6042937	Intron 4-5	AT	-	-	2657	307	11.5544
405	7	6042937	Intron 4-5	G	T	rs199961812	90	1	1.11111
406	7	6042935	Intron 4-5	-	AAG	-	2657	14	0.52691
407	7	6042935	Intron 4-5	A	T	-	90	1	1.11111
408	7	6042930	Intron 4-5	A	G	rs7788051	2747	306	11.1394
409	7	6042923	Intron 4-5	T	A	-	2657	4	0.150546
410	7	6042923	Intron 4-5	-	A	-	2657	9	0.338728
411	7	6042923	Intron 4-5	A	-	-	2657	21	0.790365
412	7	6042916	Intron 4-5	C	T	-	10588	1	0.00944465
413	7	6042914	Intron 4-5	G	C	-	10588	1	0.00944465
414	7	6042877	Intron 4-5	A	T	-	10588	1.5	0.014167
415	7	6042864	Intron 4-5	G	A	-	10588	1	0.00944465
416	7	6042854	Intron 4-5	G	A	-	13245	14	0.1057
417	7	6042848	Intron 4-5	C	G	-	10588	1	0.00944465
418	7	6042770	Intron 4-5	C	T	rs947835078	10588	1	0.00944465
419	7	6042703	Intron 4-5	T	C	-	10588	1	0.00944465
420	7	6042660	Intron 4-5	C	T	-	10588	1	0.00944465
421	7	6042658	Intron 4-5	C	G	-	2657	1	0.0376364
422	7	6042651	Intron 4-5	G	A	rs61298923	14542	5075	34.8989
423	7	6042635	Intron 4-5	A	G	rs118162198	13245	5	0.0377501
424	7	6042619	Intron 4-5	A	T	-	10588	1	0.00944465
425	7	6042609	Intron 4-5	T	C	-	10588	1	0.00944465
426	7	6042594	Intron 4-5	A	T	-	13245	5.5	0.0415251
427	7	6042588	Intron 4-5	G	T	-	10588	1	0.00944465
428	7	6042587	Intron 4-5	C	A	-	10588	1	0.00944465
429	7	6042584	Intron 4-5	C	G	-	10588	1	0.00944465
430	7	6042522	Intron 4-5	C	T	rs11769380	13945	5774.5	41.4091
431	7	6042504	Intron 4-5	G	C	-	2657	2	0.0752729
432	7	6042503	Intron 4-5	C	T	-	10588	1	0.00944465
433	7	6042477	Intron 4-5	C	G	-	10588	1	0.00944465
434	7	6042473	Intron 4-5	C	T	-	10588	1	0.00944465
435	7	6042472	Intron 4-5	A	G	-	10588	1.5	0.014167
436	7	6042465	Intron 4-5	G	C	-	10588	1	0.00944465
437	7	6042459	Intron 4-5	AGAG	-	-	10588	1	0.00944465
438	7	6042436	Intron 4-5	T	G	rs553837232	13245	4	0.0302001
439	7	6042433	Intron 4-5	G	C	-	10588	1	0.00944465
440	7	6042409	Intron 4-5	T	C	-	10588	1	0.00944465
441	7	6042401	Intron 4-5	C	T	-	10588	1	0.00944465
442	7	6042389	Intron 4-5	G	A	-	10588	1	0.00944465
443	7	6042378	Intron 4-5	G	A	-	10588	1	0.00944465
444	7	6042344	Intron 4-5	T	A	-	13245	5	0.0377501
445	7	6042340	Intron 4-5	C	G	-	10588	1	0.00944465
446	7	6042075	Intron 5-6	T	C	rs759013264	13245	3.5	0.0264251
447	7	6042050	Intron 5-6	A	G	rs772460483	10588	1	0.00944465
448	7	6042043	Intron 5-6	A	G	rs536288820	10588	1	0.00944465
449	7	6042041	Intron 5-6	G	A	-	10588	1	0.00944465
450	7	6042038	Intron 5-6	T	C	rs568887110	10588	2.5	0.0236116
451	7	6041989	Intron 5-6	G	A	-	10588	1	0.00944465
452	7	6041980	Intron 5-6	T	C	-	10588	1	0.00944465
453	7	6041920	Intron 5-6	C	G	-	10588	1	0.00944465
454	7	6041907	Intron 5-6	A	G	-	10588	2	0.0188893
455	7	6041897	Intron 5-6	T	C	rs6953340	13945	1146.5	8.22158
456	7	6041892	Intron 5-6	T	A	-	10588	1	0.00944465
457	7	6041859	Intron 5-6	CTCA	-	-	10588	1	0.00944465
458	7	6041836	Intron 5-6	T	A	rs10951973	13945	5779	41.4414
459	7	6041835	Intron 5-6	T	A	rs577477250	13945	96	0.688419
460	7	6041818	Intron 5-6	G	A	rs10951972	13945	5722	41.0326
461	7	6041817	Intron 5-6	T	A	-	10588	1	0.00944465
462	7	6041809	Intron 5-6	T	A	-	10588	1	0.00944465
463	7	6041803	Intron 5-6	G	T	-	2657	2	0.0752729
464	7	6041795	Intron 5-6	AACTAC	-	-	13245	125.5	0.947527
465	7	6041785	Intron 5-6	C	G	-	10588	1	0.00944465
466	7	6041775	Intron 5-6	T	G	-	13245	5	0.0377501
467	7	6041732	Intron 5-6	C	T	-	10588	4	0.0377786
468	7	6041726	Intron 5-6	T	C	-	2657	1	0.0376364
469	7	6041722	Intron 5-6	G	A	rs201389874	13245	41	0.309551
470	7	6041721	Intron 5-6	C	T	rs901415178	13245	2	0.0151
471	7	6041703	Intron 5-6	C	T	-	13245	9	0.0679502
472	7	6041697	Intron 5-6	G	T	-	10588	1	0.00944465
473	7	6041644	Intron 5-6	A	T	rs185975096	2747	39	1.41973
474	7	6041631	Intron 5-6	G	T	-	2657	1	0.0376364
475	7	6041611	Intron 5-6	G	A	-	10588	1.5	0.014167
476	7	6041603	Intron 5-6	G	T	-	10588	1	0.00944465
477	7	6041603	Intron 5-6	G	A	-	10588	1	0.00944465
478	7	6041602	Intron 5-6	C	T	-	10588	4	0.0377786
479	7	6041586	Intron 5-6	C	T	-	13245	2.5	0.018875
480	7	6041570	Intron 5-6	C	-	-	10588	1	0.00944465
481	7	6041566	Intron 5-6	G	A	-	10588	1	0.00944465
482	7	6041564	Intron 5-6	C	T	rs528302153	10588	1	0.00944465
483	7	6041555	Intron 5-6	T	C	-	10588	1	0.00944465
484	7	6041543	Intron 5-6	G	C	-	10588	2	0.0188893
485	7	6041538	Intron 5-6	C	T	rs867416893	10588	1	0.00944465
486	7	6041531	Intron 5-6	G	T	-	10588	7.5	0.0708349
487	7	6041521	Intron 5-6	G	A	-	90	1	1.11111
488	7	6041507	Intron 5-6	G	C	-	10588	1	0.00944465
489	7	6041506	Intron 5-6	T	C	rs12702464	13335	1150.5	8.62767
490	7	6041505	Intron 5-6	T	C	-	10588	1	0.00944465
491	7	6041497	Intron 5-6	G	A	-	10588	1	0.00944465
492	7	6041493	Intron 5-6	A	T	-	10588	1	0.00944465
493	7	6041482	Intron 5-6	G	C	rs548738419	10588	1	0.00944465
494	7	6041467	Intron 5-6	T	A	-	10588	1	0.00944465
495	7	6041450	Intron 5-6	C	A	-	2657	2	0.0752729
496	7	6041432	Intron 5-6	T	C	-	10588	1	0.00944465
497	7	6041426	Intron 5-6	-	CAGCCTGGA	-	10588	1	0.00944465
498	7	6041415	Intron 5-6	G	T	-	13245	2	0.0151
499	7	6041407	Intron 5-6	G	C	-	10588	1	0.00944465
500	7	6041398	Intron 5-6	T	C	-	10588	1	0.00944465
501	7	6041390	Intron 5-6	A	C	-	10588	1	0.00944465
502	7	6041387	Intron 5-6	G	T	-	610	1	0.163934
503	7	6041379	Intron 5-6	C	T	-	13245	19.5	0.147225
504	7	6041375	Intron 5-6	G	T	-	2657	2	0.0752729
505	7	6041367	Intron 5-6	C	T	rs544320665	90	1	1.11111
506	7	6041367	Intron 5-6	C	A	-	10588	1	0.00944465
507	7	6041356	Intron 5-6	T	G	-	10588	1	0.00944465
508	7	6041342	Intron 5-6	T	C	-	10588	1	0.00944465
509	7	6041338	Intron 5-6	G	A	-	10588	1	0.00944465
510	7	6041333	Intron 5-6	G	A	-	10588	1.5	0.014167
511	7	6041329	Intron 5-6	A	C	-	10588	1	0.00944465
512	7	6041326	Intron 5-6	T	C	-	10588	1	0.00944465
513	7	6041289	Intron 5-6	T	C	rs565474945	10588	1	0.00944465
514	7	6041285	Intron 5-6	C	T	-	2657	1	0.0376364
515	7	6041236	Intron 5-6	G	A	-	10588	1	0.00944465
516	7	6041213	Intron 5-6	G	C	-	10588	1	0.00944465
517	7	6041172	Intron 5-6	T	C	rs137920055	13945	400	2.86841
518	7	6041165	Intron 5-6	C	T	-	13245	3	0.0226501
519	7	6041153	Intron 5-6	C	T	-	10588	1	0.00944465
520	7	6041131	Intron 5-6	A	G	-	10588	1	0.00944465
521	7	6041127	Intron 5-6	A	T	-	10588	1	0.00944465
522	7	6041097	Intron 5-6	A	G	rs34197105	13335	1150.5	8.62767
523	7	6041094	Intron 5-6	C	T	-	610	1	0.163934
524	7	6041079	Intron 5-6	G	A	rs977483957	13245	2	0.0151
525	7	6041078	Intron 5-6	C	T	-	10588	1	0.00944465
526	7	6041071	Intron 5-6	G	A	-	10588	1	0.00944465
527	7	6041059	Intron 5-6	T	C	-	13855	10	0.0721761
528	7	6041039	Intron 5-6	G	T	-	2657	1	0.0376364
529	7	6041029	Intron 5-6	G	T	-	10588	1	0.00944465
530	7	6041028	Intron 5-6	G	A	-	13245	22.5	0.169875
531	7	6041023	Intron 5-6	G	C	-	10588	1	0.00944465
532	7	6041011	Intron 5-6	-	C	-	2657	10	0.376364
533	7	6041004	Intron 5-6	T	-	rs1035822033	10588	125	1.18058
534	7	6041004	Intron 5-6	TTT	-	-	10588	7283.5	68.7901
535	7	6041004	Intron 5-6	TT	-	-	10588	1056.5	9.97828
536	7	6041004	Intron 5-6	TTTT	-	-	10588	12.5	0.118058
537	7	6041004	Intron 5-6	-	T	rs35742778	11185	15.5	0.138578
538	7	6041004	Intron 5-6	-	TT	-	11185	38	0.339741
539	7	6041004	Intron 5-6	-	TTT	-	10588	2.5	0.0236116
540	7	6040996	Intron 5-6	A	-	-	10588	1	0.00944465
541	7	6040994	Intron 5-6	G	C	-	13245	3.5	0.0264251
542	7	6040981	Intron 5-6	C	A	-	10588	1	0.00944465
543	7	6040927	Intron 5-6	C	T	-	10588	1	0.00944465
544	7	6040924	Intron 5-6	T	C	rs548774832	10588	6	0.0566679
545	7	6040915	Intron 5-6	A	G	-	10588	1	0.00944465
546	7	6040905	Intron 5-6	T	C	-	10588	1	0.00944465
547	7	6040885	Intron 5-6	G	C	-	10588	1	0.00944465
548	7	6040853	Intron 5-6	T	C	-	2657	1	0.0376364
549	7	6040847	Intron 5-6	G	C	rs569281463	13245	14.5	0.109475
550	7	6040834	Intron 5-6	C	A	-	10588	1	0.00944465
551	7	6040834	Intron 5-6	C	T	-	10588	1	0.00944465
552	7	6040820	Intron 5-6	G	T	rs532466707	13335	6.5	0.0487439
553	7	6040817	Intron 5-6	C	G	-	10588	1	0.00944465
554	7	6040791	Intron 5-6	C	T	-	10588	1	0.00944465
555	7	6040784	Intron 5-6	A	G	-	10588	1	0.00944465
556	7	6040778	Intron 5-6	C	A	rs191263300	10588	1	0.00944465
557	7	6040759	Intron 5-6	A	G	rs561560907	10588	5.5	0.0519456
558	7	6040756	Intron 5-6	A	T	-	2657	1	0.0376364
559	7	6040735	Intron 5-6	G	A	-	10588	1	0.00944465
560	7	6040723	Intron 5-6	C	T	-	10588	1	0.00944465
561	7	6040717	Intron 5-6	A	T	-	10588	1	0.00944465
562	7	6040705	Intron 5-6	T	C	-	10588	1	0.00944465
563	7	6040677	Intron 5-6	T	C	rs543293967	10588	1	0.00944465
564	7	6040670	Intron 5-6	A	G	-	10588	1	0.00944465
565	7	6040666	Intron 5-6	-	A	-	10588	2.5	0.0236116
566	7	6040638	Intron 5-6	T	A	-	610	1	0.163934
567	7	6040631	Intron 5-6	A	C	rs2345058	13945	5809	41.6565
568	7	6040624	Intron 5-6	A	G	-	10588	2	0.0188893
569	7	6040614	Intron 5-6	G	A	-	10588	1	0.00944465
570	7	6040611	Intron 5-6	G	C	rs892915721	10588	1.5	0.014167
571	7	6040601	Intron 5-6	G	A	rs577634543	10588	1	0.00944465
572	7	6040598	Intron 5-6	G	T	-	10588	1	0.00944465
573	7	6040577	Intron 5-6	G	A	-	13245	9.5	0.0717252
574	7	6040571	Intron 5-6	G	A	-	10588	1	0.00944465
575	7	6040570	Intron 5-6	C	T	rs186370973	13335	12.5	0.0937383
576	7	6040562	Intron 5-6	C	T	-	13245	2	0.0151
577	7	6040557	Intron 5-6	G	C	rs1045980150	13245	2.5	0.018875
578	7	6040526	Intron 5-6	G	A	-	13245	3	0.0226501
579	7	6040514	Intron 5-6	C	T	-	10588	1	0.00944465
580	7	6040503	Intron 5-6	T	A	-	10588	1	0.00944465
581	7	6040490	Intron 5-6	C	T	-	13245	3	0.0226501
582	7	6040487	Intron 5-6	T	G	rs2345059	13335	4958.5	37.1841
583	7	6040483	Intron 5-6	G	A	-	13245	3	0.0226501
584	7	6040482	Intron 5-6	C	T	rs200445527	10588	1	0.00944465
585	7	6040454	Intron 5-6	T	G	-	10588	1	0.00944465
586	7	6040443	Intron 5-6	G	C	-	2657	1	0.0376364
587	7	6040443	Intron 5-6	A	-	-	10588	1	0.00944465
588	7	6040433	Intron 5-6	C	T	-	10588	1	0.00944465
589	7	6040412	Intron 5-6	A	G	-	13245	4.5	0.0339751
590	7	6040408	Intron 5-6	G	T	-	10588	1	0.00944465
591	7	6040398	Intron 5-6	G	C	rs569849183	13245	4.5	0.0339751
592	7	6040348	Intron 5-6	G	A	rs186007923	10588	4	0.0377786
593	7	6040337	Intron 5-6	A	G	rs528493605	10588	1	0.00944465
594	7	6040334	Intron 5-6	A	G	-	2657	1	0.0376364
595	7	6040265	Intron 5-6	T	G	-	13245	3.5	0.0264251
596	7	6040250	Intron 5-6	T	C	-	10588	1	0.00944465
597	7	6040248	Intron 5-6	T	-	-	10588	1	0.00944465
598	7	6040240	Intron 5-6	A	C	-	10588	1	0.00944465
599	7	6040233	Intron 5-6	CTG	-	-	10588	1	0.00944465
600	7	6040209	Intron 5-6	A	C	rs545223138	13245	5	0.0377501
601	7	6040203	Intron 5-6	C	T	-	10588	1	0.00944465
602	7	6040174	Intron 5-6	G	C	-	10588	1	0.00944465
603	7	6040127	Intron 5-6	A	T	-	10588	1	0.00944465
604	7	6040097	Intron 5-6	A	C	-	10588	1.5	0.014167
605	7	6040077	Intron 5-6	A	G	-	10588	1	0.00944465
606	7	6040069	Intron 5-6	T	A	-	10588	1	0.00944465
607	7	6040067	Intron 5-6	C	A	-	2657	1	0.0376364
608	7	6040061	Intron 5-6	T	C	-	13245	2	0.0151
609	7	6040047	Intron 5-6	A	C	-	10588	1	0.00944465
610	7	6040009	Intron 5-6	A	T	-	2657	1	0.0376364
611	7	6040008	Intron 5-6	A	-	-	10588	6361	60.0774
612	7	6040008	Intron 5-6	AA	-	-	10588	2368.5	22.3697
613	7	6040008	Intron 5-6	AAA	-	-	10588	27.5	0.259728
614	7	6040008	Intron 5-6	AAAA	-	-	10588	224	2.1156
615	7	6040008	Intron 5-6	AAAAA	-	-	10588	20	0.188893
616	7	6040008	Intron 5-6	-	A	-	10588	3.5	0.0330563
617	7	6040002	Intron 5-6	C	A	-	10583	1	0.00944912
618	7	6040001	Intron 5-6	T	C	-	10585	1	0.00944733
619	7	6039984	Intron 5-6	G	A	-	10588	1	0.00944465
620	7	6039971	Intron 5-6	T	C	-	10588	1	0.00944465
621	7	6039951	Intron 5-6	G	T	-	10588	1	0.00944465
622	7	6039945	Intron 5-6	C	T	rs1017467583	10588	2	0.0188893
623	7	6039941	Intron 5-6	G	T	rs13245536	13335	1141.5	8.56018
624	7	6039936	Intron 5-6	T	A	-	13245	6	0.0453001
625	7	6039931	Intron 5-6	G	T	-	10588	1	0.00944465
626	7	6039926	Intron 5-6	G	A	-	10588	1	0.00944465
627	7	6039903	Intron 5-6	G	A	-	13245	8	0.0604002
628	7	6039898	Intron 5-6	G	C	rs547097394	13335	10.5	0.0787402
629	7	6039876	Intron 5-6	G	T	-	10588	1	0.00944465
630	7	6039875	Intron 5-6	C	T	rs1023304641	10588	15.5	0.146392
631	7	6039861	Intron 5-6	C	T	rs990484464	10588	1	0.00944465
632	7	6039841	Intron 5-6	-	A	rs971115303	10588	2	0.0188893
633	7	6039825	Intron 5-6	G	A	-	10588	1	0.00944465
634	7	6039822	Intron 5-6	A	G	-	10588	1	0.00944465
635	7	6039821	Intron 5-6	C	G	-	10588	1	0.00944465
636	7	6039798	Intron 5-6	G	A	rs755330638	10588	2.5	0.0236116
637	7	6039797	Intron 5-6	C	T	rs1004534331	10588	1	0.00944465
638	7	6039796	Intron 5-6	A	T	-	10588	2	0.0188893
639	7	6039788	Intron 5-6	T	C	-	10588	1	0.00944465
640	7	6039787	Intron 5-6	C	T	rs975430954	13245	2	0.0151
641	7	6039786	Intron 5-6	A	C	-	13245	2.5	0.018875
642	7	6039765	Intron 5-6	G	A	-	10588	1	0.00944465
643	7	6039749	Intron 5-6	A	-	-	10588	1.5	0.014167
644	7	6039748	Intron 5-6	G	A	rs540742320	10588	1	0.00944465
645	7	6039736	Intron 5-6	G	-	-	10588	1	0.00944465
646	7	6039730	Intron 5-6	G	C	-	2657	1	0.0376364
647	7	6039728	Intron 5-6	A	T	-	10588	1	0.00944465
648	7	6039721	Intron 5-6	T	C	-	10588	1	0.00944465
649	7	6039706	Intron 5-6	G	C	-	10588	1	0.00944465
650	7	6039687	Intron 5-6	G	C	rs543012435	2657	2	0.0752729
651	7	6039672	Intron 5-6	G	C	-	10588	1	0.00944465
652	7	6039670	Intron 5-6	G	A	-	10588	1.5	0.014167
653	7	6039668	Intron 5-6	G	C	-	10588	1	0.00944465
654	7	6039667	Intron 5-6	A	T	-	10588	1	0.00944465
655	7	6039664	Intron 5-6	G	A	-	10588	1	0.00944465
656	7	6039641	Intron 5-6	C	T	rs990045263	10588	1	0.00944465
657	7	6039638	Intron 5-6	T	C	-	10588	1	0.00944465
658	7	6039616	Intron 5-6	T	C	-	10588	1	0.00944465
659	7	6039611	Intron 5-6	A	G	-	13245	4	0.0302001
660	7	6039608	Intron 5-6	T	C	rs75627652	2657	1	0.0376364
661	7	6039570	Intron 5-6	T	C	-	10588	1	0.00944465
662	7	6039550	Intron 5-6	A	G	-	10588	1	0.00944465
663	7	6039529	Intron 5-6	T	C	rs58026649	13932	5236	37.5825
664	7	6039488	Intron 5-6	G	T	-	90	1	1.11111
665	7	6039482	Intron 5-6	C	G	-	10588	1	0.00944465
666	7	6039456	Intron 5-6	A	G	-	10588	1	0.00944465
667	7	6039453	Intron 5-6	C	T	rs373438537	10588	1	0.00944465
668	7	6039452	Intron 5-6	A	G	-	10588	1	0.00944465
669	7	6039395	Intron 5-6	C	A	-	10588	1	0.00944465
670	7	6039394	Intron 5-6	T	C	-	10588	1	0.00944465
671	7	6039384	Intron 5-6	A	C	rs79245786	13335	883	6.62167
672	7	6039359	Intron 5-6	C	A	-	610	1	0.163934
673	7	6039348	Intron 5-6	G	A	-	13245	5.5	0.0415251
674	7	6039342	Intron 5-6	G	A	-	10588	1	0.00944465
675	7	6039341	Intron 5-6	C	T	rs528966677	10588	2	0.0188893
676	7	6039328	Intron 5-6	G	A	rs561620695	13245	2	0.0151
677	7	6039288	Intron 5-6	G	C	-	10588	1	0.00944465
678	7	6039287	Intron 5-6	C	T	rs1002136905	10588	1	0.00944465
679	7	6039284	Intron 5-6	G	A	rs929996645	10588	1	0.00944465
680	7	6039268	Intron 5-6	A	T	rs564442382	90	1	1.11111
681	7	6039267	Intron 5-6	T	A	rs545792163	2657	5	0.188182
682	7	6039267	Intron 5-6	-	A	rs11370124	2657	301	11.3286
683	7	6039241	Intron 5-6	G	A	rs759413548	10588	1	0.00944465
684	7	6039240	Intron 5-6	A	G	rs957956585	10588	3	0.028334
685	7	6039170	Intron 5-6	A	-	-	10588	1	0.00944465
686	7	6039168	Intron 5-6	C	G	-	10588	1	0.00944465
687	7	6039133	Intron 5-6	T	G	-	10588	1	0.00944465
688	7	6039129	Intron 5-6	T	C	rs2345060	13945	937.5	6.72284
689	7	6039092	Intron 5-6	G	A	rs745791334	13245	4	0.0302001
690	7	6039080	Intron 5-6	G	A	rs7784177	2657	3	0.112909
691	7	6039079	Intron 5-6	C	T	rs558104560	10588	1	0.00944465
692	7	6039065	Intron 5-6	T	A	-	10588	1	0.00944465
693	7	6039036	Intron 5-6	A	G	-	2657	1	0.0376364
694	7	6039034	Intron 5-6	G	A	-	10588	1.5	0.014167
695	7	6039021	Intron 5-6	A	C	-	10588	1	0.00944465
696	7	6039005	Intron 5-6	C	G	-	10588	1	0.00944465
697	7	6039000	Intron 5-6	A	C	-	10588	1	0.00944465
698	7	6038989	Intron 5-6	A	G	-	10588	1	0.00944465
699	7	6038986	Intron 5-6	C	T	rs148728760	11198	2	0.0178603
700	7	6038943	Intron 5-6	T	A	rs192410449	13335	3	0.0224972
701	7	6038932	Intron 5-6	T	C	rs549598245	10588	1.5	0.014167
702	7	6038922	Intron 5-6	A	C	rs763941291	13245	5	0.0377501
703	7	6038921	Intron 5-6	C	G	-	10588	1	0.00944465
704	7	6038915	Intron 5-6	-	AAACAC	-	10588	1	0.00944465
705	7	6038722	Intron 6-7	T	C	rs62456182	13945	6093	43.6931
706	7	6038718	Intron 6-7	G	A	rs201259464	90	1	1.11111
707	7	6038715	Intron 6-7	G	A	-	10588	1.5	0.014167
708	7	6038713	Intron 6-7	G	C	-	10588	1	0.00944465
709	7	6038706	Intron 6-7	A	G	rs936494594	13245	2	0.0151
710	7	6038703	Intron 6-7	G	A	rs111908557	10588	1	0.00944465
711	7	6038698	Intron 6-7	C	T	rs750096561	10588	1	0.00944465
712	7	6038687	Intron 6-7	C	T	-	10588	1	0.00944465
713	7	6038679	Intron 6-7	T	C	-	13245	6.5	0.0490751
714	7	6038622	Intron 6-7	A	-	-	610	2	0.327869
715	7	6038621	Intron 6-7	A	-	rs11289444	1207	26	2.1541
716	7	6038621	Intron 6-7	AA	-	-	610	2	0.327869
717	7	6038620	Intron 6-7	AAAAAA	-	-	2657	1	0.0376364
718	7	6038612	Intron 6-7	C	G	-	2657	1	0.0376364
719	7	6038607	Intron 6-7	C	T	-	10588	1	0.00944465
720	7	6038581	Intron 6-7	A	G	-	10588	1	0.00944465
721	7	6038553	Intron 6-7	G	A	rs1025264033	13245	3	0.0226501
722	7	6038552	Intron 6-7	C	T	rs1012643837	10588	1	0.00944465
723	7	6038544	Intron 6-7	C	G	-	10588	1	0.00944465
724	7	6038530	Intron 6-7	A	C	-	10588	1	0.00944465
725	7	6038522	Intron 6-7	G	A	-	10588	1	0.00944465
726	7	6038513	Intron 6-7	C	T	rs535684771	13245	9	0.0679502
727	7	6038495	Intron 6-7	G	A	rs995945646	10588	1.5	0.014167
728	7	6038483	Intron 6-7	G	A	rs6949598	13945	1146	8.218
729	7	6038466	Intron 6-7	C	A	-	10588	3.5	0.0330563
730	7	6038439	Intron 6-7	G	A	-	10588	1	0.00944465
731	7	6038438	Intron 6-7	C	T	rs375647742	13245	7	0.0528501
732	7	6038433	Intron 6-7	C	T	-	10588	1	0.00944465
733	7	6038398	Intron 6-7	G	A	-	10588	1	0.00944465
734	7	6038394	Intron 6-7	T	C	rs6974270	13945	1147.5	8.22876
735	7	6038388	Intron 6-7	C	T	-	10588	1	0.00944465
736	7	6038377	Intron 6-7	C	T	-	2657	1	0.0376364
737	7	6038358	Intron 6-7	C	T	rs560472831	10588	2	0.0188893
738	7	6038345	Intron 6-7	G	A	rs948189013	10588	1	0.00944465
739	7	6038340	Intron 6-7	C	T	-	10587	3	0.0283366
740	7	6038320	Intron 6-7	A	C	-	2657	4	0.150546
741	7	6038317	Intron 6-7	T	A	-	10588	1	0.00944465
742	7	6038316	Intron 6-7	C	G	-	10588	1	0.00944465
743	7	6038315	Intron 6-7	A	G	-	10588	1	0.00944465
744	7	6038306	Intron 6-7	C	A	-	13335	13	0.0974878
745	7	6038306	Intron 6-7	C	T	-	10588	1	0.00944465
746	7	6038305	Intron 6-7	A	G	-	13245	31	0.234051
747	7	6038302	Intron 6-7	G	C	-	13245	5	0.0377501
748	7	6038298	Intron 6-7	C	T	-	13245	2	0.0151
749	7	6038295	Intron 6-7	A	C	rs146370552	13335	400.5	3.00337
750	7	6038291	Intron 6-7	C	T	-	2657	1	0.0376364
751	7	6038282	Intron 6-7	G	A	rs562545418	13245	33.5	0.252926
752	7	6038281	Intron 6-7	C	T	-	13245	3.5	0.0264251
753	7	6038279	Intron 6-7	G	A	-	2657	4	0.150546
754	7	6038272	Intron 6-7	C	G	-	13245	24.5	0.184975
755	7	6038249	Intron 6-7	C	T	rs544353897	10588	1	0.00944465
756	7	6038247	Intron 6-7	C	T	rs1016160568	10588	1	0.00944465
757	7	6038220	Intron 6-7	G	T	-	13245	9.5	0.0717252
758	7	6038179	Intron 6-7	G	C	rs12702463	13335	1144	8.57893
759	7	6038165	Intron 6-7	A	G	-	2657	2	0.0752729
760	7	6038160	Intron 6-7	C	T	rs190780453	13245	3.5	0.0264251
761	7	6038139	Intron 6-7	C	G	-	10588	1	0.00944465
762	7	6038136	Intron 6-7	C	T	-	11198	2	0.0178603
763	7	6038122	Intron 6-7	G	A	-	2657	1	0.0376364
764	7	6038121	Intron 6-7	C	T	-	2657	1	0.0376364
765	7	6038098	Intron 6-7	C	T	-	13245	18	0.1359
766	7	6038095	Intron 6-7	A	G	-	10588	1	0.00944465
767	7	6038095	Intron 6-7	A	C	-	10588	1	0.00944465
768	7	6038092	Intron 6-7	G	T	-	10588	1	0.00944465
769	7	6038090	Intron 6-7	G	A	rs1056621197	13245	6.5	0.0490751
770	7	6038088	Intron 6-7	C	T	-	13245	2	0.0151
771	7	6038062	Intron 6-7	G	A	-	10588	1	0.00944465
772	7	6038053	Intron 6-7	G	A	-	10588	1	0.00944465
773	7	6038053	Intron 6-7	G	C	-	10588	1	0.00944465
774	7	6038050	Intron 6-7	G	A	rs137939692	13842	111	0.801907
775	7	6038045	Intron 6-7	T	C	rs73331331	13945	5763	41.3266
776	7	6038044	Intron 6-7	C	T	-	10588	1	0.00944465
777	7	6038038	Intron 6-7	C	A	-	10588	2.5	0.0236116
778	7	6038017	Intron 6-7	T	C	-	10588	1	0.00944465
779	7	6038007	Intron 6-7	G	A	rs570502284	13335	134.5	1.00862
780	7	6038006	Intron 6-7	G	A	rs985499974	13245	3.5	0.0264251
781	7	6038002	Intron 6-7	C	T	rs759778506	10588	1.5	0.014167
782	7	6037991	Intron 6-7	G	A	rs76993112	14542	5231.5	35.9751
783	7	6037968	Intron 6-7	C	T	-	13245	4.5	0.0339751
784	7	6037964	Intron 6-7	G	C	-	10588	1	0.00944465
785	7	6037962	Intron 6-7	C	T	rs190224996	13335	17.5	0.131234
786	7	6037954	Intron 6-7	G	A	-	10588	1	0.00944465
787	7	6037949	Intron 6-7	G	T	-	10588	1	0.00944465
788	7	6037944	Intron 6-7	C	G	-	13245	4	0.0302001
789	7	6037944	Intron 6-7	C	T	-	10588	2	0.0188893
790	7	6037932	Intron 6-7	-	A	-	10588	1	0.00944465
791	7	6037924	Intron 6-7	G	C	-	10588	1	0.00944465
792	7	6037913	Intron 6-7	A	T	-	10588	1	0.00944465
793	7	6037909	Intron 6-7	C	T	-	10588	1	0.00944465
794	7	6037894	Intron 6-7	G	A	-	10588	1	0.00944465
795	7	6037869	Intron 6-7	C	G	-	10588	1	0.00944465
796	7	6037860	Intron 6-7	C	T	rs919041362	10588	1	0.00944465
797	7	6037856	Intron 6-7	G	A	rs141202232	10588	1	0.00944465
798	7	6037837	Intron 6-7	T	C	-	10588	1	0.00944465
799	7	6037831	Intron 6-7	G	A	-	10588	1	0.00944465
800	7	6037817	Intron 6-7	CT	-	-	10588	1	0.00944465
801	7	6037816	Intron 6-7	G	A	rs1057138478	10588	1	0.00944465
802	7	6037815	Intron 6-7	C	A	rs769559495	10588	1	0.00944465
803	7	6037805	Intron 6-7	C	T	rs966758915	13245	2	0.0151
804	7	6037779	Intron 6-7	C	G	-	10588	1	0.00944465
805	7	6037768	Intron 6-7	A	G	-	10588	2.5	0.0236116
806	7	6037767	Intron 6-7	C	T	-	10588	1	0.00944465
807	7	6037759	Intron 6-7	C	T	-	10588	1	0.00944465
808	7	6037756	Intron 6-7	A	G	-	10588	1	0.00944465
809	7	6037752	Intron 6-7	G	A	rs941426042	10588	1	0.00944465
810	7	6037751	Intron 6-7	C	T	-	10588	1	0.00944465
811	7	6037740	Intron 6-7	T	C	-	10588	1	0.00944465
812	7	6037725	Intron 6-7	T	G	-	2657	1	0.0376364
813	7	6037723	Intron 6-7	T	G	rs74189692	3267	1534	46.9544
814	7	6037715	Intron 6-7	T	G	rs75745061	3267	1536	47.0156
815	7	6037714	Intron 6-7	T	G	rs78803671	2657	2	0.0752729
816	7	6037711	Intron 6-7	T	G	rs377703387	2657	1	0.0376364
817	7	6037707	Intron 6-7	T	C	-	10588	1	0.00944465
818	7	6037653	Intron 6-7	G	T	rs967757131	2657	1	0.0376364
819	7	6037638	Intron 6-7	C	T	-	10588	1	0.00944465
820	7	6037610	Intron 6-7	AG	-	-	10588	1	0.00944465
821	7	6037592	Intron 6-7	A	G	-	10588	2	0.0188893
822	7	6037585	Intron 6-7	T	A	-	10588	3	0.028334
823	7	6037583	Intron 6-7	A	G	rs979401236	13245	7.5	0.0566251
824	7	6037582	Intron 6-7	C	T	-	2657	3	0.112909
825	7	6037542	Intron 6-7	A	C	-	10588	1	0.00944465
826	7	6037522	Intron 6-7	C	T	rs376500086	2657	3	0.112909
827	7	6037509	Intron 6-7	G	A	-	10588	1	0.00944465
828	7	6037480	Intron 6-7	C	T	-	10588	1	0.00944465
829	7	6037458	Intron 6-7	C	G	-	10588	1	0.00944465
830	7	6037446	Intron 6-7	G	C	-	2657	1	0.0376364
831	7	6037446	Intron 6-7	G	A	-	610	1	0.163934
832	7	6037445	Intron 6-7	C	T	-	10588	1	0.00944465
833	7	6037437	Intron 6-7	T	C	-	10588	1	0.00944465
834	7	6037419	Intron 6-7	G	A	-	13245	2	0.0151
835	7	6037411	Intron 6-7	G	A	-	10588	1	0.00944465
836	7	6037381	Intron 6-7	G	A	rs533897208	10588	1	0.00944465
837	7	6037379	Intron 6-7	C	T	-	13245	2	0.0151
838	7	6037367	Intron 6-7	G	A	-	10588	1	0.00944465
839	7	6037360	Intron 6-7	T	C	rs889965455	10588	1	0.00944465
840	7	6037357	Intron 6-7	T	A	rs566532265	10588	1	0.00944465
841	7	6037354	Intron 6-7	T	-	-	10588	1.5	0.014167
842	7	6037348	Intron 6-7	T	A	-	10588	1	0.00944465
843	7	6037338	Intron 6-7	C	G	rs372219550	2657	1	0.0376364
844	7	6037313	Intron 6-7	G	T	-	2657	1	0.0376364
845	7	6037301	Intron 6-7	G	A	-	2657	1	0.0376364
846	7	6037300	Intron 6-7	C	T	rs189109218	10588	1	0.00944465
847	7	6037290	Intron 6-7	G	C	-	10588	1	0.00944465
848	7	6037288	Intron 6-7	G	A	rs993430951	10588	1	0.00944465
849	7	6037257	Intron 6-7	T	C	rs780765169	13245	7	0.0528501
850	7	6037254	Intron 6-7	C	T	rs1023983306	10588	1	0.00944465
851	7	6037232	Intron 6-7	A	G	rs59790240	13335	385.5	2.89089
852	7	6037218	Intron 6-7	C	T	-	10588	1	0.00944465
853	7	6037178	Intron 6-7	T	C	rs550834161	13335	37	0.277465
854	7	6037176	Intron 6-7	T	C	-	13245	3.5	0.0264251
855	7	6037147	Intron 6-7	C	T	-	2657	1	0.0376364
856	7	6037122	Intron 6-7	T	C	-	10588	1	0.00944465
857	7	6037081	Intron 6-7	G	C	rs768573076	13855	6.5	0.0469145
858	7	6037076	Intron 6-7	CA	-	-	10588	1.5	0.014167
859	7	6036944	Intron 7-8	G	A	-	13245	2	0.0151
860	7	6036896	Intron 7-8	A	-	-	610	1	0.163934
861	7	6036895	Intron 7-8	-	A	rs954263503	13855	14	0.101047
862	7	6036866	Intron 7-8	G	A	rs142290774	10588	1	0.00944465
863	7	6036865	Intron 7-8	C	T	rs1009727505	13245	4.5	0.0339751
864	7	6036848	Intron 7-8	A	-	rs879309592	610	7	1.14754
865	7	6036847	Intron 7-8	-	A	rs1012901908	610	1	0.163934
866	7	6036840	Intron 7-8	G	A	rs1055070032	13245	11	0.0830502
867	7	6036839	Intron 7-8	C	T	rs939154222	13245	17.5	0.132125
868	7	6036838	Intron 7-8	C	T	-	10588	1	0.00944465
869	7	6036804	Intron 7-8	C	A	-	13245	2	0.0151
870	7	6036802	Intron 7-8	A	G	rs7793254	13945	1529.5	10.9681
871	7	6036789	Intron 7-8	G	A	-	10588	1	0.00944465
872	7	6036778	Intron 7-8	G	C	-	10588	1	0.00944465
873	7	6036769	Intron 7-8	C	T	-	10588	1	0.00944465
874	7	6036763	Intron 7-8	T	G	-	2657	1	0.0376364
875	7	6036737	Intron 7-8	C	G	-	10678	7	0.0655553
876	7	6036726	Intron 7-8	T	A	-	10588	1	0.00944465
877	7	6036725	Intron 7-8	A	G	-	10588	5.5	0.0519456
878	7	6036718	Intron 7-8	G	A	-	10588	1	0.00944465
879	7	6036716	Intron 7-8	G	A	-	13245	7	0.0528501
880	7	6036709	Intron 7-8	G	T	rs965890403	10588	1	0.00944465
881	7	6036701	Intron 7-8	C	T	rs962210325	13245	2	0.0151
882	7	6036700	Intron 7-8	C	T	rs369598975	10588	1	0.00944465
883	7	6036677	Intron 7-8	C	A	-	2657	1	0.0376364
884	7	6036675	Intron 7-8	G	A	-	10588	1	0.00944465
885	7	6036661	Intron 7-8	C	T	rs546433065	13855	16.5	0.119091
886	7	6036631	Intron 7-8	A	G	-	10588	1	0.00944465
887	7	6036617	Intron 7-8	G	T	-	10588	2.5	0.0236116
888	7	6036613	Intron 7-8	A	C	-	2657	1	0.0376364
889	7	6036611	Intron 7-8	C	G	-	2657	1	0.0376364
890	7	6036603	Intron 7-8	T	G	-	10588	1	0.00944465
891	7	6036592	Intron 7-8	C	-	-	10588	1	0.00944465
892	7	6036560	Intron 7-8	C	A	-	10588	1	0.00944465
893	7	6036559	Intron 7-8	T	C	-	2657	1	0.0376364
894	7	6036556	Intron 7-8	T	C	-	10588	1	0.00944465
895	7	6036554	Intron 7-8	T	C	-	10588	1	0.00944465
896	7	6036529	Intron 7-8	C	A	rs930670481	10588	1	0.00944465
897	7	6036518	Intron 7-8	A	G	-	10588	1	0.00944465
898	7	6036517	Intron 7-8	C	A	-	10588	1	0.00944465
899	7	6036515	Intron 7-8	C	A	rs12112229	13335	1524	11.4286
900	7	6036504	Intron 7-8	T	C	-	10588	1	0.00944465
901	7	6036498	Intron 7-8	A	T	-	10588	1	0.00944465
902	7	6036455	Intron 7-8	T	G	-	2657	1	0.0376364
903	7	6036455	Intron 7-8	T	C	rs940508662	10588	1	0.00944465
904	7	6036448	Intron 7-8	T	C	rs992721346	10588	1	0.00944465
905	7	6036401	Intron 7-8	AC	-	-	10588	1	0.00944465
906	7	6036390	Intron 7-8	-	A	-	10588	1	0.00944465
907	7	6036384	Intron 7-8	A	G	-	10588	1	0.00944465
908	7	6036309	Intron 7-8	C	G	-	10588	1	0.00944465
909	7	6036307	Intron 7-8	T	C	rs1036426702	10588	1	0.00944465
910	7	6036306	Intron 7-8	A	T	-	2657	3	0.112909
911	7	6036269	Intron 7-8	C	T	rs374690066	13335	58	0.434946
912	7	6036266	Intron 7-8	T	C	-	10588	1	0.00944465
913	7	6036257	Intron 7-8	T	C	-	10588	1	0.00944465
914	7	6036249	Intron 7-8	AGAT	-	-	10588	1	0.00944465
915	7	6036245	Intron 7-8	C	T	rs10235277	10588	4040.5	38.1611
916	7	6036243	Intron 7-8	T	C	-	2657	29	1.09146
917	7	6036243	Intron 7-8	-	ATAC	-	2657	2	0.0752729
918	7	6036243	Intron 7-8	-	ATATATAC	-	2657	2	0.0752729
919	7	6036227	Intron 7-8	T	A	rs374247584	13139	68.5	0.521349
920	7	6036225	Intron 7-8	T	A	rs76428720	10654	942	8.84175
921	7	6036224	Intron 7-8	T	-	-	10334	2	0.0193536
922	7	6036221	Intron 7-8	-	AATATATAT	-	2657	1	0.0376364
923	7	6036221	Intron 7-8	-	ATAT	-	2657	23	0.865638
924	7	6036221	Intron 7-8	-	ATATAT	-	2657	136	5.11855
925	7	6036221	Intron 7-8	-	ATATATAT	-	2657	20	0.752729
926	7	6036219	Intron 7-8	A	T	rs543887447	90	1	1.11111
927	7	6036206	Intron 7-8	G	A	rs71524066	13201	1152	8.72661
928	7	6036199	Intron 7-8	T	C	-	10579	1	0.00945269
929	7	6036172	Intron 7-8	C	A	-	10588	1	0.00944465
930	7	6036159	Intron 7-8	C	T	rs192167966	10588	1	0.00944465
931	7	6036149	Intron 7-8	C	-	-	10588	1	0.00944465
932	7	6036139	Intron 7-8	G	A	-	2657	1	0.0376364
933	7	6036133	Intron 7-8	G	A	-	13245	3	0.0226501
934	7	6036113	Intron 7-8	G	A	-	10588	1	0.00944465
935	7	6036100	Intron 7-8	C	T	rs947029952	10588	1.5	0.014167
936	7	6036095	Intron 7-8	A	G	-	10588	1	0.00944465
937	7	6036072	Intron 7-8	G	C	rs868466648	10588	1	0.00944465
938	7	6036061	Intron 7-8	C	T	-	10588	1	0.00944465
939	7	6036054	Intron 7-8	T	C	-	10588	1	0.00944465
940	7	6036051	Intron 7-8	T	G	-	10588	1	0.00944465
941	7	6036049	Intron 7-8	G	A	-	10588	1	0.00944465
942	7	6036030	Intron 7-8	-	A	-	2657	1	0.0376364
943	7	6036027	Intron 7-8	A	G	-	10588	1	0.00944465
944	7	6036013	Intron 7-8	C	T	rs1029221085	10588	1	0.00944465
945	7	6036006	Intron 7-8	G	A	rs554828934	10588	4.5	0.0425009
946	7	6036005	Intron 7-8	C	T	rs7805798	13945	1145.5	8.21441
947	7	6035994	Intron 7-8	G	A	-	13245	4.5	0.0339751
948	7	6035993	Intron 7-8	T	C	-	10588	1	0.00944465
949	7	6035987	Intron 7-8	C	A	-	610	1	0.163934
950	7	6035949	Intron 7-8	C	-	rs138928387	1207	7	0.57995
951	7	6035948	Intron 7-8	C	-	-	13245	5174.5	39.0676
952	7	6035944	Intron 7-8	A	G	rs7788441	14452	11471	79.3731
953	7	6035888	Intron 7-8	G	T	-	10588	1	0.00944465
954	7	6035866	Intron 7-8	G	T	-	610	1	0.163934
955	7	6035855	Intron 7-8	T	C	rs761157474	10588	1	0.00944465
956	7	6035845	Intron 7-8	G	C	-	2657	1	0.0376364
957	7	6035823	Intron 7-8	G	A	-	10588	3	0.028334
958	7	6035817	Intron 7-8	G	C	-	10588	1	0.00944465
959	7	6035796	Intron 7-8	G	C	rs552828491	10588	5.5	0.0519456
960	7	6035787	Intron 7-8	A	C	-	10588	1	0.00944465
961	7	6035772	Intron 7-8	A	G	-	10588	1	0.00944465
962	7	6035768	Intron 7-8	G	C	-	10588	1	0.00944465
963	7	6035755	Intron 7-8	G	A	rs536754091	10588	1	0.00944465
964	7	6035753	Intron 7-8	C	T	rs550999673	13245	2	0.0151
965	7	6035748	Intron 7-8	G	A	rs947629861	10588	1	0.00944465
966	7	6035741	Intron 7-8	A	G	-	10588	1	0.00944465
967	7	6035721	Intron 7-8	G	A	-	10588	1	0.00944465
968	7	6035720	Intron 7-8	C	T	-	10588	1	0.00944465
969	7	6035708	Intron 7-8	G	T	-	10588	1	0.00944465
970	7	6035703	Intron 7-8	C	T	-	2657	1	0.0376364
971	7	6035686	Intron 7-8	G	A	rs375798394	10588	2	0.0188893
972	7	6035685	Intron 7-8	C	T	-	10588	1	0.00944465
973	7	6035601	Intron 7-8	G	A	rs943674317	13245	12	0.0906002
974	7	6035597	Intron 7-8	C	T	-	10588	3.5	0.0330563
975	7	6035581	Intron 7-8	A	C	-	10588	1	0.00944465
976	7	6035574	Intron 7-8	C	T	-	10588	1	0.00944465
977	7	6035555	Intron 7-8	A	T	-	10588	1	0.00944465
978	7	6035544	Intron 7-8	G	C	rs75789013	10678	2.5	0.0234126
979	7	6035521	Intron 7-8	T	C	rs544634943	13245	26	0.1963
980	7	6035507	Intron 7-8	C	T	rs2286680	13945	1158	8.30405
981	7	6035505	Intron 7-8	G	A	rs1001523298	10588	1	0.00944465
982	7	6035504	Intron 7-8	C	T	rs187535701	13335	17	0.127484
983	7	6035503	Intron 7-8	G	A	-	10588	1	0.00944465
984	7	6035501	Intron 7-8	G	C	-	10588	1.5	0.014167
985	7	6035487	Intron 7-8	C	A	-	610	1	0.163934
986	7	6035438	Intron 7-8	G	C	-	10588	1.5	0.014167
987	7	6035428	Intron 7-8	A	C	rs2286681	13945	6067	43.5066
988	7	6035422	Intron 7-8	T	A	-	10588	1	0.00944465
989	7	6035402	Intron 7-8	G	T	-	10588	2.5	0.0236116
990	7	6035393	Intron 7-8	G	A	-	10588	1	0.00944465
991	7	6035390	Intron 7-8	A	G	rs569361397	13245	2	0.0151
992	7	6035371	Intron 7-8	C	A	-	10588	1	0.00944465
993	7	6035366	Intron 7-8	G	C	-	10588	1	0.00944465
994	7	6035353	Intron 7-8	A	C	-	10588	2	0.0188893
995	7	6035328	Intron 7-8	A	G	-	10588	1	0.00944465
996	7	6035323	Intron 7-8	A	G	rs1020008855	10588	1.5	0.014167
997	7	6035302	Intron 7-8	G	A	-	10588	1	0.00944465
998	7	6035297	Intron 7-8	C	A	rs747731417	10588	1	0.00944465
999	7	6035289	Intron 7-8	G	C	-	10588	1	0.00944465
1000	7	6035107	Intron 8-9	T	C	-	2657	1	0.0376364
1001	7	6035099	Intron 8-9	-	A	-	10588	1	0.00944465
1002	7	6035092	Intron 8-9	A	G	-	13245	3	0.0226501
1003	7	6035081	Intron 8-9	G	A	rs3815383	14542	5360.5	36.8622
1004	7	6035080	Intron 8-9	C	T	-	10588	2.5	0.0236116
1005	7	6035080	Intron 8-9	C	G	-	10588	1	0.00944465
1006	7	6035067	Intron 8-9	G	C	-	2657	1	0.0376364
1007	7	6035065	Intron 8-9	A	C	rs12534423	14542	5347	36.7694
1008	7	6035021	Intron 8-9	C	A	rs12702462	13945	1162	8.33274
1009	7	6035016	Intron 8-9	G	A	rs200120555	13855	128.5	0.927463
1010	7	6035009	Intron 8-9	T	C	-	2657	1	0.0376364
1011	7	6034958	Intron 8-9	G	A	-	10588	1	0.00944465
1012	7	6034957	Intron 8-9	T	C	-	10588	1	0.00944465
1013	7	6034953	Intron 8-9	C	A	-	2657	1	0.0376364
1014	7	6034949	Intron 8-9	T	G	-	10588	2.5	0.0236116
1015	7	6034943	Intron 8-9	C	T	-	10588	1	0.00944465
1016	7	6034919	Intron 8-9	C	T	rs542568831	13245	4.5	0.0339751
1017	7	6034867	Intron 8-9	C	A	rs373513306	13335	41.5	0.311211
1018	7	6034857	Intron 8-9	G	A	-	13245	18.5	0.139675
1019	7	6034849	Intron 8-9	G	T	-	10588	1	0.00944465
1020	7	6034839	Intron 8-9	T	C	-	10588	1	0.00944465
1021	7	6034819	Intron 8-9	A	C	rs7455872	14542	11201.5	77.0286
1022	7	6034818	Intron 8-9	A	G	rs2881030	14542	11201.5	77.0286
1023	7	6034813	Intron 8-9	C	T	rs948981649	13244	16.5	0.124585
1024	7	6034803	Intron 8-9	G	T	rs567980851	10588	1	0.00944465
1025	7	6034740	Intron 8-9	C	T	-	10588	1	0.00944465
1026	7	6034737	Intron 8-9	C	T	rs955193047	10588	2.5	0.0236116
1027	7	6034729	Intron 8-9	C	T	-	10588	1	0.00944465
1028	7	6034721	Intron 8-9	T	A	-	2657	1	0.0376364
1029	7	6034700	Intron 8-9	G	A	rs975276215	10588	1	0.00944465
1030	7	6034681	Intron 8-9	T	A	rs1016883376	10588	2.5	0.0236116
1031	7	6034680	Intron 8-9	T	C	-	2657	1	0.0376364
1032	7	6034679	Intron 8-9	A	T	rs187016677	13855	117.5	0.848069
1033	7	6034672	Intron 8-9	T	A	rs572094928	13245	2	0.0151
1034	7	6034670	Intron 8-9	T	A	rs2345061	13855	1996	14.4064
1035	7	6034669	Intron 8-9	T	-	-	2657	7	0.263455
1036	7	6034668	Intron 8-9	-	AT	-	10588	1	0.00944465
1037	7	6034651	Intron 8-9	G	C	-	10588	1	0.00944465
1038	7	6034607	Intron 8-9	C	T	-	10588	1	0.00944465
1039	7	6034601	Intron 8-9	T	A	rs569938650	90	1	1.11111
1040	7	6034596	Intron 8-9	T	G	-	10588	1	0.00944465
1041	7	6034593	Intron 8-9	T	C	-	2657	1	0.0376364
1042	7	6034584	Intron 8-9	G	A	rs758509373	13245	3	0.0226501
1043	7	6034582	Intron 8-9	C	T	-	10588	1	0.00944465
1044	7	6034579	Intron 8-9	A	G	-	10588	1	0.00944465
1045	7	6034577	Intron 8-9	C	A	-	10588	1	0.00944465
1046	7	6034511	Intron 8-9	T	C	-	10588	1	0.00944465
1047	7	6034467	Intron 8-9	C	-	-	10588	1	0.00944465
1048	7	6034463	Intron 8-9	C	G	rs983107633	13245	3	0.0226501
1049	7	6034451	Intron 8-9	C	T	rs559014712	13335	13.5	0.101237
1050	7	6034449	Intron 8-9	T	G	-	10588	1	0.00944465
1051	7	6034407	Intron 8-9	-	A	rs920811078	2657	2	0.0752729
1052	7	6034407	Intron 8-9	G	T	-	610	1	0.163934
1053	7	6034385	Intron 8-9	T	C	-	10588	2.5	0.0236116
1054	7	6034384	Intron 8-9	G	A	-	13245	4.5	0.0339751
1055	7	6034377	Intron 8-9	A	G	-	10588	1.5	0.014167
1056	7	6034363	Intron 8-9	C	T	rs1013028125	2657	2	0.0752729
1057	7	6034362	Intron 8-9	A	G	rs893311560	13245	31	0.234051
1058	7	6034356	Intron 8-9	G	A	-	13245	7.5	0.0566251
1059	7	6034343	Intron 8-9	C	T	-	13245	3	0.0226501
1060	7	6034340	Intron 8-9	G	T	-	10588	1	0.00944465
1061	7	6034331	Intron 8-9	T	C	rs1051518195	10588	1.5	0.014167
1062	7	6034322	Intron 8-9	G	A	-	10588	3.5	0.0330563
1063	7	6034320	Intron 8-9	T	C	-	10588	1	0.00944465
1064	7	6034311	Intron 8-9	G	T	-	13245	6.5	0.0490751
1065	7	6034302	Intron 8-9	G	A	rs905811427	10588	1	0.00944465
1066	7	6034293	Intron 8-9	G	C	rs12540010	14542	5182	35.6347
1067	7	6034282	Intron 8-9	C	T	-	13245	4	0.0302001
1068	7	6034280	Intron 8-9	A	G	-	13245	8.5	0.0641752
1069	7	6034279	Intron 8-9	C	T	-	13245	2	0.0151
1070	7	6034276	Intron 8-9	A	G	rs555685630	13245	17.5	0.132125
1071	7	6034275	Intron 8-9	C	T	rs927924992	10588	5	0.0472233
1072	7	6034267	Intron 8-9	C	T	rs1023305330	10588	1	0.00944465
1073	7	6034265	Intron 8-9	G	T	-	10588	1	0.00944465
1074	7	6034261	Intron 8-9	A	G	rs1033584341	2657	1	0.0376364
1075	7	6034248	Intron 8-9	A	-	-	10588	4.5	0.0425009
1076	7	6034248	Intron 8-9	-	A	rs943619912	10588	2.5	0.0236116
1077	7	6034232	Intron 8-9	G	A	rs903432668	10588	1	0.00944465
1078	7	6034231	Intron 8-9	C	T	-	10588	1	0.00944465
1079	7	6034229	Intron 8-9	C	G	-	10588	1	0.00944465
1080	7	6034222	Intron 8-9	G	A	-	10588	1.5	0.014167
1081	7	6034221	Intron 8-9	G	A	rs998153766	13242	2	0.0151035
1082	7	6034220	Intron 8-9	A	C	rs4724767	14542	13261	91.191
1083	7	6034220	Intron 8-9	A	T	rs4724767	10588	1	0.00944465
1084	7	6034219	Intron 8-9	A	G	rs1039786537	10586	1.5	0.0141697
1085	7	6034215	Intron 8-9	T	C	rs941439075	10588	1	0.00944465
1086	7	6034205	Intron 8-9	C	T	-	10588	1	0.00944465
1087	7	6034203	Intron 8-9	A	G	rs111515162	13945	1507	10.8067
1088	7	6034201	Intron 8-9	A	G	rs539621682	10588	1	0.00944465
1089	7	6034192	Intron 8-9	AGG	-	-	10588	1	0.00944465
1090	7	6034190	Intron 8-9	G	A	-	10588	1	0.00944465
1091	7	6034186	Intron 8-9	C	T	rs11976660	10588	1	0.00944465
1092	7	6034180	Intron 8-9	G	A	rs528953019	13245	21.5	0.162325
1093	7	6034179	Intron 8-9	C	T	rs561528949	13855	3.5	0.0252616
1094	7	6034175	Intron 8-9	T	C	rs543363688	13245	24	0.1812
1095	7	6034171	Intron 8-9	G	A	rs564366489	13245	24	0.1812
1096	7	6034170	Intron 8-9	C	T	rs144186083	10588	1	0.00944465
1097	7	6034152	Intron 8-9	T	C	rs541189522	13335	26	0.194976
1098	7	6034132	Intron 8-9	C	T	rs1046272878	10588	1	0.00944465
1099	7	6034130	Intron 8-9	C	T	-	10588	1	0.00944465
1100	7	6034129	Intron 8-9	G	A	-	10588	1	0.00944465
1101	7	6034125	Intron 8-9	C	T	-	10588	1	0.00944465
1102	7	6034118	Intron 8-9	G	T	-	2657	1	0.0376364
1103	7	6034116	Intron 8-9	T	C	-	10588	1	0.00944465
1104	7	6034115	Intron 8-9	A	G	rs111623216	10588	1	0.00944465
1105	7	6034108	Intron 8-9	T	C	rs576376252	10588	1	0.00944465
1106	7	6034106	Intron 8-9	G	A	-	10588	1	0.00944465
1107	7	6034100	Intron 8-9	C	A	-	10588	1	0.00944465
1108	7	6034077	Intron 8-9	G	C	rs560419922	10588	1	0.00944465
1109	7	6034063	Intron 8-9	G	A	rs146381203	13335	36.5	0.273716
1110	7	6034062	Intron 8-9	C	T	rs770492034	10588	1	0.00944465
1111	7	6034054	Intron 8-9	G	A	-	10588	1	0.00944465
1112	7	6033976	Intron 8-9	C	T	-	10588	1	0.00944465
1113	7	6033967	Intron 8-9	G	A	rs535205142	13245	2	0.0151
1114	7	6033949	Intron 8-9	T	G	-	10588	1	0.00944465
1115	7	6033942	Intron 8-9	G	T	-	10588	1	0.00944465
1116	7	6033936	Intron 8-9	C	T	-	13245	2.5	0.018875
1117	7	6033928	Intron 8-9	T	-	-	10588	1	0.00944465
1118	7	6033922	Intron 8-9	G	A	-	2657	1	0.0376364
1119	7	6033911	Intron 8-9	C	G	rs976915658	10588	1	0.00944465
1120	7	6033906	Intron 8-9	G	A	-	10588	1	0.00944465
1121	7	6033902	Intron 8-9	C	G	-	13245	6.5	0.0490751
1122	7	6033902	Intron 8-9	C	T	-	2657	1	0.0376364
1123	7	6033892	Intron 8-9	A	G	-	2657	1	0.0376364
1124	7	6033883	Intron 8-9	G	A	rs79159932	14542	4984.5	34.2766
1125	7	6033883	Intron 8-9	G	C	-	10588	1	0.00944465
1126	7	6033882	Intron 8-9	C	T	rs368643632	13245	10.5	0.0792752
1127	7	6033881	Intron 8-9	G	A	rs185180413	13245	22	0.1661
1128	7	6033879	Intron 8-9	G	A	-	10588	2	0.0188893
1129	7	6033872	Intron 8-9	C	T	-	10588	1	0.00944465
1130	7	6033868	Intron 8-9	C	T	rs144326464	13245	37	0.279351
1131	7	6033840	Intron 8-9	G	A	rs61403633	13245	3	0.0226501
1132	7	6033830	Intron 8-9	G	A	-	10588	1	0.00944465
1133	7	6033807	Intron 8-9	T	A	-	2657	1	0.0376364
1134	7	6033798	Intron 8-9	G	C	-	10588	1	0.00944465
1135	7	6033796	Intron 8-9	G	A	-	10588	1	0.00944465
1136	7	6033795	Intron 8-9	C	A	-	10588	1	0.00944465
1137	7	6033752	Intron 8-9	G	A	-	13245	3	0.0226501
1138	7	6033746	Intron 8-9	G	T	-	10588	1	0.00944465
1139	7	6033742	Intron 8-9	G	A	rs931565437	10588	1	0.00944465
1140	7	6033741	Intron 8-9	C	T	-	13245	4	0.0302001
1141	7	6033740	Intron 8-9	G	A	rs918876178	10588	1	0.00944465
1142	7	6033739	Intron 8-9	C	T	-	10588	1	0.00944465
1143	7	6033733	Intron 8-9	G	A	-	10588	1	0.00944465
1144	7	6033715	Intron 8-9	T	C	-	10588	1	0.00944465
1145	7	6033713	Intron 8-9	T	-	-	10588	1	0.00944465
1146	7	6033706	Intron 8-9	A	G	-	10588	1	0.00944465
1147	7	6033701	Intron 8-9	C	G	-	10588	1	0.00944465
1148	7	6033678	Intron 8-9	A	G	-	10588	3	0.028334
1149	7	6033652	Intron 8-9	A	C	-	13245	11	0.0830502
1150	7	6033647	Intron 8-9	T	C	-	10588	1	0.00944465
1151	7	6033634	Intron 8-9	G	A	-	10588	1	0.00944465
1152	7	6033623	Intron 8-9	A	T	-	10588	1	0.00944465
1153	7	6033604	Intron 8-9	T	C	-	10588	1	0.00944465
1154	7	6033594	Intron 8-9	A	T	-	90	1	1.11111
1155	7	6033572	Intron 8-9	A	T	rs138425267	13245	43	0.324651
1156	7	6033570	Intron 8-9	T	A	-	10588	1	0.00944465
1157	7	6033550	Intron 8-9	C	A	-	10588	5.5	0.0519456
1158	7	6033535	Intron 8-9	T	C	rs549834459	13245	4	0.0302001
1159	7	6033534	Intron 8-9	A	T	-	10588	1	0.00944465
1160	7	6033526	Intron 8-9	T	C	-	13245	7.5	0.0566251
1161	7	6033488	Intron 8-9	T	C	-	10584	1	0.00944822
1162	7	6033481	Intron 8-9	G	A	-	13245	17	0.12835
1163	7	6033480	Intron 8-9	C	T	rs180914892	13245	5	0.0377501
1164	7	6033472	Intron 8-9	T	A	-	10588	2	0.0188893
1165	7	6033469	Intron 8-9	G	A	rs12702461	13335	1144.5	8.58268
1166	7	6033469	Intron 8-9	G	T	-	13245	6.5	0.0490751
1167	7	6033451	Intron 8-9	C	T	-	10588	1	0.00944465
1168	7	6033448	Intron 8-9	T	C	rs943110263	10588	1	0.00944465
1169	7	6033429	Intron 8-9	-	TGCAGTGAG	-	10588	1	0.00944465
1170	7	6033423	Intron 8-9	C	T	-	10588	1	0.00944465
1171	7	6033420	Intron 8-9	A	G	-	10588	1	0.00944465
1172	7	6033388	Intron 8-9	A	T	-	13245	2	0.0151
1173	7	6033385	Intron 8-9	G	C	-	10588	1	0.00944465
1174	7	6033383	Intron 8-9	T	C	-	2657	1	0.0376364
1175	7	6033372	Intron 8-9	G	C	-	10588	1	0.00944465
1176	7	6033370	Intron 8-9	T	C	-	10588	1.5	0.014167
1177	7	6033320	Intron 8-9	C	T	rs181581798	10588	2	0.0188893
1178	7	6033289	Intron 8-9	C	T	rs189936734	13245	41.5	0.313326
1179	7	6033265	Intron 8-9	G	A	-	10588	1	0.00944465
1180	7	6033264	Intron 8-9	C	T	rs185403963	13245	5	0.0377501
1181	7	6033248	Intron 8-9	C	G	-	10588	1	0.00944465
1182	7	6033222	Intron 8-9	G	A	-	10588	1	0.00944465
1183	7	6033221	Intron 8-9	C	T	rs374061145	10588	1	0.00944465
1184	7	6033220	Intron 8-9	G	A	-	10588	1	0.00944465
1185	7	6033219	Intron 8-9	C	T	rs564149373	13245	16	0.1208
1186	7	6033216	Intron 8-9	G	A	rs1020829170	10588	1	0.00944465
1187	7	6033215	Intron 8-9	C	T	rs997451586	10588	1	0.00944465
1188	7	6033207	Intron 8-9	C	A	-	10588	1	0.00944465
1189	7	6033187	Intron 8-9	A	T	rs193049957	13335	183	1.37233
1190	7	6033180	Intron 8-9	T	C	-	10588	2.5	0.0236116
1191	7	6033166	Intron 8-9	G	A	rs995651353	10588	1	0.00944465
1192	7	6033162	Intron 8-9	A	T	-	10588	1	0.00944465
1193	7	6033145	Intron 8-9	C	T	rs897333912	10588	1	0.00944465
1194	7	6033095	Intron 8-9	T	A	rs113516018	13245	7	0.0528501
1195	7	6033067	Intron 8-9	G	C	rs1055046172	10586	1	0.00944644
1196	7	6033060	Intron 8-9	-	TGC	-	13245	277.5	2.09513
1197	7	6033060	Intron 8-9	-	TGT	rs10686447	11795	10404.5	88.2111
1198	7	6033040	Intron 8-9	C	A	-	2657	7	0.263455
1199	7	6033030	Intron 8-9	G	A	-	2657	22	0.828002
1200	7	6032959	Intron 8-9	G	C	rs925356704	13245	25.5	0.192525
1201	7	6032959	Intron 8-9	G	T	-	10588	1	0.00944465
1202	7	6032958	Intron 8-9	C	A	-	10588	1	0.00944465
1203	7	6032935	Intron 8-9	G	C	rs138211261	10588	1	0.00944465
1204	7	6032931	Intron 8-9	G	T	-	10588	1	0.00944465
1205	7	6032921	Intron 8-9	G	C	rs147021356	10588	7	0.0661126
1206	7	6032893	Intron 8-9	T	G	-	10588	1.5	0.014167
1207	7	6032893	Intron 8-9	T	C	-	10588	1	0.00944465
1208	7	6032884	Intron 8-9	C	T	-	10588	1	0.00944465
1209	7	6032804	Intron 8-9	C	G	-	2657	1	0.0376364
1210	7	6032803	Intron 8-9	A	T	-	10588	1	0.00944465
1211	7	6032797	Intron 8-9	T	A	-	10588	1	0.00944465
1212	7	6032792	Intron 8-9	A	G	-	10588	1	0.00944465
1213	7	6032772	Intron 8-9	C	A	-	2657	1	0.0376364
1214	7	6032771	Intron 8-9	G	T	-	10588	1	0.00944465
1215	7	6032759	Intron 8-9	T	G	-	10588	1	0.00944465
1216	7	6032757	Intron 8-9	T	G	-	10588	1.5	0.014167
1217	7	6032748	Intron 8-9	T	A	rs12702460	13335	1142	8.56393
1218	7	6032746	Intron 8-9	A	G	-	10588	1	0.00944465
1219	7	6032729	Intron 8-9	C	T	-	13245	3.5	0.0264251
1220	7	6032715	Intron 8-9	A	C	-	10588	1	0.00944465
1221	7	6032708	Intron 8-9	T	C	-	10588	1	0.00944465
1222	7	6032703	Intron 8-9	C	T	rs183460345	13335	7	0.0524934
1223	7	6032702	Intron 8-9	G	A	-	10588	1	0.00944465
1224	7	6032689	Intron 8-9	A	G	-	10588	1	0.00944465
1225	7	6032670	Intron 8-9	C	T	-	2657	1	0.0376364
1226	7	6032657	Intron 8-9	T	C	rs533778730	10588	1	0.00944465
1227	7	6032655	Intron 8-9	A	T	-	10588	1.5	0.014167
1228	7	6032648	Intron 8-9	TTAAAAAA	-	-	2657	1	0.0376364
1229	7	6032624	Intron 8-9	A	T	-	10588	1	0.00944465
1230	7	6032612	Intron 8-9	TTA	-	-	10588	1	0.00944465
1231	7	6032594	Intron 8-9	A	G	-	10588	1	0.00944465
1232	7	6032583	Intron 8-9	A	G	-	10588	1	0.00944465
1233	7	6032582	Intron 8-9	G	C	rs574990202	10588	1	0.00944465
1234	7	6032545	Intron 8-9	T	C	rs928160925	10588	1.5	0.014167
1235	7	6032538	Intron 8-9	T	C	-	10588	1	0.00944465
1236	7	6032517	Intron 8-9	C	G	-	10588	4	0.0377786
1237	7	6032511	Intron 8-9	G	C	rs112099982	13245	7	0.0528501
1238	7	6032501	Intron 8-9	T	C	-	2657	1	0.0376364
1239	7	6032489	Intron 8-9	G	A	-	10588	1	0.00944465
1240	7	6032427	Intron 8-9	T	G	-	10588	1.5	0.014167
1241	7	6032418	Intron 8-9	A	G	rs145642038	13335	101	0.757405
1242	7	6032384	Intron 8-9	A	G	-	2657	1	0.0376364
1243	7	6032366	Intron 8-9	T	C	-	10588	1	0.00944465
1244	7	6032358	Intron 8-9	T	C	-	10588	1	0.00944465
1245	7	6032332	Intron 8-9	T	C	-	10588	1	0.00944465
1246	7	6032248	Intron 8-9	G	A	-	10588	1	0.00944465
1247	7	6032241	Intron 8-9	A	T	-	13245	6	0.0453001
1248	7	6032233	Intron 8-9	A	G	rs368279216	10588	1	0.00944465
1249	7	6032219	Intron 8-9	G	C	-	10588	1	0.00944465
1250	7	6032198	Intron 8-9	G	A	rs550405214	10588	2	0.0188893
1251	7	6032197	Intron 8-9	C	A	rs182474067	13245	15.5	0.117025
1252	7	6032197	Intron 8-9	C	T	rs182474067	13945	47	0.337038
1253	7	6032193	Intron 8-9	C	T	rs146785775	10588	1.5	0.014167
1254	7	6032183	Intron 8-9	T	C	-	10588	1	0.00944465
1255	7	6032171	Intron 8-9	G	C	-	10588	1	0.00944465
1256	7	6032152	Intron 8-9	T	C	rs1031614732	13245	4	0.0302001
1257	7	6032099	Intron 8-9	C	T	-	10588	1	0.00944465
1258	7	6032087	Intron 8-9	A	C	rs568917025	10588	1	0.00944465
1259	7	6032043	Intron 8-9	G	A	rs188259598	13245	11	0.0830502
1260	7	6032042	Intron 8-9	C	T	rs577499853	13245	2	0.0151
1261	7	6032033	Intron 8-9	C	G	-	10588	1	0.00944465
1262	7	6032029	Intron 8-9	C	A	-	2657	1	0.0376364
1263	7	6032008	Intron 8-9	T	C	-	10588	1	0.00944465
1264	7	6031980	Intron 8-9	C	T	rs540326025	13335	10.5	0.0787402
1265	7	6031973	Intron 8-9	G	A	-	13245	7.5	0.0566251
1266	7	6031972	Intron 8-9	C	T	rs976912225	10588	2	0.0188893
1267	7	6031957	Intron 8-9	C	T	rs7776504	610	35	5.7377
1268	7	6031957	Intron 8-9	C	-	rs748321124	610	5	0.819672
1269	7	6031956	Intron 8-9	TC	-	rs765575929	610	2	0.327869
1270	7	6031955	Intron 8-9	TTC	-	-	610	3	0.491803
1271	7	6031947	Intron 8-9	-	T	-	2657	11	0.414001
1272	7	6031943	Intron 8-9	C	T	-	10588	1	0.00944465
1273	7	6031942	Intron 8-9	G	A	-	10588	1	0.00944465
1274	7	6031933	Intron 8-9	G	A	-	10588	2	0.0188893
1275	7	6031916	Intron 8-9	A	G	-	10588	1	0.00944465
1276	7	6031914	Intron 8-9	T	A	-	11198	2	0.0178603
1277	7	6031908	Intron 8-9	C	A	-	10588	1.5	0.014167
1278	7	6031904	Intron 8-9	T	A	-	10588	1	0.00944465
1279	7	6031900	Intron 8-9	G	T	rs191825021	13245	2.5	0.018875
1280	7	6031885	Intron 8-9	A	T	-	10588	1	0.00944465
1281	7	6031869	Intron 8-9	G	T	-	2657	1	0.0376364
1282	7	6031858	Intron 8-9	G	A	-	10588	1	0.00944465
1283	7	6031831	Intron 8-9	C	T	rs546343499	10588	1	0.00944465
1284	7	6031817	Intron 8-9	T	C	-	2657	1	0.0376364
1285	7	6031807	Intron 8-9	T	G	rs566845522	2657	1	0.0376364
1286	7	6031805	Intron 8-9	T	A	-	3267	5	0.153046
1287	7	6031805	Intron 8-9	T	-	rs373566669	610	214	35.082
1288	7	6031805	Intron 8-9	-	T	-	610	1	0.163934
1289	7	6031805	Intron 8-9	TT	-	-	610	24	3.93443
1290	7	6031804	Intron 8-9	-	T	-	610	39	6.39344
1291	7	6031804	Intron 8-9	G	-	rs888103410	610	1	0.163934
1292	7	6031790	Intron 8-9	G	A	-	10588	1	0.00944465
1293	7	6031773	Intron 8-9	C	T	rs932878312	610	1	0.163934
1294	7	6031743	Intron 8-9	C	G	-	13245	3	0.0226501
1295	7	6031743	Intron 8-9	C	T	-	10588	1	0.00944465
1296	7	6031738	Intron 8-9	C	T	rs746395710	13245	5.5	0.0415251
1297	7	6031730	Intron 8-9	G	A	-	10588	1	0.00944465
1298	7	6031724	Intron 8-9	A	C	-	2657	1	0.0376364
1299	7	6031717	Intron 8-9	A	T	rs747198931	11198	6	0.053581
1300	7	6031593	Intron 9-10	A	G	rs139969671	13245	9.5	0.0717252
1301	7	6031579	Intron 9-10	G	T	-	10588	1	0.00944465
1302	7	6031548	Intron 9-10	A	C	-	10588	1.5	0.014167
1303	7	6031536	Intron 9-10	C	T	-	10588	1	0.00944465
1304	7	6031521	Intron 9-10	C	G	-	610	1	0.163934
1305	7	6031511	Intron 9-10	T	G	-	10588	1	0.00944465
1306	7	6031464	Intron 9-10	C	A	-	10588	1	0.00944465
1307	7	6031462	Intron 9-10	C	A	-	13245	11	0.0830502
1308	7	6031445	Intron 9-10	G	A	rs151093915	10588	1	0.00944465
1309	7	6031427	Intron 9-10	G	A	rs374370507	13855	173	1.24865
1310	7	6031424	Intron 9-10	C	G	-	13245	3	0.0226501
1311	7	6031419	Intron 9-10	G	A	rs1044096899	13245	2	0.0151
1312	7	6031418	Intron 9-10	C	T	rs142909292	10588	1	0.00944465
1313	7	6031415	Intron 9-10	A	G	rs556507810	10588	1	0.00944465
1314	7	6031398	Intron 9-10	A	G	rs577476127	13245	81	0.611552
1315	7	6031395	Intron 9-10	G	A	-	13245	16	0.1208
1316	7	6031394	Intron 9-10	C	T	rs910401877	2657	1	0.0376364
1317	7	6031385	Intron 9-10	G	A	-	10588	2	0.0188893
1318	7	6031384	Intron 9-10	C	T	-	10588	3.5	0.0330563
1319	7	6031348	Intron 9-10	T	C	-	2657	2	0.0752729
1320	7	6031341	Intron 9-10	G	A	rs534517193	13245	4	0.0302001
1321	7	6031327	Intron 9-10	A	T	-	10588	1	0.00944465
1322	7	6031288	Intron 9-10	G	A	-	10588	1	0.00944465
1323	7	6031286	Intron 9-10	C	T	rs147156104	10588	1	0.00944465
1324	7	6031274	Intron 9-10	T	C	-	2657	1	0.0376364
1325	7	6031267	Intron 9-10	G	A	rs59254844	10588	1	0.00944465
1326	7	6031253	Intron 9-10	G	A	-	10588	1	0.00944465
1327	7	6031252	Intron 9-10	C	T	-	10588	1	0.00944465
1328	7	6031242	Intron 9-10	G	A	rs1040454902	10588	1.5	0.014167
1329	7	6031241	Intron 9-10	C	T	rs532895426	10588	4.5	0.0425009
1330	7	6031218	Intron 9-10	C	T	-	10588	1	0.00944465
1331	7	6031198	Intron 9-10	C	G	-	10588	1	0.00944465
1332	7	6031197	Intron 9-10	A	T	-	10588	1	0.00944465
1333	7	6031189	Intron 9-10	G	A	-	10588	1	0.00944465
1334	7	6031188	Intron 9-10	G	A	-	13245	5.5	0.0415251
1335	7	6031169	Intron 9-10	A	-	rs34698038	610	3	0.491803
1336	7	6031135	Intron 9-10	A	G	-	10588	1	0.00944465
1337	7	6031129	Intron 9-10	T	C	-	10588	1	0.00944465
1338	7	6031128	Intron 9-10	A	G	-	10588	1	0.00944465
1339	7	6031126	Intron 9-10	A	G	rs78729452	10678	2	0.0187301
1340	7	6031120	Intron 9-10	C	G	-	10588	1	0.00944465
1341	7	6031111	Intron 9-10	T	A	-	13245	5.5	0.0415251
1342	7	6031102	Intron 9-10	A	-	rs72363238	610	1	0.163934
1343	7	6031101	Intron 9-10	A	-	-	13245	5869	44.3111
1344	7	6031094	Intron 9-10	T	C	-	10585	1	0.00944733
1345	7	6031038	Intron 9-10	A	G	-	10588	1	0.00944465
1346	7	6031032	Intron 9-10	T	-	-	13245	303	2.28766
1347	7	6031023	Intron 9-10	-	A	rs1020539609	2657	1	0.0376364
1348	7	6031005	Intron 9-10	C	G	-	13245	4.5	0.0339751
1349	7	6030955	Intron 9-10	T	C	rs577565107	13245	4	0.0302001
1350	7	6030953	Intron 9-10	T	A	-	10588	1	0.00944465
1351	7	6030913	Intron 9-10	G	C	-	2657	11	0.414001
1352	7	6030908	Intron 9-10	GA	-	-	13245	2	0.0151
1353	7	6030828	Intron 9-10	T	C	-	2657	5	0.188182
1354	7	6030805	Intron 9-10	T	A	-	10588	1	0.00944465
1355	7	6030722	Intron 9-10	A	G	rs55842018	13335	403	3.02212
1356	7	6030720	Intron 9-10	A	C	-	2657	1	0.0376364
1357	7	6030718	Intron 9-10	A	G	-	10588	1	0.00944465
1358	7	6030629	Intron 9-10	G	T	-	10588	1	0.00944465
1359	7	6030629	Intron 9-10	G	C	rs956940003	10588	1	0.00944465
1360	7	6030588	Intron 9-10	G	C	rs117279697	13245	5	0.0377501
1361	7	6030578	Intron 9-10	G	A	rs868682696	2657	2	0.0752729
1362	7	6030577	Intron 9-10	C	T	rs1050795777	13245	4.5	0.0339751
1363	7	6030565	Intron 9-10	G	A	rs528752659	13335	8.5	0.063742
1364	7	6030552	Intron 9-10	G	A	rs112735057	10588	1	0.00944465
1365	7	6030551	Intron 9-10	C	T	rs761081681	10588	1	0.00944465
1366	7	6030549	Intron 9-10	G	A	-	10588	1	0.00944465
1367	7	6030530	Intron 9-10	G	A	rs76190314	10588	1	0.00944465
[truncated: 1,057 more rows]
