# Supplementary material
Source: HighWire-hosted journal article supplement (https://jmg.bmj.com/content/59/7/652)
Supplement: inline-supplementary-material-7 [file inline-supplementary-material-7.xlsx]

## Sheet: Overlapped_1166
Table S6. MMR coding variants shared between general Chinese population and cancer patients
Gene	Exon*	HGVS			Reported**	dbSNP150	MAF***		Mutation Type	Variant Impact			Disease information		Carrier Rate (%)
		cDNA	Protein	Genome (hg19)			dbSNP150	1000g EAS		Final	ClinVar	InterVar	Disease distribution****	CLNREVSTAT*****
MLH1	1	c.-93G>A	-	g.37034946G>A	ClinVar	rs1800734	0.320487	0.5476	-	Benign	Benign	-	LS/HNPCC	+++	45.9108
MLH1	1	c.-28A>G	-	g.37035011A>G	ClinVar|gnomAD|ExAC|InSiGHT	rs56198082	0.000798722	0.002	-	Benign;Likely benign;Uncertain significance	Benign;Likely benign;Uncertain significance	-	LS/HNPCC|CRC|BC|OC	+++	0.251842
MLH1	6	c.462C>T	p.Asp154=	g.37050313C>T	ClinVar|gnomAD|ExAC	rs192938577	0.000199681	0.001	Synonymous SNV	Likely benign	Likely benign	Likely benign	-	++	0.263511
MLH1	8	c.637G>T	p.Val213Leu	g.37053550G>T	ClinVar|gnomAD|InSiGHT	rs2308317	-	-	Missense	Uncertain significance	Uncertain significance	Likely benign	LS/HNPCC	+++	0.0935897
MLH1	8	c.649C>T	p.Arg217Cys	g.37053562C>T	ClinVar|gnomAD|ExAC|InSiGHT	rs4986984	0.000599042	0.002	Missense	Uncertain significance	Uncertain significance	Likely benign	LS/HNPCC	+++	0.429707
MLH1	8	c.655A>G	p.Ile219Val	g.37053568A>G	ClinVar|COGR|gnomAD|ExAC|InSiGHT	rs1799977	0.129593	0.0258	Missense	Benign	Benign	Benign	LS/HNPCC|CRC	+++	2.78878
MLH1	9	c.704A>T	p.Asp235Val	g.37055949A>T	ClinVar|gnomAD|ExAC	rs587781505	-	-	Missense	Uncertain significance	Uncertain significance	Uncertain significance	CRC	++	0.0214387
MLH1	9	c.790C>T	p.His264Tyr	g.37056035C>T	ClinVar|COGR|gnomAD|ExAC|InSiGHT	rs63751597	-	-	Missense	Uncertain significance	Uncertain significance	Likely benign	LS/HNPCC|CRC	+++	0.00472233
MLH1	11	c.927C>T	p.Pro309=	g.37061843C>T	ClinVar|gnomAD|ExAC|InSiGHT	rs63749896	0.000399361	0.002	Synonymous SNV	Uncertain significance	Uncertain significance	Likely benign	CRC	+++	0.144055
MLH1	12	c.1128T>C	p.Asp376=	g.37067217T>C	ClinVar|gnomAD|ExAC|InSiGHT	rs267607824	-	-	Synonymous SNV	Benign	Benign	Likely benign	LS/HNPCC	+++	0.0846724
MLH1	12	c.1151T>A	p.Val384Asp	g.37067240T>A	ClinVar|COGR|gnomAD|ExAC|InSiGHT	rs63750447	0.00519169	0.0258	Missense	Benign	Benign	Benign	LS/HNPCC|CRC	+++	3.59267
MLH1	12	c.1153C>T	p.Arg385Cys	g.37067242C>T	ClinVar|gnomAD|ExAC|InSiGHT	rs63750760	-	-	Missense	Uncertain significance	Uncertain significance	Likely pathogenic	CRC|OC|BC	+++	0.0815301
MLH1	13	c.1415G>A	p.Arg472Lys	g.37070280G>A	ClinVar|gnomAD|ExAC	rs63750498	-	-	Missense	Uncertain significance	Uncertain significance	Uncertain significance	-	++	0.0329438
MLH1	13	c.1529A>G	p.Gln510Arg	g.37070394A>G	-	-	-	-	Nonsynonymous SNV	Likely benign	-	Likely benign	-	-	0.00472233
MLH1	16	c.1742C>T	p.Pro581Leu	g.37089020C>T	ClinVar|gnomAD|ExAC|InSiGHT	rs63751684	0.00119808	0.005	Missense	Likely benign	Likely benign	Likely benign	LS/HNPCC|CRC	+++	0.247285
MLH1	18	c.2101C>A	p.Gln701Lys	g.37090506C>A	ClinVar|gnomAD|ExAC|InSiGHT	rs63750114	0.00119808	0.006	Missense	Likely benign	Likely benign	Benign	LS/HNPCC|CRC	+++	0.881008
MSH2	1	c.-118T>C	-	g.47630213T>C	ClinVar|InSiGHT	rs2303425	0.100839	0.1865	-	Benign	Benign	-	CRC	+++	23.026
MSH2	1	c.14C>A	p.Pro5Gln	g.47630344C>A	ClinVar|gnomAD|ExAC|InSiGHT	rs56170584	0.000199681	0.001	Missense	Uncertain significance	Uncertain significance	Uncertain significance	LS/HNPCC|BC|Gastric cancer	+++	0.0850019
MSH2	1	c.23C>T	p.Thr8Met	g.47630353C>T	ClinVar|COGR|gnomAD|ExAC|InSiGHT|UMD	rs17217716	0.00519169	0.0119	Missense	Benign	Benign	Likely benign	LS/HNPCC|CRC	+++	1.96982
MSH2	3	c.471C>A	p.Gly157=	g.47637337C>A	ClinVar|gnomAD|ExAC|InSiGHT	rs61756463	0.00239617	0.0119	Synonymous SNV	Likely benign	Likely benign	Likely benign	-	+++	1.67664
MSH2	3	c.505A>G	p.Ile169Val	g.47637371A>G	ClinVar|gnomAD|ExAC|InSiGHT	rs63750716	0.000599042	0.003	Missense	Likely benign	Likely benign	Likely benign	LS/HNPCC|CRC	+++	0.822387
MSH2	7	c.1108G>A	p.Ala370Thr	g.47656912G>A	ClinVar|gnomAD|InSiGHT	rs1064794109	-	-	Missense	Uncertain significance	Uncertain significance	Uncertain significance	LS/HNPCC|CRC	++	0.0376364
MSH2	7	c.1121A>G	p.Gln374Arg	g.47656925A>G	ClinVar|gnomAD|ExAC	rs749660228	-	-	Missense	Uncertain significance	Uncertain significance	Uncertain significance	-	++	0.11126
MSH2	7	c.1168C>T	p.Leu390Phe	g.47656972C>T	ClinVar|gnomAD|ExAC|InSiGHT|UMD	rs17224367	0.00279553	0.0139	Missense	Benign	Benign	Likely benign	LS/HNPCC|CRC|EC	+++	3.08283
MSH2	7	c.1221C>G	p.Leu407=	g.47657025C>G	ClinVar|gnomAD|ExAC|InSiGHT	rs63750813	0.000199681	0.001	Synonymous SNV	Uncertain significance	Uncertain significance	Likely benign	-	+++	0.305949
MSH2	7	c.1223A>G	p.Tyr408Cys	g.47657027A>G	ClinVar|gnomAD|InSiGHT	rs63750379	-	-	Missense	Uncertain significance	Uncertain significance	Uncertain significance	CRC|Gastric cancer	+++	0.00472233
MSH2	7	c.1255C>A	p.Gln419Lys	g.47657059C>A	ClinVar|gnomAD|ExAC|InSiGHT	rs63750006	0.000798722	0.004	Missense	Likely benign	Likely benign	Likely benign	LS/HNPCC|CRC	+++	1.3207
MSH2	9	c.1480T>C	p.Ser494Pro	g.47690263T>C	ClinVar|gnomAD|ExAC	rs55653533	0.000199681	0.001	Missense	Uncertain significance	Uncertain significance	Uncertain significance	Suspected LS	++	0.0998675
MSH2	11	c.1690A>G	p.Thr564Ala	g.47698132A>G	ClinVar|gnomAD|ExAC|InSiGHT	rs55778204	0.000599042	0.003	Missense	Benign	Benign	Likely benign	LS/HNPCC|CRC	+++	0.632541
MSH2	12	c.1811C>G	p.Ala604Gly	g.47702215C>G	ExAC|InSiGHT	-	-	-	Missense	Uncertain significance	-	Uncertain significance	CRC	-	0.00472233
MSH2	12	c.1886A>G	p.Gln629Arg	g.47702290A>G	ClinVar|gnomAD|ExAC|InSiGHT	rs61756468	0.00219649	0.0089	Missense	Benign	Benign	Likely benign	LS/HNPCC|CRC	+++	2.54501
MSH2	12	c.2006-6T>C	-	g.47703500T>C	ClinVar|COGR|gnomAD|ExAC|InSiGHT	rs2303428	0.131989	0.3631	Splice site	Benign	Benign	-	LS/HNPCC|CRC	+++	58.0328
MSH2	14	c.2425G>A	p.Glu809Lys	g.47705625G>A	ClinVar|gnomAD|ExAC|InSiGHT	rs202145681	0.000399361	0.002	Missense	Benign;Likely benign;Uncertain significance	Benign;Likely benign;Uncertain significance	Likely benign	CRC	++	0.825296
MSH2	15	c.2516A>G	p.His839Arg	g.47707892A>G	ClinVar|gnomAD|ExAC|InSiGHT	rs63750027	-	-	Missense	Uncertain significance	Uncertain significance	Uncertain significance	LS/HNPCC	+++	0.229849
MSH6	1	c.116G>A	p.Gly39Glu	g.48010488G>A	ClinVar|gnomAD|ExAC|COGR|InSiGHT	rs1042821	0.200879	0.2758	Missense	Benign	Benign	Benign	LS/HNPCC|CRC	+++	38.0581
MSH6	4	c.644T>G	p.Val215Gly	g.48025766T>G	ClinVar|gnomAD|ExAC	rs587779946	-	-	Missense	Uncertain significance	Uncertain significance	Likely benign	-	++	0.0447199
MSH6	4	c.1063G>A	p.Gly355Ser	g.48026185G>A	ClinVar|gnomAD|ExAC|InSiGHT	rs587778531	-	-	Missense	Likely benign;Uncertain significance	Likely benign;Uncertain significance	Likely benign	CRC|Bladder cancer|Non-medullary thyroid cancer	++	0.408667
MSH6	4	c.1937A>G	p.Lys646Arg	g.48027059A>G	ClinVar|gnomAD|ExAC	rs201096652	0.000199681	0.001	Missense	Likely benign;Uncertain significance	Likely benign;Uncertain significance	Likely benign	EC|BC	++	0.450201
MSH6	4	c.2300C>G	p.Thr767Ser	g.48027422C>G	ClinVar|gnomAD|ExAC|InSiGHT	rs587781462	-	-	Missense	Uncertain significance	Uncertain significance	Uncertain significance	LS/HNPCC|CRC	++	0.117385
MSH6	4	c.2615T>C	p.Ile872Thr	g.48027737T>C	ClinVar|gnomAD	rs1064793342	-	-	Missense	Uncertain significance	Uncertain significance	Uncertain significance	-	++	0.0870787
MSH6	5	c.3226C>T	p.Arg1076Cys	g.48030612C>T	ClinVar|gnomAD|ExAC|InSiGHT	rs63750617	-	-	Missense	Likely pathogenic	Likely pathogenic	Likely pathogenic	LS/HNPCC|CRC|EC|OC|Glioblastoma	+++	0.0235405
MSH6	5	c.3306T>A	p.Thr1102=	g.48030692T>A	ClinVar|gnomAD|ExAC|COGR|InSiGHT	rs2020910	0.0493211	0.2153	Synonymous SNV	Benign	Benign	Likely benign	CRC	+++	30.4952
MSH6	6	c.3488A>T	p.Glu1163Val	g.48032098A>T	ClinVar|COGR|gnomAD|ExAC|InSiGHT	rs63750252	0.00279553	0.0139	Missense	Likely benign	Likely benign	Likely benign	LS/HNPCC|CRC	+++	2.49434
MSH6	8	c.3762A>T	p.Glu1254Asp	g.48033458A>T	ClinVar|gnomAD|ExAC|InSiGHT	rs375459388	0.000399361	0.002	Missense	Uncertain significance	Uncertain significance	Likely benign	CRC	+++	0.129437
MSH6	9	c.3851C>T	p.Thr1284Met	g.48033640C>T	ClinVar|gnomAD|ExAC|InSiGHT	rs63750836	-	-	Missense	Uncertain significance	Uncertain significance	Uncertain significance	LS/HNPCC|CRC|Pancreatic cancer	+++	0.00944465
MSH6	9	c.3980A>G	p.Asn1327Ser	g.48033769A>G	ClinVar|gnomAD|ExAC|InSiGHT	rs780187989	-	-	Missense	Uncertain significance	Uncertain significance	Uncertain significance	LS/HNPCC|CRC|BC|OC	++	0.0894398
PMS2	2	c.59G>A	p.Arg20Gln	g.6045627C>T	ClinVar|COGR|gnomAD|ExAC|InSiGHT	rs10254120	0.0756789	0.0942	Missense	Benign	Benign	Benign	CRC|BC|EC|Skin cancer	+++	21.4766
PMS2	3	c.166C>G	p.Leu56Val	g.6043687G>C	ClinVar|gnomAD|ExAC|InSiGHT	rs371011390	-	-	Missense	Benign;Likely benign;Uncertain significance	Benign;Likely benign;Uncertain significance	Likely benign	BC	++	0.124715
PMS2	4	c.288C>T	p.Ala96=	g.6043386G>A	ClinVar|gnomAD|ExAC|InSiGHT	rs12532895	0.113618	0.3284	Synonymous SNV	Benign	Benign	Benign	CRC|BC	+++	36.4711
PMS2	4	c.299A>C	p.Gln100Pro	g.6043375T>G	ClinVar|gnomAD|ExAC	rs747771951	-	-	Missense	Uncertain significance	Uncertain significance	Likely benign	-	++	0.030624
PMS2	5	c.379G>A	p.Ala127Thr	g.6042242C>T	ClinVar|gnomAD|ExAC	rs114090343	0.00179712	0.0089	Missense	Benign;Likely benign;Uncertain significance	Benign;Likely benign;Uncertain significance	Benign	-	++	1.56522
PMS2	5	c.383C>T	p.Ser128Leu	g.6042238G>A	ClinVar|gnomAD|ExAC	rs116373169	0.000998403	0.002	Missense	Benign;Likely benign;Uncertain significance	Benign;Likely benign;Uncertain significance	Benign	-	++	0.077634
PMS2	5	c.452G>A	p.Arg151His	g.6042169C>T	ClinVar|gnomAD|ExAC	rs35629870	0.000199681	-	Missense	Uncertain significance	Uncertain significance	Likely benign	LS/HNPCC	++	0.0235405
PMS2	6	c.598G>A	p.Val200Ile	g.6038846C>T	ClinVar|gnomAD|ExAC	rs587778620	-	-	Missense	Uncertain significance	Uncertain significance	Likely benign	-	++	0.0866895
PMS2	6	c.673G>T	p.Glu225Ter	g.6038771C>A	-	-	-	-	Stopgain	Pathogenic	-	Pathogenic	-	-	0.00472233
PMS2	7	c.780C>G	p.Ser260=	g.6036980G>C	ClinVar|COGR|gnomAD|ExAC|InSiGHT	rs1805319	0.83127	0.879	Synonymous SNV	Benign	Benign	Benign	CRC|BC|EC|Skin cancer	+++	97.7128
PMS2	8	c.883C>T	p.Arg295Trp	g.6035185G>A	ClinVar|gnomAD|ExAC	rs182246929	0.000199681	0.001	Missense	Uncertain significance	Uncertain significance	Likely benign	Suspected LS|CRC|BC	++	0.472308
PMS2	9	c.916G>A	p.Val306Met	g.6031676C>T	ClinVar|gnomAD|ExAC	rs587780063	-	-	Missense	Uncertain significance	Uncertain significance	Uncertain significance	CRC	++	0.0890507
PMS2	9	c.962T>C	p.Val321Ala	g.6031630A>G	ClinVar|gnomAD|ExAC	rs186448384	0.000199681	0.001	Missense	Uncertain significance	Uncertain significance	Likely benign	CRC	++	0.424305
PMS2	11	c.1408C>T	p.Pro470Ser	g.6026988G>A	ClinVar|COGR|gnomAD|ExAC|InSiGHT	rs1805321	0.358227	0.3601	Missense	Benign	Benign	Benign	LS/HNPCC|CRC|BC|EC|OC|Skin cancer	+++	57.3654
PMS2	11	c.1437C>G	p.His479Gln	g.6026959G>C	ClinVar|gnomAD|ExAC|InSiGHT	rs63750685	0.00279553	-	Missense	Uncertain significance	Uncertain significance	Benign	LS/HNPCC|CRC	++	0.108258
PMS2	11	c.1454C>A	p.Thr485Lys	g.6026942G>T	ClinVar|COGR|gnomAD|ExAC|InSiGHT	rs1805323	0.112021	0.3373	Missense	Benign	Benign	Benign	CRC|BC|EC	++	0.00472233
PMS2	11	c.1532C>T	p.Thr511Met	g.6026864G>A	ClinVar|gnomAD|ExAC|InSiGHT	rs74902811	0.0369409	0.0387	Missense	Benign	Benign	Benign	CRC	+++	4.77934
PMS2	11	c.1621A>G	p.Lys541Glu	g.6026775T>C	ClinVar|gnomAD|ExAC|InSiGHT	rs2228006	0.883187	0.878	Missense	Benign	Benign	Benign	-	++	97.7317
PMS2	11	c.1688G>A	p.Arg563Gln	g.6026708C>T	ClinVar|gnomAD|ExAC|InSiGHT	rs63750668	0.000399361	-	Missense	Likely benign;Uncertain significance	Likely benign;Uncertain significance	Likely benign	BC	++	0.296511
PMS2	11	c.1918G>A	p.Glu640Lys	g.6026478C>T	ClinVar|gnomAD	rs886062400	-	-	Missense	Uncertain significance	Uncertain significance	Uncertain significance	Lung cancer	++	0.0961342
PMS2	13	c.2253T>C	p.Phe751=	g.6018249A>G	ClinVar|COGR|gnomAD|ExAC|InSiGHT	rs1805325	-	-	Synonymous SNV	Benign	Benign	Likely benign	-	+++	0.0918716
PMS2	14	c.2324A>G	p.Asn775Ser	g.6017340T>C	ClinVar|gnomAD|ExAC	rs17420802	-	-	Missense	Benign	Benign	Likely benign	-	+++	0.188182
PMS2	14	c.2340C>T	p.Pro780=	g.6017324G>A	ClinVar|ExAC|COGR|InSiGHT	rs142230276	0.00119808	-	Synonymous SNV	Benign	Benign	Benign	LS/HNPCC|CRC|EC	+++	0.00948227
