# Supplementary material
Source: HighWire-hosted journal article supplement (https://jmg.bmj.com/content/59/7/652)
Supplement: inline-supplementary-material-10 [file inline-supplementary-material-10.xlsx]

## Sheet: Sheet1
Table S9. RPMDS classification of MLH1 unclassified variants
HGVS		Mutation type	InterVar prediction	Deviation (%)	Classification
cDNA	Protein
c.16G>A	p.Gly6Arg	Missense	Uncertain significance	26.8555	Deleterious
c.71T>C	p.Val24Ala	Missense	Uncertain significance	25.8789	Non-deleterious
c.98A>G	p.Lys33Arg	Missense	Uncertain significance	28.5156	Deleterious
c.185A>G	p.Gln62Arg	Missense	Uncertain significance	25	Non-deleterious
c.369G>T	p.Lys123Asn	Missense	Uncertain significance	23.2422	Non-deleterious
c.371G>T	p.Cys124Phe	Missense	Uncertain significance	26.1719	Non-deleterious
c.379A>G	p.Arg127Gly	Missense	Uncertain significance	18.5547	Non-deleterious
c.433A>G	p.Asn145Asp	Missense	Uncertain significance	24.5117	Non-deleterious
c.469T>C	p.Tyr157His	Missense	Uncertain significance	34.375	Deleterious
c.538G>A	p.Val180Ile	Missense	Uncertain significance	21.875	Non-deleterious
c.628G>T	p.Ala210Ser	Missense	Uncertain significance	47.8516	Deleterious
c.694G>C	p.Gly232Arg	Missense	Uncertain significance	25	Non-deleterious
c.722A>C	p.Lys241Thr	Missense	Uncertain significance	39.0625	Deleterious
c.742A>G	p.Asn248Asp	Missense	Uncertain significance	26.1719	Non-deleterious
c.880C>A	p.Leu294Ile	Missense	Uncertain significance	37.5977	Deleterious
c.880C>G	p.Leu294Val	Missense	Uncertain significance	25.8789	Non-deleterious
