# Supplementary material
Source: HighWire-hosted journal article supplement (https://jmg.bmj.com/content/59/7/652)

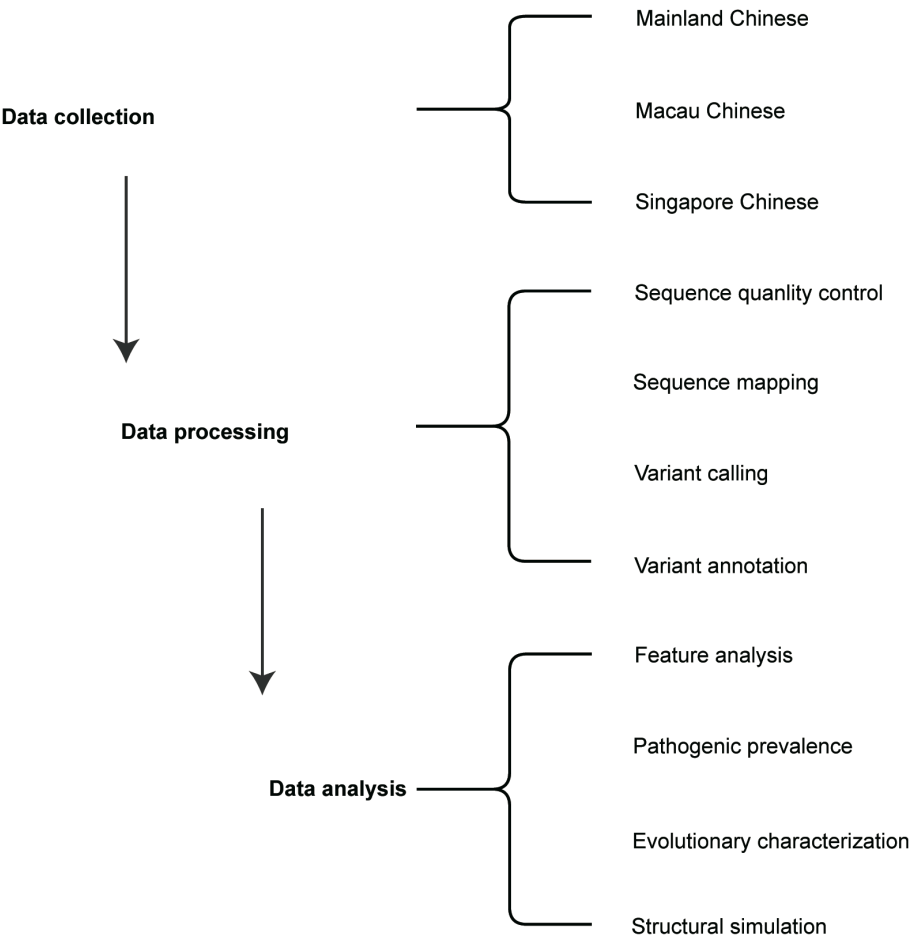

Supplement: inline-supplementary-material-2 [file inline-supplementary-material-2.pdf]
